# Supplementary material for: Hydrogenation of carbon dioxide to methanol using a homogeneous ruthenium–Triphos catalyst: from mechanistic investigations to multiphase catalysis
Source: PubMed Central journal article supplement (PMC6085670; doi:10.1039/c4sc02087a), 2014-08-27
Supplement: SC-006-C4SC02087A-s001.pdf [file SC-006-C4SC02087A-s001.pdf]

## Supporting information

### **Direct Hydrogenation of Carbon Dioxide to Methanol using a Homogeneous Ruthenium-Triphos Catalyst: From Mechanistic Investigations to Multiphase Catalysis**

*Sebastian Wesselbaum, Verena Moha, Markus Meuresch, Sandra Brosinski, Katharina M. Thenert, Jens Kothe, Thorsten vom Stein, Ulli Englert, Markus Hölscher, Jürgen Klankermayer\*, and Walter Leitner\**

S. Wesselbaum, V. Moha, M. Meuresch, S. Brosinski, K. M. Thenert, J. Kothe, T. vom Stein, Dr. M. Hölscher,

Prof. Dr. J. Klankermayer, Prof. Dr. W. Leitner

Institut für Technische und Makromolekulare Chemie

RWTH Aachen University

Worringerweg 1, D-52074 Aachen, Germany

E-Mail: [jklankermayer@itmc.rwth-aachen.de](mailto:jklankermayer@itmc.rwth-aachen.de); [leitner@itmc.rwth-aachen.de](mailto:leitner@itmc.rwth-aachen.de)

Prof. Dr. Ulli Englert

Institut für Anorganische Chemie

RWTH Aachen University

Landoltweg 1, D-52074 Aachen, Germany

## Table of contents

|     |                                                                                                                   |    |
|-----|-------------------------------------------------------------------------------------------------------------------|----|
| 1   | General.....                                                                                                      | 3  |
| 2   | Synthesis and characterisation of [(Triphos)Ru( $\eta^2$ -OAc)(S)]NTf <sub>2</sub> 4: .....                       | 4  |
| 3   | Synthesis of 1,1,1-tris{bis(4-methoxyphenyl)phosphinomethyl}ethan (Triphos-Anisyl) 15 .....                       | 9  |
| 4   | Synthesis of [Ru( $\eta^2$ -OAc)Cl(Triphos-Anisyl)] 10.....                                                       | 11 |
| 5   | General procedure for CO <sub>2</sub> hydrogenation experiments .....                                             | 13 |
| 6   | Spectroscopic investigations .....                                                                                | 15 |
| 6.1 | NMR-spectroscopic analysis of the reaction mixture using complex 2 together with HNTf <sub>2</sub> .....          | 15 |
| 6.2 | Generation and analysis of the formate complex 3 .....                                                            | 17 |
| 6.3 | Conversion of formate species 3a to methanol .....                                                                | 22 |
| 6.4 | In-situ NMR study of the CO <sub>2</sub> hydrogenation reaction using complex 2 with HNTf <sub>2</sub> .....      | 24 |
| 6.5 | NMR-spectroscopic analysis of the reaction mixture using complex 2 together with <i>p</i> -TsOH...27              |    |
| 6.6 | NMR-spectroscopic analysis of the reaction mixture using complex 2 in the absence of acid ...29                   |    |
| 6.7 | NMR-spectroscopic analysis of the reaction mixture using complex 12 together with HNTf <sub>2</sub> ...30         |    |
| 6.8 | In-situ NMR study of the CO <sub>2</sub> hydrogenation reaction using complex 4 .....                             | 32 |
| 7   | Repetitive-Batch experiments using 2-MTHF/H <sub>2</sub> O.....                                                   | 35 |
| 7.1 | Extraction of MeOH from 2-MTHF with water.....                                                                    | 35 |
| 7.2 | Repetitive batch experiment using complex 2 together with HNTf <sub>2</sub> in 2-MTHF.....                        | 35 |
| 8   | Additional catalysis results .....                                                                                | 36 |
| 9   | DFT Calculations .....                                                                                            | 37 |
| 9.1 | Computational Details.....                                                                                        | 37 |
| 9.2 | Hydrogenation of CO <sub>2</sub> to Methanediolate.....                                                           | 38 |
| 9.3 | Cleavage of the C-O bond and generation of formaldehyde – Protonolysis within the coordination sphere of Ru ..... | 38 |
| 9.4 | Influence of the coordination geometry (facial vs. meridional).....                                               | 40 |
| 9.5 | Calculated Energies.....                                                                                          | 42 |
| 10  | X-Ray crystal structure of 4a .....                                                                               | 46 |
| 11  | Literature.....                                                                                                   | 46 |
| 12  | Appendix: XYZ Coordinates of the calculated structures (Gas).....                                                 | 48 |

# 1 General

Safety advice: High-pressure experiments with compressed gases represent a significant safety risk and must be conducted only following appropriate safety procedures and in conjunction with the use of suitable equipment.

For complex synthesis and catalytic experiments, moisture and oxygen were excluded by working in a glove box or by using Schlenk techniques. Argon 4.8 (Messer, Germany) was used as inert gas. Glassware was dried under vacuum with a heat gun, evacuated and refilled with argon at least three times. All solvents were purified by distillation prior to use. Tetrahydrofuran, toluene and pentane were degassed by bubbling argon with a frit, dried by passing over activated alumina in steel columns and stored over molecular sieves. Acetonitrile, dioxane, and 2-methyltetrahydrofuran were degassed by distillation under argon and dried over molecular sieves. Water was degassed by bubbling argon with a frit. All reagents were commercially supplied by Aldrich, Fluka, Alfa Aesar and Heraeus Precious Metals and used as received unless stated otherwise. Reaction gases hydrogen (5.0) and carbon dioxide (4.6) were supplied by Linde and PraxAir and used without further purification. The complexes [(Triphos)Ru(TMM)] **2**<sup>[1]</sup>, [Ru( $\eta^2$ -OAc)Cl(Triphos)] **9**<sup>[2]</sup>, [(Triphos)Ru(H)<sub>2</sub>CO] **12**<sup>[3]</sup> and [Ru<sub>2</sub>( $\mu$ -H)<sub>2</sub>(Triphos)<sub>2</sub>] **6**<sup>[4]</sup> were synthesised according to literature procedures.

NMR spectra were recorded on samples in deuterated solvents with commercial spectrometers Bruker AV-600, AV-400 or AV-300 at room temperature unless stated otherwise. Chemical shifts  $\delta$  are given in ppm relative to tetramethylsilane (<sup>1</sup>H and <sup>13</sup>C) and 85% phosphoric acid (<sup>31</sup>P). First order spin multiplicities are abbreviated as singlet (s), doublet (d), triplet (t), quadruplet (qua), quintet (qui), sextet (sext) and septet (sep). Couplings of higher order or overlapped signals are denoted as multiplet (m), broadened signals as (br). First order coupling constants *J* are given in Hz. Assignments are based on attached proton tests (ATP) and 2-D correlation spectroscopy (HSQC, HMQC, HMBC).

Gas chromatography was performed on a *Trace GC* gas chromatograph (Thermo Scientific) equipped with a SSL Inlet (250 °C, Split 83 mL/min), a FS-Innopeg-2000 column (60 m, inner diameter 0.25 mm, film thickness 0.25  $\mu$ m) and a flame ionisation detector (250 °C) using helium as carrier gas and a temperature program: 10 min isothermal at 50 °C, ramp to 200 °C (8 °C/min), 30 min at 200 °C.

## 2 Synthesis and characterisation of [(Triphos)Ru( $\eta^2$ -OAc)(S)]NTf<sub>2</sub> **4**:

[Ru( $\eta^2$ -OAc)Cl(Triphos)] **9** (123.0 mg, 0.15 mmol) and AgNTf<sub>2</sub> (60.0 mg, 0.155 mmol, 1.03 eq.) were stirred in tetrahydrofuran (12 mL) at 60 °C for 3 hours. The solution was filtered over celite to remove the greyish precipitate and the solvent was removed in vacuo to give a yellow-orange solid (84 mg, yield = 53 %). NMR-spectra of the isolated complex **4** are shown in Figures 1 and 2.

Characterisation of the material by <sup>1</sup>H-, <sup>13</sup>C- and <sup>19</sup>F-NMR, FT-IR and by ESI-HRMS revealed the presence of the cation [(Triphos)Ru( $\eta^2$ -OAc)]<sup>+</sup> as well as the NTf<sub>2</sub><sup>-</sup> anion. Crystallisation from dichloromethane layered with pentane gave yellow single crystals of complex **4a** where the open coordination site was saturated with H<sub>2</sub>O from adventitious traces of water (X-Ray crystal structure of **4a** is shown in Scheme 2 in the main manuscript and CIF-data is available as electronic supporting information). Thus, the acetate complex in solution can be formulated as [(Triphos)Ru( $\eta^2$ -OAc)(S)] [NTf<sub>2</sub>] (**4**) with S being a free coordination site or weakly bound solvent molecule.

<sup>1</sup>H-NMR (600 MHz, *d*<sub>8</sub>-THF, rt):  $\delta$  = 7.49 - 7.05 (m, 30H, C<sub>Ar</sub>-H), 2.51 (br, 6H, P-CH<sub>2</sub>), 2.07 (s, 3H, O<sub>2</sub>CCH<sub>3</sub>), 1.74 (br qua, *J*<sub>H-P</sub> = 2.5 Hz, 3H, CH<sub>3</sub>) ppm.

<sup>13</sup>C{<sup>1</sup>H}-NMR (151 MHz, *d*<sub>8</sub>-THF, rt):  $\delta$  = 189.0 (s, O<sub>2</sub>CCH<sub>3</sub>), 135.7 (s, C<sub>Ar</sub>), 132.2 (s, C<sub>Ar</sub>-H), 129.2 (s, C<sub>Ar</sub>-H), 127.7 (s, C<sub>Ar</sub>-H), 120.3 (qua, *J*<sub>C-F</sub> = 321 Hz, CF<sub>3</sub>), 39.0 [s, (Ph<sub>2</sub>PCH<sub>2</sub>)<sub>3</sub>C-CH<sub>3</sub>], 35.8 (qua, *J*<sub>C-P</sub> = 10.8 Hz, CH<sub>3</sub>), 33.6 (br, P-CH<sub>2</sub>), 24.0 (m, O<sub>2</sub>CCH<sub>3</sub>) ppm.

<sup>31</sup>P{<sup>1</sup>H}-NMR (243 MHz, *d*<sub>8</sub>-THF, rt):  $\delta$  = 44.0 (s) ppm.

<sup>19</sup>F{<sup>1</sup>H}-NMR (566 MHz, *d*<sub>8</sub>-THF, rt):  $\delta$  = -79.81 (s) ppm.

<sup>1</sup>H-NMR (400 MHz, *d*<sub>2</sub>-DCM, rt):  $\delta$  = 7.29 - 7.05 (m, 30H, C<sub>Ar</sub>-H), 2.38 (br, 6H, P-CH<sub>2</sub>), 2.11 (s, 3H, O<sub>2</sub>CCH<sub>3</sub>), 1.69 (br qua, *J*<sub>H-P</sub> = 2.2 Hz, 3H, CH<sub>3</sub>) ppm.

<sup>31</sup>P{<sup>1</sup>H}-NMR (243 MHz, *d*<sub>2</sub>-DCM, rt):  $\delta$  = 42.5 (s) ppm.

ESI-HRMS (THF) positive ion: calculated for [(Triphos)Ru( $\eta^2$ -OAc)]<sup>+</sup>: *m/z* = 785.14411; determined: *m/z* = 785.14337.

ATR-IR:  $\tilde{\nu}$  = 3068 (w), 2966-2870 (w), 1521 (w), 1490 (w), 1464 (m), 1439 (m), 1352 (m), 1230 (w), 1184 (s), 1136 (m), 1094 (m), 1057 (s), 1002 (w), 949 (w), 837 (m), 791 (w), 739 (w), 693 (s), 654 (w), 614 (m), 600 (m), 571 (m), 548 (w), 517 (s), 489 (s), 415 (m) cm<sup>-1</sup>.

The absorption bands between 1400 and 1600 cm<sup>-1</sup> (Figure 3) are very similar to the bands in the starting complex [Ru( $\eta^2$ -OAc)Cl(Triphos)] **9** (Figure 4) indicating a similar chelating binding mode of the acetate ligand.

From NMR-spectroscopy and HRMS it is not possible to discriminate between monomeric  $[(\text{Triphos})\text{Ru}(\eta^2\text{-OAc})(\text{S})]\text{NTf}_2$  **4** and multinuclear species  $[(\text{Triphos})\text{Ru}(\eta^2\text{-OAc})]_x(\text{NTf}_2)_x$ . To make the discrimination possible, an experiment was performed as follows:

$[\text{Ru}(\eta^2\text{-OAc})\text{Cl}(\text{Triphos})]$  **9** (10.3 mg, 12.5  $\mu\text{mol}$ , 1 eq.) and  $[\text{Ru}(\eta^2\text{-OAc})\text{Cl}(\text{Triphos-Anisyl})]$  **10** (12.5 mg, 12.5  $\mu\text{mol}$ , 1 eq.) were weighed into a Schlenk-tube and  $\text{AgNTf}_2$  (11.6 mg, 30  $\mu\text{mol}$ , 2.4 eq.) was added. Toluene (1.5 mL) was added and the solution was stirred at 60 °C for 5 hours. The toluene was removed in vacuo and the residue dissolved in  $d_2\text{-DCM}$  (0.5 mL). The orange solution with a white precipitate was passed through a syringe-filter and analysed by NMR-spectroscopy.

The  $^{31}\text{P}\{^1\text{H}\}$ -NMR spectrum at room temperature showed two singlets at 43.5 and 45.3 ppm in a ratio of nearly 1:1 (Figure 5), indicating the formation of two complexes. The signal at 43.5 ppm was assigned to  $[(\text{Triphos})\text{Ru}(\eta^2\text{-OAc})(\text{S})]\text{NTf}_2$  **4** whereas the signal at 45.3 ppm was assigned to  $[(\text{Triphos-Anisyl})\text{Ru}(\eta^2\text{-OAc})(\text{S})]\text{NTf}_2$  **11**. The absence of further signals due to mixed complexes like  $[\text{Ru}_2(\text{Triphos})(\text{Triphos-Anisyl})(\eta^2\text{-OAc})_2](\text{NTf}_2)_2$  corroborates the monomeric structure of **4**. The  $^1\text{H}$ -NMR spectrum (Figure 6) shows the corresponding proton signals of  $[(\text{Triphos})\text{Ru}(\eta^2\text{-OAc})(\text{S})]\text{NTf}_2$  **4** and  $[(\text{Triphos-Anisyl})\text{Ru}(\eta^2\text{-OAc})(\text{S})]\text{NTf}_2$  **11**.

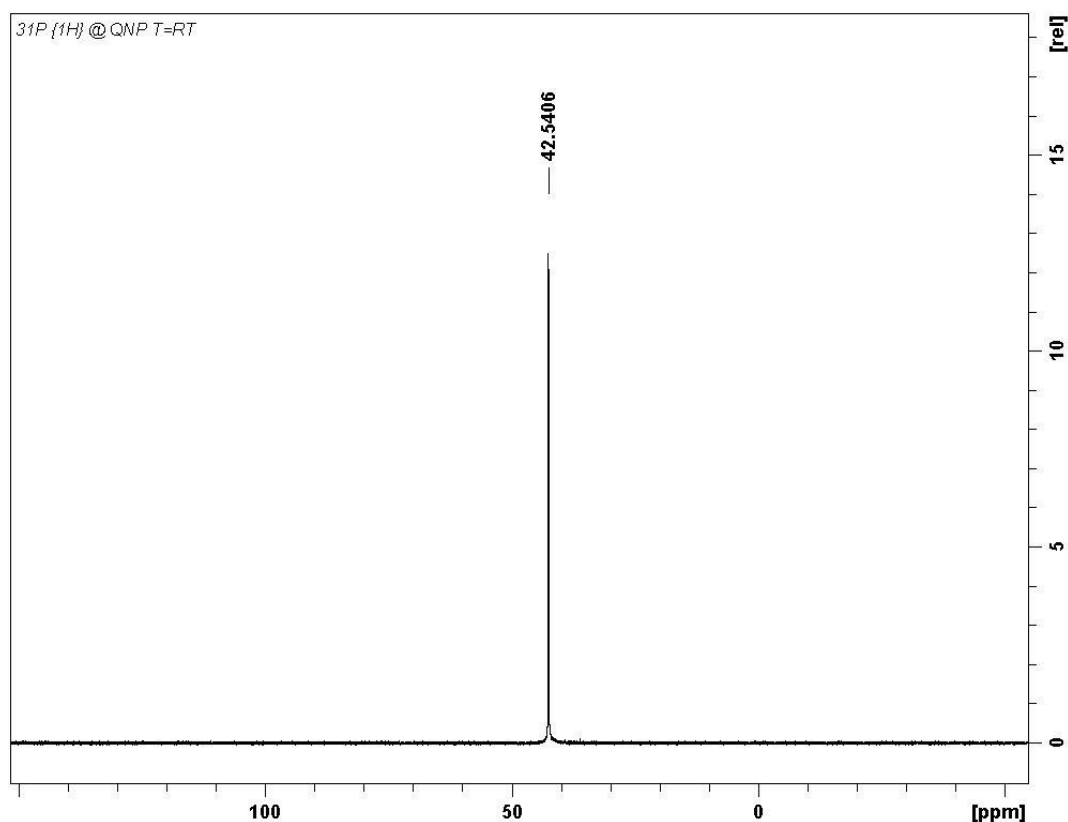

**Figure 1:**  $^{31}\text{P}\{^1\text{H}\}$ -NMR-spectrum ( $d_2\text{-DCM}$ , 243 MHz) of  $[(\text{Triphos})\text{Ru}(\eta^2\text{-OAc})(\text{S})]\text{NTf}_2$  **4**.

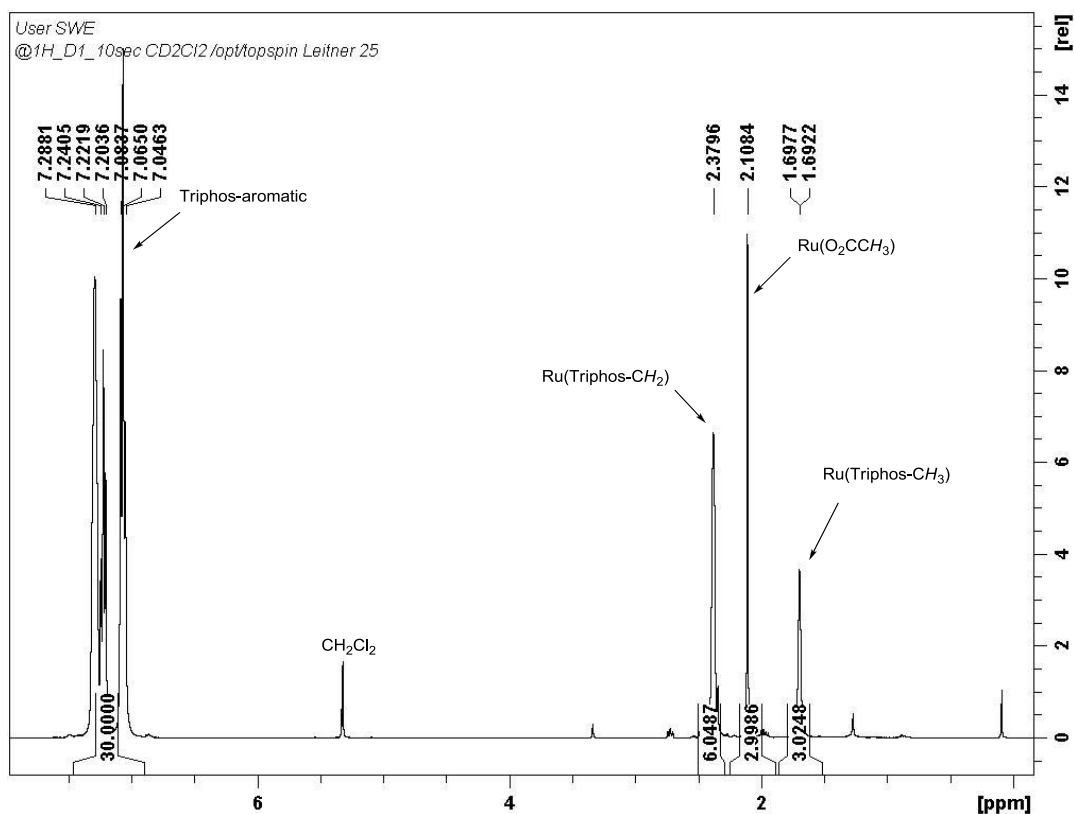

**Figure 2:** <sup>1</sup>H-NMR-spectrum (d<sub>2</sub>-DCM, 400 MHz) of [(Triphos)Ru(η<sup>2</sup>-OAc)(S)]NTf<sub>2</sub> 4.

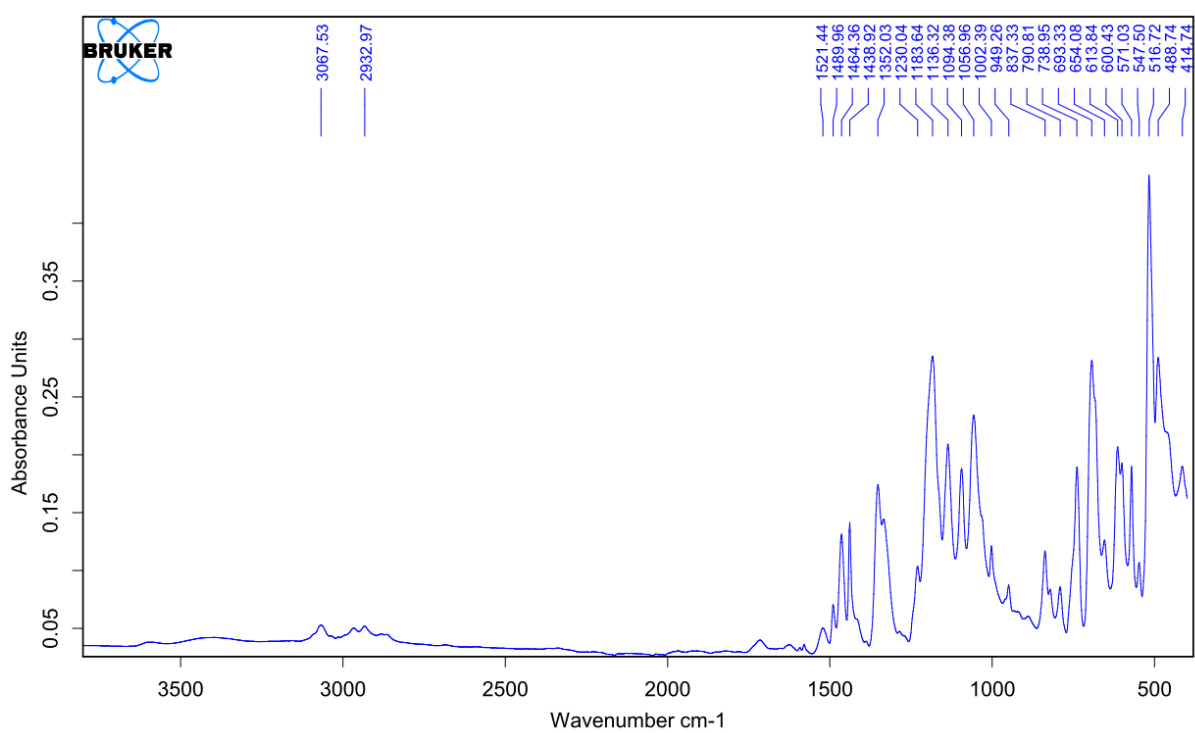

**Figure 3:** ATR-IR spectrum of [(Triphos)Ru(η<sup>2</sup>-OAc)(S)]NTf<sub>2</sub> 4.

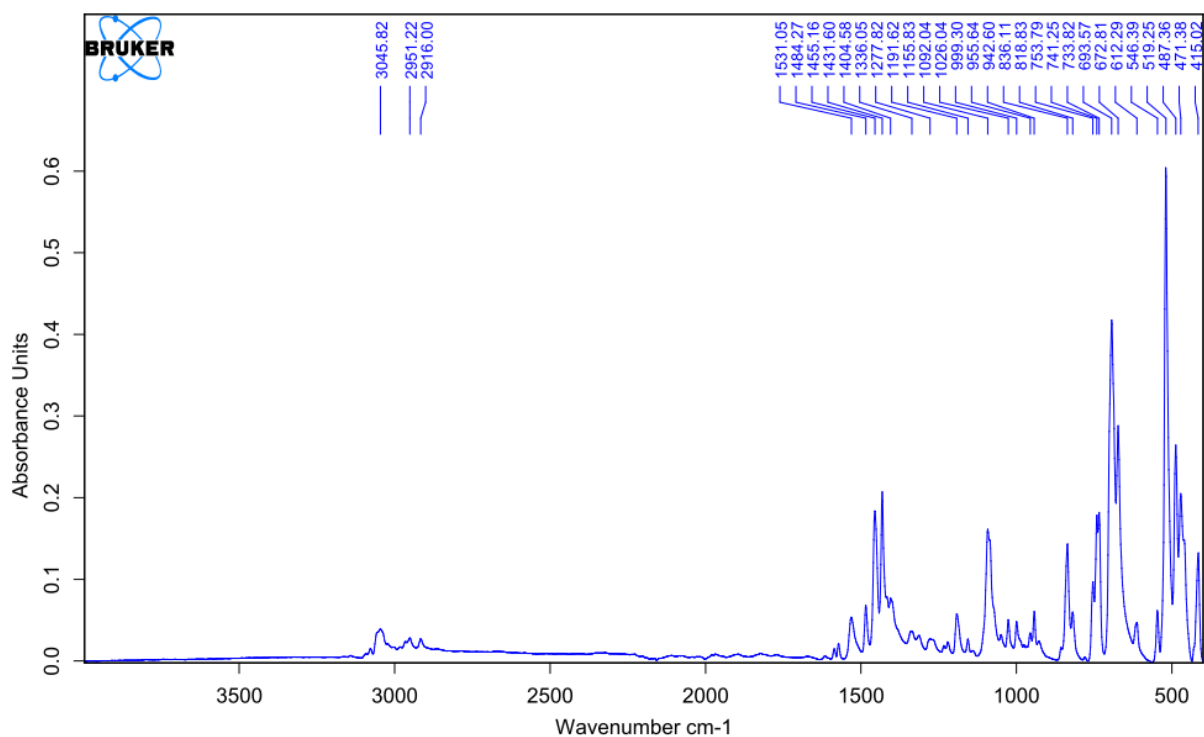

**Figure 4:** ATR-IR spectrum of the starting material  $[\text{Ru}(\eta^2\text{-OAc})\text{Cl}(\text{Triphos})]$  **9**.

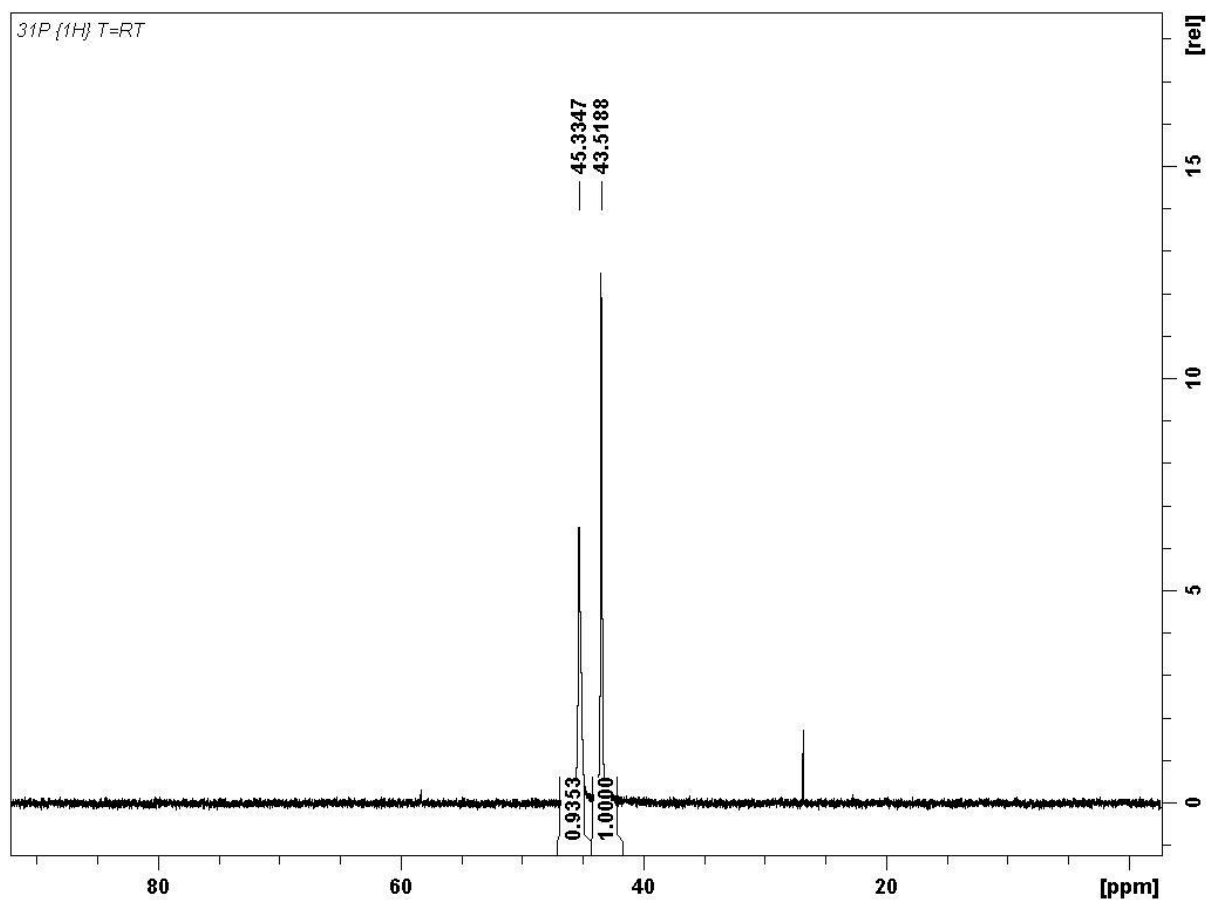

**Figure 5:**  $^{31}\text{P}\{^1\text{H}\}$ -NMR ( $d_2$ -DCM) of the reaction of  $[\text{Ru}(\eta^2\text{-OAc})\text{Cl}(\text{Triphos})]$  **9** and  $[\text{Ru}(\eta^2\text{-OAc})\text{Cl}(\text{Triphos-Anisyl})]$  **10** (1 eq.) with  $\text{AgNTf}_2$  (2.4 eq.) in one pot.

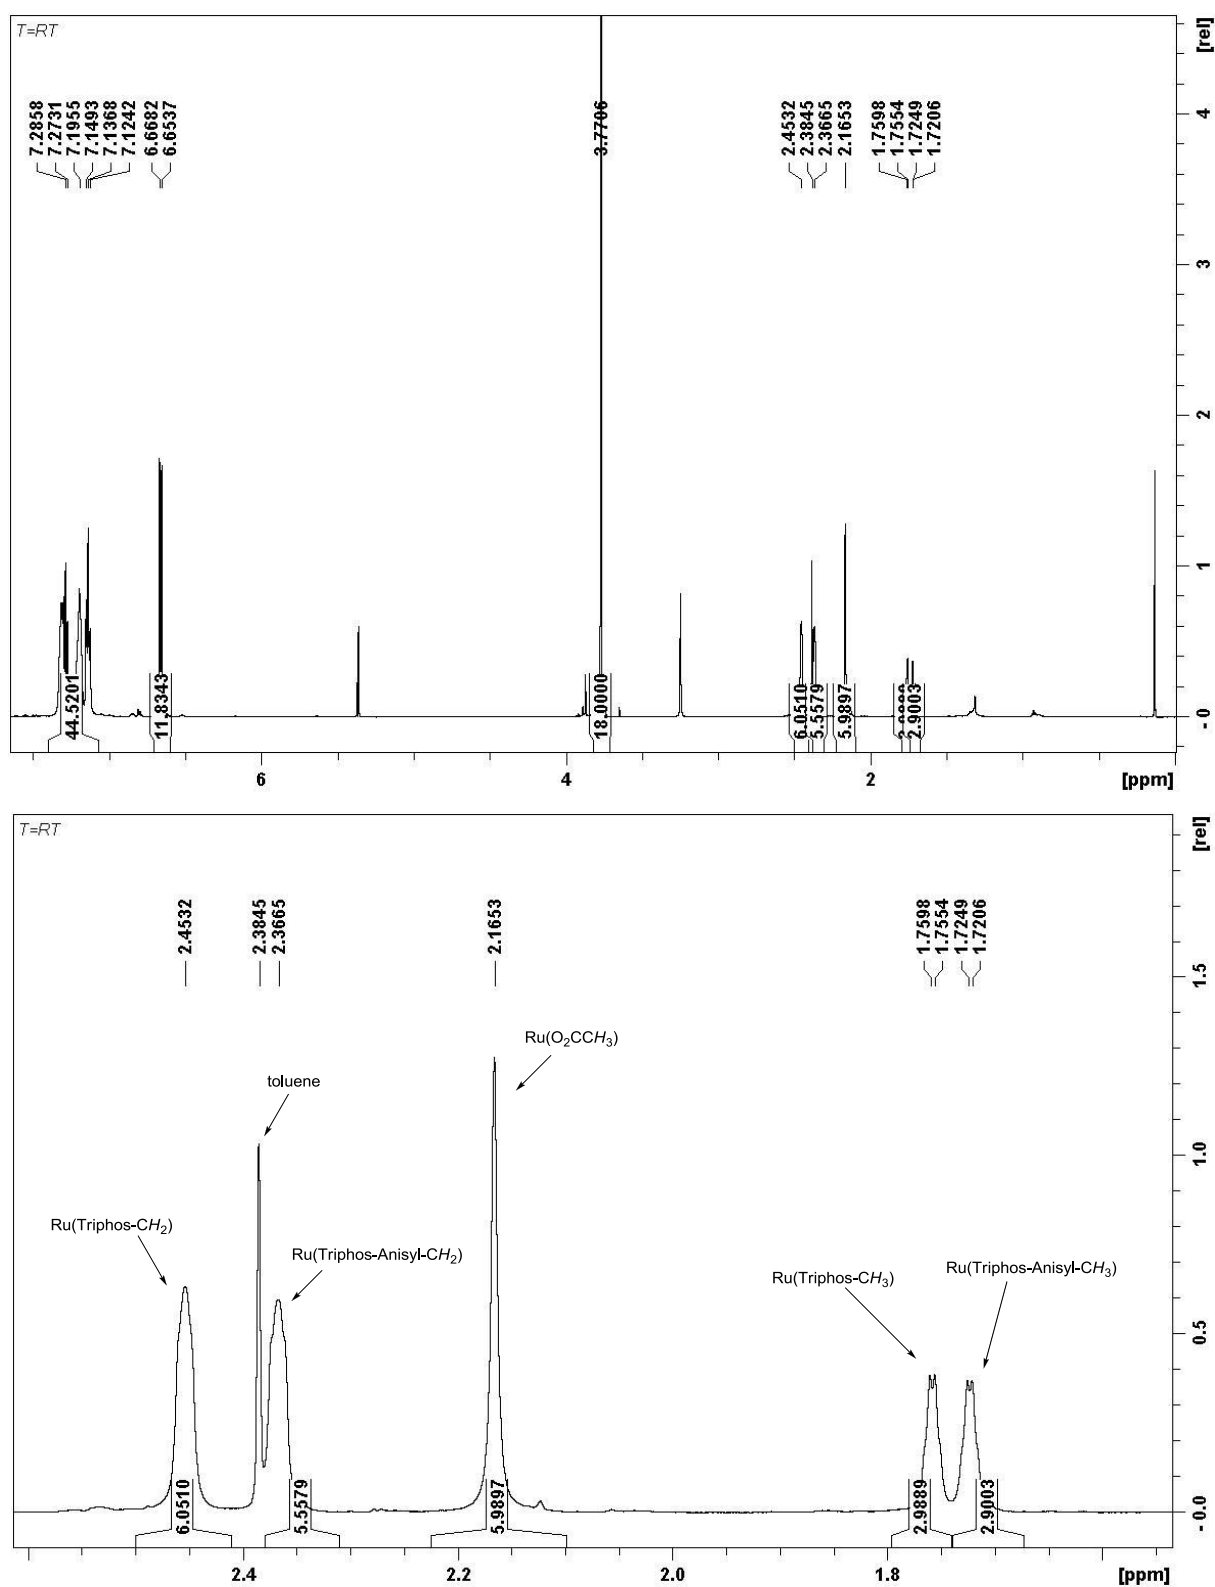

**Figure 6:** <sup>1</sup>H-NMR-spectra (*d*<sub>2</sub>-DCM) of the reaction of [Ru( $\eta^2$ -OAc)Cl(Triphos)] **9** and [Ru( $\eta^2$ -OAc)Cl(Triphos-Anisyl)] **10** (1 eq.) with AgNTf<sub>2</sub> (2.4 eq.). Top: full spectrum. Bottom: zoom of the region 1.5-2.6 ppm.



### 3 Synthesis of 1,1,1-tris{bis(4-methoxyphenyl)phosphinomethyl}ethan (Triphos-Anisyl) **15**

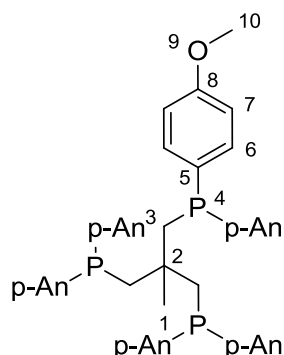

Potassium-tert-butoxide (202 mg, 1.80 mmol, 3.6 eq.) and bis(4-methoxyphenyl)phosphin (369 mg, 1.50 mmol, 1.5 eq.) were dissolved in DMSO (7 mL) and stirred for 0.5 h resulting in a red coloured solution. To this solution, a solution of 1,1,1-tris(chloromethyl)ethan (85 mg, 0.5 mmol, 1 eq.) in DMSO (5 mL) was added slowly over 5 min. The reaction solution was stirred at 60 °C over night during which a decolourisation occurred. Water (20 mL) was added carefully and the resulting emulsion was extracted with diethylether (5×10 mL). The solvent was removed from the extract in vacuo and the product **15** was obtained as a colourless solid (380 mg, 95 %). NMR-spectra of **15** are shown in Figures 7 and 8.

$^1\text{H-NMR}$  (400 MHz,  $\text{CDCl}_3$ , rt):  $\delta = 7,22\text{-}7,15$  (m, 12 H,  $\text{C}^6\text{-H}$ ),  $6,74\text{-}6,68$  (m, 12 H,  $\text{C}^7\text{-H}$ ),  $3,69$  (s, 18 H,  $\text{C}^{10}\text{-H}_3$ ),  $2,26$  (bs, 6 H,  $\text{C}^3\text{-H}_2$ ),  $0,85$  (s, 3 H,  $\text{C}^1\text{-H}_3$ ) ppm.

$^{13}\text{C-NMR}$  (101 MHz,  $\text{CDCl}_3$ , rt):  $\delta = 158,7$  (s,  $\text{C}^8$ ),  $133,2$  (m,  $\text{C}^6$ ),  $130,0$  (m,  $\text{C}^5$ ),  $112,8$  (m,  $\text{C}^7$ ),  $54,0$  (s,  $\text{C}^{10}$ ),  $42,5$  (m,  $\text{C}^1$ ),  $37,7$  (m,  $\text{C}^2$ ),  $28,4$  (m,  $\text{C}^3$ ) ppm.

$^{31}\text{P-NMR}$  (162 MHz,  $\text{CDCl}_3$ , rt):  $\delta = -29,9$  ppm.

ESI-MS (MeOH) positive ion:  $m/z = 805.4$  ( $\text{M}+1$ ).

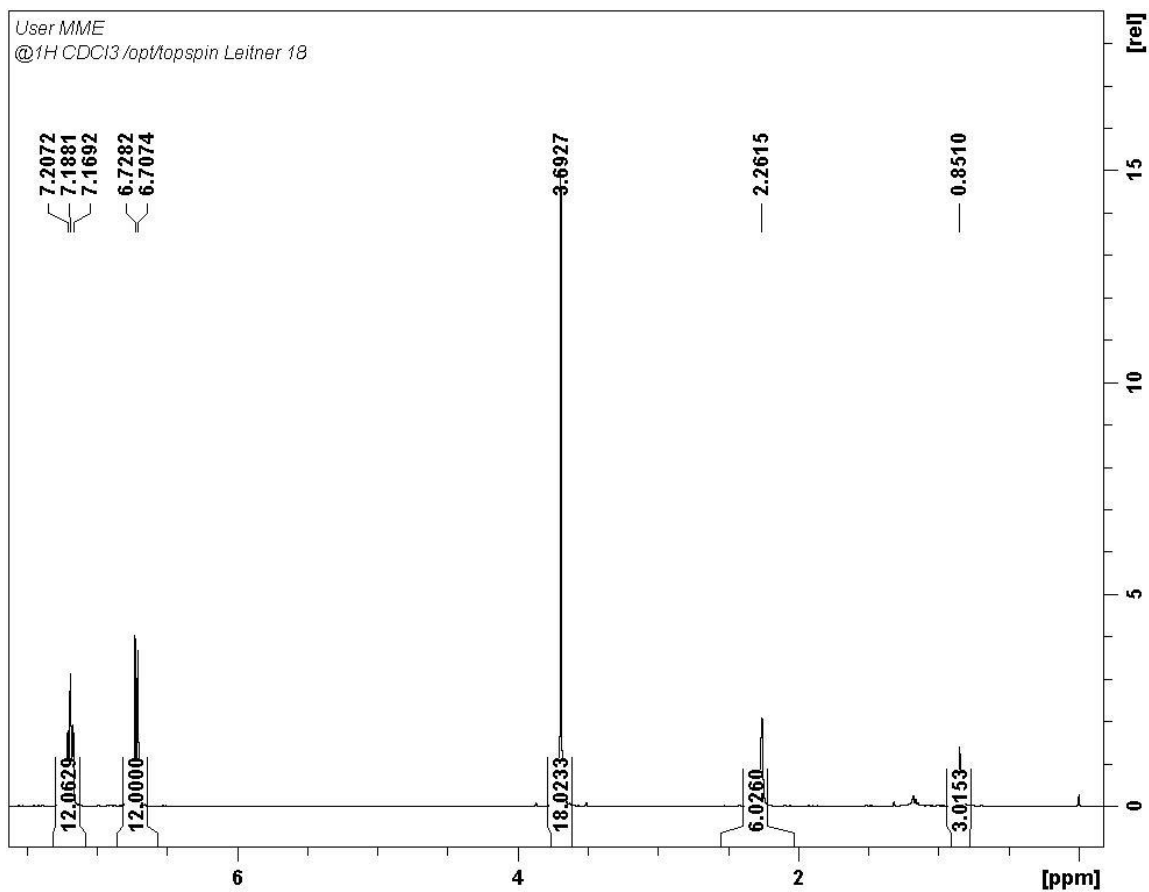

**Figure 7:**  $^1\text{H}$ -NMR-spectrum ( $\text{CDCl}_3$ , 400 MHz) of Triphos-Anisyl 15.

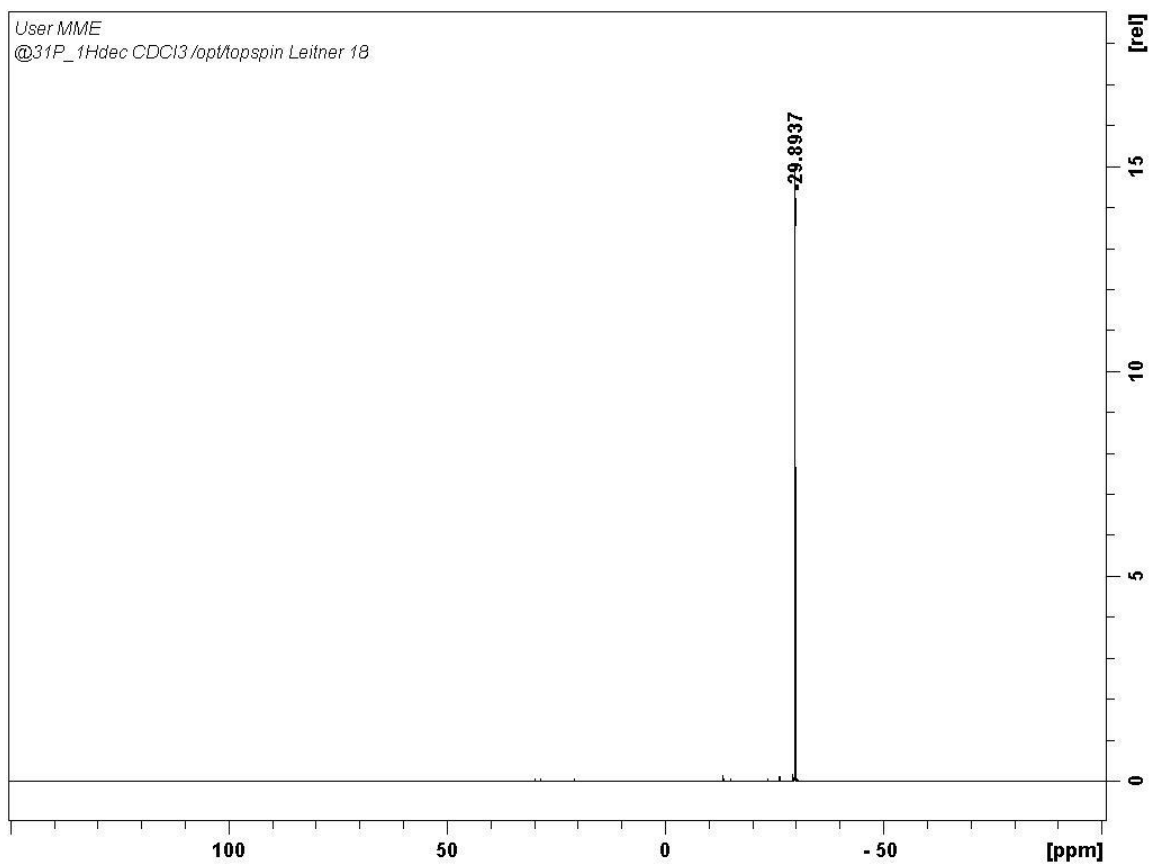

**Figure 8:**  $^{31}\text{P}\{^1\text{H}\}$ -NMR-spectrum ( $\text{CDCl}_3$ , 400 MHz) of Triphos-Anisyl 15.

## 4 Synthesis of [Ru( $\eta^2$ -OAc)Cl(Triphos-Anisyl)] **10**

[Ru( $\eta^2$ -OAc)Cl(Triphos-Anisyl)] **10** was synthesised like the analogous complex [Ru( $\eta^2$ -OAc)Cl(Triphos)] **9**.<sup>[2]</sup>

Ru(PPh<sub>3</sub>)<sub>3</sub>( $\eta^2$ -OAc)Cl (98.2 mg, 0.1 mmol) and Triphos-Anisyl **15** (80.5 mg, 0.1 mmol, 1 eq.) were dissolved in toluene (9 mL) and the solution stirred and heated at 110 °C for 3 h. During this time, the solution becomes yellow. The solution was cooled to room temperature and after addition of pentane (5 mL) a yellow solid precipitated. After decantation of the supernatant the yellow solid was washed with pentane (3×10 mL) and dried in vacuum (76 mg, yield = 76 %).

<sup>1</sup>H-NMR (600 MHz, *d*<sub>8</sub>-THF, rt):  $\delta$  = 7.53 – 6.58 (m, 24H, C<sub>Ar</sub>-H), 3.73 (s, 18H, Ar-OCH<sub>3</sub>), 2.17 (br, 6H, P-CH<sub>2</sub>), 1.94 (s, 3H, O<sub>2</sub>CCH<sub>3</sub>), 1.46 (br qua, *J*<sub>H-P</sub> = 2.0 Hz, 3H, CH<sub>3</sub>) ppm.

<sup>13</sup>C{<sup>1</sup>H}-NMR (151 MHz, *d*<sub>8</sub>-THF, rt):  $\delta$  = 186.2 (s, O<sub>2</sub>CCH<sub>3</sub>), 160.5 (s, C<sub>Ar</sub>-OCH<sub>3</sub>), 134.2 (s, C<sub>Ar</sub>), 113.3 (s, C<sub>Ar</sub>-H), 55.5 (s, O-CH<sub>3</sub>), 38.3 [s, (An<sub>2</sub>PCH<sub>2</sub>)<sub>3</sub>C-CH<sub>3</sub>], 37.9 [qua, *J*<sub>C-P</sub> = 10.2 Hz, (An<sub>2</sub>PCH<sub>2</sub>)<sub>3</sub>C-CH<sub>3</sub>], 33.5 (br, P-CH<sub>2</sub>), 25.8 (m, O<sub>2</sub>CCH<sub>3</sub>) ppm.

<sup>31</sup>P{<sup>1</sup>H}-NMR (243 MHz, *d*<sub>2</sub>-DCM, rt):  $\delta$  = 38.8 (br, 2P), 34.5 (br, 1P) ppm.

ESI-HRMS (THF) positive ion: [Ru( $\eta^2$ -OAc)(Triphos-Anisyl)]<sup>+</sup> calculated: *m/z* = 965.20750; determined: *m/z* = 965.20648.

ATR-IR:  $\tilde{\nu}$  = 3100-2900 (w), 2834 (w), 1593 (m), 1570 (m), 1531 (w), 1500 (m), 1454 (m), 1404 (m), 1288 (m), 1245 (s), 1180 (s), 1089 (s), 1028 (m), 942 (w), 844 (w), 822 (m), 797 (s), 745 (w), 722 (w), 674 (m), 622 (m), 540 (s), 525 (m), 497 (m), 465 (m), 432 (w), 418 (m) cm<sup>-1</sup>.

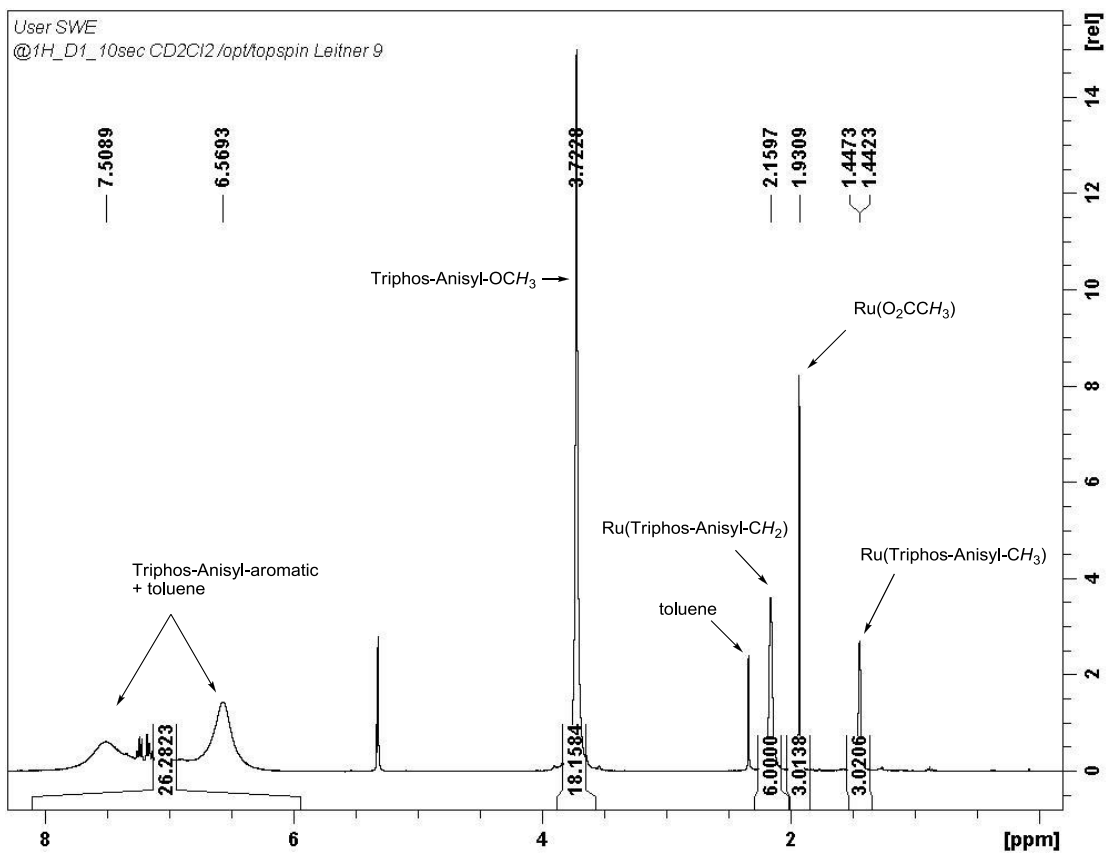

**Figure 9:** <sup>1</sup>H-NMR-spectrum (*d*<sub>2</sub>-DCM, 400 MHz) of [Ru(η<sup>2</sup>-OAc)Cl(Triphos-Anisyl)] **10**.

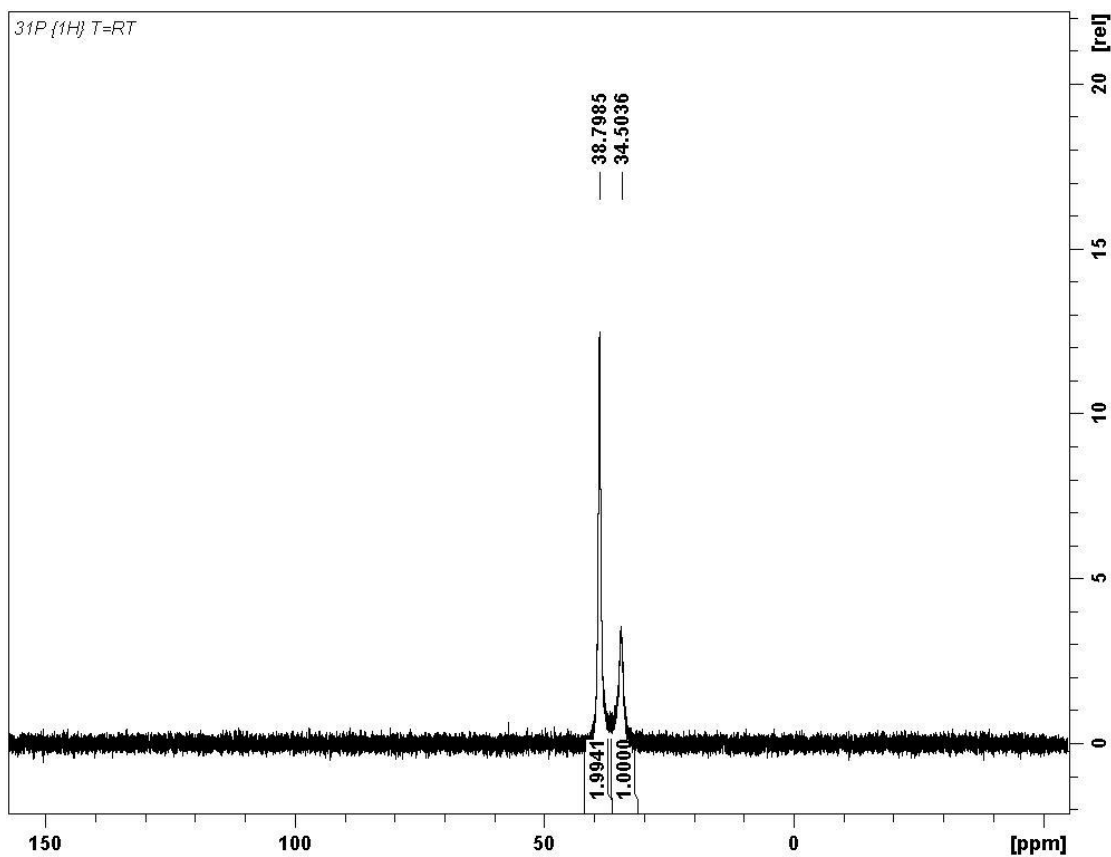

**Figure 10:** <sup>31</sup>P{<sup>1</sup>H}-NMR-spectrum (*d*<sub>2</sub>-DCM, 243 MHz) of [Ru(η<sup>2</sup>-OAc)Cl(Triphos-Anisyl)] **10**.

## 5 General procedure for CO<sub>2</sub> hydrogenation experiments

All high pressure batch experiments were conducted in stainless steel autoclaves (inner volume = 13 mL) equipped with a glass inlet and a magnetic stir bar. Prior to use, the autoclave was evacuated and repeatedly purged with argon. Under an argon atmosphere, catalyst **2** (0.025 mmol), together with HNTf<sub>2</sub> (1 eq.) was weighed into a Schlenk tube and dissolved in THF (2.08 mL). Alternatively, a THF solution of catalyst **4** (0.025 mmol) was prepared by heating [Ru( $\eta^2$ -OAc)Cl(Triphos)] **9** (0.025 mmol, 20.5 mg) together with AgNTf<sub>2</sub> (1.1 eq., 0.0275 mmol, 10.7 mg) in 1 mL of THF for 3 h at 60 °C. The solution was filtrated over silica and the silica washed with 1 mL of THF. Alternatively, isolated catalyst **4** (0.025 mmol) could be used in THF (2.08 mL) and gave the same results.

In either case the solution was transferred via cannula to a stainless steel autoclave under argon atmosphere. The autoclave was pressurised with carbon dioxide to 20 bar and then hydrogen was added up to a total pressure of 80 bar. The reaction mixture was stirred and heated at 140 °C in an oil bath giving a total pressure of about 120 bar. After 24 h, the autoclave was cooled to 0 °C in an ice bath and then carefully vented. The resulting clear solution was analysed by <sup>1</sup>H-NMR (D1 = 10 s) in *d*<sub>6</sub>-DMSO with internal standard mesitylene and the results confirmed by gas chromatography using heptane as internal standard. Figure 11 shows a representative <sup>1</sup>H-NMR spectrum and Figure 12 a representative GC chromatogram.

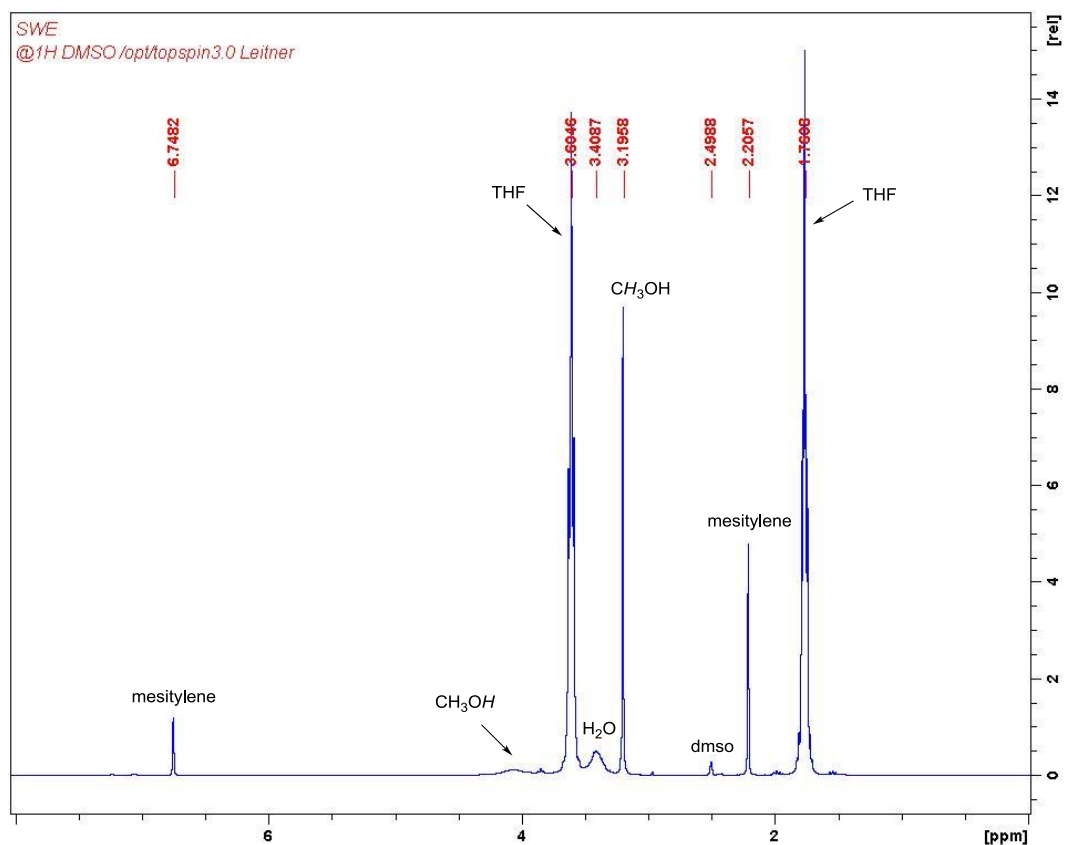

**Figure 11:** <sup>1</sup>H-NMR (300 MHz, *d*<sub>6</sub>-dmsol) spectrum of the reaction solution from a CO<sub>2</sub> hydrogenation reaction using above described standard protocol (internal standard mesitylene).

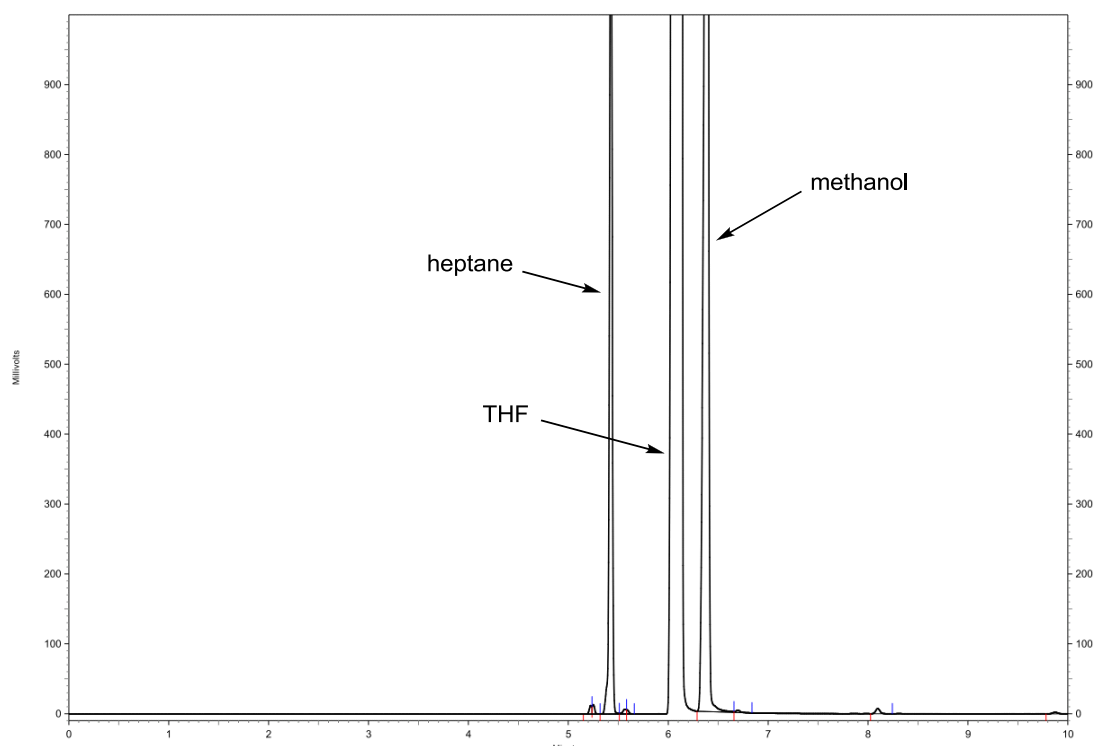

**Figure 12:** Representative gas chromatogram of the reaction solution from a CO<sub>2</sub> hydrogenation reaction using above described standard protocol (internal standard heptane).

## 6 Spectroscopic investigations

### 6.1 NMR-spectroscopic analysis of the reaction mixture using complex **2** together with HNTf<sub>2</sub>

A CO<sub>2</sub>-hydrogenation reaction was performed under routine conditions (25 μmol complex **2**, 1 equivalent HNTf<sub>2</sub>, 2.08 mL *d*<sub>8</sub>-THF, *p*(CO<sub>2</sub>) = 20 bar at r.t., *p*(H<sub>2</sub>) = 60 bar at r.t., 140 °C) and terminated after 1 hour. The reaction solution was analysed via NMR. Figure 13 shows the <sup>31</sup>P{<sup>1</sup>H}-NMR spectrum at -40 °C and the assigned complex structures. Figure 14 shows the <sup>1</sup>H-NMR-Spectrum which shows the signal due to coordinated formate in **3a** at 8.7 ppm, as well as the hydride signals of [(Triphos)RuH(CO)<sub>2</sub>]<sup>+</sup> **5** and [Ru<sub>2</sub>(μ-H)<sub>2</sub>(Triphos)<sub>2</sub>] **6**. In Figure 15 the [<sup>31</sup>P,<sup>1</sup>H]-HMBC spectrum at -40 °C is depicted which shows the signal due to the coordinated formate in [(Triphos)Ru(η<sup>2</sup>-O<sub>2</sub>CH)(THF)]<sup>+</sup> **3a**. Figure 16 depicts the [<sup>13</sup>C,<sup>1</sup>H]-HMQC spectrum which also shows the signal due to the coordinated formate.

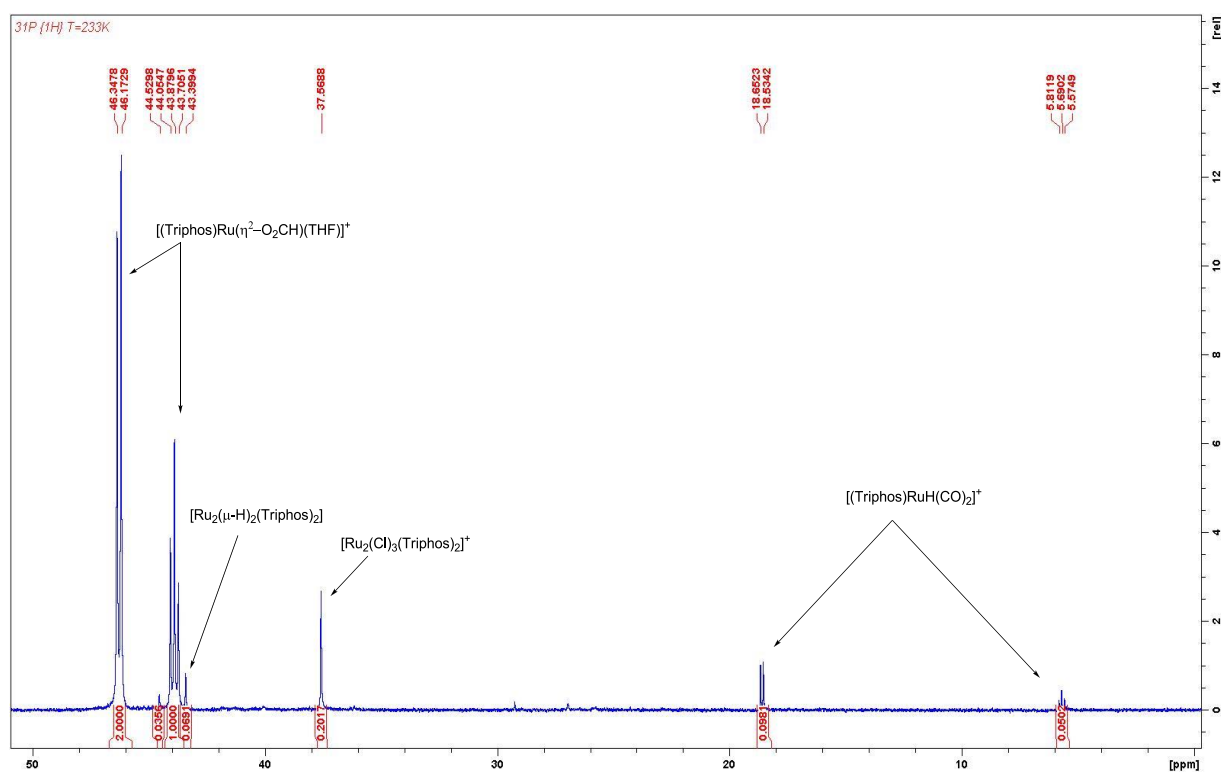

**Figure 13:** <sup>31</sup>P{<sup>1</sup>H}-NMR (243 MHz, *d*<sub>8</sub>-THF, -40 °C) spectrum of the reaction solution of a CO<sub>2</sub>-hydrogenation reaction (25 μmol complex **2**, 1 equivalent HNTf<sub>2</sub>, 2.08 mL *d*<sub>8</sub>-THF, *p*(CO<sub>2</sub>) = 20 bar at r.t., *p*(H<sub>2</sub>) = 60 bar at r.t., 140 °C, 1 h reaction time).

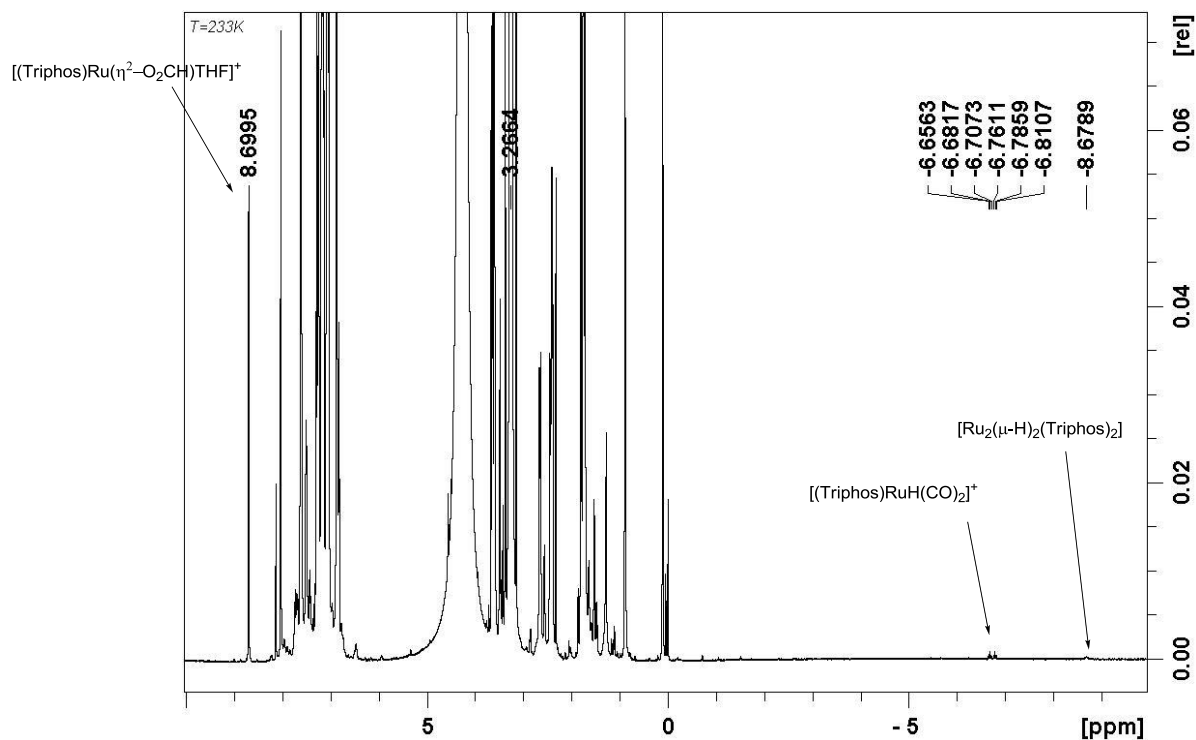

**Figure 14:**  $^1\text{H-NMR}$  (600 MHz,  $d_8$ -THF,  $-40\text{ }^\circ\text{C}$ ) spectrum of the reaction solution of a  $\text{CO}_2$ -hydrogenation reaction (25  $\mu\text{mol}$  complex **2**, 1 equivalent  $\text{HNTf}_2$ , 2.08 mL  $d_8$ -THF,  $p(\text{CO}_2) = 20\text{ bar}$  at r.t.,  $p(\text{H}_2) = 60\text{ bar}$  at r.t.,  $140\text{ }^\circ\text{C}$ , 1 h reaction time).

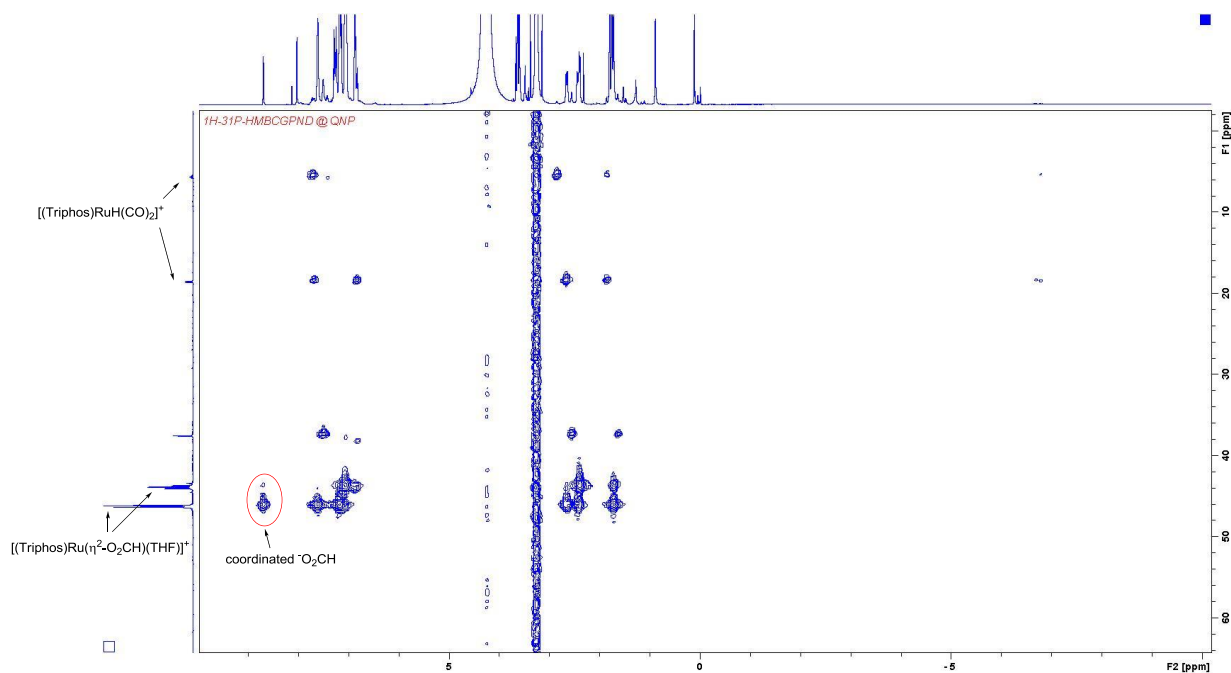

**Figure 15:**  $^{31}\text{P}, ^1\text{H-HMBC}$  (600 MHz,  $d_8$ -THF,  $-40\text{ }^\circ\text{C}$ ) spectrum of the reaction solution of a  $\text{CO}_2$ -hydrogenation reaction (25  $\mu\text{mol}$  complex **2**, 1 equivalent  $\text{HNTf}_2$ , 2.08 mL  $d_8$ -THF,  $p(\text{CO}_2) = 20\text{ bar}$  at r.t.,  $p(\text{H}_2) = 60\text{ bar}$  at r.t.,  $140\text{ }^\circ\text{C}$ , 1 h reaction time).



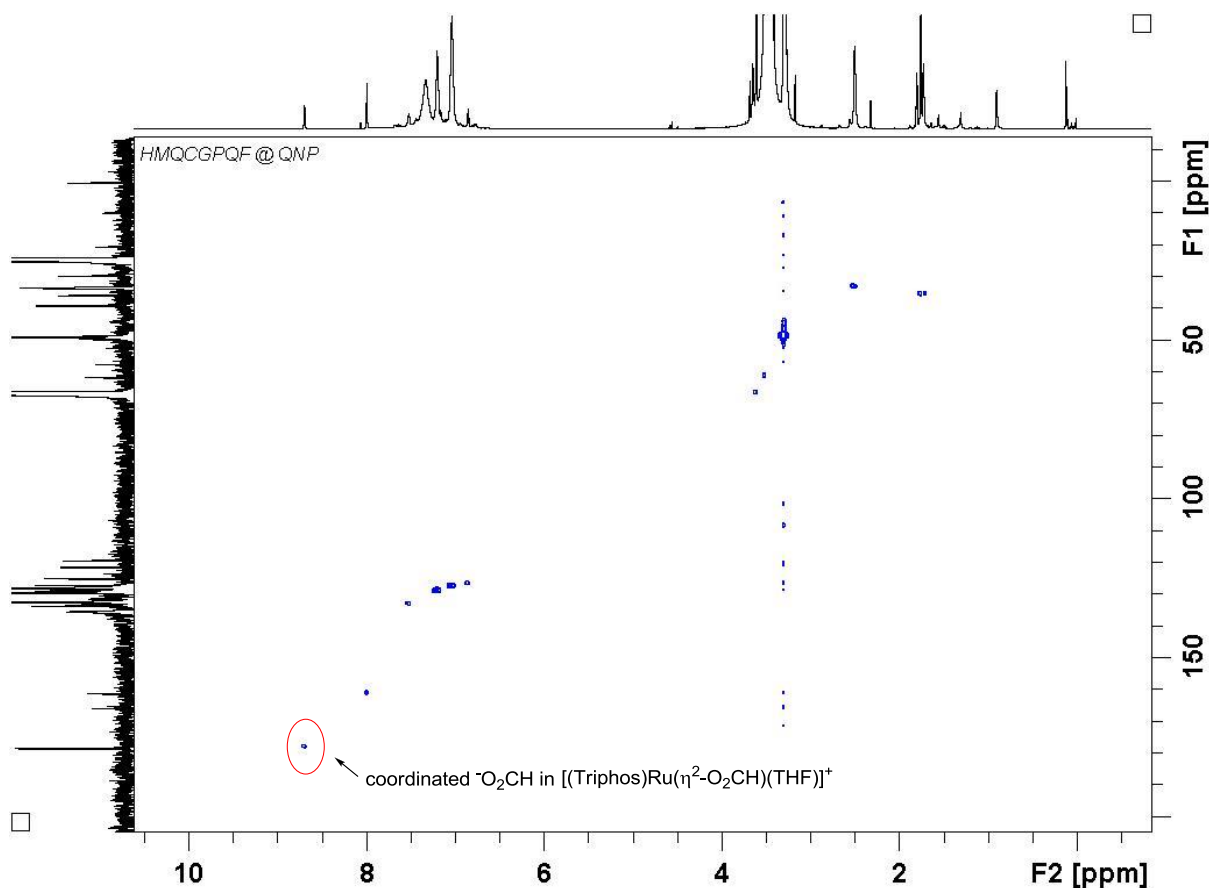

**Figure 16:** [ $^{13}\text{C}$ ,  $^1\text{H}$ ]-HMQC (600 MHz,  $d_8$ -THF,  $-40\text{ }^\circ\text{C}$ ) spectrum of the reaction solution of a  $\text{CO}_2$ -hydrogenation reaction (25  $\mu\text{mol}$  complex **2**, 1 equivalent  $\text{HNTf}_2$ , 2.08 mL  $d_8$ -THF,  $p(\text{CO}_2) = 20$  bar at r.t.,  $p(\text{H}_2) = 60$  bar at r.t.,  $140\text{ }^\circ\text{C}$ , 1 h reaction time).

## 6.2 Generation and analysis of the formate complex **3**

$\text{HNTf}_2$  (7.0 mg, 0.025 mmol) was dissolved in  $d_8$ -THF (0.5 mL) and added to complex **2** (19.5 mg, 0.025 mmol, 1 eq.) in  $d_8$ -THF (0.5 mL) at room temperature giving a deep red coloured solution.  $\text{HCO}_2\text{H}$  (0.9  $\mu\text{L}$ , 0.025 mmol, 1 eq.) was added via micro-syringe and the solution became orange. The solution was analysed via NMR-spectroscopy (Figures 17-19). The same formate species **3a** as observed in the  $\text{CO}_2$  hydrogenation reaction was detected. The transmission IR-spectrum recorded in  $d_8$ -THF solution (Figure 20) showed a  $\nu_{\text{CO}_{\text{asym}}}$  stretching mode at  $1543\text{ cm}^{-1}$ , a typical value for  $\eta^2$ -coordinated formate. After addition of acetonitrile (0.1 mL) the solution was again analysed by NMR-spectroscopy. The  $^{31}\text{P}\{^1\text{H}\}$ -NMR showed new signals due to the formation of complexes bearing the MeCN ligand. The assignment of the signals to structures is shown in Figure 21. The signals due to  $[(\text{Triphos})\text{Ru}(\text{MeCN})_2\text{H}]^+$  **8**, which increased over time, indicate reversibility of the  $\text{CO}_2$  insertion. The corresponding  $^1\text{H}$ -NMR spectra are shown in Figure 22.

NMR-Data of [(Triphos)Ru( $\eta^2$ -O<sub>2</sub>CH)(THF)][NTf<sub>2</sub>] **3a**:

<sup>1</sup>H-NMR (600 MHz, *d*<sub>8</sub>-THF, -40 °C):  $\delta$  = 8.75 (br, 1H, O<sub>2</sub>CH), 7.60 – 6.90 (m, 30H, C<sub>Ar</sub>-H), 3.60 (br, THF), 2.69 (d, *J*<sub>H-P</sub> = 15.6 Hz, 2H, P-CH<sub>2</sub>), 2.47 (d, *J*<sub>H-P</sub> = 15.6 Hz, 2H, P-CH<sub>2</sub>), 2.43 (d, *J*<sub>H-P</sub> = 9.6 Hz, 2H, P-CH<sub>2</sub>), 1.76 (br, THF), 1.75 [br, 3H, (Ph<sub>2</sub>PCH<sub>2</sub>)<sub>3</sub>C-CH<sub>3</sub>] ppm.

<sup>31</sup>P{<sup>1</sup>H}-NMR (243 MHz, *d*<sub>8</sub>-THF, -40 °C):  $\delta$  = 47.1 (d, *J*<sub>P-P</sub> = 42.4 Hz, 2P), 44.2 (t, *J*<sub>P-P</sub> = 42.4 Hz, 1P) ppm.

<sup>13</sup>C{<sup>1</sup>H}-NMR (151 MHz, *d*<sub>8</sub>-THF, rt):  $\delta$  = 178.4 (s, O<sub>2</sub>CH), 135.4 (s, C<sub>Ar</sub>), 132.3 (s, C<sub>Ar</sub>-H), 129.3 (s, C<sub>Ar</sub>-H), 127.8 (s, C<sub>Ar</sub>-H), 120.3 (qua, *J*<sub>C-F</sub> = 322 Hz, CF<sub>3</sub>), 66.4 (m, THF), 39.3 [s, (Ph<sub>2</sub>PCH<sub>2</sub>)<sub>3</sub>C-CH<sub>3</sub>], 35.7 (m, CH<sub>3</sub>), 33.8 (br, P-CH<sub>2</sub>), 24.4 (m, THF) ppm.

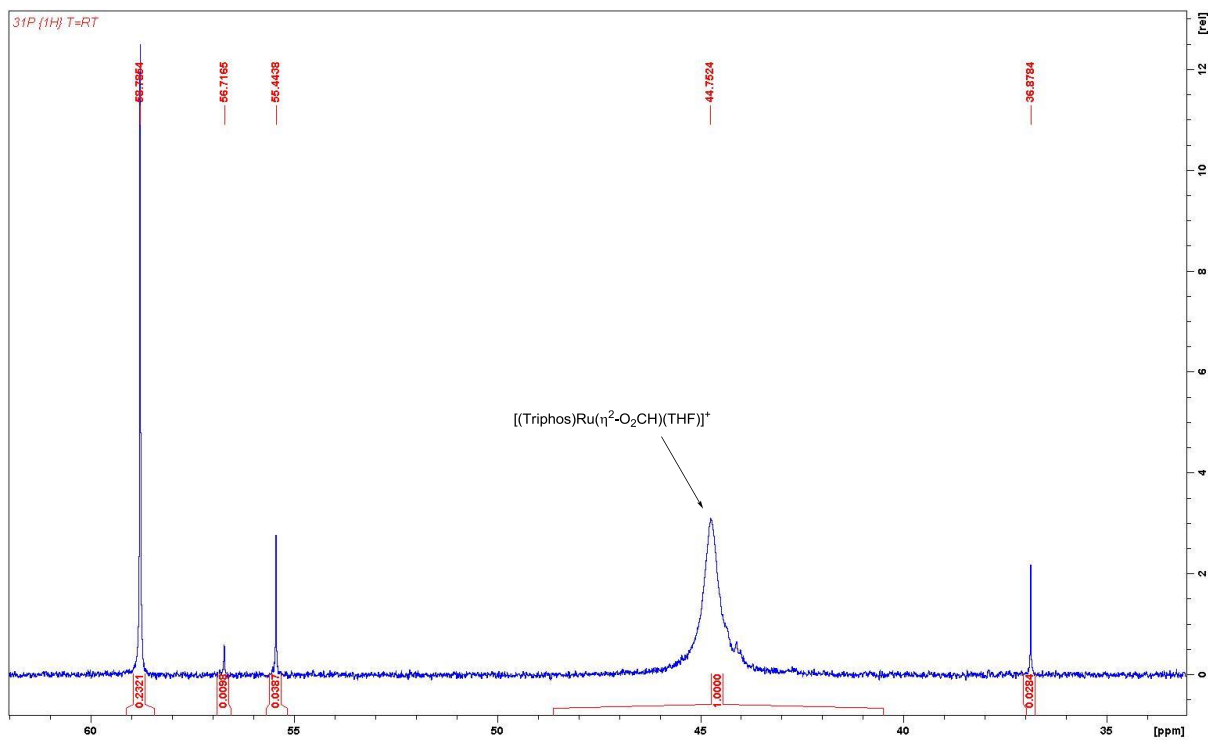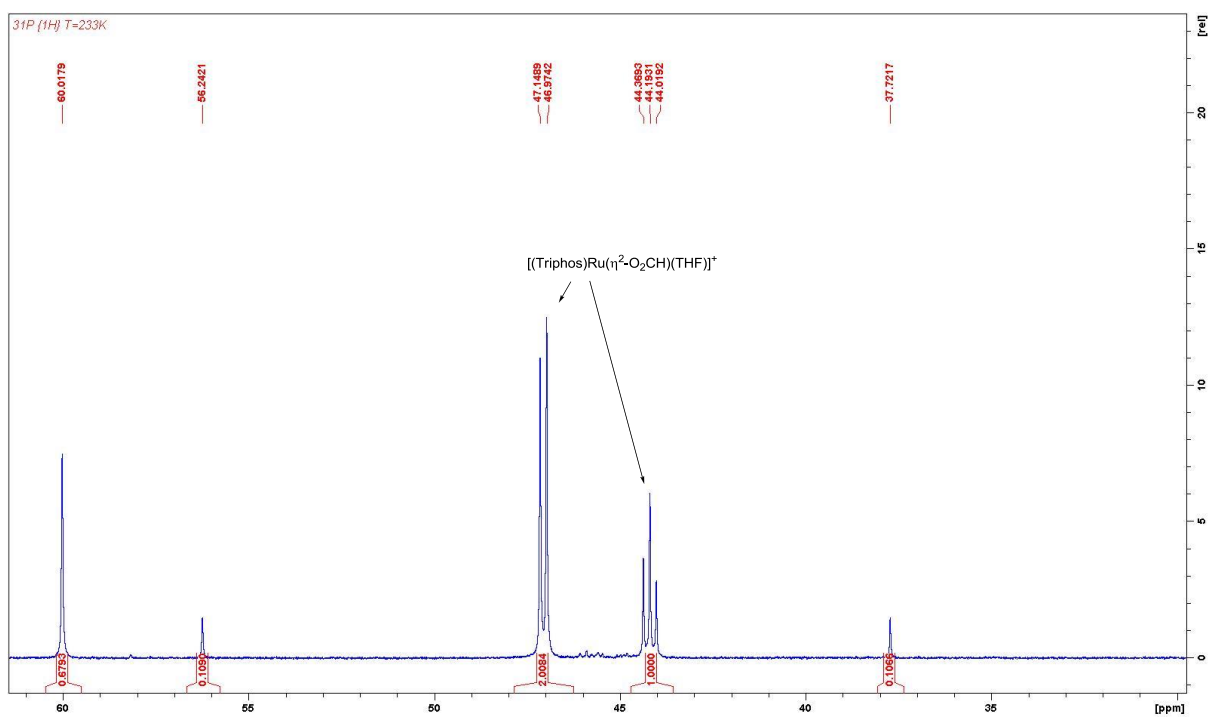

**Figure 17.**  $^{31}\text{P}\{^1\text{H}\}$ -NMR (243 MHz,  $d_8$ -THF) spectrum after addition of 1 equivalent  $\text{HNTf}_2$  and 1 equivalent  $\text{HCO}_2\text{H}$  to complex **2** in  $d_8$ -THF. Top: at room temperature, bottom at  $-40^\circ\text{C}$ .

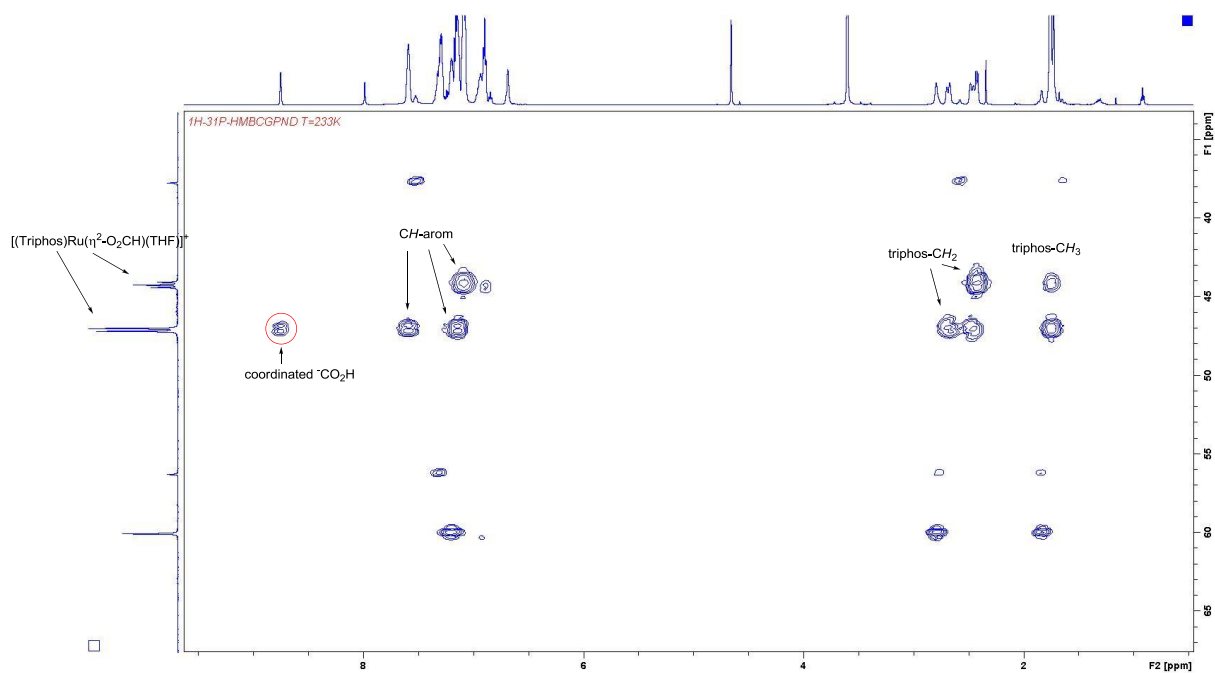

**Figure 18:**  $[^{31}\text{P},^1\text{H}]$ -HMBC (600 MHz,  $d_8$ -THF,  $-40\text{ }^\circ\text{C}$ ) spectrum after addition of 1 equivalent  $\text{HNTf}_2$  and 1 equivalent  $\text{HCO}_2\text{H}$  to complex **2** in  $d_8$ -THF.

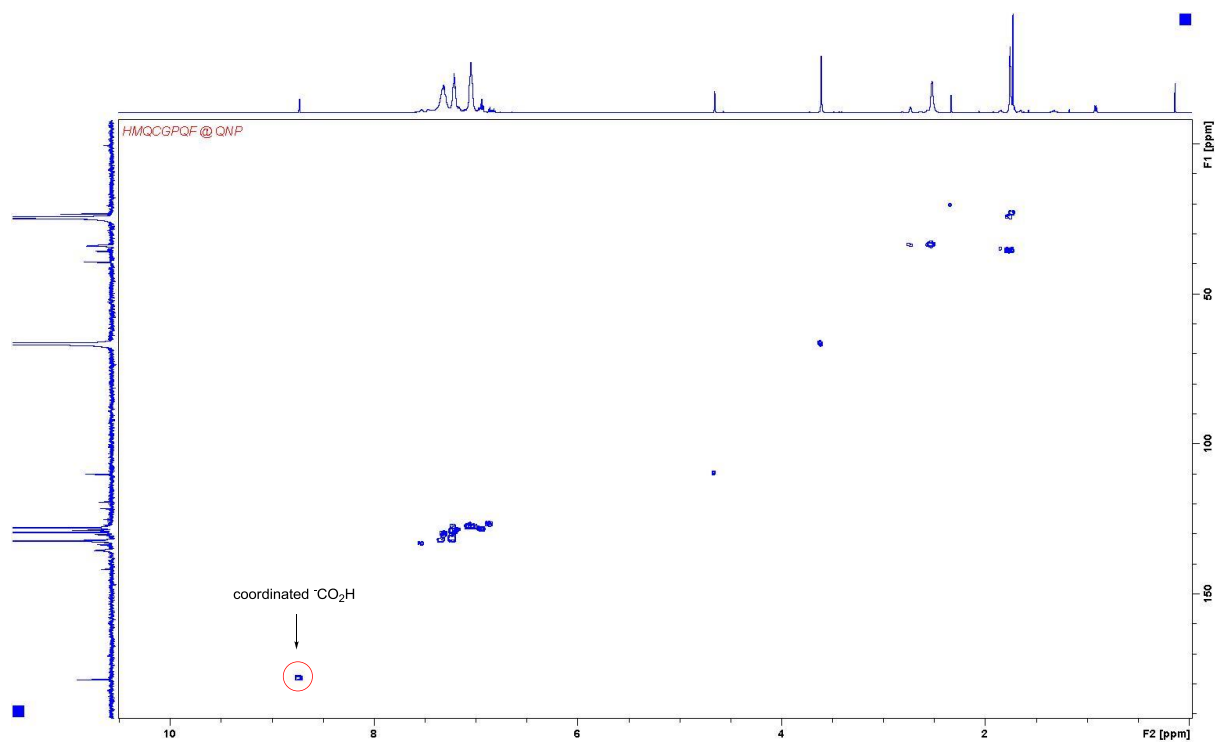

**Figure 19:**  $[^{13}\text{C},^1\text{H}]$ -HSQC (600 MHz,  $d_8$ -THF,  $-40\text{ }^\circ\text{C}$ ) spectrum after addition of 1 equivalent  $\text{HNTf}_2$  and 1 equivalent  $\text{HCO}_2\text{H}$  to complex **2** in  $d_8$ -THF.

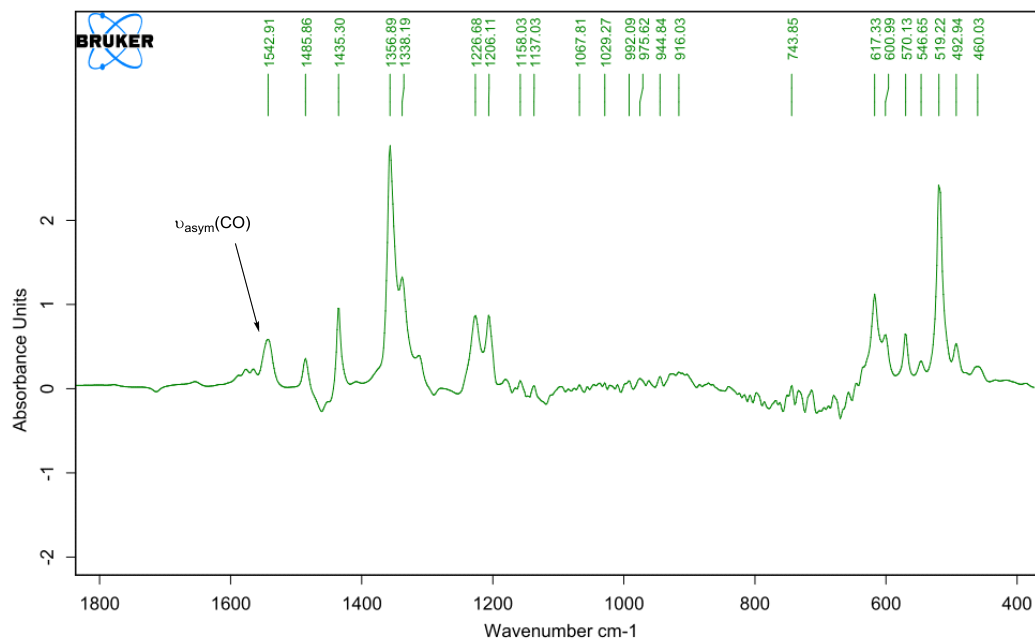

**Figure 20:** IR spectrum (transmission) after addition of 1 equivalent HNTf<sub>2</sub> and 1 equivalent HCO<sub>2</sub>H to complex **2** in d<sub>8</sub>-THF.

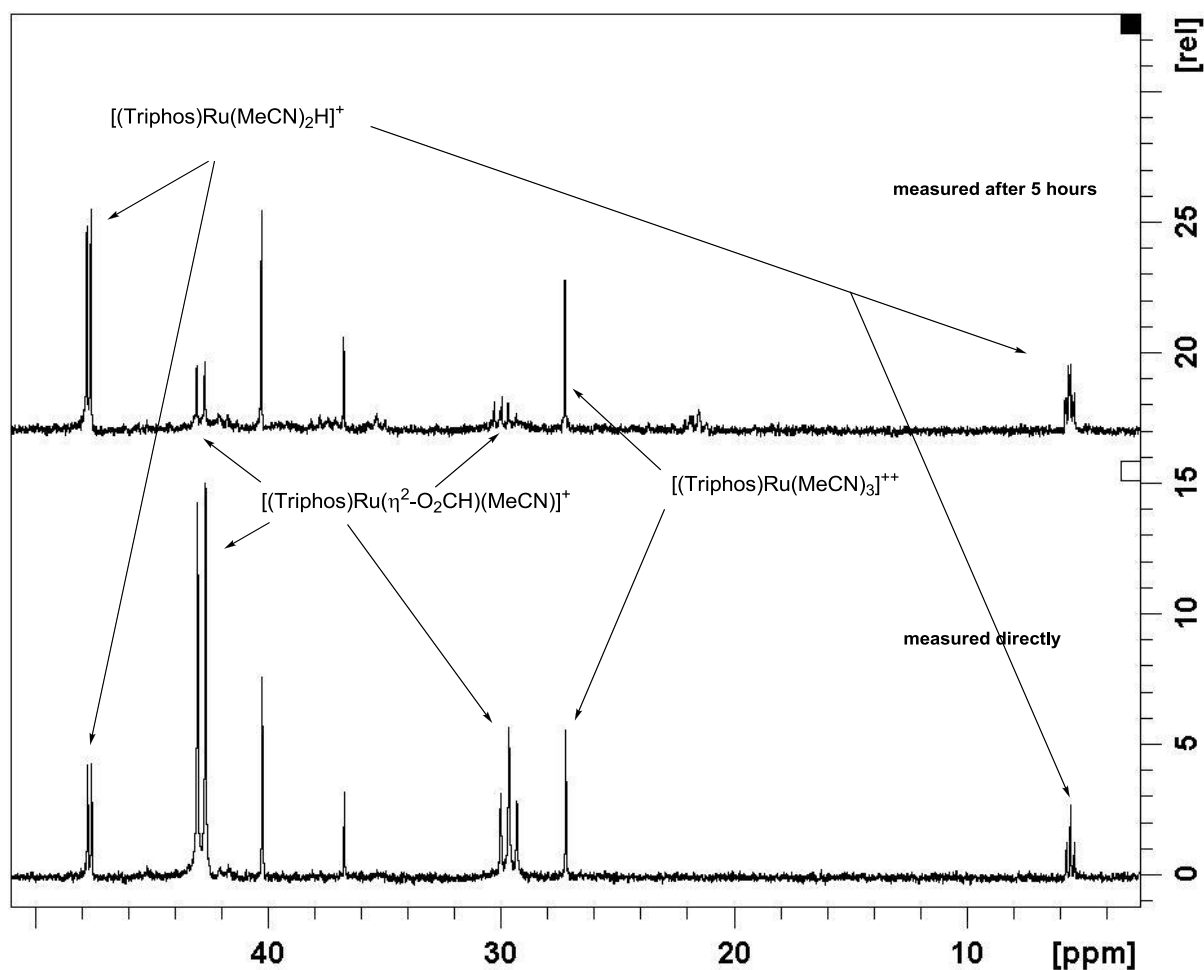

**Figure 21:** <sup>31</sup>P{<sup>1</sup>H}-NMR (121 MHz, d<sub>8</sub>-THF, room temperature) spectrum after addition of 1 equivalent HNTf<sub>2</sub> and 1 equivalent HCO<sub>2</sub>H to complex **2** in d<sub>8</sub>-THF and 0.1 mL acetonitrile measured directly (bottom) and again after 5 hours at room temperature (top).

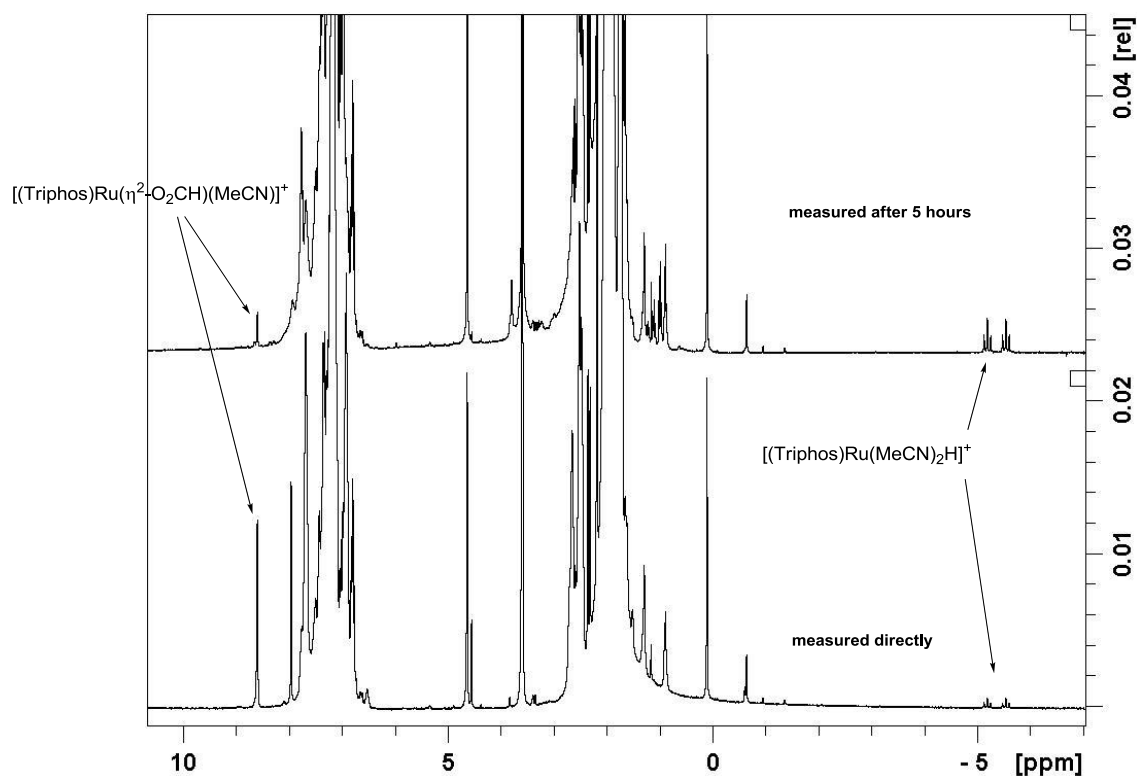

**Figure 22:**  $^1\text{H}$ -NMR (300 MHz,  $d_8$ -THF, room temperature) spectrum after addition of 1 equivalent  $\text{HNTf}_2$  and 1 equivalent  $\text{HCO}_2\text{H}$  to complex **2** in  $d_8$ -THF and 0.1 mL acetonitrile measured directly (bottom) and again after 5 hours at room temperature (top).

### 6.3 Conversion of formate species **3a** to methanol

$\text{HNTf}_2$  (7.0 mg, 0.025 mmol) was dissolved in  $d_8$ -THF (0.5 mL) and added to complex **2** (19.5 mg, 0.025 mmol, 1 eq.) in  $d_8$ -THF (0.5 mL) at room temperature giving a deep red coloured solution.  $\text{HCO}_2\text{H}$  (0.9  $\mu\text{L}$ , 0.025 mmol, 1 eq.) was added via micro-syringe and the solution became orange. 0.3 mL of this solution were transferred to a high-pressure NMR tube (volume = 0.93 mL). A  $^1\text{H}$ -NMR spectrum of this solution was measured at ambient pressure and room temperature (Figure 23, top) and showed formation of **3a** in about 86 %. The NMR-tube was pressurised with 60 bar of hydrogen and carefully (only the lower 4 cm of the tube were dipped into the oil-bath) heated at 140  $^\circ\text{C}$  in an external oil-bath for 40 minutes. After that, a  $^1\text{H}$ -NMR-spectrum of the solution was measured at 80  $^\circ\text{C}$  in the spectrometer (Figure 23, bottom). Integration of the formate signal and the methanol signal relative to the aromatic protons of the triphos-ligand revealed a ca. 97 % conversion of the formate-ligand to methanol. In the corresponding  $^{31}\text{P}\{^1\text{H}\}$ -NMR spectra the formation of **6** was observed in about 44 % of the total intensity besides some other, yet unknown species (Figure 24). In the hydride region of the  $^1\text{H}$ -NMR-spectrum the signal corresponding to **6** (bs, -8.8 ppm) was observed. Besides that, two small signals at -6.7 ppm (bs) and -9.4 ppm (bs) corresponding to yet unknown species were observed.

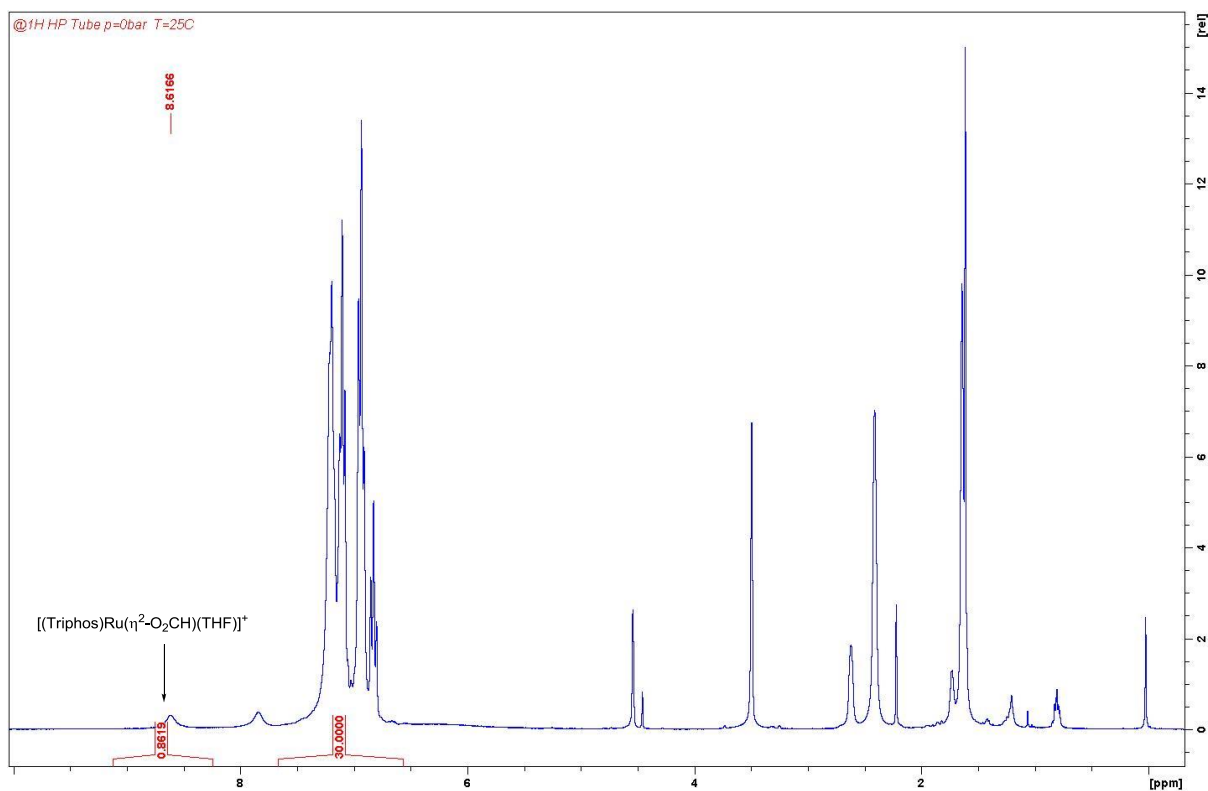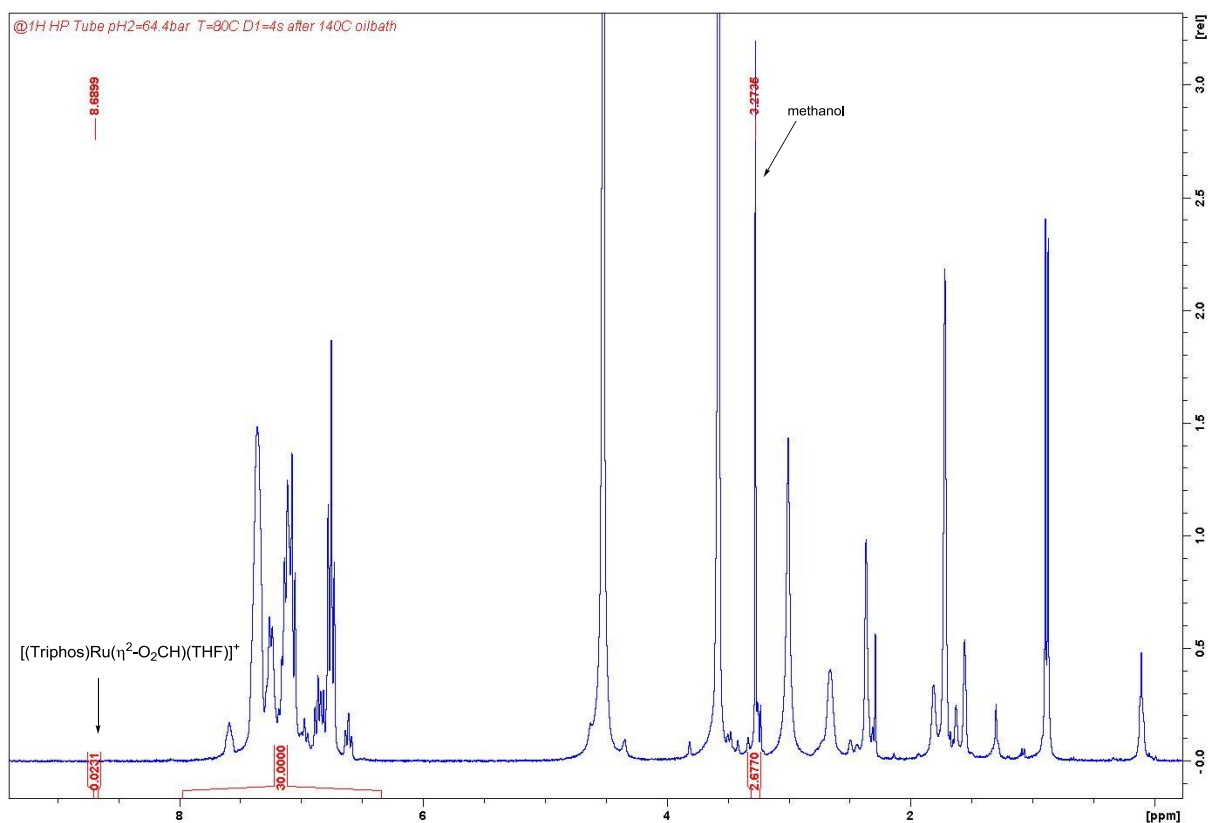

**Figure 23:** <sup>1</sup>H-NMR (300 MHz, *d*<sub>8</sub>-THF) spectrum of the reaction mixture after addition of 1 equivalent HNTf<sub>2</sub> and 1 equivalent HCO<sub>2</sub>H to complex **2** in *d*<sub>8</sub>-THF measured in a high pressure NMR tube at room temperature before pressurising (top) and at 80 °C after heating to 140 °C in an oil-bath under 60 bar H<sub>2</sub>-pressure (bottom).

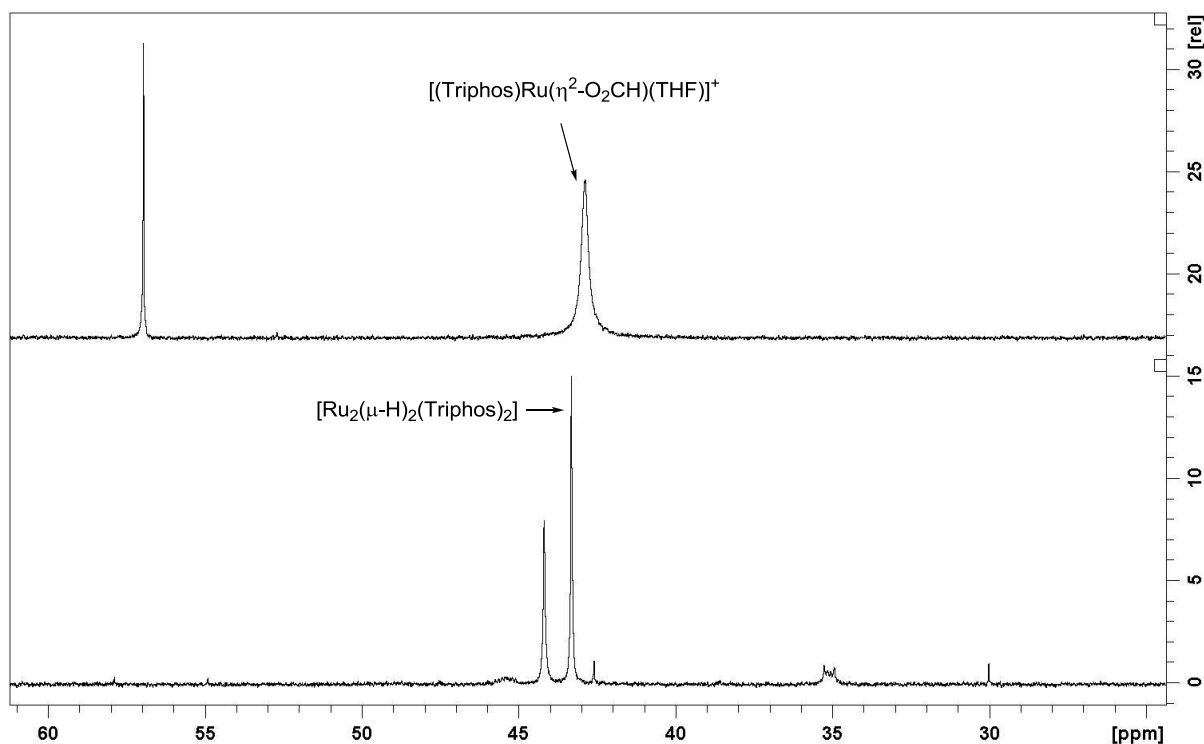

**Figure 24:**  $^{31}\text{P}\{^1\text{H}\}$ -NMR (121 MHz,  $d_8$ -THF, room temperature) spectrum of the reaction mixture after addition of 1 equivalent  $\text{HNTf}_2$  and 1 equivalent  $\text{HCO}_2\text{H}$  to complex **2** in  $d_8$ -THF measured in a high pressure NMR tube at room temperature before pressurising (top) and at 80 °C after heating to 140 °C in an oil-bath under 60 bar  $\text{H}_2$ -pressure for 40 minutes (bottom).

#### 6.4 In-situ NMR study of the $\text{CO}_2$ hydrogenation reaction using complex **2** with $\text{HNTf}_2$

$\text{HNTf}_2$  (3.5 mg, 0.0125 mmol) and complex **2** (9.8 mg, 0.0125 mmol, 1 eq.) were dissolved in  $d_8$ -THF (0.5 mL) at room temperature giving a deep red coloured solution. 0.3 mL of this solution were transferred to a high-pressure NMR tube (volume = 0.93 mL). Of this solution  $^1\text{H}$ -NMR and  $^{31}\text{P}\{^1\text{H}\}$ -NMR spectra were recorded at 25 °C. After pressurising with 20 bar of carbon dioxide and 60 bar of hydrogen again spectra were recorded at room temperature. The NMR-tube was heated at 80 °C in the NMR-machine and  $^1\text{H}$ -NMR and  $^{31}\text{P}\{^1\text{H}\}$ -NMR spectra were recorded directly and again after 1, 2 and 4 hours at 80 °C. The time shift between recording the  $^1\text{H}$ -NMR spectra and the  $^{31}\text{P}\{^1\text{H}\}$ -NMR spectra was 30 minutes due to shimming and time for measuring the  $^1\text{H}$ -NMR. After cooling to room temperature again a  $^1\text{H}$ -NMR was recorded.

The recorded  $^{31}\text{P}\{^1\text{H}\}$ -NMR spectra are shown in Figure 25. The spectrum recorded at 0 bar and 25 °C showed two singlets at 48.6 and 58.8 ppm and no signal due to the initial complex **2**. We may speculate that the signal at 48.6 ppm is due to the cationic complex  $[\text{Ru}(\text{Triphos})(\text{methylallyl})]^+$  resulting from protonation of the TMM ligand in complex **2**,<sup>[5]</sup> whereas the signal at 58.8 ppm might belong to a solvato complex  $[\text{Ru}(\text{Triphos})\text{S}_3]^{2+}$  forming after complete protonation of the TMM ligand to isobutene. After pressurising with  $\text{H}_2/\text{CO}_2$  already at room temperature both singlets disappeared almost completely giving rise to a broad singlet with a shoulder at 43.8 ppm and after heating at 80 °C



only this broad singlet remained. The same signal was observed for the formate complex  $[(\text{Triphos})\text{Ru}(\eta^2\text{-O}_2\text{CH})(\text{THF})]^+$  **3a** in the investigations done before (vide supra). Formation of a small singlet at 43.2 ppm due to  $[\text{Ru}_2(\mu\text{-H})_2(\text{Triphos})_2]$  **6** was also observed after 90 minutes at 80 °C. Figure 26 shows a magnification of the formate-area of the recorded  $^1\text{H}$ -NMR spectra. Already after pressurising  $\text{CO}_2/\text{H}_2$  at room temperature a formate signal at 8.7 ppm appeared. Together with the  $^{31}\text{P}\{^1\text{H}\}$ -NMR data formation of a certain amount of the formate complex  $[(\text{Triphos})\text{Ru}(\eta^2\text{-O}_2\text{CH})(\text{THF})]^+$  **3a** already at room temperature seems to be likely. At 80 °C the formate signal was strongly broadened indicating fluctuating formate species. At the same time formation of methanol was observed. After cooling again to room temperature, clearly the signal at 8.7 ppm due to the formate complex  $[(\text{Triphos})\text{Ru}(\eta^2\text{-O}_2\text{CH})(\text{THF})]^+$  **3a** was observed. This behaviour indicates that **3a** is a resting state.

In Figure 27 the hydride areas of the recorded  $^1\text{H}$ -NMR spectra are depicted. In the spectra after 1 and 2 hours a very small signal at -6.7 ppm was observed. However, this signal disappeared again after two further hours, making it very unlikely to play a role in the catalytic transformation of  $\text{CO}_2$  and  $\text{H}_2$  to methanol. The hydride signal at -8.8 ppm forming after 60 minutes is due to  $[\text{Ru}_2(\mu\text{-H})_2(\text{Triphos})_2]$  **6**.

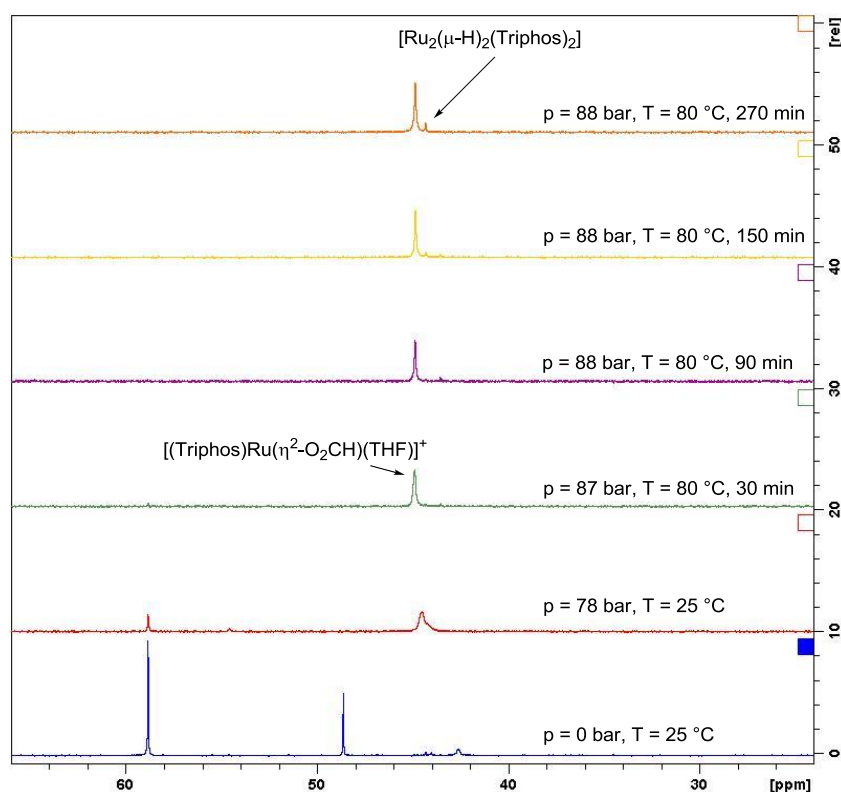

**Figure 25:**  $^{31}\text{P}\{^1\text{H}\}$ -NMR (121 MHz,  $d_8$ -THF) spectra of a  $\text{CO}_2$  hydrogenation reaction carried out in a high-pressure NMR-tube. Reaction conditions:  $c = 25 \mu\text{mol/mL}$  complex **2**, 1 equivalent  $\text{HNTf}_2$ , 0.3 mL  $d_8$ -THF,  $p(\text{CO}_2) = 20 \text{ bar}$  at r.t.,  $p(\text{H}_2) = 60 \text{ bar}$  at r.t..

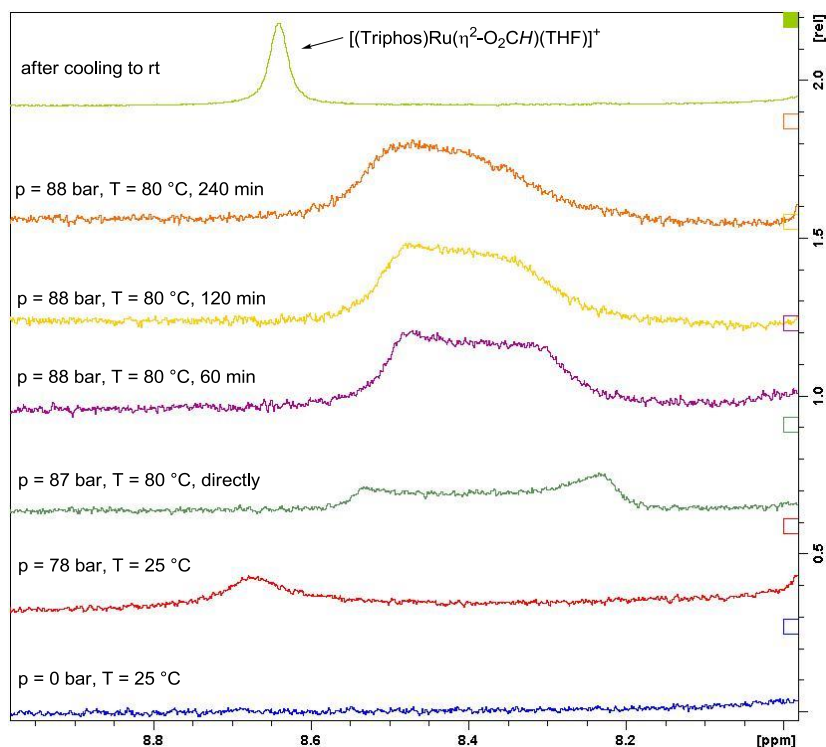

**Figure 26:**  $^1\text{H}$ -NMR (300 MHz,  $d_8$ -THF) spectra of a  $\text{CO}_2$  hydrogenation reaction carried out in a high-pressure NMR-tube. Magnification of the formate area. Reaction conditions:  $c = 25 \mu\text{mol/mL}$  complex **2**, 1 equivalent  $\text{HNTf}_2$ , 0.3 mL  $d_8$ -THF,  $p(\text{CO}_2) = 20 \text{ bar}$ ,  $p(\text{H}_2) = 60 \text{ bar}$ .

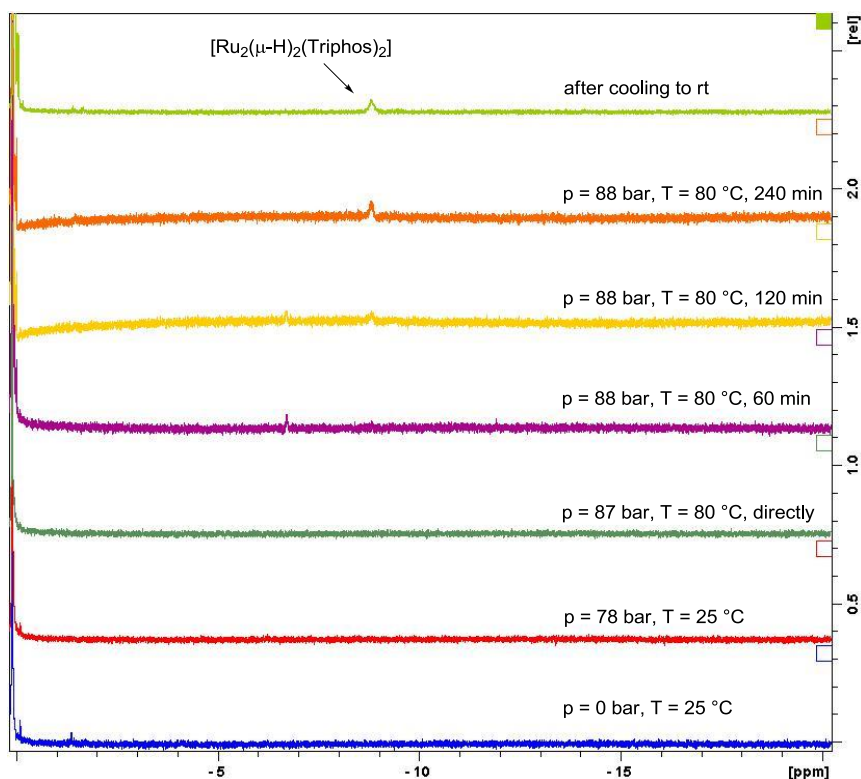

**Figure 27:**  $^1\text{H}$ -NMR (300 MHz,  $d_8$ -THF) spectra of a  $\text{CO}_2$  hydrogenation reaction carried out in a high-pressure NMR-tube. Magnification of the hydride area. Reaction conditions:  $c = 25 \mu\text{mol/mL}$  complex **2**, 1 equivalent  $\text{HNTf}_2$ , 0.3 mL  $d_8$ -THF,  $p(\text{CO}_2) = 20 \text{ bar}$ ,  $p(\text{H}_2) = 60 \text{ bar}$ .

## 6.5 NMR-spectroscopic analysis of the reaction mixture using complex **2** together with *p*-TsOH

*p*-TsOH (0.0375 mmol, 1.5 eq.) and complex **2** (0.025 mmol) were dissolved in *d*<sub>8</sub>-THF (1.0 mL) at room temperature giving a clear yellow solution. The solution was transferred to the autoclave and a CO<sub>2</sub> hydrogenation reaction performed at 140 °C, 60 bar (at r.t.) of hydrogen and 20 bar (at r.t.) of carbon dioxide. After 1 hour the reaction was terminated and the reaction solution analysed by NMR at -40 °C. The <sup>31</sup>P{<sup>1</sup>H}-NMR spectrum recorded at -40 °C (Figure 28) showed the same signals of the formate complex [(Triphos)Ru(η<sup>2</sup>-O<sub>2</sub>CH)(THF)]<sup>+</sup> **3a** as observed when HNTf<sub>2</sub> was used as acid additive. Compared to the spectrum shown in Figure 13 some new signals were observed: The triplet (42.0 ppm) and doublet (36.1 ppm) were assigned to the complex [(Triphos)Ru(*p*-TsO)<sub>2</sub>] **14** based on NMR and mass spectrometric data. Additionally, two sets of three correlating doublet of doublets [assigned as a) and b) in Figure 28] were observed, indicating the formation of two different complexes with facially coordinated triphos-ligand and three different further ligands (eg. H, CO, THF). **14** could be prepared independently by addition of 2 equivalents of *p*-TsOH to complex **2** in THF at room temperature (Figures 29-30).

Analytical data of [(Triphos)Ru(*p*-TsO)<sub>2</sub>] **14**:

<sup>1</sup>H-NMR (400 MHz, *d*<sub>8</sub>-THF, rt): δ = 7.71 (d, <sup>3</sup>J<sub>H-H</sub> = 7.8 Hz, 4H, C<sub>Ar</sub>-H in *p*-TsOH), 7.47 (br, 12H, C<sub>Ar</sub>-H in P-Ph), 7.14 (m, 6H, C<sub>Ar</sub>-H in P-Ph), 7.08 (d, <sup>3</sup>J<sub>H-H</sub> = 7.8 Hz, 4H, C<sub>Ar</sub>-H in *p*-TsOH), 6.97 (m, 12H, C<sub>Ar</sub>-H in P-Ph), 2.40 (br, 6H, P-CH<sub>2</sub>), 2.31 (s, 6H, CH<sub>3</sub> in *p*-TsOH), 1.54 [br, 3H, (Ph<sub>2</sub>PCH<sub>2</sub>)<sub>3</sub>C-CH<sub>3</sub>] ppm.

<sup>31</sup>P{<sup>1</sup>H}-NMR (162 MHz, *d*<sub>8</sub>-THF, rt): δ = 36.4 (br, 3P) ppm.

<sup>31</sup>P{<sup>1</sup>H}-NMR (243 MHz, *d*<sub>8</sub>-THF, -40 °C): δ = 40.5 (t, J<sub>P-P</sub> = 47.5 Hz, 1P), 36.5 (d, J<sub>P-P</sub> = 47.5 Hz, 2 P) ppm.

<sup>13</sup>C{<sup>1</sup>H}-NMR (100 MHz, *d*<sub>8</sub>-THF, rt): δ = 135.4 (s, C<sub>Ar</sub>), 134.9 (s, C<sub>Ar</sub>), 134.5 (s, C<sub>Ar</sub>), 132.2 (s, C<sub>Ar</sub>-H), 128.6 (s, C<sub>Ar</sub>-H), 127.7 (s, C<sub>Ar</sub>-H), 127.5 (s, C<sub>Ar</sub>-H), 126.2 (s, C<sub>Ar</sub>-H), 37.0 [s, (Ph<sub>2</sub>PCH<sub>2</sub>)<sub>3</sub>C-CH<sub>3</sub>], 36.0 (m, CH<sub>3</sub>), 32.5 (br, P-CH<sub>2</sub>), 20.0 (s, CH<sub>3</sub> in *p*-TsOH) ppm.

MS(FAB) (+): m/z = 1067.2

MS(FAB) (-): m/z = 171.1

Measuring a <sup>31</sup>P{<sup>1</sup>H}-NMR spectrum of [(Triphos)Ru(*p*-TsO)<sub>2</sub>] **14** in *d*<sub>3</sub>-MeCN yielded a sharp singlet at 27.3 ppm, which was assigned to the literature known solvato complex [(Triphos)Ru(MeCN)<sub>3</sub>]<sup>++</sup> **16**.<sup>[6]</sup>

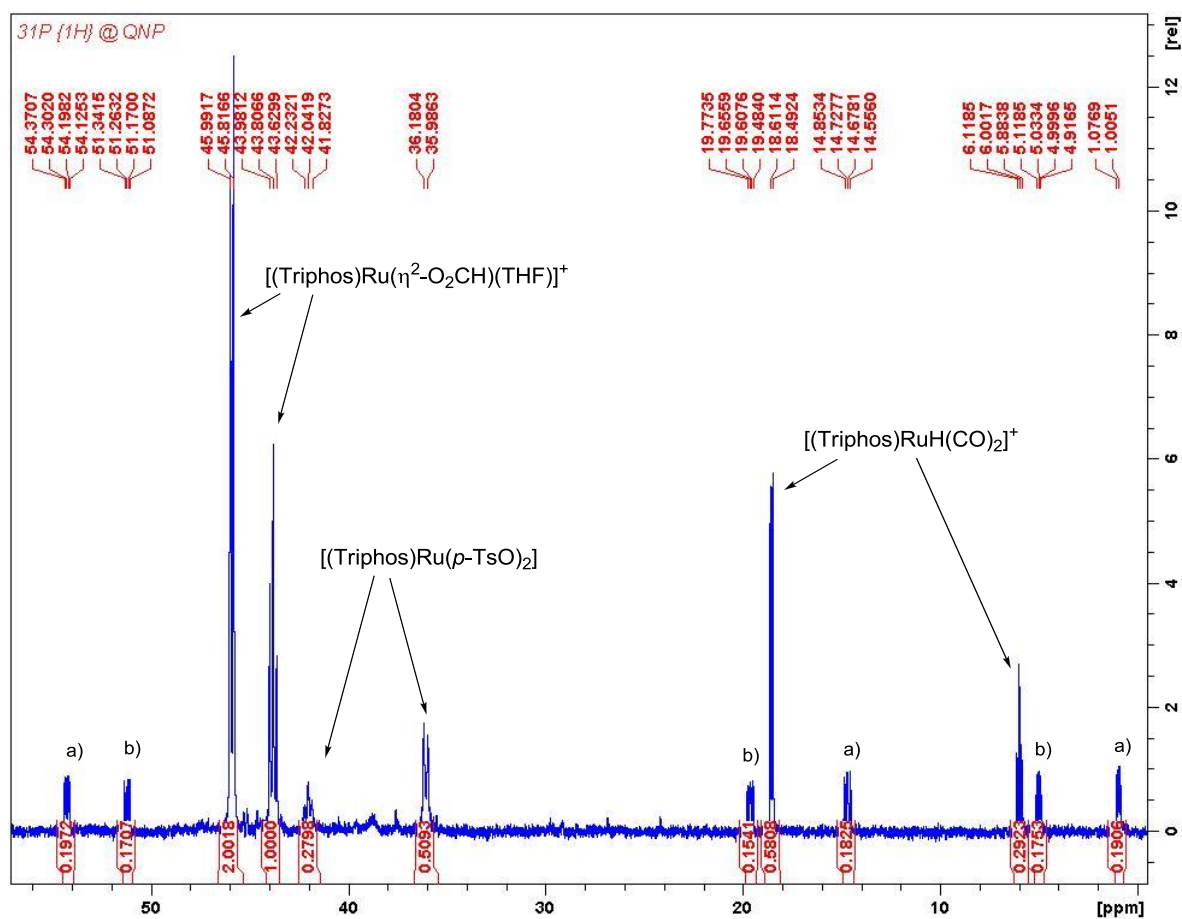

**Figure 28:**  $^{31}\text{P}\{^1\text{H}\}$ -NMR (243 MHz,  $d_8$ -THF,  $-40^\circ\text{C}$ ) spectrum of the reaction solution of a  $\text{CO}_2$ -hydrogenation reaction (25  $\mu\text{mol}$  complex **2**, 1.5 equivalents  $p$ -TsOH, 1.0 mL  $d_8$ -THF,  $p(\text{CO}_2) = 20$  bar,  $p(\text{H}_2) = 60$  bar,  $140^\circ\text{C}$ , 1 h reaction time).

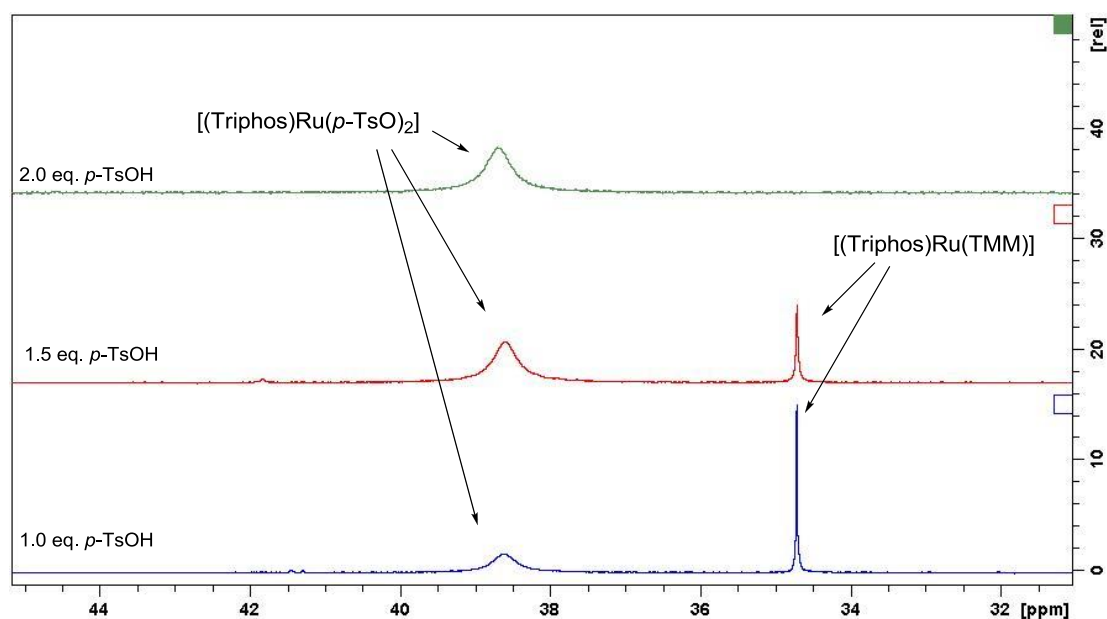

**Figure 29:**  $^{31}\text{P}\{^1\text{H}\}$ -NMR (162 MHz,  $d_8$ -THF, rt) spectra of the stepwise addition of  $p$ -TsOH to complex **2** in  $d_8$ -THF at room temperature.

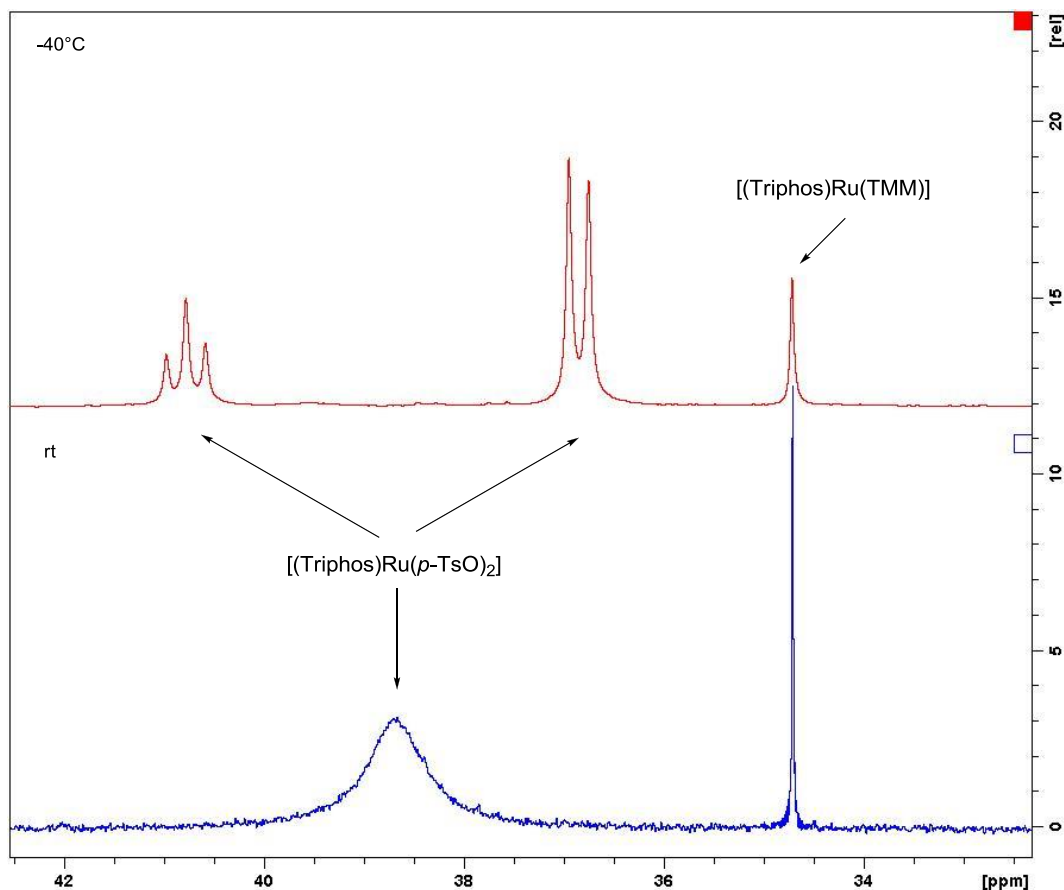

**Figure 30:**  $^{31}\text{P}\{^1\text{H}\}$ -NMR (243 MHz,  $d_8$ -THF) spectra of the reaction solution after addition of  $p$ -TsOH (1.5 eq.) to complex **2** in  $d_8$ -THF at room temperature (bottom) and  $-40^\circ\text{C}$  (top).

## 6.6 NMR-spectroscopic analysis of the reaction mixture using complex **2** in the absence of acid

A  $\text{CO}_2$  hydrogenation experiment was performed using complex **2** in the absence of any acid additive and terminated after 1 hour (25  $\mu\text{mol}$  complex **2**, 1.0 mL  $d_8$ -THF,  $p(\text{CO}_2) = 20$  bar at r.t.,  $p(\text{H}_2) = 60$  bar at r.t.,  $140^\circ\text{C}$ ). The reaction solution was analysed by NMR. The  $^{31}\text{P}\{^1\text{H}\}$ -NMR spectrum showed almost exclusively the formation of  $[(\text{Triphos})\text{Ru}(\text{H})_2\text{CO}]$  **12** (Figure 31). The hydride region of the  $^1\text{H}$ -NMR showed the corresponding doublet of doublets ( $\delta = -7.25$  ppm,  $J_{\text{H-P}} = 50.6$  Hz,  $J_{\text{H-P}} = 18.1$  Hz).

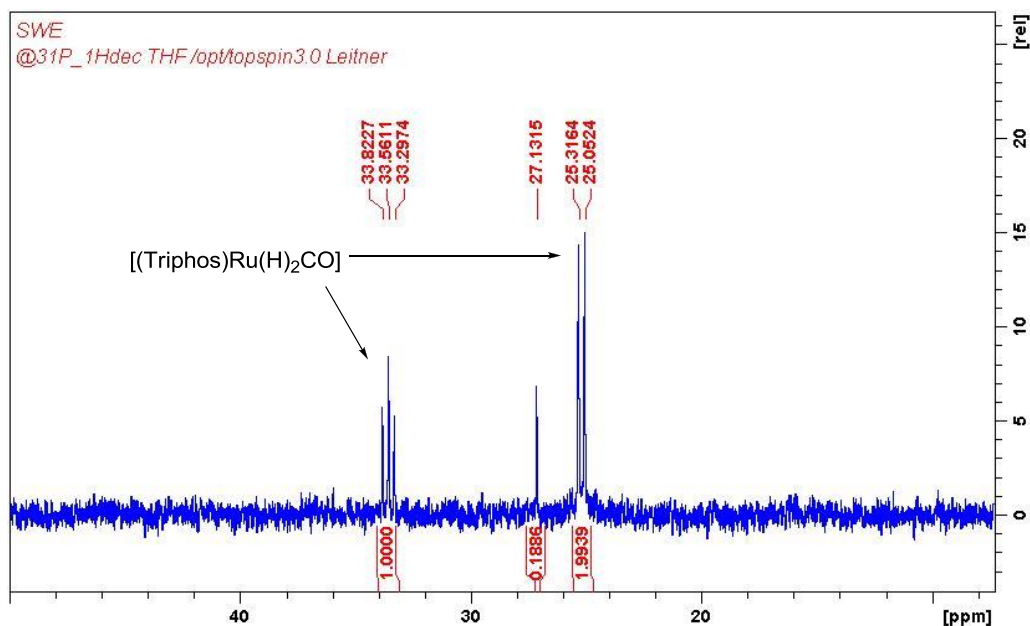

**Figure 31:**  $^{31}\text{P}\{^1\text{H}\}$ -NMR (121 MHz,  $d_8$ -THF, r.t.) spectrum of the reaction solution of a  $\text{CO}_2$ -hydrogenation reaction in the absence of acid additive (25  $\mu\text{mol}$  complex **2**, 1.0 mL  $d_8$ -THF,  $p(\text{CO}_2) = 20$  bar at r.t.,  $p(\text{H}_2) = 60$  bar at r.t., 140  $^\circ\text{C}$ , 1 h reaction time).

## 6.7 NMR-spectroscopic analysis of the reaction mixture using complex **12** together with $\text{HNTf}_2$

The catalytic hydrogenation of  $\text{CO}_2$  to methanol using the carbonyl complex  $[(\text{Triphos})\text{Ru}(\text{H})_2\text{CO}]$  **12** was investigated using NMR-spectroscopy. After addition of one equivalent  $\text{HNTf}_2$  in  $d_8$ -THF to  $[(\text{Triphos})\text{Ru}(\text{H})_2\text{CO}]$  **12** gas evolution was observed and the  $^{31}\text{P}\{^1\text{H}\}$ -NMR showed the formation of three doublets of doublets (Figure 32). In the  $^1\text{H}$ -NMR the hydride signal of  $[(\text{Triphos})\text{Ru}(\text{H})_2\text{CO}]$  **12** (-7.36 ppm, dd,  $J_{\text{H-P}} = 50.2$  Hz,  $J_{\text{H-P}} = 18.4$  Hz) disappeared and a pseudo doublet of triplets appeared (-5.53 ppm, dt,  $J_{\text{H-P}} = 88.0$  Hz,  $J_{\text{H-P}} = 17.7$  Hz). Based on this data we tentatively propose the loss of a hydride ligand upon addition of the acid and formation of a solvate complex  $[(\text{Triphos})\text{Ru}(\text{H})(\text{CO})\text{S}]^+$  **17**.

After performing a  $\text{CO}_2$  hydrogenation reaction using this mixture (25  $\mu\text{mol}$  complex **12**, 1 equivalent  $\text{HNTf}_2$ , 1.0 mL  $d_8$ -THF,  $p(\text{CO}_2) = 20$  bar at r.t.,  $p(\text{H}_2) = 60$  bar at r.t., 140  $^\circ\text{C}$ , 1 h reaction time) the reaction solution was analysed by  $^{31}\text{P}\{^1\text{H}\}$ -NMR at -40  $^\circ\text{C}$ . The spectrum (Figure 33) again showed the formation of the formate complex  $[(\text{Triphos})\text{Ru}(\eta^2\text{-O}_2\text{CH})(\text{THF})]^+$  **3a**.

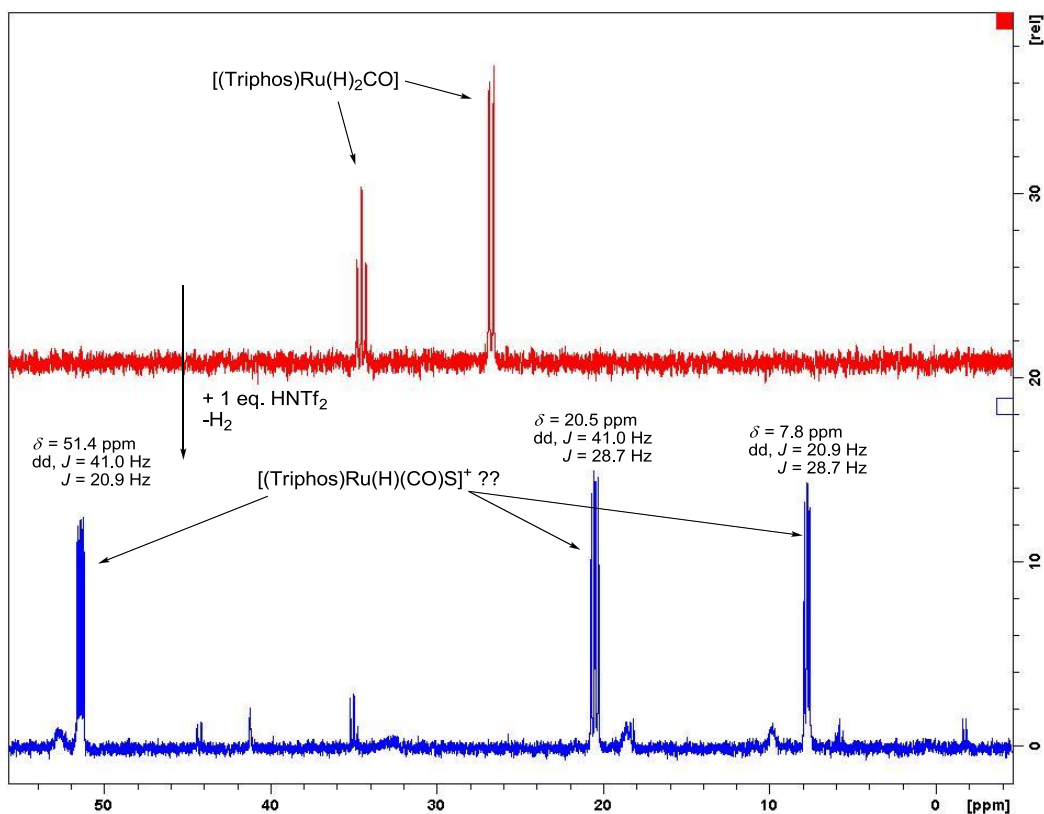

**Figure 32:**  $^{31}\text{P}\{^1\text{H}\}$ -NMR (162 MHz,  $d_8$ -THF, r.t.) spectrum before (top) and after (bottom) addition of 1 equivalent  $\text{HNTf}_2$  to complex **12** in  $d_8$ -THF. S = THF,  $\text{H}_2\text{O}$ .

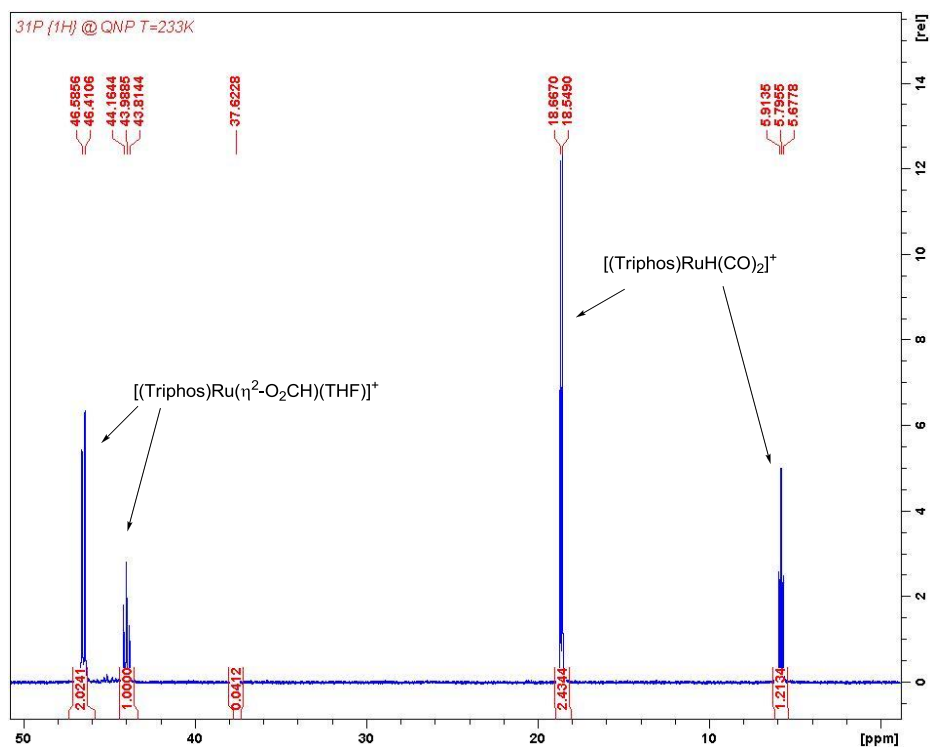

**Figure 33:**  $^{31}\text{P}\{^1\text{H}\}$ -NMR (243 MHz,  $d_8$ -THF,  $-40$  °C) spectrum of the reaction solution of a  $\text{CO}_2$ -hydrogenation reaction (25  $\mu\text{mol}$  complex **12**, 1 equivalent  $\text{HNTf}_2$ , 1.0 mL  $d_8$ -THF,  $p(\text{CO}_2) = 20$  bar at r.t.,  $p(\text{H}_2) = 60$  bar at r.t.,  $140$  °C, 1 h reaction time).

## 6.8 In-situ NMR study of the CO<sub>2</sub> hydrogenation reaction using complex 4

[(Triphos)Ru( $\eta^2$ -OAc)(S)][NTf<sub>2</sub>] **4** (13.3 mg, 0.0125 mmol) was dissolved in *d*<sub>8</sub>-THF (0.5 mL) and 0.3 mL of this yellow solution transferred to a high-pressure NMR-tube (volume = 0.93 mL). Of this solution <sup>1</sup>H-NMR and <sup>31</sup>P{<sup>1</sup>H}-NMR spectra were recorded at 25 °C. After pressurising with 20 bar of carbon dioxide and 60 bar of hydrogen again spectra were recorded at room temperature. The NMR-tube was heated at 80 °C in the NMR-machine and <sup>1</sup>H-NMR and <sup>31</sup>P{<sup>1</sup>H}-NMR spectra were recorded directly and again after 1.5 hours at 80 °C. The NMR-tube was carefully (only the lower 4 cm of the tube containing the solution were dipped into the oilbath) heated at 140 °C in an external oil-bath for 1 hour and after that again measured at 80 °C. After cooling to room temperature further <sup>1</sup>H-NMR and <sup>31</sup>P{<sup>1</sup>H}-NMR spectra were recorded at room temperature.

Figure 34 shows the recorded <sup>31</sup>P{<sup>1</sup>H}-NMR spectra. At 25 °C and 0 bar the singlet due to the starting complex **4** was observed at 42.3 ppm. After pressurisation with CO<sub>2</sub>/H<sub>2</sub> a small and broad singlet at 42.9 ppm appeared already at 25 °C. After heating at 80 °C inside the NMR-machine both signals merged and again only one broad singlet was observed at around 42 ppm. No changes were observed in the <sup>31</sup>P{<sup>1</sup>H}-NMR spectra after heating for 1.5 hours at 80 °C and after heating for 1 hour at 140 °C. After cooling down to 25 °C two signals were observed again at 42.3 ppm and 42.9 ppm. The signal at 42.3 ppm integrated to around 40 % of the total intensity and was ascribed to the starting complex **4**. The broader signal at 42.9 ppm was assigned to the formate complex [(Triphos)Ru( $\eta^2$ -O<sub>2</sub>CH)(THF)]<sup>+</sup> **3a** as the formate signal of **3a** at 8.6 ppm was also observed in the <sup>1</sup>H-NMR (Figure 35).

Figure 35 shows a magnification of the formate area of the recorded <sup>1</sup>H-NMR spectra. Directly after pressurising with CO<sub>2</sub>/H<sub>2</sub> at 25 °C a small signal at 8.6 ppm appeared. This was in line with the formation of a small signal at 42.9 ppm in the corresponding <sup>31</sup>P{<sup>1</sup>H}-NMR spectrum, and indicated formation of a small amount of [(Triphos)Ru( $\eta^2$ -O<sub>2</sub>CH)(THF)]<sup>+</sup> **3a**. At the same time a very small broad hump at 10.6 ppm (not shown in the magnification) was observed in the <sup>1</sup>H-NMR, indicating that a very little amount of free carboxylic acid was released into the solution. Upon heating to 140 °C this signal disappeared. Directly after heating to 80 °C, a singlet at 8.1 ppm appeared which became broader after heating to 140 °C. After cooling to 25 °C, this broad singlet disappeared and two singlets at 7.6 ppm and 8.6 ppm were observed. The signal at 8.6 ppm was assigned to the formate complex [(Triphos)Ru( $\eta^2$ -O<sub>2</sub>CH)(THF)]<sup>+</sup> **3a** taking into account the corresponding <sup>31</sup>P{<sup>1</sup>H}-NMR spectrum. The singlet at 7.6 ppm was assigned to methyl formate, which is formed in small amounts once methanol is present in the reaction mixture, especially at lower temperatures. Methyl formate does not accumulate in the reaction mixture, as it is also hydrogenated to methanol. However, this reaction pathway does not seem to be significant, as no autocatalytic effect was observed during the course of the reaction.



In the  $^1\text{H}$ -NMR spectrum directly after heating to  $80\text{ }^\circ\text{C}$  formation of methanol (s, 3.2 ppm) from  $\text{CO}_2$  hydrogenation was observed as well as formation of ethanol (t, 1.1 ppm) from hydrogenation of the acetate ligands of starting complex **4**.

In Figure 36 a magnification of the hydride region of the recorded  $^1\text{H}$ -NMR spectra is depicted. No hydride species was observed in any of the  $^1\text{H}$ -NMR spectra.

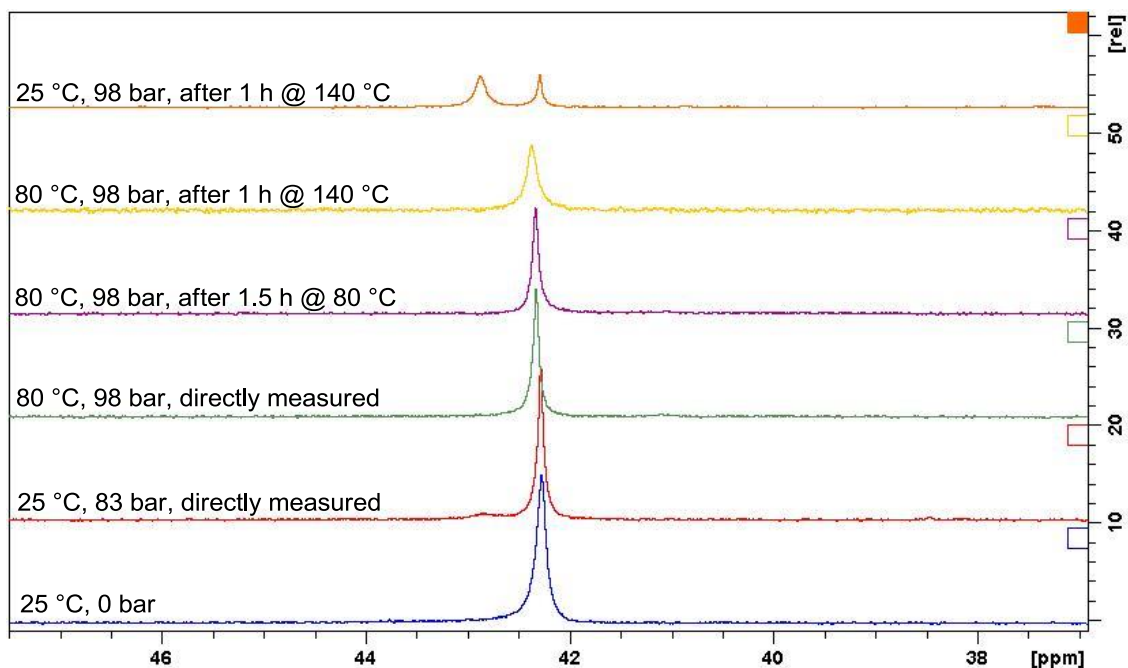

**Figure 34:**  $^{31}\text{P}\{^1\text{H}\}$ -NMR (121 MHz,  $d_8$ -THF) spectra of a  $\text{CO}_2$  hydrogenation reaction carried out in a high-pressure NMR-tube. Reaction conditions:  $c = 25\text{ }\mu\text{mol/mL}$  complex **4**,  $0.3\text{ mL } d_8$ -THF,  $p(\text{CO}_2) = 20\text{ bar}$  at r.t.,  $p(\text{H}_2) = 60\text{ bar}$  at r.t..

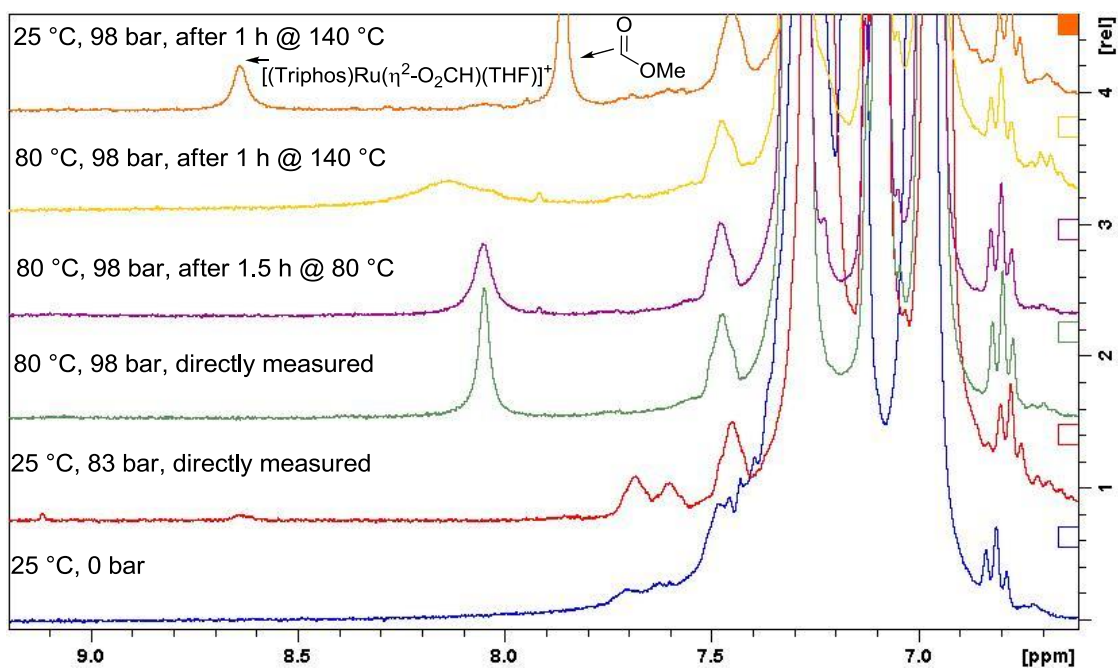

**Figure 35:**  $^1\text{H-NMR}$  (300 MHz,  $d_8\text{-THF}$ ) spectra of a  $\text{CO}_2$  hydrogenation reaction carried out in a high-pressure NMR-tube. Reaction conditions:  $c = 25 \mu\text{mol/mL}$  complex **4**, 0.3 mL  $d_8\text{-THF}$ ,  $p(\text{CO}_2) = 20 \text{ bar}$  at r.t.,  $p(\text{H}_2) = 60 \text{ bar}$  at r.t.. Magnification of the formate area.

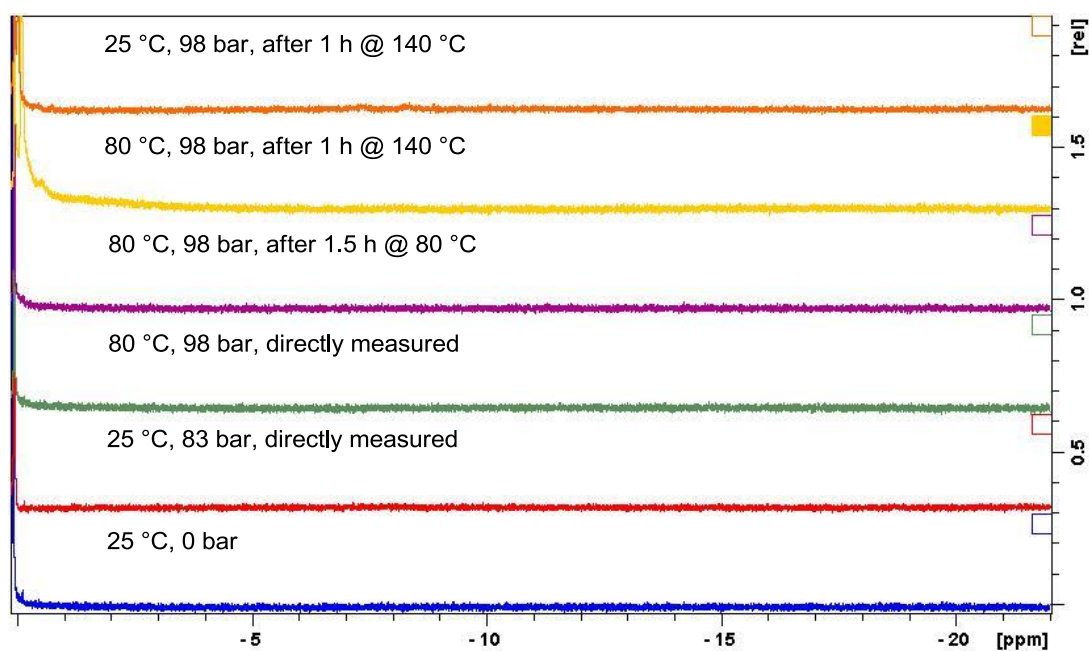

**Figure 36:**  $^1\text{H-NMR}$  (300 MHz,  $d_8\text{-THF}$ ) spectra of a  $\text{CO}_2$  hydrogenation reaction carried out in a high-pressure NMR-tube. Reaction conditions:  $c = 25 \mu\text{mol/mL}$  complex **4**, 0.3 mL  $d_8\text{-THF}$ ,  $p(\text{CO}_2) = 20 \text{ bar}$  at r.t.,  $p(\text{H}_2) = 60 \text{ bar}$  at r.t.. Magnification of the hydride area.

## 7 Repetitive-Batch experiments using 2-MTHF/H<sub>2</sub>O

### 7.1 Extraction of MeOH from 2-MTHF with water

An extraction experiment was conducted as follows: MeOH (0.2 mL, 158 mg, 4.94 mmol) was dissolved in 2-MTHF (1.0 mL, 892 mg). Water (1.0 mL, 996 mg) was added, the solution stirred (ca. 20 seconds) and the phases separated (after ca. 10 minutes). Phase separation was fast and two clear phases were obtained. The phases were analysed for their methanol content using mesitylene as internal standard in *d*<sub>6</sub>-acetone via <sup>1</sup>H-NMR.

The 2-MTHF phase (765 mg) contained 20 % of the overall MeOH (0.98 mmol), whereas the water phase (1.281 g) contained 80 % of the overall MeOH (3.89 mmol). The mass balance was closed to 99 %.

### 7.2 Repetitive batch experiment using complex 2 together with HNTf<sub>2</sub> in 2-MTHF

Catalyst **2** (0.0125 mmol) and HNTf<sub>2</sub> (0.0125 mmol, 1 eq.) were dissolved in 2-MTHF (2.0 mL) and a CO<sub>2</sub> hydrogenation reaction performed like described above ( $p(\text{CO}_2) = 20$  bar at r.t.,  $p(\text{H}_2) = 60$  bar at r.t., 140 °C). After 16 hours the reaction was stopped by cooling the autoclave in an ice/water bath and subsequent venting of the autoclave to release the remaining pressure. The autoclave was connected to a Schlenk line and the reaction solution transferred to a Schlenk tube via cannula. Degassed water (2.0 mL) was added and the solution stirred for ca. 20 seconds (Figure 37). After 10 minutes the phases were separated. The almost clear water phase was weighed and analysed for its methanol content via <sup>1</sup>H-NMR analysis using mesitylene as internal standard in *d*<sub>6</sub>-acetone. The orange, clear 2-MTHF phase was transferred back to the autoclave. 2-MTHF (0.25 mL) was added to compensate the loss of 2-MTHF in the water phase. The second, third, and fourth batch experiment were run under the same conditions as the first one.

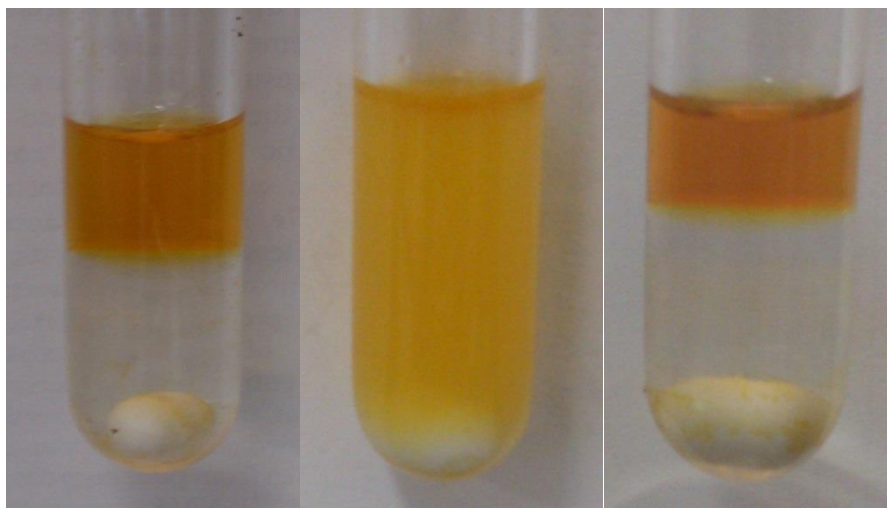

**Figure 37:** Phase behavior during the extraction of methanol from the 2-MTHF phase containing catalyst **2** and HNTf<sub>2</sub>. The orange colour of the MTHF phase results from the dissolved catalyst. Left: after addition of H<sub>2</sub>O to the 2-MTHF phase; middle: during mixing; right: phase separation after 10 minutes.

## 8 Additional catalysis results

**Table S1.** Additional variation of reaction parameters in the catalytic hydrogenation of carbon dioxide to methanol.<sup>[a]</sup>

| Entry            | Cat      | Acid (eq)               | <i>T</i><br>[°C] | <i>p</i> <sub>H<sub>2</sub></sub> / <i>p</i> <sub>CO<sub>2</sub></sub> <sup>[b]</sup><br>[bar/bar] | Solvent | TON <sup>[c]</sup> |
|------------------|----------|-------------------------|------------------|----------------------------------------------------------------------------------------------------|---------|--------------------|
| 1                | <b>2</b> | <i>p</i> -TsOH (1.5)    | 140              | 20/60                                                                                              | THF     | 152                |
| 2                | <b>2</b> | <i>p</i> -TsOH (2.0)    | 140              | 20/60                                                                                              | THF     | 115                |
| 3                | <b>2</b> | MSA (1.0)               | 140              | 20/60                                                                                              | THF     | 61                 |
| 4                | <b>2</b> | MSA (1.5)               | 140              | 20/60                                                                                              | THF     | 68                 |
| 5                | <b>2</b> | MSA (2.0)               | 140              | 20/60                                                                                              | THF     | 20                 |
| 6                | <b>2</b> | HNTf <sub>2</sub> (1.0) | 140              | 20/60                                                                                              | dioxane | 194                |
| 7                | <b>2</b> | HNTf <sub>2</sub> (1.0) | 140              | 20/60                                                                                              | toluene | 11                 |
| 8 <sup>[d]</sup> | <b>2</b> | HNTf <sub>2</sub> (1.0) | 140              | 20/60                                                                                              | 2-MTHF  | 295                |
| 9 <sup>[e]</sup> | <b>2</b> | HNTf <sub>2</sub> (1.0) | 140              | 20/60                                                                                              | 2-MTHF  | 403                |

[a] Reaction conditions: Catalyst (25 μmol), 2.08 mL solvent, 24 h; [b] = at room temperature; [c] TON = mmol MeOH/mmol catalyst; [d] 12.5 μmol catalyst; [e] 6.3 μmol catalyst.

## 9 DFT Calculations

### 9.1 Computational Details

All calculations in this work were carried out with the Gaussian09 program series (Revision C.01 and D.01).<sup>7</sup>

Gas phase calculations:

The geometries of all structures were optimised with no constraints or restraints using the M06-L density functional<sup>8</sup> and the def2-SVP<sup>9</sup> basis set with the associated ECP<sup>10</sup> for ruthenium. The automatic density fitting approximation was activated.<sup>11</sup> The structures were characterised by frequency calculations to be local minima ( $i = 0$ ) or transition states ( $i = 1$ ). The obtained energies are listed in Table S2 below. For most of the optimised transition states IRC calculations were performed to ensure the transition state to connect the independently localised local minima. Thermochemical corrections were computed for standard state conditions. Additionally, single point energies were obtained on the M06-L def2-TZVP level of theory. The thermochemical corrections from the lower-level geometry optimisations were added to the electronic energies of the higher-level single-point calculations to arrive at corrected values for the Gibbs free energies. These are listed in Table S2 and are used for the discussion in the main text and in the figures in the main text. Figure 3 of the main manuscript is repeated here (Figure 38) to show three additional high energy pathways leading from **I** to **VIII**.

Solvent phase calculations:

While the study was ongoing Gaussian09 in Revision D.01 became available to us, which contains the MN12-L density functional. MN12-L has been tested to describe transition metal thermochemistry very accurately<sup>12</sup>. Accordingly, solvent phase calculations were calculated using MN12-L. The geometries of selected gas phase structures were optimised with no constraints or restraints using the MN12-L density functional and the def2-TZVP basis set<sup>9</sup> with the associated ECP<sup>10</sup> for ruthenium. The automatic density fitting approximation was activated.<sup>11</sup> Solvent effects (THF) were considered implicitly by applying the IEF-PCM as well as the CPCM<sup>13</sup> formalism. The structures were characterised by frequency calculations to be local minima ( $i = 0$ ) or transition states ( $i = 1$ ). Thermochemical corrections were computed for a temperature of 413.15 K. A pressure of 302 atm was specified to account for entropy corrections in the condensed phase as was described elsewhere.<sup>14</sup> The obtained energies are listed in Table S3 below.

## 9.2 Hydrogenation of CO<sub>2</sub> to Methanediolate

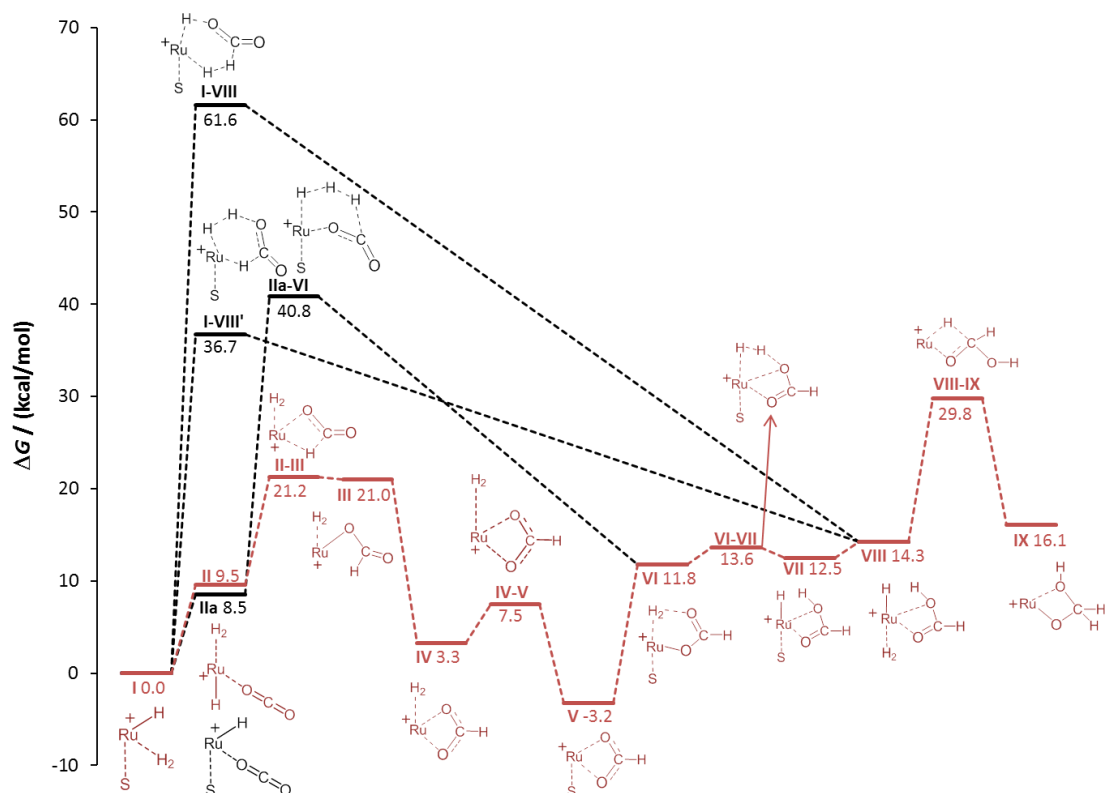

**Figure 38:** Calculated reaction pathways generating formic acid complex VIII and methanediolate complex IX. The Triphos ligand is omitted for clarity, S = THF.

## 9.3 Cleavage of the C-O bond and generation of formaldehyde – Protonolysis within the coordination sphere of Ru

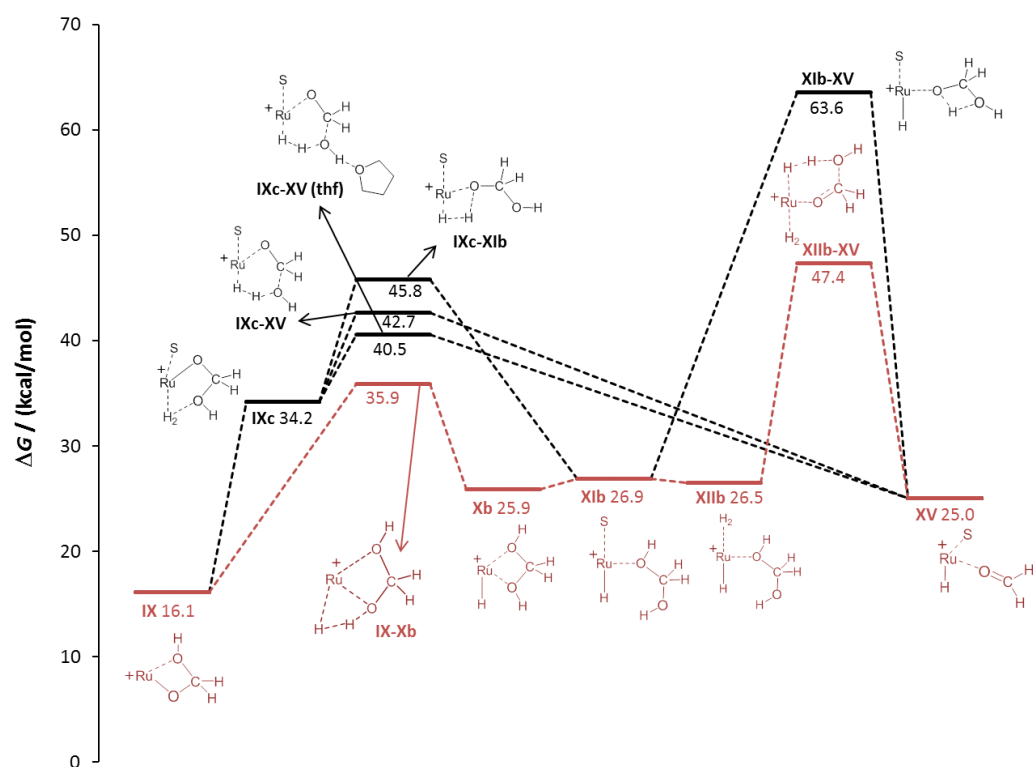

**Figure 39:** Calculated reaction pathways generating formaldehyde complex XV via intramolecular proton transfer. The Triphos ligand is omitted for clarity, S = THF.

*Cleavage of the C-O bond and generation of formaldehyde (IX – XV; Figure 39):* In addition to the external proton transfer (as shown in Figure 4 in the main manuscript), direct protonolysis within the coordination sphere through heterolytic cleavage of the coordinated H<sub>2</sub>-molecule was also investigated (Figure 39, ESI). Addition of H<sub>2</sub> to **IX** and heterolytic H<sub>2</sub> cleavage *via* the four-membered transition state **TSIX-Xb** (35.9 kcal/mol) leads to complex **Xb** (25.9 kcal/mol) with the resulting hydroxymethanolate coordinating to the metal via both oxygen atoms. After dissociation of one hydroxy group from the metal the vacant coordination site in **Xb** can either be occupied by solvent (**XIb**, 26.9 kcal/mol) or by H<sub>2</sub> (**XIIb**, 26.5 kcal/mol). Subsequently, the proton of one OH group transfers to the classical hydride centre of **XIIb** forming a H<sub>2</sub> molecule, while the second hydroxy group accepts a proton from the H<sub>2</sub> molecule at the metal centre. The transition state **TSXIIb-XV** leading to the C-O cleavage under formation of water defines the highest point of this energy profile (47.4 kcal/mol). The water molecule dissociates from the complex to give the formaldehyde complex **XV** (25.0 kcal/mol), in which solvent again has taken the place of the H<sub>2</sub> molecule. An alternative intramolecular pathway for the proton transfer from the free OH group in complex **XIb** to the coordinated OH would have to pass *via* **TSXIb-XV** at 63.6 kcal/mol, ruling this pathway out.

As complex **XV** comprises a coordinated THF molecule, pathways where the solvent molecule interacts with the active centre from the beginning were also investigated. Coordination of THF to **IX** results in **IXc** (34.2 kcal/mol). The intermediate **XIb** is reached from there over a barrier of 45.8 kcal/mol and still requires passing through the following high barrier for the C-O cleavage. However, starting from **IXc** also offers the possibility to lead the system directly *via* **TSIXc-XV** to complex **XV** (25.0 kcal/mol). The transition state **TSIXc-XV** involves the proton transfer together with the C-O bond cleavage and resides at a height of 42.7 kcal/mol on the hyper surface. Involving an additional THF molecule to assist the intramolecular proton transfer by forming a hydrogen bridge lowers the barrier even further to 40.5 kcal/mol in **TSIXc-XV(thf)**.

## 9.4 Influence of the coordination geometry (facial vs. meridional)

To obtain an impression of how large the influence of the coordination geometry (fac or mer) is on one of the key steps of the catalytic cycle presented in the main manuscript we constructed a model ligand, being similar to Triphos chemically, however, with no interconnected carbon backbone to allow for the setup of calculations in the facial and the meridional coordination mode. When three of such  $\text{P(Ph)}_2(\text{Me})$  model ligands are used to construct the complexes which correspond to the structures **VIII**, **TSVIII-IX** and **XI** (Figure 3 in the main paper), the barrier heights for the facial and the meridional reaction pathways can be computed independently. It is interesting to note that the model complex in the facial coordination mode generates a barrier height of ca. 15 kcal/mol for the transfer of the ruthenium bound hydride centre to the carbon atom of the formic acid molecule leading to the methandiolate complex **IX**. This is in very nice accordance with the barrier computed for the Triphos complex indicating the model ligand not to change the electronic and steric requirements markedly. If, however, the same reaction is computed for the meridional case the barrier height has a value of ca. 40 kcal/mol. This finding corroborates nicely the assumption that it is the facial coordination mode of Triphos which creates the necessary electronic and spatial requirements for the reaction to proceed at comparatively low barriers.

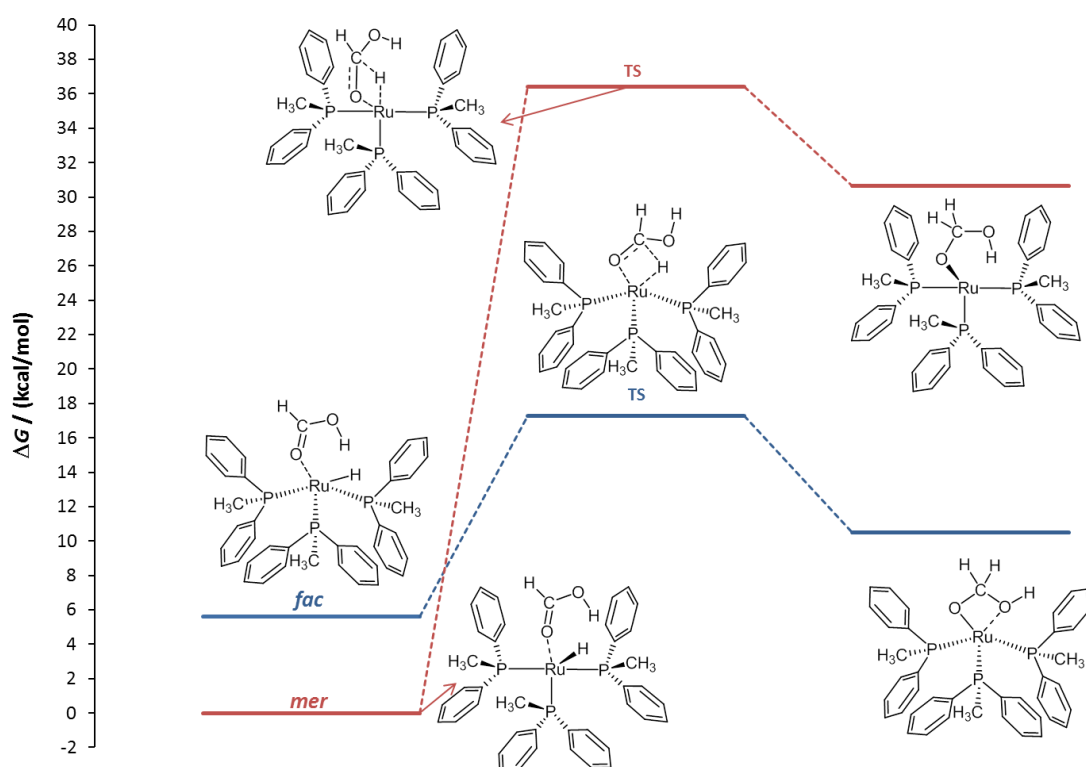

**Figure 40:** Recalculation of the structures **VIII**, **TSVIII-IX** and **XI** (Figure 3 in the main paper) using  $\text{P(Ph)}_2(\text{Me})$  as model ligand to compare meridional with facial coordination.





## 9.5 Calculated Energies

**Table S2.** Calculated energies of the optimised structures (M06-L/def2-SVP) and single point energies (M06-L/def2TZVP) in Hartree and relative Gibbs free energies  $G_{rel}$  (kcal/mol) belonging to Figures 3-5 in the main text and to Figure 38 and 39 in the ESI.

| Compd.                                    | $E$          | $E_{zpe}$    | $H$          | $G$          | $A$       | $E(\text{def2-TZVP})$ | $E(\text{def2-TZVP})+A$ | $G_{rel}$ |
|-------------------------------------------|--------------|--------------|--------------|--------------|-----------|-----------------------|-------------------------|-----------|
| <i>Figure 3 main text + Figure 38 ESI</i> |              |              |              |              | $G-E$     |                       | $G(\text{def2-TZVP})$   |           |
| I                                         | -2937.206033 | -2936.377217 | -2936.328731 | -2936.458045 | 0.747988  | -2939.482418          | -2938.734430            | 0.0       |
| I-VIII                                    | -3125.563800 | -3124.725010 | -3124.673634 | -3124.809075 | 0.754725  | -3128.053256          | -3127.298531            | 61.6      |
| I-VIII'                                   | -3125.610071 | -3124.767369 | -3124.716309 | -3124.850186 | 0.7598852 | -3128.098067          | -3127.338182            | 36.7      |
| Ila                                       | -3124.458009 | -3123.633709 | -3123.581939 | -3123.719914 | 0.738094  | -3126.948137          | -3126.210043            | 8.5       |
| II                                        | -2893.374980 | -2892.652286 | -2892.605887 | -2892.731434 | 0.643546  | -2895.614406          | -2894.970859            | 9.5       |
| Ila-VI                                    | -3125.597431 | -3124.758624 | -3124.707247 | -3124.842332 | 0.755099  | -3128.086784          | -3127.331685            | 40.8      |
| II-III                                    | -2893.356804 | -2892.635432 | -2892.589702 | -2892.713490 | 0.643314  | -2895.595541          | -2894.952227            | 21.2      |
| III                                       | -2893.358934 | -2892.635158 | -2892.589129 | -2892.714388 | 0.644546  | -2895.597173          | -2894.952627            | 21.0      |
| IV                                        | -2893.392334 | -2892.665937 | -2892.620231 | -2892.743098 | 0.649236  | -2895.630074          | -2894.980839            | 3.3       |
| IV-V                                      | -2893.376549 | -2892.654674 | -2892.608094 | -2892.731850 | 0.644699  | -2895.618784          | -2894.974085            | 7.5       |
| V                                         | -3124.490276 | -3123.661103 | -3123.610669 | -3123.742931 | 0.747345  | -3126.976054          | -3126.228709            | -3.2      |
| VI                                        | -3125.652190 | -3124.806393 | -3124.754952 | -3124.890142 | 0.762048  | -3128.139997          | -3127.377949            | 11.8      |
| VI-VII                                    | -3125.649428 | -3124.805717 | -3124.754801 | -3124.888337 | 0.761091  | -3128.136126          | -3127.375035            | 13.6      |
| VII                                       | -3125.652301 | -3124.805299 | -3124.753894 | -3124.889608 | 0.762693  | -3128.139533          | -3127.376840            | 12.5      |
| VIII                                      | -2894.565787 | -2893.820128 | -2893.773759 | -2893.898708 | 0.667079  | -2896.803519          | -2896.136440            | 14.3      |
| VIII-IX                                   | -2894.535099 | -2893.790785 | -2893.744679 | -2893.869210 | 0.665889  | -2895.588049          | -2894.938634            | 29.8      |
| IX                                        | -2894.547663 | -2893.798549 | -2893.752559 | -2893.875654 | 0.672009  | -2895.614582          | -2894.960368            | 16.1      |
| <i>Figure 4</i>                           |              |              |              |              |           |                       |                         |           |
| X                                         | -3122.295391 | -3121.499208 | -3121.448289 | -3121.582862 | 0.712529  | -3124.785699          | -3124.073170            | 17.8      |
| X-XI                                      | -3047.094244 | -3046.313073 | -3046.262588 | -3046.396804 | 0.697440  | -3124.767558          | -3124.058387            | 27.1      |
| XI                                        | -3122.306312 | -3121.513793 | -3121.461313 | -3121.597752 | 0.708560  | -3124.799505          | -3124.090945            | 6.7       |
| XII                                       | -3045.936148 | -3045.168599 | -3045.119094 | -3045.250846 | 0.685302  | -3048.341539          | -3047.656237            | 3.9       |
| XIII                                      | -3048.305615 | -3047.497405 | -3047.446102 | -3047.579741 | 0.725874  | -3049.502956          | -3048.803106            | 20.3      |

|                   |              |              |              |              |          |              |              |      |
|-------------------|--------------|--------------|--------------|--------------|----------|--------------|--------------|------|
| <b>XIII-XIV</b>   | -3047.094244 | -3046.313073 | -3046.262588 | -3046.396804 | 0.697440 | -3049.499977 | -3048.802538 | 20.7 |
| <b>XIV</b>        | -3047.099824 | -3046.314356 | -3046.263661 | -3046.398241 | 0.701583 | -3049.505590 | -3048.804008 | 19.8 |
| <b>Xa</b>         | -2969.753251 | -2968.994888 | -2968.947252 | -2969.075221 | 0.678030 | -2972.075504 | -2971.397473 | 17.4 |
| <b>Xa-XIa</b>     | -2969.731847 | -2968.977641 | -2968.930300 | -2969.057648 | 0.674199 | -2972.056166 | -2971.381967 | 27.2 |
| <b>XIa</b>        | -2969.730178 | -2968.976287 | -2968.927121 | -2969.057140 | 0.673038 | -2972.057314 | -2971.384276 | 25.7 |
| <b>XIIa</b>       | -2893.353148 | -2892.624575 | -2892.578229 | -2892.702284 | 0.650864 | -2895.593176 | -2894.942312 | 27.5 |
| <b>XIIIa</b>      | -2894.531684 | -2893.786880 | -2893.739380 | -2893.865223 | 0.666461 | -2896.773001 | -2896.106540 | 33.0 |
| <b>XIIIa-XIVa</b> | -2894.517126 | -2893.774311 | -2893.727215 | -2893.853838 | 0.663288 | -2896.756828 | -2896.093539 | 41.2 |
| <b>XIVa</b>       | -2894.548351 | -2893.800752 | -2893.753059 | -2893.880274 | 0.668077 | -2896.786055 | -2896.117979 | 25.9 |
| <b>XV</b>         | -3050.445334 | -3049.604789 | -3049.553569 | -3049.688590 | 0.756744 | -3052.847471 | -3052.090727 | 25.0 |

Figure 39  
(ESI)

|                    |              |              |              |              |          |              |              |      |
|--------------------|--------------|--------------|--------------|--------------|----------|--------------|--------------|------|
| <b>IXc</b>         | -3126.812801 | -3125.943433 | -3125.891497 | -3126.027040 | 0.785761 | -3129.301136 | -3128.515375 | 34.2 |
| <b>IXc-XIb</b>     | -3126.792706 | -3125.925410 | -3125.873802 | -3126.008444 | 0.784262 | -3129.281094 | -3128.496832 | 45.8 |
| <b>IXc-XV</b>      | -3126.795397 | -3125.929800 | -3125.878194 | -3126.013302 | 0.782095 | -3129.283919 | -3128.501823 | 42.7 |
| <b>IXc-XV(thf)</b> | -3359.066872 | -3358.082404 | -3358.024660 | -3358.175119 | 0.891753 | -3361.807648 | -3360.915896 | 40.5 |
| <b>IX-Xb</b>       | -2894.534095 | -2893.787273 | -2893.741592 | -2893.864628 | 0.669467 | -2896.771468 | -2896.102002 | 35.9 |
| <b>Xb</b>          | -2894.552571 | -2893.801254 | -2893.754809 | -2893.880025 | 0.672546 | -2896.790529 | -2896.117983 | 25.9 |
| <b>XIb</b>         | -3126.826178 | -3125.954887 | -3125.902907 | -3126.038873 | 0.787305 | -3129.314297 | -3128.526993 | 26.9 |
| <b>XIIb</b>        | -2895.74208  | -2894.97244  | -2894.92544  | -2895.05163  | 0.690447 | -2897.980522 | -2897.290074 | 26.5 |
| <b>XIIb-XV</b>     | -2895.70289  | -2894.9393   | -2894.89293  | -2895.01609  | 0.686802 | -2897.942088 | -2897.255286 | 47.4 |
| <b>XIb-XV</b>      | -3126.759289 | -3125.894222 | -3125.842540 | -3125.977625 | 0.781664 | -3129.250204 | -3128.468540 | 63.6 |

Figure 5

|                   |              |              |              |              |          |              |              |      |
|-------------------|--------------|--------------|--------------|--------------|----------|--------------|--------------|------|
| <b>XVI</b>        | -2819.360950 | -2818.621027 | -2818.575669 | -2818.697653 | 0.663297 | -2821.514022 | -2820.850725 | 26.6 |
| <b>XVI-XVII</b>   | -2819.359250 | -2818.620448 | -2818.575471 | -2818.696252 | 0.662998 | -2821.512537 | -2820.849538 | 27.3 |
| <b>XVII</b>       | -2819.370717 | -2818.628213 | -2818.583030 | -2818.704478 | 0.666239 | -2821.524706 | -2820.858467 | 21.7 |
| <b>XVIII</b>      | -3051.643214 | -3050.780277 | -3050.729073 | -3050.862471 | 0.780743 | -3054.049031 | -3053.268288 | 22.3 |
| <b>XVIII-XXIV</b> | -3051.629367 | -3050.766996 | -3050.716491 | -3050.848366 | 0.781001 | -3054.034649 | -3053.253648 | 31.5 |
| <b>XXIV</b>       | -3051.659474 | -3050.794347 | -3050.742536 | -3050.878892 | 0.780582 | -3054.063947 | -3053.283365 | 12.8 |
| <b>XXIV-I'</b>    | -2937.181830 | -2936.358698 | -2936.308973 | -2936.440486 | 0.741344 | -2939.463054 | -2938.721710 | 22.1 |
| <b>XIX</b>        | -3050.475611 | -3049.629833 | -3049.579311 | -3049.712369 | 0.763242 | -3052.880069 | -3052.116827 | 8.7  |
| <b>XX</b>         | -3047.139895 | -3046.349904 | -3046.299957 | -3046.431450 | 0.708445 | -3049.545136 | -3048.836691 | -0.7 |

|                       |              |              |              |              |           |              |              |      |
|-----------------------|--------------|--------------|--------------|--------------|-----------|--------------|--------------|------|
| XX-XXI                | -3047.139146 | -3046.351866 | -3046.302268 | -3046.433142 | 0.706004  | -3049.544722 | -3048.838719 | -2.0 |
| XXI                   | -3047.139664 | -3046.350021 | -3046.299614 | -3046.433274 | 0.706390  | -3049.545365 | -3048.838975 | -2.2 |
| XXII                  | -3048.317422 | -3047.508944 | -3047.457974 | -3047.591403 | 0.726019  | -3050.724144 | -3049.998125 | 6.6  |
| XXII-XXIII            | -3048.315166 | -3047.509617 | -3047.458652 | -3047.593185 | 0.721981  | -3050.720939 | -3049.998958 | 6.1  |
| XXIII                 | -3048.320936 | -3047.511165 | -3047.459891 | -3047.595636 | 0.725300  | -3050.726790 | -3050.001490 | 4.5  |
| <b>H<sub>2</sub></b>  | -1.167208    | -1.157176    | -1.153871    | -1.168693    | -0.001485 | -1.171647    | -1.173133    |      |
| <b>H<sub>2</sub>O</b> | -76.350531   | -76.328864   | -76.325085   | -76.346517   | 0.004014  | -76.443229   | -76.439215   |      |
| <b>CO<sub>2</sub></b> | -188.435335  | -188.423309  | -188.419749  | -188.444004  | -0.008669 | -188.653625  | -188.662294  |      |
| <b>THF</b>            | -232.243090  | -232.126405  | -232.120623  | -232.154325  | 0.088764  | -232.499422  | -232.410657  |      |
| <b>MeOH</b>           | -115.613822  | -115.562421  | -115.558169  | -115.585137  | 0.028685  | -115.748665  | -115.719980  |      |

### Comment on the endergonicity of the net reaction $\text{CO}_2 + 3 \text{H}_2 \rightarrow \text{H}_3\text{COH} + \text{H}_2\text{O}$

The M06-L/def2-TZVP//M06-L/def2-SVP values for the above mentioned net reaction generates a reaction Gibbs free energy of 14.5 kcal/mol, i.e. an endergonic reaction, which is counter intuitive with regard to the fact that the reaction should have a negative Gibbs free reaction energy. However, it should be noted that these computed values are values for gas phase reactions which for the general understanding and implementation of a transition metal complex catalysed reaction mechanism in most cases serve sufficiently well. While the small molecules  $\text{CO}_2$ ,  $\text{H}_2$ ,  $\text{H}_3\text{COH}$  and  $\text{H}_2\text{O}$  can easily be reoptimised in the solvent (see Table S3) this is by no means a fast approach for the reoptimisation of all of the molecules of the rather complex reaction pathway scenario outlined in Figures 3 to 5 of the main text and Figure 39 in the ESI. We have therefore restricted the general discussion to the gas phase energy profiles and refer the reader to the fact that a recomputation in the solvent phase most likely would generate energy profiles which are shifted relative to the ones being presented here, while the relative energy differences between the various intermediates and transition states will most likely not change markedly. However, for completeness we have recalculated the net reaction with the MN12-L density functional using the IEF-PCM and the CPCM continuum model and the IEF-PCM additionally with a radii model recently developed by the Truhlar group.<sup>15</sup> The results demonstrate that the reaction is exergonic in accordance with experimental observation and with standard state thermodynamics (see Table S3). For comparison the gas phase energy values are also included in Table S3.

**Table S3.** Calculated energies of the optimised structures of the net reaction in the gas phase and in solvent phase with different methods and radii models (Hartree). Relative reaction free energies  $G_{rel}$  are given in kcal/mol.<sup>[a]</sup>

|                              | <i>E</i>    | <i>E<sub>zpe</sub></i> | <i>H</i>    | <i>G</i>    | <i>A</i>  | <i>E</i> (def2-TZVP) | <i>E</i> (def2-TZVP)+ <i>A</i> | <i>G<sub>rel</sub></i> (!') |
|------------------------------|-------------|------------------------|-------------|-------------|-----------|----------------------|--------------------------------|-----------------------------|
| <i>M06-L/def2-TZVP//</i>     |             |                        |             |             |           |                      |                                |                             |
| <i>M06-L/def2-SVP (gas)</i>  |             |                        |             |             |           |                      |                                |                             |
| H <sub>2</sub>               | -1.167208   | -1.157176              | -1.153871   | -1.168693   | -0.001485 | -1.171647            | -1.173133                      | 14.1                        |
| H <sub>2</sub> O             | -76.350531  | -76.328864             | -76.325085  | -76.346517  | 0.004014  | -76.443229           | -76.439215                     |                             |
| MeOH                         | -115.613822 | -115.562421            | -115.558169 | -115.585137 | 0.028685  | -115.748665          | -115.719980                    |                             |
| CO <sub>2</sub>              | -188.435335 | -188.423309            | -188.419749 | -188.444004 | -0.008669 | -188.653625          | -188.662294                    |                             |
| <i>M06-L/def2-TZVP (gas)</i> |             |                        |             |             |           |                      |                                |                             |
| H <sub>2</sub>               | -1.171714   | -1.161827              | -1.158522   | -1.173318   |           |                      |                                | 14.2                        |
| H <sub>2</sub> O             | -76.443285  | -76.421912             | -76.418133  | -76.439553  |           |                      |                                |                             |
| MeOH                         | -115.748941 | -115.697536            | -115.693261 | -115.720276 |           |                      |                                |                             |
| CO <sub>2</sub>              | -188.653662 | -188.641746            | -188.638197 | -188.662431 |           |                      |                                |                             |
| <hr/>                        |             |                        |             |             |           |                      |                                |                             |
| <i>MN12L/def2-TZVP (THF)</i> |             |                        |             |             |           |                      |                                |                             |
| <i>(ief-pcm)</i>             |             |                        |             |             |           |                      |                                |                             |
| H <sub>2</sub>               | -1.156961   | -1.146909              | -1.143605   | -1.153010   |           |                      |                                | -1.9                        |
| H <sub>2</sub> O             | -76.385907  | -76.364068             | -76.360289  | -76.376305  |           |                      |                                |                             |
| MeOH                         | -115.642896 | -115.590992            | -115.586714 | -115.608342 |           |                      |                                |                             |
| CO <sub>2</sub>              | -188.519245 | -188.507280            | -188.503729 | -188.522560 |           |                      |                                |                             |
| <i>MN12L/def2-TZVP (THF)</i> |             |                        |             |             |           |                      |                                |                             |
| <i>(ief-pcm, smd)</i>        |             |                        |             |             |           |                      |                                |                             |
| H <sub>2</sub>               | -1.156351   | -1.146326              | -1.143022   | -1.152429   |           |                      |                                | -4.1                        |
| H <sub>2</sub> O             | -76.386444  | -76.364749             | -76.360970  | -76.376990  |           |                      |                                |                             |
| MeOH                         | -115.643021 | -115.591364            | -115.587067 | -115.608730 |           |                      |                                |                             |
| CO <sub>2</sub>              | -188.518526 | -188.506598            | -188.503033 | -188.521883 |           |                      |                                |                             |
| <i>MN12L/def2-TZVP (THF)</i> |             |                        |             |             |           |                      |                                |                             |
| <i>(cpcm)</i>                |             |                        |             |             |           |                      |                                |                             |
| H <sub>2</sub>               | -1.156971   | -1.146920              | -1.143615   | -1.153020   |           |                      |                                | -2.2                        |
| H <sub>2</sub> O             | -76.386313  | -76.364474             | -76.360695  | -76.376712  |           |                      |                                |                             |
| MeOH                         | -115.643189 | -115.591295            | -115.587016 | -115.608646 |           |                      |                                |                             |
| CO <sub>2</sub>              | -188.519399 | -188.507437            | -188.503886 | -188.522717 |           |                      |                                |                             |

[a] According to tabulated values for standard state thermodynamics the net reaction of  $\text{CO}_2 + 3 \text{H}_2 \rightarrow \text{CH}_3\text{OH} + \text{H}_2\text{O}$  is exergonic by -2.1 kcal/mol.

## 10 X-Ray crystal structure of 4a

Intensity data were collected with a Bruker D8 goniometer equipped with a Bruker APEX CCD area detector and an Incoatec microsource (Mo-K $\alpha$  radiation,  $\lambda = 0.71073 \text{ \AA}$ , multilayer optics) at 100 K (Oxford Cryostream 700 instrument).

Crystal data for **4a**, C<sub>43</sub>H<sub>42</sub>O<sub>3</sub>P<sub>3</sub>Ru<sup>+</sup>C<sub>2</sub>F<sub>6</sub>NO<sub>4</sub>S<sub>2</sub><sup>-</sup> · CH<sub>2</sub>Cl<sub>2</sub>: monoclinic space group *P2*<sub>1</sub>, *a* = 12.731(2), *b* = 15.301(3), *c* = 13.247(2) Å,  $\beta = 109.038(3)^\circ$ , *V* = 109.038(3) Å<sup>3</sup>, *Z* = 2, 26352 reflections collected within  $\theta_{\text{max}} = 25.14^\circ$ , *R*<sub>int</sub> = 0.0998.

Data were integrated with SAINT<sup>16</sup> and corrected for absorption by multi-scan methods.<sup>17</sup> The structure was solved by direct methods (SHELXS-97) and refined by full matrix least squares procedures based on *F*<sup>2</sup> as implemented in SHELXL-97.<sup>18</sup> One of the trifluoromethylsulfonate groups in the anion was disordered over two positions, with a site occupancy of 0.599(5) for the majority conformer. A total of 24 similarity restraints for bond distances and angles in the alternative conformations were applied. C, F and O atoms in the minority conformer were treated as isotropic. Anisotropic displacement parameters were assigned to all other non-hydrogen atoms, and hydrogen atoms were treated as riding. Refinement of 647 variables based on 8701 independent data converged for *wR2* (all reflections) = 0.1212, *R1* (observed reflections) = 0.0571, *GOF* = 1.045 and a Flack enantiomorph polarity parameter<sup>19</sup> of -0.05(4).

## 11 Literature

- (1) S. Wesselbaum, T. vom Stein, J. Klankermayer, W. Leitner, *Angew. Chem.* **2012**, *124*, 7617-7620; *Angew. Chem. Int. Ed.* **2012**, *51*, 7499-7502.
- (2) A. B. Chaplin, P. J. Dyson, *Inorg. Chem.* **2008**, *47*, 381-390.
- (3) F. M. A. Geilen, B. Engendahl, M. Hölscher, J. Klankermayer, W. Leitner, *J. Am. Chem. Soc.* **2011**, *133*, 14349-14358.
- (4) J. Coetzee, D. L. Dodds, J. Klankermayer, S. Bronsinski, W. Leitner, A. M. Z. Slawin, D. J. Cole-Hamilton, *Chem. Eur. J.* **2013**, *19*, 11039-11050.
- (5) P. Scherl, A. Kruckenberg, S. Mader, H. Wadeh, L. H. Gade, *Organometallics* **2012**, *31*, 7024-7027.
- (6) L. F. Rhodes, C. Sorato, L. M. Venanzi, F. Bachechi, *Inorg. Chem.* **1988**, *27*, 604-610.
- (7) Gaussian 09, Revision C.01, M. J. Frisch, G. W. Trucks, H. B. Schlegel, G. E. Scuseria, M. A. Robb, J. R. Cheeseman, G. Scalmani, V. Barone, B. Mennucci, G. A. Petersson, H. Nakatsuji, M. Caricato, X. Li, H. P. Hratchian, A. F. Izmaylov, J. Bloino, G. Zheng, J. L. Sonnenberg, M. Hada, M. Ehara, K. Toyota, R. Fukuda, J. Hasegawa, M. Ishida, T. Nakajima, Y. Honda, O. Kitao, H. Nakai, T. Vreven, J. A. Montgomery, Jr., J. E. Peralta, F. Ogliaro, M. Bearpark, J. J. Heyd, E. Brothers, K. N. Kudin, V. N. Staroverov, T. Keith, R. Kobayashi, J. Normand, K. Raghavachari, A. Rendell, J. C. Burant, S. S. Iyengar, J. Tomasi, M. Cossi, N. Rega, J. M. Millam, M. Klene, J. E. Knox, J. B. Cross, V. Bakken, C. Adamo, J. Jaramillo, R. Gomperts, R. E. Stratmann, O. Yazyev, A. J. Austin, R. Cammi, C. Pomelli, J. W. Ochterski, R. L. Martin, K. Morokuma, V. G. Zakrzewski, G. A. Voth, P. Salvador, J. J. Dannenberg, S. Dapprich, A. D. Daniels, O. Farkas, J. B. Foresman, J. V. Ortiz, J. Cioslowski, and D. J. Fox, Gaussian, Inc., Wallingford CT, **2010**.
- (8) a) Y. Zhao, D. G. Truhlar, *J. Chem. Phys.* **2006**, *125*, 194101; b) Y. Zhao, D. G. Truhlar, *Theor. Chem.*

- Acc.* **2008**, *120*, 215–241; c) C. J. Cramer, D. G. Truhlar, *Phys. Chem. Chem. Phys.* **2009**, *11*, 10757 – 10816; d) B. B. Averkiev, Y. Zhao, D. G. Truhlar, *J. Mol. Catal. A* **2010**, *324*, 80– 88; e) A. D. Kulkarni, D. G. Truhlar, *J. Chem. Theory Comput.* **2011**, *7*, 2325 –2332.
- (9) a) A. Schäfer, H. Horn, R. Ahlrichs, *J. Chem. Phys.* **1992**, *97*, 2571; b) A. Schäfer, C. Huber, R. Ahlrichs, *J. Chem. Phys.* **1994**, *100*, 5829; c) K. Eichkorn, F. Weigend, O. Treutler, R. Ahlrichs, *Theor. Chem. Acc.* **1997**, *97*, 119 –124; d) F. Weigend, F. Furche, R. Ahlrichs, *J. Chem. Phys.* **2003**, *119*, 12753; e) F. Weigend, R. Ahlrichs, *Phys. Chem. Chem. Phys.* **2005**, *7*, 3297 –3305.
- (10) a) D. Andrae, U. Häußermann, M. Dolg, H. Stoll, H. Preuß, *Theor. Chim. Acta* **1990**, *77*, 123–141; b) B. Metz, H. Stoll, M. Dolg, *J. Chem. Phys.* **2000**, *113*, 2563.
- (11) a) B. I. Dunlap, *J. Chem. Phys.* **1983**, *78*, 3140; b) B. Dunlap, *J. Mol. Struct.* **2000**, *529*, 37–40.
- (12) R. Peverati, D. G. Truhlar, *Phys Chem Chem Phys* **2012**, *10*, 13171.
- (13) a) J. Tomasi, B. Mennucci, R. Cammi, *Chem. Rev.* **2005**, *105*, 2999–3093; b) E. Cancès, B. Mennucci, J. Tomasi, *J. Chem. Phys.* **1997**, *107*, 3032.
- (14) a) R. L. Martin, P. J. Hay, L. R. Pratt, *J. Phys. Chem. A* **1998**, *102*, 3565–3573; b) N. Sieffert, M. Bühl, *Inorg. Chem.* **2009**, *48*, 4622 – 4624
- (15) A. V. Marenich, C. J Cramer, D. G. Truhlar, *J. Phys. Chem. B.* **2009**, *113*, 6378-6396.
- (16) Bruker (2009) SAINT+. Version 7.68. Bruker AXS Inc., Madison, Wisconsin, USA.
- (17) Bruker (2001) SMART. Version 5.624. Bruker AXS Inc., Madison Wisconsin, USA.
- (18) G. M. Sheldrick, *Acta Crystallogr. A* **64** (2008) 112-122.
- (19) H. D. Flack, *Acta Crystallogr. A* **39** (1983) 876-881.

## 12 Appendix: XYZ Coordinates of the calculated structures (Gas)

### I

|    |           |           |           |
|----|-----------|-----------|-----------|
| H  | 4.217747  | 4.885684  | -1.803856 |
| H  | 4.537885  | 3.013760  | -3.415754 |
| C  | 3.752477  | 3.916132  | -1.614040 |
| C  | 3.929367  | 2.867929  | -2.520791 |
| H  | 2.847803  | 4.529731  | 0.250201  |
| C  | 2.990428  | 3.717530  | -0.466469 |
| C  | 3.340806  | 1.629484  | -2.282398 |
| H  | 3.517101  | 0.811887  | -2.987672 |
| H  | 6.571800  | -1.394723 | -0.276667 |
| H  | 6.179396  | -3.835541 | -0.562117 |
| H  | 0.067271  | 7.031497  | 0.877746  |
| H  | -0.041797 | 6.399863  | -1.526707 |
| C  | 2.390181  | 2.479503  | -0.231489 |
| C  | 5.564897  | -1.768680 | -0.473277 |
| C  | 5.344891  | -3.134982 | -0.633085 |
| C  | 2.551923  | 1.427081  | -1.137192 |
| H  | 4.695331  | 0.198379  | -0.432401 |
| C  | -0.120954 | 5.994255  | 0.592926  |
| C  | 4.502618  | -0.869408 | -0.562929 |
| C  | -0.181827 | 5.640560  | -0.754384 |
| H  | 1.780812  | 2.334734  | 0.662520  |
| C  | 4.053567  | -3.605932 | -0.870680 |
| H  | 3.866739  | -4.676634 | -0.978076 |
| H  | -0.265534 | 5.295228  | 2.633378  |
| C  | -0.306550 | 5.021551  | 1.576698  |
| C  | 3.205973  | -1.334191 | -0.818885 |
| H  | 1.729459  | -0.294423 | -3.257679 |
| C  | 2.990740  | -2.713407 | -0.952580 |
| C  | -0.423543 | 4.318110  | -1.123948 |
| H  | -0.467714 | 4.062672  | -2.185713 |
| H  | 0.430981  | 1.945355  | -2.471726 |
| H  | 1.978879  | -3.104151 | -1.089392 |
| H  | 0.172423  | 0.662131  | -4.806841 |
| P  | 1.756127  | -0.209146 | -0.856733 |
| C  | -0.546478 | 3.699905  | 1.210658  |
| C  | 1.006524  | -0.621680 | -2.494125 |
| C  | -0.602801 | 3.337653  | -0.141095 |
| H  | -0.686130 | 2.930727  | 1.976732  |
| H  | 0.991440  | -1.720561 | -2.563047 |
| H  | -0.348584 | -1.033864 | -4.767361 |
| C  | -0.521783 | 1.413702  | -2.321929 |
| C  | -0.537354 | -0.037287 | -4.341958 |
| H  | -1.250576 | 1.955679  | -2.940792 |
| C  | -0.390138 | -0.046567 | -2.818892 |
| H  | -1.551251 | 0.265466  | -4.642640 |
| P  | -0.967800 | 1.593044  | -0.545904 |
| Ru | -0.018549 | -0.097952 | 0.752111  |
| H  | -3.107517 | 1.895570  | -2.669156 |
| H  | -0.221117 | -5.806496 | 1.555674  |
| H  | -1.035669 | -3.488538 | 1.541550  |
| C  | -0.269755 | -5.261720 | 0.611066  |
| C  | -0.721416 | -3.946649 | 0.599748  |
| C  | -1.526929 | -0.928301 | -2.251300 |
| C  | -3.580460 | 1.813167  | -1.688610 |
| H  | -1.670027 | -1.815306 | -2.885004 |
| C  | -2.819353 | 1.634116  | -0.523602 |
| H  | -1.281034 | 0.433349  | 1.641141  |
| H  | 0.475398  | -6.910237 | -0.570525 |
| C  | 0.119137  | -5.878176 | -0.578284 |
| H  | -2.473456 | -0.372966 | -2.321317 |
| P  | -1.347002 | -1.466112 | -0.495438 |
| C  | -0.786343 | -3.216140 | -0.596176 |
| H  | -5.541068 | 2.011999  | -2.554823 |
| C  | -4.972086 | 1.881693  | -1.631882 |
| C  | 0.036417  | -5.174946 | -1.777484 |



|   |           |           |           |
|---|-----------|-----------|-----------|
| C | -0.413655 | -3.854167 | -1.788314 |
| C | -3.496590 | 1.559985  | 0.701871  |
| H | 0.320456  | -5.653818 | -2.716991 |
| H | -2.934403 | 1.420853  | 1.628702  |
| H | -0.467308 | -3.338104 | -2.749454 |
| C | -5.630068 | 1.789961  | -0.408308 |
| C | -3.056687 | -1.647243 | 0.135110  |
| C | -4.885050 | 1.638107  | 0.759682  |
| H | -2.419686 | -1.566520 | 2.205540  |
| H | -4.023835 | -1.774073 | -1.808352 |
| H | -6.720027 | 1.839996  | -0.364329 |
| C | -3.264868 | -1.691849 | 1.521249  |
| C | -4.154792 | -1.786040 | -0.723353 |
| H | -5.387066 | 1.568656  | 1.727130  |
| C | -4.545343 | -1.872228 | 2.037355  |
| C | -5.437896 | -1.947973 | -0.202694 |
| H | -4.692086 | -1.911114 | 3.118779  |
| H | -6.287154 | -2.045417 | -0.882513 |
| C | -5.635733 | -1.992825 | 1.176197  |
| H | -6.641389 | -2.125825 | 1.580649  |
| H | 1.265425  | -1.326593 | 0.653408  |
| C | 2.706670  | 0.646392  | 2.562498  |
| C | 1.789760  | 0.933211  | 4.700952  |
| C | 3.023862  | 1.291118  | 3.887214  |
| H | 3.219987  | 1.092618  | 1.699324  |
| H | 2.912707  | -0.437064 | 2.564340  |
| H | 1.646234  | 1.563518  | 5.587491  |
| H | 1.845301  | -0.112614 | 5.036706  |
| H | 3.122730  | 2.382548  | 3.772690  |
| H | 3.958382  | 0.915836  | 4.322676  |
| O | 1.280589  | 0.867115  | 2.392885  |
| C | 0.669788  | 1.089028  | 3.695126  |
| H | -0.145531 | 0.363356  | 3.829678  |
| H | 0.239935  | 2.104733  | 3.690715  |
| H | -0.096993 | -1.446986 | 2.090987  |
| C | 0.872192  | -2.000014 | 2.585751  |
| O | 0.761218  | -2.143319 | 3.776353  |
| O | 1.743070  | -2.303770 | 1.732972  |

**I-VIII**

|    |           |           |           |
|----|-----------|-----------|-----------|
| H  | 4.217747  | 4.885684  | -1.803856 |
| H  | 4.537885  | 3.013760  | -3.415754 |
| C  | 3.752477  | 3.916132  | -1.614040 |
| C  | 3.929367  | 2.867929  | -2.520791 |
| H  | 2.847803  | 4.529731  | 0.250201  |
| C  | 2.990428  | 3.717530  | -0.466469 |
| C  | 3.340806  | 1.629484  | -2.282398 |
| H  | 3.517101  | 0.811887  | -2.987672 |
| H  | 6.571800  | -1.394723 | -0.276667 |
| H  | 6.179396  | -3.835541 | -0.562117 |
| H  | 0.067271  | 7.031497  | 0.877746  |
| H  | -0.041797 | 6.399863  | -1.526707 |
| C  | 2.390181  | 2.479503  | -0.231489 |
| C  | 5.564897  | -1.768680 | -0.473277 |
| C  | 5.344891  | -3.134982 | -0.633085 |
| C  | 2.551923  | 1.427081  | -1.137192 |
| H  | 4.695331  | 0.198379  | -0.432401 |
| C  | -0.120954 | 5.994255  | 0.592926  |
| C  | 4.502618  | -0.869408 | -0.562929 |
| C  | -0.181827 | 5.640560  | -0.754384 |
| H  | 1.780812  | 2.334734  | 0.662520  |
| C  | 4.053567  | -3.605932 | -0.870680 |
| H  | 3.866739  | -4.676634 | -0.978076 |
| H  | -0.265534 | 5.295228  | 2.633378  |
| C  | -0.306550 | 5.021551  | 1.576698  |
| C  | 3.205973  | -1.334191 | -0.818885 |
| H  | 1.729459  | -0.294423 | -3.257679 |
| C  | 2.990740  | -2.713407 | -0.952580 |
| C  | -0.423543 | 4.318110  | -1.123948 |
| H  | -0.467714 | 4.062672  | -2.185713 |
| H  | 0.430981  | 1.945355  | -2.471726 |
| H  | 1.978879  | -3.104151 | -1.089392 |
| H  | 0.172423  | 0.662131  | -4.806841 |
| P  | 1.756127  | -0.209146 | -0.856733 |
| C  | -0.546478 | 3.699905  | 1.210658  |
| C  | 1.006524  | -0.621680 | -2.494125 |
| C  | -0.602801 | 3.337653  | -0.141095 |
| H  | -0.686130 | 2.930727  | 1.976732  |
| H  | 0.991440  | -1.720561 | -2.563047 |
| H  | -0.348584 | -1.033864 | -4.767361 |
| C  | -0.521783 | 1.413702  | -2.321929 |
| C  | -0.537354 | -0.037287 | -4.341958 |
| H  | -1.250576 | 1.955679  | -2.940792 |
| C  | -0.390138 | -0.046567 | -2.818892 |
| H  | -1.551251 | 0.265466  | -4.642640 |
| P  | -0.967800 | 1.593044  | -0.545904 |
| Ru | -0.018549 | -0.097952 | 0.752111  |
| H  | -3.107517 | 1.895570  | -2.669156 |
| H  | -0.221117 | -5.806496 | 1.555674  |
| H  | -1.035669 | -3.488538 | 1.541550  |
| C  | -0.269755 | -5.261720 | 0.611066  |
| C  | -0.721416 | -3.946649 | 0.599748  |
| C  | -1.526929 | -0.928301 | -2.251300 |
| C  | -3.580460 | 1.813167  | -1.688610 |
| H  | -1.670027 | -1.815306 | -2.885004 |
| C  | -2.819353 | 1.634116  | -0.523602 |
| H  | -1.281034 | 0.433349  | 1.641141  |
| H  | 0.475398  | -6.910237 | -0.570525 |
| C  | 0.119137  | -5.878176 | -0.578284 |
| H  | -2.473456 | -0.372966 | -2.321317 |
| P  | -1.347002 | -1.466112 | -0.495438 |
| C  | -0.786343 | -3.216140 | -0.596176 |
| H  | -5.541068 | 2.011999  | -2.554823 |
| C  | -4.972086 | 1.881693  | -1.631882 |
| C  | 0.036417  | -5.174946 | -1.777484 |
| C  | -0.413655 | -3.854167 | -1.788314 |
| C  | -3.496590 | 1.559985  | 0.701871  |
| H  | 0.320456  | -5.653818 | -2.716991 |
| H  | -2.934403 | 1.420853  | 1.628702  |
| H  | -0.467308 | -3.338104 | -2.749454 |
| C  | -5.630068 | 1.789961  | -0.408308 |

|   |           |           |           |
|---|-----------|-----------|-----------|
| C | -3.056687 | -1.647243 | 0.135110  |
| C | -4.885050 | 1.638107  | 0.759682  |
| H | -2.419686 | -1.566520 | 2.205540  |
| H | -4.023835 | -1.774073 | -1.808352 |
| H | -6.720027 | 1.839996  | -0.364329 |
| C | -3.264868 | -1.691849 | 1.521249  |
| C | -4.154792 | -1.786040 | -0.723353 |
| H | -5.387066 | 1.568656  | 1.727130  |
| C | -4.545343 | -1.872228 | 2.037355  |
| C | -5.437896 | -1.947973 | -0.202694 |
| H | -4.692086 | -1.911114 | 3.118779  |
| H | -6.287154 | -2.045417 | -0.882513 |
| C | -5.635733 | -1.992825 | 1.176197  |
| H | -6.641389 | -2.125825 | 1.580649  |
| H | 1.265425  | -1.326593 | 0.653408  |
| C | 2.706670  | 0.646392  | 2.562498  |
| C | 1.789760  | 0.933211  | 4.700952  |
| C | 3.023862  | 1.291118  | 3.887214  |
| H | 3.219987  | 1.092618  | 1.699324  |
| H | 2.912707  | -0.437064 | 2.564340  |
| H | 1.646234  | 1.563518  | 5.587491  |
| H | 1.845301  | -0.112614 | 5.036706  |
| H | 3.122730  | 2.382548  | 3.772690  |
| H | 3.958382  | 0.915836  | 4.322676  |
| O | 1.280589  | 0.867115  | 2.392885  |
| C | 0.669788  | 1.089028  | 3.695126  |
| H | -0.145531 | 0.363356  | 3.829678  |
| H | 0.239935  | 2.104733  | 3.690715  |
| H | -0.096993 | -1.446986 | 2.090987  |
| C | 0.872192  | -2.000014 | 2.585751  |
| O | 0.761218  | -2.143319 | 3.776353  |
| O | 1.743070  | -2.303770 | 1.732972  |

# I-VIII'

|    |           |           |           |
|----|-----------|-----------|-----------|
| H  | -5.500702 | -3.667950 | -1.725949 |
| H  | -5.066587 | -2.050069 | -3.569487 |
| C  | -4.759797 | -2.876347 | -1.595648 |
| C  | -4.514156 | -1.972390 | -2.630675 |
| H  | -4.241996 | -3.464621 | 0.417368  |
| C  | -4.059677 | -2.760540 | -0.397777 |
| C  | -3.570035 | -0.961550 | -2.468338 |
| H  | -3.415309 | -0.252455 | -3.286197 |
| H  | -5.789285 | 3.194244  | -0.848345 |
| H  | -4.615197 | 5.258216  | -0.101474 |
| H  | -2.149713 | -6.535027 | 1.424251  |
| H  | -1.903206 | -6.164490 | -1.024134 |
| C  | -3.108256 | -1.753087 | -0.236546 |
| C  | -4.704012 | 3.193216  | -0.726636 |
| C  | -4.045919 | 4.350213  | -0.310787 |
| C  | -2.848804 | -0.841377 | -1.268356 |
| H  | -4.524601 | 1.123976  | -1.281591 |
| C  | -1.647298 | -5.638769 | 1.054498  |
| C  | -3.986377 | 2.025189  | -0.979358 |
| C  | -1.509134 | -5.431319 | -0.317097 |
| H  | -2.547446 | -1.685455 | 0.698001  |
| C  | -2.661425 | 4.338939  | -0.149040 |
| H  | -2.134428 | 5.229354  | 0.199864  |
| H  | -1.232677 | -4.864298 | 3.030170  |
| C  | -1.135232 | -4.702474 | 1.954152  |
| C  | -2.591712 | 2.007488  | -0.828214 |
| H  | -1.542634 | 0.435160  | -3.459249 |
| C  | -1.940182 | 3.175872  | -0.403732 |
| C  | -0.868312 | -4.289102 | -0.795421 |
| H  | -0.774535 | -4.148400 | -1.874924 |
| H  | -0.859397 | -2.010741 | -2.395510 |
| H  | -0.859691 | 3.178126  | -0.246567 |
| H  | -0.257385 | -1.076714 | -4.816651 |
| P  | -1.595412 | 0.483779  | -1.025929 |
| C  | -0.494500 | -3.561746 | 1.478818  |
| C  | -0.790361 | 0.617282  | -2.677800 |
| C  | -0.360754 | -3.341560 | 0.101492  |
| H  | -0.091736 | -2.826214 | 2.182385  |
| H  | -0.491686 | 1.669358  | -2.802212 |
| H  | 0.672902  | 0.430896  | -4.921018 |
| C  | 0.187456  | -1.707538 | -2.238314 |
| C  | 0.596682  | -0.529933 | -4.391222 |
| H  | 0.786065  | -2.467985 | -2.760283 |
| C  | 0.424693  | -0.319723 | -2.886006 |
| H  | 1.507138  | -1.105470 | -4.614739 |
| P  | 0.512003  | -1.823126 | -0.425011 |
| Ru | -0.001096 | 0.127610  | 0.640902  |
| H  | 2.590751  | -2.924397 | -2.358502 |
| H  | 1.634681  | 5.594407  | 1.137823  |
| H  | 1.927840  | 3.159334  | 1.254583  |
| C  | 1.539260  | 5.000105  | 0.226995  |
| C  | 1.697051  | 3.619622  | 0.290415  |
| C  | 1.730733  | 0.305385  | -2.351677 |
| C  | 3.022722  | -2.845112 | -1.358486 |
| H  | 2.099910  | 1.077748  | -3.043002 |
| C  | 2.273889  | -2.353461 | -0.279478 |
| H  | 1.161903  | -0.236344 | 1.938442  |
| H  | 1.130884  | 6.698668  | -1.045949 |
| C  | 1.258279  | 5.615521  | -0.993523 |
| H  | 2.505611  | -0.475488 | -2.347927 |
| P  | 1.671412  | 1.000048  | -0.643509 |
| C  | 1.564722  | 2.824611  | -0.859453 |
| H  | 4.913626  | -3.620094 | -2.037614 |
| C  | 4.347214  | -3.244624 | -1.182685 |
| C  | 1.153665  | 4.842412  | -2.147247 |
| C  | 1.306037  | 3.456820  | -2.083120 |
| C  | 2.882728  | -2.296013 | 0.982298  |
| H  | 0.951995  | 5.317027  | -3.109736 |
| H  | 2.324776  | -1.914955 | 1.841708  |
| H  | 1.223617  | 2.884368  | -3.009502 |

|   |           |           |           |
|---|-----------|-----------|-----------|
| C | 4.942184  | -3.169981 | 0.074424  |
| C | 3.386902  | 0.806923  | -0.008214 |
| C | 4.202838  | -2.699927 | 1.158670  |
| H | 2.834702  | 1.278632  | 2.040766  |
| H | 4.308847  | 0.341069  | -1.924754 |
| H | 5.980799  | -3.479001 | 0.209659  |
| C | 3.645928  | 1.031139  | 1.352576  |
| C | 4.460622  | 0.498871  | -0.855032 |
| H | 4.658145  | -2.637492 | 2.149372  |
| C | 4.942078  | 0.940456  | 1.852795  |
| C | 5.755425  | 0.395598  | -0.347733 |
| H | 5.122358  | 1.124028  | 2.914044  |
| H | 6.577779  | 0.146475  | -1.022055 |
| C | 6.000320  | 0.613629  | 1.005914  |
| H | 7.015990  | 0.535923  | 1.399515  |
| H | 0.936521  | 0.508052  | 2.465731  |
| C | -2.822972 | 0.559913  | 2.239972  |
| C | -2.188560 | 0.058036  | 4.464519  |
| C | -3.412239 | 0.384273  | 3.622022  |
| H | -3.490943 | 0.241514  | 1.424281  |
| H | -2.516397 | 1.601089  | 2.045494  |
| H | -2.429341 | -0.432876 | 5.415845  |
| H | -1.612324 | 0.967716  | 4.692111  |
| H | -4.127805 | -0.452532 | 3.637324  |
| H | -3.947715 | 1.281404  | 3.956466  |
| O | -1.637142 | -0.285683 | 2.213594  |
| C | -1.404988 | -0.833859 | 3.534678  |
| H | -0.321919 | -0.841406 | 3.717479  |
| H | -1.776527 | -1.874413 | 3.548409  |
| H | -0.257562 | 1.896706  | 1.458880  |
| C | -0.124070 | 2.287870  | 2.577023  |
| O | -0.743463 | 3.292276  | 2.818117  |
| O | 0.656120  | 1.567948  | 3.271111  |

**Ila**

|    |           |           |           |
|----|-----------|-----------|-----------|
| H  | 3.057147  | -5.988933 | -0.829991 |
| H  | 1.786653  | -5.341357 | -2.872114 |
| C  | 2.335425  | -5.170221 | -0.790444 |
| C  | 1.626770  | -4.805573 | -1.933880 |
| H  | 2.652867  | -4.773268 | 1.309118  |
| C  | 2.108501  | -4.489226 | 0.405005  |
| C  | 0.702623  | -3.761290 | -1.887493 |
| H  | 0.158605  | -3.514548 | -2.801790 |
| H  | -4.940652 | -4.282618 | -1.274023 |
| H  | -5.322508 | -4.700081 | 1.150627  |
| H  | 6.840225  | -2.010183 | -0.212287 |
| H  | 5.014366  | -3.240533 | -1.384325 |
| C  | 1.190624  | -3.443292 | 0.450247  |
| C  | -4.239787 | -3.891560 | -0.533262 |
| C  | -4.453073 | -4.125709 | 0.823718  |
| C  | 0.482615  | -3.054973 | -0.696368 |
| H  | -2.982725 | -3.003048 | -2.025842 |
| C  | 5.866389  | -1.539162 | -0.361335 |
| C  | -3.130254 | -3.159725 | -0.954732 |
| C  | 4.846120  | -2.226179 | -1.014975 |
| H  | 1.022906  | -2.906985 | 1.385550  |
| C  | -3.547766 | -3.628649 | 1.761520  |
| H  | -3.705077 | -3.812847 | 2.826643  |
| H  | 6.433055  | 0.314765  | 0.594952  |
| C  | 5.637699  | -0.238954 | 0.090908  |
| C  | -2.229542 | -2.636112 | -0.017990 |
| H  | -0.965062 | -2.015080 | -2.934662 |
| C  | -2.447348 | -2.886682 | 1.342256  |
| C  | 3.601931  | -1.625437 | -1.209840 |
| H  | 2.823531  | -2.196201 | -1.720246 |
| H  | 1.420324  | -1.066361 | -2.745198 |
| H  | -1.757469 | -2.465704 | 2.078984  |
| H  | -0.157946 | -0.726566 | -4.808203 |
| P  | -0.737819 | -1.681603 | -0.517598 |
| C  | 4.398542  | 0.363054  | -0.107371 |
| C  | -1.142532 | -1.171722 | -2.252598 |
| C  | 3.357930  | -0.320863 | -0.759524 |
| H  | 4.241262  | 1.384782  | 0.250751  |
| H  | -2.228710 | -0.997985 | -2.285088 |
| H  | -1.718290 | 0.081466  | -4.549955 |
| C  | 1.103974  | -0.027416 | -2.555240 |
| C  | -0.646174 | 0.121597  | -4.305982 |
| H  | 1.643932  | 0.588734  | -3.292085 |
| C  | -0.419012 | 0.078751  | -2.793657 |
| H  | -0.238098 | 1.044544  | -4.742796 |
| P  | 1.696149  | 0.468326  | -0.865103 |
| Ru | -0.068629 | 0.027737  | 0.767970  |
| H  | 3.715461  | 1.717056  | -2.655972 |
| H  | -5.609691 | -0.871617 | 1.509230  |
| H  | -3.250081 | -0.125646 | 1.513440  |
| C  | -5.190532 | -0.403315 | 0.615638  |
| C  | -3.864759 | 0.024574  | 0.621841  |
| C  | -1.018942 | 1.379774  | -2.189095 |
| C  | 3.207992  | 2.521443  | -2.114148 |
| H  | -1.851985 | 1.737792  | -2.812039 |
| C  | 2.204054  | 2.216209  | -1.180601 |
| H  | -7.007154 | -0.594991 | -0.538718 |
| C  | -5.970629 | -0.251165 | -0.528660 |
| H  | -0.264444 | 2.181867  | -2.226566 |
| P  | -1.545473 | 1.213602  | -0.432202 |
| C  | -3.295103 | 0.617329  | -0.512844 |
| H  | 4.364397  | 4.064797  | -3.071742 |
| C  | 3.580743  | 3.842662  | -2.344128 |
| C  | -5.420049 | 0.345483  | -1.661928 |
| C  | -4.096836 | 0.783857  | -1.652219 |
| C  | 1.586984  | 3.267578  | -0.500074 |
| H  | -6.024955 | 0.478108  | -2.561541 |
| H  | 0.771562  | 3.040820  | 0.187669  |
| H  | -3.702681 | 1.257463  | -2.554375 |
| C  | 2.961949  | 4.882247  | -1.644823 |
| C  | -1.825482 | 2.923015  | 0.173670  |

|   |           |           |           |
|---|-----------|-----------|-----------|
| C | 1.959048  | 4.594110  | -0.722936 |
| H | -2.390318 | 2.172779  | 2.124141  |
| H | -1.331917 | 3.990139  | -1.653378 |
| H | 3.263410  | 5.916512  | -1.823406 |
| C | -2.254769 | 3.065712  | 1.503629  |
| C | -1.660369 | 4.069018  | -0.613945 |
| H | 1.461200  | 5.395907  | -0.171666 |
| C | -2.509099 | 4.327980  | 2.033530  |
| C | -1.908840 | 5.332574  | -0.076647 |
| H | -2.845892 | 4.425960  | 3.067936  |
| H | -1.775009 | 6.219280  | -0.700443 |
| C | -2.331317 | 5.465388  | 1.244694  |
| H | -2.527023 | 6.455951  | 1.659992  |
| H | -1.281023 | -0.261067 | 1.829837  |
| C | 0.663716  | -1.339656 | 3.628791  |
| C | 2.969009  | -1.027897 | 3.959234  |
| C | 1.826871  | -1.938209 | 4.383485  |
| H | -0.149914 | -2.043395 | 3.402755  |
| H | 0.223362  | -0.470912 | 4.149133  |
| H | 3.964759  | -1.462245 | 4.113435  |
| H | 2.933273  | -0.084288 | 4.525929  |
| H | 2.008958  | -2.972663 | 4.050013  |
| H | 1.663233  | -1.966786 | 5.468008  |
| O | 1.231598  | -0.901668 | 2.379640  |
| C | 2.662902  | -0.780420 | 2.496797  |
| H | 2.958275  | 0.219285  | 2.144992  |
| H | 3.128985  | -1.525399 | 1.826747  |
| C | 0.663197  | 2.962468  | 2.576166  |
| O | 0.586683  | 1.816934  | 2.358094  |
| O | 0.762133  | 4.092173  | 2.805400  |

II

|    |           |           |           |
|----|-----------|-----------|-----------|
| H  | -3.588026 | -5.669312 | 0.719009  |
| H  | -2.863755 | -4.506355 | 2.798809  |
| C  | -2.811179 | -4.903283 | 0.677595  |
| C  | -2.408080 | -4.250159 | 1.839712  |
| H  | -2.500851 | -5.104320 | -1.451915 |
| C  | -2.203928 | -4.585524 | -0.537827 |
| C  | -1.416506 | -3.268888 | 1.789711  |
| H  | -1.124046 | -2.779646 | 2.721995  |
| H  | 4.508332  | -4.442718 | 1.430694  |
| H  | 4.933680  | -5.042530 | -0.948205 |
| H  | -6.884909 | -1.203596 | -0.912785 |
| H  | -5.538044 | -2.364366 | 0.833371  |
| C  | -1.210388 | -3.611815 | -0.586620 |
| C  | 3.857541  | -4.057272 | 0.642908  |
| C  | 4.094810  | -4.393342 | -0.688437 |
| C  | -0.812541 | -2.926933 | 0.573164  |
| H  | 2.610996  | -3.000983 | 2.032651  |
| C  | -5.902003 | -0.820230 | -0.632164 |
| C  | 2.784287  | -3.233088 | 0.979096  |
| C  | -5.148796 | -1.469166 | 0.342952  |
| H  | -0.713941 | -3.395319 | -1.538030 |
| C  | 3.254687  | -3.900392 | -1.686751 |
| H  | 3.432838  | -4.161250 | -2.732280 |
| H  | -5.975992 | 0.838097  | -2.016210 |
| C  | -5.392032 | 0.321991  | -1.251152 |
| C  | 1.949855  | -2.715806 | -0.020127 |
| H  | 0.576445  | -1.813327 | 2.817611  |
| C  | 2.194516  | -3.060960 | -1.355847 |
| C  | -3.892909 | -0.980291 | 0.706055  |
| H  | -3.327128 | -1.510061 | 1.474472  |
| H  | -1.741392 | -0.608988 | 2.387815  |
| H  | 1.564569  | -2.642465 | -2.146547 |
| H  | -0.219489 | -0.293378 | 4.531551  |
| P  | 0.505553  | -1.656682 | 0.378205  |
| C  | -4.139112 | 0.811731  | -0.893104 |
| C  | 0.853725  | -1.041461 | 2.084266  |
| C  | -3.375106 | 0.171185  | 0.099198  |
| H  | -3.754395 | 1.714307  | -1.379478 |
| H  | 1.948670  | -0.953639 | 2.162022  |
| H  | 1.430237  | 0.322573  | 4.306311  |
| C  | -1.287611 | 0.368933  | 2.164655  |
| C  | 0.382947  | 0.456045  | 3.997210  |
| H  | -1.779382 | 1.087495  | 2.839297  |
| C  | 0.227534  | 0.314239  | 2.481554  |
| H  | 0.056657  | 1.448492  | 4.339860  |
| P  | -1.697881 | 0.834807  | 0.422548  |
| Ru | 0.001303  | 0.087451  | -1.084465 |
| H  | -3.532097 | 2.374513  | 2.127528  |
| H  | 5.443160  | -1.250361 | -1.718265 |
| H  | 3.169386  | -0.278578 | -1.802055 |
| C  | 5.042457  | -0.739199 | -0.840076 |
| C  | 3.766633  | -0.182939 | -0.891078 |
| C  | 0.986216  | 1.493765  | 1.817074  |
| C  | -2.995716 | 3.089551  | 1.495369  |
| H  | 1.845730  | 1.780410  | 2.440569  |
| C  | -2.050068 | 2.634926  | 0.561604  |
| H  | -0.533150 | 1.454536  | -2.082632 |
| H  | 6.794126  | -1.099941 | 0.372124  |
| C  | 5.797368  | -0.655914 | 0.328227  |
| H  | 0.334022  | 2.382483  | 1.799734  |
| P  | 1.547877  | 1.227409  | 0.078843  |
| C  | 3.224461  | 0.470848  | 0.223570  |
| H  | -4.018811 | 4.787337  | 2.337468  |
| C  | -3.277732 | 4.447182  | 1.611088  |
| C  | 5.274412  | 0.000523  | 1.441056  |
| C  | 4.001941  | 0.566996  | 1.387830  |
| C  | -1.408405 | 3.568169  | -0.258333 |
| H  | 5.861496  | 0.079643  | 2.358496  |
| H  | -0.677297 | 3.234909  | -0.999530 |
| H  | 3.629681  | 1.084312  | 2.275139  |
| C  | -2.620652 | 5.371376  | 0.795427  |



|   |           |           |           |
|---|-----------|-----------|-----------|
| C | 1.950502  | 2.907810  | -0.528327 |
| C | -1.688573 | 4.930602  | -0.140303 |
| H | 2.149604  | 2.213538  | -2.570998 |
| H | 1.863681  | 3.920290  | 1.394590  |
| H | -2.843291 | 6.436433  | 0.888095  |
| C | 2.199460  | 3.075635  | -1.898230 |
| C | 2.040024  | 4.018347  | 0.321103  |
| H | -1.173763 | 5.645029  | -0.786713 |
| C | 2.513082  | 4.331480  | -2.410847 |
| C | 2.352881  | 5.275099  | -0.195978 |
| H | 2.704783  | 4.448617  | -3.479430 |
| H | 2.415199  | 6.133970  | 0.475688  |
| C | 2.584038  | 5.435798  | -1.560685 |
| H | 2.827139  | 6.421487  | -1.962697 |
| H | 1.151001  | -0.525846 | -2.082692 |
| O | -1.632690 | -1.043651 | -2.370634 |
| H | 0.127800  | 1.075443  | -2.517386 |
| C | -2.634020 | -1.621853 | -2.537058 |
| O | -3.608328 | -2.210112 | -2.741794 |

## Ila-VI

|    |           |           |           |
|----|-----------|-----------|-----------|
| H  | 0.555521  | -6.615425 | -1.793231 |
| H  | -1.772900 | -5.945722 | -2.365539 |
| C  | 0.209825  | -5.602103 | -1.578389 |
| C  | -1.095890 | -5.226536 | -1.899775 |
| H  | 2.091460  | -4.964742 | -0.722642 |
| C  | 1.067009  | -4.681014 | -0.979633 |
| C  | -1.544713 | -3.937908 | -1.621528 |
| H  | -2.575441 | -3.663737 | -1.865291 |
| H  | -6.203844 | -1.712012 | -1.373404 |
| H  | -6.653074 | -2.365234 | 0.988670  |
| H  | 6.540211  | -3.004186 | -0.431230 |
| H  | 4.808006  | -3.660359 | -2.095938 |
| C  | 0.618424  | -3.389478 | -0.703361 |
| C  | -5.381965 | -1.785293 | -0.657672 |
| C  | -5.633398 | -2.149987 | 0.662433  |
| C  | -0.687150 | -3.002852 | -1.021510 |
| H  | -3.921879 | -1.242243 | -2.124536 |
| C  | 5.627614  | -2.413541 | -0.534329 |
| C  | -4.080239 | -1.510665 | -1.078040 |
| C  | 4.656970  | -2.782348 | -1.463643 |
| H  | 1.284151  | -2.670372 | -0.223608 |
| C  | -4.572827 | -2.241795 | 1.563293  |
| H  | -4.756827 | -2.530976 | 2.600296  |
| H  | 6.197288  | -0.972348 | 0.972993  |
| C  | 5.435006  | -1.276825 | 0.252625  |
| C  | -3.007806 | -1.585221 | -0.178683 |
| H  | -1.468329 | -1.386211 | -3.097668 |
| C  | -3.275580 | -1.958368 | 1.146232  |
| C  | 3.491226  | -2.027740 | -1.602078 |
| H  | 2.748614  | -2.339932 | -2.339993 |
| H  | 1.045884  | -1.236378 | -2.714542 |
| H  | -2.458980 | -2.013437 | 1.868880  |
| H  | -0.256902 | -0.229170 | -4.875192 |
| P  | -1.257432 | -1.284960 | -0.673514 |
| C  | 4.274477  | -0.522122 | 0.115358  |
| C  | -1.420357 | -0.554815 | -2.375928 |
| C  | 3.282985  | -0.892540 | -0.807880 |
| H  | 4.134544  | 0.370800  | 0.733589  |
| H  | -2.391113 | -0.040177 | -2.430202 |
| H  | -1.496483 | 1.000884  | -4.557871 |
| C  | 1.084649  | -0.146150 | -2.555019 |
| C  | -0.474777 | 0.683427  | -4.301849 |
| H  | 1.793225  | 0.237581  | -3.304625 |
| C  | -0.326273 | 0.443358  | -2.798435 |
| H  | 0.215090  | 1.467320  | -4.647386 |
| P  | 1.769046  | 0.146638  | -0.872213 |
| Ru | 0.034520  | -0.056216 | 0.730317  |
| H  | 3.378217  | 1.453557  | -2.995981 |
| H  | -5.322711 | 1.269123  | 2.006745  |
| H  | -2.866997 | 1.186619  | 1.834788  |
| C  | -4.842541 | 1.496872  | 1.052495  |
| C  | -3.455037 | 1.455778  | 0.953986  |
| C  | -0.521396 | 1.803773  | -2.084039 |
| C  | 3.288621  | 2.153821  | -2.160799 |
| H  | -1.277567 | 2.397183  | -2.617181 |
| C  | 2.571850  | 1.803259  | -1.004584 |
| H  | -0.389231 | 0.257139  | 3.631474  |
| H  | -6.704616 | 1.843658  | 0.011557  |
| C  | -5.615356 | 1.817754  | -0.062704 |
| H  | 0.405586  | 2.392428  | -2.157888 |
| P  | -0.959664 | 1.712386  | -0.293104 |
| C  | -2.808575 | 1.736022  | -0.258537 |
| H  | 4.469157  | 3.650566  | -3.160906 |
| C  | 3.918881  | 3.391054  | -2.253917 |
| C  | -4.987985 | 2.107511  | -1.271644 |
| C  | -3.596846 | 2.073195  | -1.367920 |
| C  | 2.534797  | 2.703974  | 0.065454  |
| H  | -5.581647 | 2.368702  | -2.150408 |
| H  | 2.005026  | 2.441739  | 0.981635  |
| H  | -3.144030 | 2.314687  | -2.331860 |
| C  | 3.861496  | 4.289987  | -1.186604 |

|   |           |           |           |
|---|-----------|-----------|-----------|
| C | -0.587485 | 3.382664  | 0.355970  |
| C | 3.179762  | 3.938845  | -0.025305 |
| H | -0.813031 | 2.717859  | 2.402340  |
| H | -0.313694 | 4.369947  | -1.562191 |
| H | 4.360163  | 5.258766  | -1.260719 |
| C | -0.605050 | 3.567083  | 1.745501  |
| C | -0.327951 | 4.479549  | -0.475176 |
| H | 3.138227  | 4.629108  | 0.820353  |
| C | -0.353368 | 4.821301  | 2.294763  |
| C | -0.076255 | 5.734206  | 0.077545  |
| H | -0.367844 | 4.952401  | 3.378746  |
| H | 0.128062  | 6.582016  | -0.579878 |
| C | -0.084308 | 5.907107  | 1.460586  |
| H | 0.114251  | 6.891129  | 1.890383  |
| H | -1.277138 | -0.167564 | 1.843325  |
| C | 0.051451  | -2.786834 | 2.591966  |
| C | 2.233672  | -2.948678 | 3.501072  |
| C | 0.995431  | -3.788209 | 3.226329  |
| H | -0.592034 | -3.224835 | 1.812020  |
| H | -0.592478 | -2.281688 | 3.334136  |
| H | 3.146751  | -3.542175 | 3.633939  |
| H | 2.102106  | -2.331106 | 4.402868  |
| H | 1.229393  | -4.595143 | 2.514449  |
| H | 0.569211  | -4.256712 | 4.122086  |
| O | 0.897392  | -1.783899 | 1.988087  |
| C | 2.282413  | -2.074231 | 2.272648  |
| H | 2.810298  | -1.119252 | 2.401514  |
| H | 2.730002  | -2.601493 | 1.408374  |
| H | -0.823075 | 0.036181  | 2.849387  |
| O | 1.200988  | 0.952981  | 2.352916  |
| C | 1.044480  | 0.655253  | 3.527073  |
| O | 1.543598  | 0.521233  | 4.589719  |

## II-III

|    |           |           |           |
|----|-----------|-----------|-----------|
| H  | -3.173858 | 5.976014  | 1.054657  |
| H  | -4.215909 | 4.255956  | 2.522673  |
| C  | -2.909031 | 4.923454  | 0.934341  |
| C  | -3.491176 | 3.959671  | 1.761526  |
| H  | -1.555161 | 5.283361  | -0.711948 |
| C  | -2.003793 | 4.538455  | -0.050912 |
| C  | -3.155805 | 2.617764  | 1.613179  |
| H  | -3.636875 | 1.871074  | 2.252900  |
| H  | -5.527467 | -2.821148 | 1.056543  |
| H  | -6.847578 | -1.860124 | -0.824059 |
| H  | 2.189023  | 6.717537  | -1.257883 |
| H  | 1.705596  | 4.969399  | -2.965589 |
| C  | -1.666703 | 3.192693  | -0.203636 |
| C  | -5.145383 | -1.963262 | 0.498738  |
| C  | -5.882498 | -1.426622 | -0.554006 |
| C  | -2.225425 | 2.224863  | 0.636781  |
| H  | -3.344628 | -1.879661 | 1.656672  |
| C  | 2.035694  | 5.680683  | -0.951527 |
| C  | -3.909225 | -1.417220 | 0.843734  |
| C  | 1.766526  | 4.702249  | -1.908638 |
| H  | -0.974811 | 2.895666  | -0.991758 |
| C  | -5.386934 | -0.329313 | -1.260043 |
| H  | -5.959315 | 0.100084  | -2.084377 |
| H  | 2.324606  | 6.097480  | 1.148195  |
| C  | 2.110623  | 5.334036  | 0.397362  |
| C  | -3.405172 | -0.315400 | 0.142206  |
| H  | -1.928262 | 0.593164  | 2.873925  |
| C  | -4.160896 | 0.226170  | -0.910203 |
| C  | 1.566072  | 3.380553  | -1.516492 |
| H  | 1.327441  | 2.620583  | -2.267547 |
| H  | 0.102193  | 2.148433  | 2.109193  |
| H  | -3.794082 | 1.102464  | -1.454565 |
| H  | -0.155787 | 0.931191  | 4.506745  |
| P  | -1.780927 | 0.454922  | 0.468844  |
| C  | 1.917846  | 4.011790  | 0.793026  |
| C  | -1.348250 | -0.045773 | 2.189646  |
| C  | 1.637787  | 3.026248  | -0.162250 |
| H  | 1.989866  | 3.757467  | 1.853827  |
| H  | -1.707609 | -1.073225 | 2.356342  |
| H  | -0.293211 | -0.838273 | 4.517009  |
| C  | 0.817327  | 1.311357  | 2.038587  |
| C  | 0.256512  | 0.006580  | 4.077888  |
| H  | 1.649440  | 1.590607  | 2.701766  |
| C  | 0.148739  | 0.009412  | 2.551719  |
| H  | 1.304294  | -0.073817 | 4.403196  |
| P  | 1.401570  | 1.273038  | 0.294411  |
| Ru | -0.057169 | -0.007321 | -1.055372 |
| H  | 3.395240  | 0.719261  | 2.533156  |
| H  | -3.376140 | -4.444626 | -1.217991 |
| H  | -1.836934 | -2.518101 | -1.319577 |
| C  | -2.582608 | -4.352211 | -0.473320 |
| C  | -1.708631 | -3.266950 | -0.532896 |
| C  | 0.867427  | -1.254817 | 2.032964  |
| C  | 3.860719  | 0.515331  | 1.565662  |
| H  | 0.609768  | -2.103243 | 2.684512  |
| C  | 3.144791  | 0.674285  | 0.371680  |
| H  | 0.920262  | -0.706729 | -2.359403 |
| H  | -3.139319 | -6.147716 | 0.588528  |
| C  | -2.452143 | -5.300523 | 0.537166  |
| H  | 1.951363  | -1.111614 | 2.139898  |
| P  | 0.529359  | -1.746514 | 0.280877  |
| C  | -0.687511 | -3.120972 | 0.412280  |
| H  | 5.728175  | -0.032128 | 2.490444  |
| C  | 5.189163  | 0.088174  | 1.548169  |
| C  | -1.430619 | -5.171760 | 1.480520  |
| C  | -0.548176 | -4.097615 | 1.413172  |
| C  | 3.804526  | 0.416906  | -0.838811 |
| H  | -1.311013 | -5.921020 | 2.265831  |
| H  | 3.284040  | 0.558415  | -1.791190 |
| H  | 0.269474  | -4.042306 | 2.137727  |
| C  | 5.826750  | -0.174347 | 0.338243  |

|   |           |           |           |
|---|-----------|-----------|-----------|
| C | 2.040672  | -2.631613 | -0.261952 |
| C | 5.131107  | -0.001977 | -0.858349 |
| H | 1.150709  | -3.017117 | -2.201929 |
| H | 3.210499  | -2.470321 | 1.567094  |
| H | 6.866710  | -0.507134 | 0.326075  |
| C | 2.037580  | -3.140267 | -1.570703 |
| C | 3.170993  | -2.834267 | 0.538542  |
| H | 5.623002  | -0.196301 | -1.813676 |
| C | 3.145545  | -3.814173 | -2.073846 |
| C | 4.281492  | -3.509397 | 0.030911  |
| H | 3.125194  | -4.205673 | -3.092935 |
| H | 5.158206  | -3.652896 | 0.666532  |
| C | 4.275342  | -3.994426 | -1.274254 |
| H | 5.146774  | -4.521525 | -1.667969 |
| H | -1.179109 | -0.832322 | -2.044844 |
| O | -0.913451 | 1.317285  | -2.707257 |
| H | 1.400052  | -0.054148 | -2.073780 |
| C | -1.573894 | 0.342178  | -3.021607 |
| O | -2.382251 | -0.151815 | -3.723441 |

III

|    |           |           |           |
|----|-----------|-----------|-----------|
| H  | -4.259082 | 5.227308  | 1.113187  |
| H  | -4.749329 | 3.410612  | 2.744277  |
| C  | -3.795556 | 4.245942  | 0.992519  |
| C  | -4.067292 | 3.229408  | 1.911010  |
| H  | -2.746429 | 4.783499  | -0.818372 |
| C  | -2.948407 | 4.000058  | -0.084660 |
| C  | -3.478228 | 1.977884  | 1.761935  |
| H  | -3.725623 | 1.186126  | 2.475273  |
| H  | -4.916173 | -3.835209 | 0.996222  |
| H  | -6.305340 | -3.154331 | -0.954393 |
| H  | 0.567263  | 6.965946  | -1.323032 |
| H  | 0.439002  | 5.135152  | -3.007664 |
| C  | -2.353919 | 2.746777  | -0.237965 |
| C  | -4.675593 | -2.925577 | 0.441458  |
| C  | -5.452426 | -2.544065 | -0.650475 |
| C  | -2.598932 | 1.732448  | 0.694222  |
| H  | -2.972962 | -2.494802 | 1.672962  |
| C  | 0.658854  | 5.924537  | -1.007555 |
| C  | -3.578999 | -2.156154 | 0.829217  |
| C  | 0.589246  | 4.900385  | -1.951979 |
| H  | -1.713820 | 2.551296  | -1.098713 |
| C  | -5.141462 | -1.378830 | -1.352664 |
| H  | -5.744390 | -1.072519 | -2.209332 |
| H  | 0.904120  | 6.419276  | 1.081115  |
| C  | 0.846464  | 5.619058  | 0.340433  |
| C  | -3.262131 | -0.984704 | 0.130143  |
| H  | -1.998728 | 0.091341  | 2.911219  |
| C  | -4.058617 | -0.599602 | -0.960535 |
| C  | 0.701110  | 3.571325  | -1.549429 |
| H  | 0.610425  | 2.770089  | -2.289578 |
| H  | -0.345731 | 2.099989  | 2.123461  |
| H  | -3.836102 | 0.323300  | -1.505422 |
| H  | -0.352568 | 0.875461  | 4.512637  |
| P  | -1.829755 | 0.081497  | 0.502102  |
| C  | 0.966722  | 4.292001  | 0.747431  |
| C  | -1.292289 | -0.368125 | 2.203264  |
| C  | 0.888619  | 3.259014  | -0.196086 |
| H  | 1.124852  | 4.071816  | 1.806562  |
| H  | -1.406090 | -1.456468 | 2.327906  |
| H  | -0.095238 | -0.880450 | 4.544044  |
| C  | 0.525326  | 1.428925  | 2.038994  |
| C  | 0.255852  | 0.060030  | 4.095811  |
| H  | 1.295969  | 1.879715  | 2.681284  |
| C  | 0.156014  | 0.020252  | 2.570013  |
| H  | 1.294047  | 0.216876  | 4.423842  |
| P  | 1.075619  | 1.508787  | 0.284807  |
| Ru | -0.053118 | -0.025352 | -1.032161 |
| H  | 3.173257  | 1.387370  | 2.489166  |
| H  | -2.407670 | -4.986165 | -1.172032 |
| H  | -1.280217 | -2.796473 | -1.267713 |
| C  | -1.629290 | -4.752441 | -0.442589 |
| C  | -0.986216 | -3.515672 | -0.497570 |
| C  | 1.138761  | -1.056852 | 2.065038  |
| C  | 3.657728  | 1.302521  | 1.513476  |
| H  | 1.064996  | -1.943531 | 2.712822  |
| C  | 2.908124  | 1.315227  | 0.329254  |
| H  | 1.143011  | -0.511299 | -2.273544 |
| H  | -1.793733 | -6.640127 | 0.590843  |
| C  | -1.287926 | -5.673486 | 0.543645  |
| H  | 2.164750  | -0.681574 | 2.181651  |
| P  | 0.921165  | -1.596113 | 0.309688  |
| C  | 0.010382  | -3.188893 | 0.428449  |
| H  | 5.611764  | 1.170885  | 2.410664  |
| C  | 5.047034  | 1.179652  | 1.475851  |
| C  | -0.287328 | -5.363042 | 1.467227  |
| C  | 0.364406  | -4.135268 | 1.404829  |
| C  | 3.592491  | 1.228520  | -0.892260 |
| H  | -0.003285 | -6.088001 | 2.232799  |
| H  | 3.043565  | 1.271991  | -1.837722 |
| H  | 1.172250  | -3.929635 | 2.113366  |
| C  | 5.710261  | 1.077042  | 0.255787  |

|   |           |           |           |
|---|-----------|-----------|-----------|
| C | 2.583724  | -2.145081 | -0.232530 |
| C | 4.977979  | 1.108542  | -0.930937 |
| H | 1.793821  | -2.715528 | -2.171350 |
| H | 3.693106  | -1.737211 | 1.595268  |
| H | 6.797578  | 0.980719  | 0.227799  |
| C | 2.687309  | -2.644319 | -1.540852 |
| C | 3.731834  | -2.101473 | 0.566772  |
| H | 5.488013  | 1.041699  | -1.894067 |
| C | 3.912724  | -3.067716 | -2.045018 |
| C | 4.960223  | -2.524668 | 0.057946  |
| H | 3.974929  | -3.456209 | -3.063509 |
| H | 5.848289  | -2.477597 | 0.692237  |
| C | 5.055841  | -3.001697 | -1.246649 |
| H | 6.019017  | -3.331612 | -1.641108 |
| H | -1.059230 | -1.023013 | -2.197224 |
| O | -1.196057 | 1.003908  | -2.647400 |
| H | 1.321313  | 0.305664  | -2.124511 |
| C | -1.570408 | -0.150264 | -2.961110 |
| O | -2.275677 | -0.679050 | -3.771146 |

## IV

|    |           |           |           |
|----|-----------|-----------|-----------|
| H  | -4.417833 | 5.117286  | 1.101067  |
| H  | -4.959900 | 3.227907  | 2.630317  |
| C  | -3.930688 | 4.149219  | 0.966415  |
| C  | -4.231627 | 3.091873  | 1.828103  |
| H  | -2.794995 | 4.776837  | -0.761720 |
| C  | -3.022779 | 3.960899  | -0.072137 |
| C  | -3.610800 | 1.857913  | 1.662293  |
| H  | -3.877760 | 1.033757  | 2.330755  |
| H  | -4.823107 | -3.980904 | 0.786390  |
| H  | -6.282198 | -3.234088 | -1.087602 |
| H  | 0.514435  | 6.975256  | -1.331585 |
| H  | 0.451589  | 5.149968  | -3.025716 |
| C  | -2.398586 | 2.724250  | -0.243302 |
| C  | -4.618987 | -3.038597 | 0.273080  |
| C  | -5.433923 | -2.621001 | -0.776426 |
| C  | -2.672489 | 1.669799  | 0.633821  |
| H  | -2.900260 | -2.622859 | 1.488123  |
| C  | 0.603491  | 5.933251  | -1.017272 |
| C  | -3.533324 | -2.260316 | 0.674693  |
| C  | 0.570402  | 4.911891  | -1.966718 |
| H  | -1.713060 | 2.572576  | -1.076768 |
| C  | -5.167981 | -1.414054 | -1.425454 |
| H  | -5.807292 | -1.078418 | -2.244410 |
| H  | 0.781144  | 6.420487  | 1.079966  |
| C  | 0.751918  | 5.623197  | 0.334402  |
| C  | -3.262773 | -1.047088 | 0.031445  |
| H  | -2.080445 | 0.041245  | 2.842043  |
| C  | -4.092007 | -0.630749 | -1.023006 |
| C  | 0.680260  | 3.582131  | -1.565884 |
| H  | 0.618289  | 2.783186  | -2.311072 |
| H  | -0.450651 | 2.096097  | 2.080980  |
| H  | -3.899553 | 0.325170  | -1.521264 |
| H  | -0.496226 | 0.877457  | 4.475675  |
| P  | -1.856834 | 0.039973  | 0.437396  |
| C  | 0.868274  | 4.295074  | 0.739417  |
| C  | -1.346482 | -0.400706 | 2.151070  |
| C  | 0.826775  | 3.264564  | -0.209000 |
| H  | 0.993992  | 4.072117  | 1.802246  |
| H  | -1.435105 | -1.491658 | 2.275051  |
| H  | -0.192894 | -0.870876 | 4.521829  |
| C  | 0.434208  | 1.440818  | 2.019278  |
| C  | 0.143984  | 0.076911  | 4.077944  |
| H  | 1.182936  | 1.908019  | 2.675542  |
| C  | 0.082957  | 0.028353  | 2.550532  |
| H  | 1.169241  | 0.262975  | 4.430551  |
| P  | 1.016504  | 1.512297  | 0.273270  |
| Ru | -0.053981 | -0.016471 | -1.052177 |
| H  | 3.082015  | 1.502480  | 2.517505  |
| H  | -2.224668 | -5.035115 | -1.292482 |
| H  | -1.136301 | -2.819342 | -1.352200 |
| C  | -1.493209 | -4.776374 | -0.523692 |
| C  | -0.875632 | -3.524812 | -0.559985 |
| C  | 1.108421  | -1.020403 | 2.073127  |
| C  | 3.584369  | 1.400183  | 1.552472  |
| H  | 1.045423  | -1.908487 | 2.719669  |
| C  | 2.853635  | 1.358933  | 0.357156  |
| H  | 1.254710  | -0.509126 | -2.176898 |
| H  | -1.677506 | -6.658337 | 0.518014  |
| C  | -1.189815 | -5.681527 | 0.489184  |
| H  | 2.120232  | -0.615172 | 2.213075  |
| P  | 0.939115  | -1.566311 | 0.316028  |
| C  | 0.060960  | -3.175230 | 0.420223  |
| H  | 5.526436  | 1.343852  | 2.483349  |
| C  | 4.976694  | 1.310568  | 1.540159  |
| C  | -0.248682 | -5.343251 | 1.464428  |
| C  | 0.381291  | -4.103320 | 1.425480  |
| C  | 3.559382  | 1.248173  | -0.850049 |
| H  | 0.006332  | -6.055596 | 2.251887  |
| H  | 3.022983  | 1.241080  | -1.802884 |
| H  | 1.144662  | -3.875919 | 2.175274  |
| C  | 5.661978  | 1.188373  | 0.333962  |



|   |           |           |           |
|---|-----------|-----------|-----------|
| C | 2.620154  | -2.084413 | -0.195873 |
| C | 4.948064  | 1.163501  | -0.863882 |
| H | 1.867880  | -2.673665 | -2.144534 |
| H | 3.690625  | -1.651920 | 1.648515  |
| H | 6.751734  | 1.119363  | 0.325762  |
| C | 2.751250  | -2.585872 | -1.501005 |
| C | 3.753084  | -2.020821 | 0.622707  |
| H | 5.474998  | 1.077356  | -1.816421 |
| C | 3.991509  | -2.991358 | -1.983555 |
| C | 4.995806  | -2.427250 | 0.135411  |
| H | 4.076706  | -3.382038 | -2.999585 |
| H | 5.872794  | -2.364507 | 0.783633  |
| C | 5.119929  | -2.906189 | -1.166233 |
| H | 6.094395  | -3.222842 | -1.543558 |
| H | -2.195358 | -0.045324 | -4.059547 |
| O | -1.215341 | 1.071480  | -2.648120 |
| H | 1.238894  | 0.331184  | -2.248042 |
| C | -1.569989 | -0.032572 | -3.143025 |
| O | -1.221920 | -1.119974 | -2.612806 |

## IV-V

|    |           |           |           |
|----|-----------|-----------|-----------|
| H  | 6.678410  | 0.300605  | 0.603954  |
| H  | 5.548643  | 1.205966  | 2.629874  |
| C  | 5.608004  | 0.516120  | 0.582769  |
| C  | 4.975464  | 1.019638  | 1.719220  |
| H  | 5.357961  | -0.102021 | -1.472464 |
| C  | 4.870714  | 0.292709  | -0.578238 |
| C  | 3.610364  | 1.298189  | 1.696826  |
| H  | 3.147328  | 1.708596  | 2.597494  |
| H  | 0.108039  | 6.317221  | 0.889315  |
| H  | 0.935832  | 6.833035  | -1.400552 |
| H  | 5.673372  | -3.911217 | -1.184362 |
| H  | 3.945307  | -3.274958 | -2.863498 |
| C  | 3.502887  | 0.557366  | -0.602743 |
| C  | 0.494039  | 5.518287  | 0.252750  |
| C  | 0.958144  | 5.806500  | -1.029006 |
| C  | 2.857269  | 1.060312  | 0.536768  |
| H  | 0.133544  | 4.008907  | 1.733713  |
| C  | 4.726395  | -3.475994 | -0.857982 |
| C  | 0.514091  | 4.208301  | 0.729599  |
| C  | 3.758796  | -3.121281 | -1.798614 |
| H  | 2.929253  | 0.354221  | -1.510797 |
| C  | 1.459382  | 4.782773  | -1.835093 |
| H  | 1.832553  | 5.005529  | -2.836600 |
| H  | 5.233377  | -3.560903 | 1.239832  |
| C  | 4.481105  | -3.279003 | 0.500013  |
| C  | 1.010514  | 3.175618  | -0.075795 |
| H  | 1.205056  | 1.799954  | 2.825391  |
| C  | 1.488852  | 3.476026  | -1.360577 |
| C  | 2.554578  | -2.560530 | -1.382939 |
| H  | 1.814344  | -2.254379 | -2.128060 |
| H  | 1.936233  | -0.808156 | 2.346786  |
| H  | 1.895760  | 2.678033  | -1.989711 |
| H  | 1.008955  | 0.130156  | 4.584047  |
| P  | 1.061501  | 1.425275  | 0.431390  |
| C  | 3.273351  | -2.725220 | 0.922166  |
| C  | 0.432192  | 1.387782  | 2.159565  |
| C  | 2.304187  | -2.354324 | -0.018430 |
| H  | 3.100974  | -2.587744 | 1.992420  |
| H  | -0.409806 | 2.096507  | 2.212416  |
| H  | -0.593590 | 0.895211  | 4.595822  |
| C  | 0.890315  | -1.124906 | 2.209138  |
| C  | -0.019738 | 0.042769  | 4.204930  |
| H  | 0.760936  | -2.007979 | 2.853399  |
| C  | -0.046299 | 0.009160  | 2.677316  |
| H  | -0.454446 | -0.873314 | 4.630455  |
| P  | 0.701338  | -1.609896 | 0.442468  |
| Ru | -0.053125 | 0.044812  | -0.918531 |
| H  | -0.408881 | -3.583677 | 2.512905  |
| H  | -2.699991 | 4.827975  | -1.080587 |
| H  | -1.572598 | 2.627796  | -1.152953 |
| C  | -2.959151 | 4.066608  | -0.341460 |
| C  | -2.318052 | 2.827641  | -0.379490 |
| C  | -1.500353 | -0.260329 | 2.226808  |
| C  | -0.810781 | -3.805807 | 1.520842  |
| H  | -2.198688 | 0.287865  | 2.877467  |
| C  | -0.451496 | -3.036625 | 0.407867  |
| H  | -1.503240 | -1.457746 | -3.479199 |
| H  | -4.418163 | 5.301473  | 0.661637  |
| C  | -3.919083 | 4.330519  | 0.631984  |
| H  | -1.725522 | -1.329787 | 2.361192  |
| P  | -1.827260 | 0.200944  | 0.473041  |
| C  | -2.636850 | 1.842743  | 0.564020  |
| H  | -1.959011 | -5.476116 | 2.253746  |
| C  | -1.688179 | -4.881791 | 1.378373  |
| C  | -4.254505 | 3.346632  | 1.564913  |
| C  | -3.622956 | 2.107154  | 1.528646  |
| C  | -0.982054 | -3.372083 | -0.847154 |
| H  | -5.019425 | 3.543389  | 2.319025  |
| H  | -0.712722 | -2.777056 | -1.726074 |
| H  | -3.919929 | 1.338361  | 2.248535  |
| C  | -2.208042 | -5.205094 | 0.126350  |

|   |           |           |           |
|---|-----------|-----------|-----------|
| C | -3.147267 | -0.898840 | -0.134871 |
| C | -1.852538 | -4.447380 | -0.989893 |
| H | -3.025483 | 0.044381  | -2.085372 |
| H | -3.525358 | -2.030081 | 1.683765  |
| H | -2.891833 | -6.050006 | 0.020036  |
| C | -3.500111 | -0.742065 | -1.486183 |
| C | -3.775951 | -1.888177 | 0.629644  |
| H | -2.258249 | -4.690344 | -1.974461 |
| C | -4.457062 | -1.572707 | -2.063053 |
| C | -4.736379 | -2.713853 | 0.047088  |
| H | -4.727103 | -1.442433 | -3.113290 |
| H | -5.222259 | -3.483639 | 0.650900  |
| C | -5.074352 | -2.562374 | -1.296945 |
| H | -5.827013 | -3.212674 | -1.747689 |
| H | 0.492495  | 1.172274  | -4.379699 |
| O | 1.185414  | 0.062482  | -2.800292 |
| H | -0.813639 | -1.658094 | -3.724999 |
| C | 0.356289  | 0.857592  | -3.323763 |
| O | -0.628165 | 1.295763  | -2.668972 |

# V

|    |           |           |           |
|----|-----------|-----------|-----------|
| H  | 1.766550  | -6.458680 | -1.792675 |
| H  | -0.491697 | -6.002969 | -2.739894 |
| C  | 1.268172  | -5.509390 | -1.585405 |
| C  | 0.002341  | -5.253861 | -2.117625 |
| H  | 2.879936  | -4.741684 | -0.367335 |
| C  | 1.888496  | -4.551742 | -0.787326 |
| C  | -0.638141 | -4.047816 | -1.850025 |
| H  | -1.637902 | -3.871735 | -2.258982 |
| H  | -5.631519 | -2.932448 | -1.376732 |
| H  | -5.991567 | -3.424043 | 1.037527  |
| H  | 6.915789  | -1.974492 | -0.100429 |
| H  | 5.312855  | -2.981825 | -1.720670 |
| C  | 1.247390  | -3.340606 | -0.520820 |
| C  | -4.824291 | -2.773626 | -0.658251 |
| C  | -5.025697 | -3.047951 | 0.693399  |
| C  | -0.018633 | -3.073966 | -1.050173 |
| H  | -3.463292 | -2.092827 | -2.168849 |
| C  | 5.926842  | -1.533001 | -0.240039 |
| C  | -3.592720 | -2.294408 | -1.102528 |
| C  | 5.029455  | -2.098049 | -1.144382 |
| H  | 1.731698  | -2.592707 | 0.108695  |
| C  | -3.990500 | -2.836471 | 1.603144  |
| H  | -4.143069 | -3.039129 | 2.665480  |
| H  | 6.263855  | 0.068538  | 1.171582  |
| C  | 5.561265  | -0.390759 | 0.472989  |
| C  | -2.546163 | -2.079318 | -0.194700 |
| H  | -1.073698 | -1.634384 | -3.122082 |
| C  | -2.761777 | -2.351359 | 1.163156  |
| C  | 3.767870  | -1.532994 | -1.329753 |
| H  | 3.088468  | -1.996888 | -2.047492 |
| H  | 1.398452  | -1.051893 | -2.674295 |
| H  | -1.973500 | -2.144077 | 1.888912  |
| H  | 0.018416  | -0.343134 | -4.873685 |
| P  | -0.884848 | -1.484549 | -0.699789 |
| C  | 4.303424  | 0.175191  | 0.288764  |
| C  | -1.171785 | -0.804667 | -2.403784 |
| C  | 3.384475  | -0.394363 | -0.608043 |
| H  | 4.034006  | 1.075797  | 0.848177  |
| H  | -2.216538 | -0.462617 | -2.463004 |
| H  | -1.421773 | 0.666973  | -4.636241 |
| C  | 1.226416  | 0.022433  | -2.498908 |
| C  | -0.372270 | 0.532531  | -4.335569 |
| H  | 1.900140  | 0.546474  | -3.193474 |
| C  | -0.247900 | 0.354575  | -2.822248 |
| H  | 0.188892  | 1.413618  | -4.679778 |
| P  | 1.732525  | 0.398595  | -0.769825 |
| Ru | 0.081575  | -0.012809 | 0.753449  |
| H  | 3.091322  | 2.104773  | -2.820673 |
| H  | -5.396852 | 0.223824  | 1.781561  |
| H  | -2.955073 | 0.562075  | 1.668782  |
| C  | -4.947164 | 0.587288  | 0.854790  |
| C  | -3.570046 | 0.788966  | 0.794982  |
| C  | -0.679320 | 1.678216  | -2.151217 |
| C  | 2.914230  | 2.708315  | -1.926414 |
| H  | -1.507726 | 2.135702  | -2.710185 |
| C  | 2.263827  | 2.164497  | -0.806990 |
| H  | -6.821912 | 0.664137  | -0.217242 |
| C  | -5.743338 | 0.830037  | -0.262661 |
| H  | 0.147839  | 2.399215  | -2.223624 |
| P  | -1.148700 | 1.557048  | -0.372688 |
| C  | -2.966863 | 1.249058  | -0.385123 |
| H  | 3.865224  | 4.436316  | -2.789691 |
| C  | 3.366318  | 4.025108  | -1.909438 |
| C  | -5.155040 | 1.286835  | -1.440434 |
| C  | -3.779148 | 1.502533  | -1.500378 |
| C  | 2.105573  | 2.957468  | 0.336622  |
| H  | -5.769856 | 1.486541  | -2.320736 |
| H  | 1.608668  | 2.552735  | 1.220475  |
| H  | -3.357768 | 1.873714  | -2.437009 |
| C  | 3.198887  | 4.810325  | -0.766925 |
| C  | -1.087263 | 3.282424  | 0.235797  |

|   |           |           |           |
|---|-----------|-----------|-----------|
| C | 2.578099  | 4.270710  | 0.355849  |
| H | -1.729606 | 2.659508  | 2.207091  |
| H | -0.472742 | 4.244798  | -1.616783 |
| H | 3.561143  | 5.840632  | -0.754466 |
| C | -1.427896 | 3.502320  | 1.578575  |
| C | -0.744336 | 4.376889  | -0.567140 |
| H | 2.443833  | 4.875425  | 1.255710  |
| C | -1.406357 | 4.786894  | 2.112437  |
| C | -0.729843 | 5.663781  | -0.031015 |
| H | -1.672805 | 4.943796  | 3.159672  |
| H | -0.459370 | 6.508929  | -0.667868 |
| C | -1.052963 | 5.871337  | 1.308187  |
| H | -1.037702 | 6.880298  | 1.725571  |
| C | 0.501816  | -2.651175 | 2.697827  |
| C | 2.481988  | -2.151410 | 3.880099  |
| C | 1.573120  | -3.320150 | 3.531026  |
| H | 0.068375  | -3.298331 | 1.918625  |
| H | -0.318261 | -2.248371 | 3.314981  |
| H | 3.483894  | -2.452018 | 4.211319  |
| H | 2.037112  | -1.536811 | 4.678939  |
| H | 2.120401  | -4.065485 | 2.932039  |
| H | 1.161031  | -3.840867 | 4.404388  |
| O | 1.166331  | -1.540561 | 2.053724  |
| C | 2.501572  | -1.388040 | 2.578616  |
| H | 2.705981  | -0.312287 | 2.668982  |
| H | 3.218557  | -1.828579 | 1.861243  |
| C | -0.272208 | 0.739940  | 3.201660  |
| O | -1.141403 | -0.001772 | 2.669681  |
| O | 0.697890  | 1.192978  | 2.539703  |
| H | -0.364180 | 1.001203  | 4.278433  |

## VI

|    |           |           |           |
|----|-----------|-----------|-----------|
| H  | 1.543870  | -6.395800 | -2.040161 |
| H  | -0.730671 | -5.875857 | -2.911011 |
| C  | 1.068012  | -5.444732 | -1.792036 |
| C  | -0.207211 | -5.153337 | -2.281404 |
| H  | 2.723273  | -4.744388 | -0.592293 |
| C  | 1.726356  | -4.522583 | -0.982231 |
| C  | -0.820117 | -3.945595 | -1.960902 |
| H  | -1.827647 | -3.736976 | -2.334603 |
| H  | -5.834070 | -2.261993 | -1.653595 |
| H  | -6.235344 | -3.250929 | 0.598134  |
| H  | 6.875490  | -2.269776 | -0.023462 |
| H  | 5.288104  | -3.118123 | -1.745368 |
| C  | 1.114300  | -3.309372 | -0.662162 |
| C  | -5.017225 | -2.336567 | -0.932189 |
| C  | -5.241192 | -2.889722 | 0.326416  |
| C  | -0.160802 | -3.007808 | -1.149947 |
| H  | -3.611675 | -1.453067 | -2.280130 |
| C  | 5.909270  | -1.781651 | -0.166425 |
| C  | -3.749670 | -1.873123 | -1.281974 |
| C  | 5.020297  | -2.257576 | -1.127968 |
| H  | 1.624745  | -2.594060 | -0.013114 |
| C  | -4.187305 | -2.985073 | 1.234606  |
| H  | -4.352095 | -3.421031 | 2.222224  |
| H  | 6.262056  | -0.279637 | 1.347751  |
| C  | 5.565441  | -0.668575 | 0.602052  |
| C  | -2.686721 | -1.952946 | -0.371253 |
| H  | -1.064426 | -1.428794 | -3.178153 |
| C  | -2.921446 | -2.520586 | 0.889776  |
| C  | 3.787791  | -1.631935 | -1.318926 |
| H  | 3.114431  | -2.023658 | -2.084118 |
| H  | 1.402324  | -1.031109 | -2.644661 |
| H  | -2.110212 | -2.579999 | 1.615163  |
| H  | 0.126497  | -0.133664 | -4.853551 |
| P  | -0.977974 | -1.406638 | -0.753905 |
| C  | 4.336409  | -0.044298 | 0.413491  |
| C  | -1.135882 | -0.622110 | -2.431038 |
| C  | 3.426826  | -0.522797 | -0.543773 |
| H  | 4.082894  | 0.834095  | 1.015710  |
| H  | -2.151308 | -0.211365 | -2.517913 |
| H  | -1.254026 | 0.952060  | -4.597771 |
| C  | 1.310519  | 0.050637  | -2.454001 |
| C  | -0.220340 | 0.741578  | -4.285556 |
| H  | 2.023363  | 0.538440  | -3.135677 |
| C  | -0.133997 | 0.495081  | -2.778515 |
| H  | 0.400017  | 1.599693  | -4.582694 |
| P  | 1.831285  | 0.374677  | -0.718361 |
| Ru | 0.108063  | 0.000730  | 0.777475  |
| H  | 3.664114  | 1.657297  | -2.614633 |
| H  | -5.507599 | 0.687867  | 1.637435  |
| H  | -3.045683 | 0.849649  | 1.648593  |
| C  | -4.983044 | 0.975966  | 0.723745  |
| C  | -3.594436 | 1.078735  | 0.735636  |
| C  | -0.507906 | 1.818288  | -2.063019 |
| C  | 3.391414  | 2.412414  | -1.871669 |
| H  | -1.284074 | 2.340987  | -2.638858 |
| C  | 2.519433  | 2.091354  | -0.816974 |
| H  | 1.108122  | 1.149066  | 1.715138  |
| H  | -6.787656 | 1.146079  | -0.453923 |
| C  | -5.698649 | 1.228774  | -0.444951 |
| H  | 0.355500  | 2.501932  | -2.065084 |
| P  | -1.059544 | 1.642645  | -0.311130 |
| C  | -2.892731 | 1.436527  | -0.425551 |
| H  | 4.622780  | 3.913026  | -2.800825 |
| C  | 3.947881  | 3.683338  | -1.973604 |
| C  | -5.014456 | 1.590002  | -1.603515 |
| C  | -3.624324 | 1.698128  | -1.594369 |
| C  | 2.255965  | 3.067802  | 0.148088  |
| H  | -5.563423 | 1.798079  | -2.524609 |
| H  | 1.605287  | 2.849929  | 0.995195  |
| H  | -3.129461 | 1.991351  | -2.522649 |
| C  | 3.654696  | 4.656802  | -1.016203 |

|   |           |           |           |
|---|-----------|-----------|-----------|
| C | -0.952650 | 3.330515  | 0.385605  |
| C | 2.816478  | 4.342781  | 0.049030  |
| H | -0.942059 | 2.601487  | 2.428941  |
| H | -0.961113 | 4.377679  | -1.518554 |
| H | 4.091325  | 5.654346  | -1.097722 |
| C | -0.931444 | 3.482115  | 1.778789  |
| C | -0.934632 | 4.469007  | -0.429800 |
| H | 2.587909  | 5.089310  | 0.812983  |
| C | -0.878585 | 4.753349  | 2.345876  |
| C | -0.877647 | 5.739035  | 0.141714  |
| H | -0.859812 | 4.859932  | 3.432396  |
| H | -0.857794 | 6.620830  | -0.502230 |
| C | -0.846919 | 5.883491  | 1.528104  |
| H | -0.802522 | 6.879741  | 1.973107  |
| C | 0.436602  | -2.794374 | 2.551153  |
| C | 2.254493  | -2.352286 | 3.966758  |
| C | 1.464125  | -3.515970 | 3.389838  |
| H | 0.054601  | -3.373067 | 1.696739  |
| H | -0.422668 | -2.464880 | 3.157782  |
| H | 3.235863  | -2.635430 | 4.367282  |
| H | 1.688608  | -1.862000 | 4.773576  |
| H | 2.107175  | -4.147680 | 2.755780  |
| H | 1.007304  | -4.164275 | 4.148058  |
| O | 1.127202  | -1.635034 | 2.037029  |
| C | 2.357805  | -1.434481 | 2.773097  |
| H | 2.440179  | -0.369007 | 3.029813  |
| H | 3.199388  | -1.710917 | 2.115052  |
| H | 0.634291  | 0.887637  | 2.383115  |
| O | -1.397777 | -0.340513 | 2.306940  |
| C | -1.092787 | -0.033616 | 3.508651  |
| H | -1.873777 | -0.309744 | 4.256235  |
| O | -0.058634 | 0.516382  | 3.899577  |

## VI-VII

|    |           |           |           |
|----|-----------|-----------|-----------|
| H  | 1.042937  | -6.491837 | -2.069734 |
| H  | -1.242105 | -5.857348 | -2.828252 |
| C  | 0.635142  | -5.511278 | -1.815312 |
| C  | -0.646122 | -5.155418 | -2.241148 |
| H  | 2.390929  | -4.883356 | -0.720901 |
| C  | 1.387395  | -4.613321 | -1.061181 |
| C  | -1.172883 | -3.908689 | -1.913923 |
| H  | -2.184193 | -3.649451 | -2.242234 |
| H  | -5.996953 | -1.916153 | -1.677234 |
| H  | -6.495154 | -2.737512 | 0.621235  |
| H  | 6.723785  | -2.652522 | -0.029459 |
| H  | 5.092736  | -3.403330 | -1.755857 |
| C  | 0.859970  | -3.363542 | -0.733762 |
| C  | -5.196355 | -2.002122 | -0.939036 |
| C  | -5.474859 | -2.461841 | 0.346135  |
| C  | -0.421079 | -2.996135 | -1.157779 |
| H  | -3.711390 | -1.301715 | -2.312860 |
| C  | 5.787194  | -2.109501 | -0.171953 |
| C  | -3.894827 | -1.649072 | -1.293820 |
| C  | 4.873320  | -2.531228 | -1.135538 |
| H  | 1.442160  | -2.664855 | -0.128923 |
| C  | -4.442613 | -2.571091 | 1.277334  |
| H  | -4.651264 | -2.931717 | 2.286970  |
| H  | 6.226344  | -0.631705 | 1.343451  |
| C  | 5.507877  | -0.979135 | 0.597913  |
| C  | -2.851597 | -1.745742 | -0.362103 |
| H  | -1.209401 | -1.343998 | -3.174803 |
| C  | -3.143324 | -2.213963 | 0.927407  |
| C  | 3.678421  | -1.835774 | -1.324596 |
| H  | 2.984005  | -2.186086 | -2.091258 |
| H  | 1.292969  | -1.135720 | -2.606691 |
| H  | -2.349050 | -2.275038 | 1.672232  |
| H  | 0.089756  | -0.144125 | -4.844774 |
| P  | -1.102972 | -1.333163 | -0.744793 |
| C  | 4.317349  | -0.284095 | 0.410028  |
| C  | -1.212614 | -0.538213 | -2.423047 |
| C  | 3.380864  | -0.709892 | -0.546237 |
| H  | 4.113354  | 0.606800  | 1.012587  |
| H  | -2.193599 | -0.047211 | -2.501515 |
| H  | -1.208463 | 1.038807  | -4.589527 |
| C  | 1.283087  | -0.045788 | -2.442091 |
| C  | -0.193205 | 0.753480  | -4.276172 |
| H  | 2.025468  | 0.368276  | -3.140531 |
| C  | -0.127279 | 0.499250  | -2.769368 |
| H  | 0.488264  | 1.564776  | -4.571588 |
| P  | 1.831555  | 0.267021  | -0.713653 |
| Ru | 0.123533  | -0.022468 | 0.779956  |
| H  | 3.595902  | 1.546719  | -2.704049 |
| H  | -5.364295 | 0.946711  | 1.749730  |
| H  | -2.899839 | 0.979988  | 1.703081  |
| C  | -4.847447 | 1.243848  | 0.834451  |
| C  | -3.455297 | 1.271614  | 0.811846  |
| C  | -0.404861 | 1.843529  | -2.054195 |
| C  | 3.412794  | 2.275667  | -1.909823 |
| H  | -1.168024 | 2.402440  | -2.612718 |
| C  | 2.601320  | 1.947993  | -0.810238 |
| H  | 1.132280  | 0.972565  | 1.811754  |
| H  | -6.668409 | 1.555731  | -0.287511 |
| C  | -5.576651 | 1.581459  | -0.303868 |
| H  | 0.494002  | 2.478486  | -2.089352 |
| P  | -0.915497 | 1.714700  | -0.283508 |
| C  | -2.762948 | 1.636383  | -0.352087 |
| H  | 4.646804  | 3.760725  | -2.860602 |
| C  | 4.021897  | 3.523753  | -1.996887 |
| C  | -4.902034 | 1.953606  | -1.464601 |
| C  | -3.508304 | 1.986058  | -1.488432 |
| C  | 2.455958  | 2.888521  | 0.213993  |
| H  | -5.461265 | 2.228134  | -2.361781 |
| H  | 1.855486  | 2.648492  | 1.091905  |
| H  | -3.021399 | 2.291523  | -2.416871 |
| C  | 3.845532  | 4.463851  | -0.979615 |



|   |           |           |           |
|---|-----------|-----------|-----------|
| C | -0.682193 | 3.409269  | 0.372589  |
| C | 3.071767  | 4.138453  | 0.130271  |
| H | -0.655135 | 2.721421  | 2.424750  |
| H | -0.681810 | 4.419757  | -1.551259 |
| H | 4.323266  | 5.443282  | -1.050203 |
| C | -0.613629 | 3.589507  | 1.760044  |
| C | -0.619794 | 4.529286  | -0.465704 |
| H | 2.936456  | 4.858486  | 0.940589  |
| C | -0.471222 | 4.865145  | 2.300220  |
| C | -0.471740 | 5.804770  | 0.076886  |
| H | -0.416522 | 4.992257  | 3.383417  |
| H | -0.416863 | 6.670741  | -0.586235 |
| C | -0.395429 | 5.975311  | 1.458360  |
| H | -0.280285 | 6.975754  | 1.880699  |
| C | 0.206454  | -2.891850 | 2.481896  |
| C | 2.214446  | -2.791802 | 3.709005  |
| C | 1.198567  | -3.793288 | 3.181839  |
| H | -0.298985 | -3.356900 | 1.621674  |
| H | -0.567323 | -2.519386 | 3.173309  |
| H | 3.177883  | -3.238511 | 3.984500  |
| H | 1.821951  | -2.265188 | 4.593112  |
| H | 1.672347  | -4.478420 | 2.460847  |
| H | 0.730263  | -4.407679 | 3.960952  |
| O | 0.984582  | -1.769767 | 2.007766  |
| C | 2.322744  | -1.843430 | 2.541361  |
| H | 2.644959  | -0.823459 | 2.795007  |
| H | 2.997078  | -2.239180 | 1.760374  |
| H | 0.738493  | 0.754478  | 2.699480  |
| O | -1.322308 | -0.230558 | 2.464736  |
| C | -0.888669 | 0.070325  | 3.599597  |
| H | -1.553807 | -0.102745 | 4.470645  |
| O | 0.246875  | 0.561554  | 3.850461  |

## VII

|    |           |           |           |
|----|-----------|-----------|-----------|
| H  | -0.000549 | -6.558206 | -2.162570 |
| H  | -2.177478 | -5.585918 | -2.878923 |
| C  | -0.256769 | -5.532086 | -1.890624 |
| C  | -1.477385 | -4.986505 | -2.293001 |
| H  | 1.587087  | -5.182993 | -0.816107 |
| C  | 0.629359  | -4.764135 | -1.137807 |
| C  | -1.810474 | -3.679533 | -1.945416 |
| H  | -2.775907 | -3.268667 | -2.256997 |
| H  | -6.261605 | -0.944551 | -1.664446 |
| H  | -6.873971 | -1.662423 | 0.640756  |
| H  | 6.246689  | -3.598774 | 0.015072  |
| H  | 4.531067  | -4.118762 | -1.713692 |
| C  | 0.294295  | -3.455392 | -0.788736 |
| C  | -5.481165 | -1.157066 | -0.930204 |
| C  | -5.823955 | -1.558801 | 0.358929  |
| C  | -0.923567 | -2.896934 | -1.190914 |
| H  | -3.908200 | -0.717130 | -2.316046 |
| C  | 5.401485  | -2.924573 | -0.138377 |
| C  | -4.141267 | -1.024334 | -1.294036 |
| C  | 4.439758  | -3.217169 | -1.103431 |
| H  | 0.980618  | -2.855084 | -0.185806 |
| C  | -4.817919 | -1.830365 | 1.285750  |
| H  | -5.076982 | -2.146798 | 2.298658  |
| H  | 6.047862  | -1.511215 | 1.364038  |
| C  | 5.289037  | -1.756561 | 0.617813  |
| C  | -3.121765 | -1.286188 | -0.368245 |
| H  | -1.448158 | -1.119784 | -3.181080 |
| C  | -3.480204 | -1.690771 | 0.926407  |
| C  | 3.361680  | -2.354575 | -1.307763 |
| H  | 2.626309  | -2.605736 | -2.075251 |
| H  | 1.070028  | -1.325642 | -2.579243 |
| H  | -2.701812 | -1.877444 | 1.668480  |
| H  | 0.039807  | -0.151893 | -4.839744 |
| P  | -1.327871 | -1.151405 | -0.746887 |
| C  | 4.215420  | -0.895564 | 0.414977  |
| C  | -1.313860 | -0.333877 | -2.420141 |
| C  | 3.230789  | -1.188331 | -0.542800 |
| H  | 4.140053  | 0.021067  | 1.008462  |
| H  | -2.200856 | 0.314270  | -2.487436 |
| H  | -1.052612 | 1.223181  | -4.583624 |
| C  | 1.236108  | -0.245224 | -2.436465 |
| C  | -0.096332 | 0.778720  | -4.270030 |
| H  | 2.026781  | 0.029507  | -3.150340 |
| C  | -0.072950 | 0.514824  | -2.763425 |
| H  | 0.706476  | 1.471003  | -4.564043 |
| P  | 1.840504  | 0.002765  | -0.716097 |
| Ru | 0.139797  | -0.043721 | 0.779473  |
| H  | 3.664904  | 1.091664  | -2.789323 |
| H  | -5.111283 | 1.689091  | 1.817475  |
| H  | -2.674499 | 1.340766  | 1.728813  |
| C  | -4.564101 | 1.942274  | 0.906519  |
| C  | -3.185140 | 1.752869  | 0.859026  |
| C  | -0.133997 | 1.885172  | -2.049040 |
| C  | 3.634198  | 1.805114  | -1.961547 |
| H  | -0.820906 | 2.546361  | -2.594332 |
| C  | 2.844016  | 1.555413  | -0.826890 |
| H  | 1.253340  | 0.748730  | 1.771383  |
| H  | -6.325786 | 2.582700  | -0.169486 |
| C  | -5.243610 | 2.439230  | -0.203479 |
| H  | 0.846580  | 2.381611  | -2.109471 |
| P  | -0.615096 | 1.836422  | -0.264370 |
| C  | -2.454717 | 2.056807  | -0.298541 |
| H  | 5.017014  | 3.134226  | -2.938329 |
| C  | 4.412781  | 2.955946  | -2.046198 |
| C  | -4.530527 | 2.753892  | -1.358274 |
| C  | -3.149165 | 2.570689  | -1.404426 |
| C  | 2.891683  | 2.468042  | 0.231749  |
| H  | -5.049033 | 3.152833  | -2.232936 |
| H  | 2.303701  | 2.278162  | 1.131078  |
| H  | -2.629940 | 2.842180  | -2.325768 |
| C  | 4.430982  | 3.871300  | -0.992320 |

|   |           |           |           |
|---|-----------|-----------|-----------|
| C | -0.105725 | 3.480355  | 0.369934  |
| C | 3.678711  | 3.617551  | 0.150705  |
| H | -0.139002 | 2.801651  | 2.421528  |
| H | 0.013628  | 4.471409  | -1.559849 |
| H | 5.041498  | 4.774109  | -1.061636 |
| C | 0.020684  | 3.654278  | 1.753866  |
| C | 0.115122  | 4.573749  | -0.476464 |
| H | 3.693061  | 4.318962  | 0.988189  |
| C | 0.373091  | 4.893009  | 2.283066  |
| C | 0.475731  | 5.811705  | 0.053766  |
| H | 0.470233  | 5.014946  | 3.364031  |
| H | 0.654030  | 6.655235  | -0.616574 |
| C | 0.606791  | 5.973881  | 1.431984  |
| H | 0.888246  | 6.945003  | 1.844619  |
| C | -0.237671 | -2.933108 | 2.429299  |
| C | 1.805044  | -3.296358 | 3.549325  |
| C | 0.603009  | -4.051829 | 3.003505  |
| H | -0.845056 | -3.226143 | 1.559435  |
| H | -0.914075 | -2.500428 | 3.186085  |
| H | 2.683564  | -3.929003 | 3.727387  |
| H | 1.556013  | -2.796023 | 4.498703  |
| H | 0.915770  | -4.744716 | 2.206318  |
| H | 0.063505  | -4.639803 | 3.756502  |
| O | 0.705239  | -1.918258 | 2.017652  |
| C | 2.029989  | -2.280829 | 2.457130  |
| H | 2.548657  | -1.361366 | 2.765130  |
| H | 2.583587  | -2.721327 | 1.608432  |
| H | 0.856292  | 0.524111  | 3.074001  |
| O | -1.292592 | -0.044277 | 2.555827  |
| C | -0.848947 | 0.120125  | 3.689822  |
| H | -1.502266 | 0.030422  | 4.577062  |
| O | 0.378373  | 0.408115  | 3.980898  |

## VIII

|    |           |           |           |
|----|-----------|-----------|-----------|
| H  | 5.055159  | 4.844890  | -0.820773 |
| H  | 5.589882  | 2.848865  | -2.212491 |
| C  | 4.467383  | 3.930745  | -0.714587 |
| C  | 4.764782  | 2.813437  | -1.498011 |
| H  | 3.188201  | 4.735700  | 0.830588  |
| C  | 3.426813  | 3.870362  | 0.207977  |
| C  | 4.017766  | 1.647286  | -1.363961 |
| H  | 4.281194  | 0.773566  | -1.968736 |
| H  | 5.399058  | -3.518141 | -1.305096 |
| H  | 6.244744  | -3.580483 | 1.035893  |
| H  | -0.141127 | 7.062502  | 1.562402  |
| H  | 0.197191  | 6.509957  | -0.841661 |
| C  | 2.678533  | 2.699713  | 0.342099  |
| C  | 4.958466  | -2.868918 | -0.545344 |
| C  | 5.432429  | -2.902946 | 0.764719  |
| C  | 2.955552  | 1.579786  | -0.447554 |
| H  | 3.567054  | -1.998839 | -1.928614 |
| C  | -0.273655 | 6.036895  | 1.211915  |
| C  | 3.920295  | -2.005604 | -0.894685 |
| C  | -0.083956 | 5.727578  | -0.133511 |
| H  | 1.864902  | 2.673809  | 1.070021  |
| C  | 4.870711  | -2.063180 | 1.727278  |
| H  | 5.243384  | -2.079951 | 2.753635  |
| H  | -0.803482 | 5.270667  | 3.161920  |
| C  | -0.642029 | 5.033073  | 2.108401  |
| C  | 3.345460  | -1.165022 | 0.067465  |
| H  | 2.313645  | 0.034047  | -2.699804 |
| C  | 3.834391  | -1.200457 | 1.381551  |
| C  | -0.250742 | 4.418765  | -0.584536 |
| H  | -0.096450 | 4.204076  | -1.644306 |
| H  | 0.805240  | 2.182679  | -1.881273 |
| H  | 3.395330  | -0.547294 | 2.141165  |
| H  | 0.897294  | 1.079447  | -4.340321 |
| P  | 1.991881  | 0.014278  | -0.289669 |
| C  | -0.806969 | 3.724841  | 1.660919  |
| C  | 1.522320  | -0.351599 | -2.037278 |
| C  | -0.604102 | 3.401828  | 0.311656  |
| H  | -1.100460 | 2.944184  | 2.370234  |
| H  | 1.524768  | -1.447569 | -2.162231 |
| H  | 0.472803  | -0.638435 | -4.482473 |
| C  | -0.134645 | 1.608035  | -1.917416 |
| C  | 0.178886  | 0.312755  | -4.015736 |
| H  | -0.784295 | 2.165390  | -2.608132 |
| C  | 0.148026  | 0.195621  | -2.490423 |
| H  | -0.808066 | 0.588343  | -4.416107 |
| P  | -0.846921 | 1.663160  | -0.216944 |
| Ru | 0.042713  | 0.043226  | 1.107136  |
| H  | -2.709300 | 2.068158  | -2.583534 |
| H  | 2.374163  | -5.025842 | 0.356512  |
| H  | 1.415024  | -2.776727 | 0.710732  |
| C  | 1.439723  | -4.754910 | -0.140736 |
| C  | 0.902638  | -3.480866 | 0.054815  |
| C  | -0.983289 | -0.786692 | -2.127956 |
| C  | -3.298784 | 1.875218  | -1.684049 |
| H  | -0.949304 | -1.657458 | -2.802189 |
| C  | -2.679325 | 1.623415  | -0.451495 |
| H  | -1.388102 | 0.025285  | 1.963892  |
| H  | 1.205476  | -6.669101 | -1.110332 |
| C  | 0.786930  | -5.671642 | -0.960220 |
| H  | -1.944440 | -0.287594 | -2.317946 |
| P  | -1.002090 | -1.430312 | -0.388042 |
| C  | -0.289567 | -3.113404 | -0.576961 |
| H  | -5.151361 | 2.076819  | -2.764607 |
| C  | -4.689295 | 1.883914  | -1.793936 |
| C  | -0.410990 | -5.316436 | -1.585001 |
| C  | -0.947991 | -4.047428 | -1.394240 |
| C  | -3.491761 | 1.401049  | 0.669751  |
| H  | -0.932265 | -6.035383 | -2.220551 |
| H  | -3.031335 | 1.193094  | 1.638932  |
| H  | -1.894870 | -3.785362 | -1.877467 |
| C  | -5.483496 | 1.658681  | -0.671721 |

|   |           |           |           |
|---|-----------|-----------|-----------|
| C | -2.768144 | -1.808091 | -0.069765 |
| C | -4.879341 | 1.422447  | 0.562332  |
| H | -2.316957 | -2.418387 | 1.958786  |
| H | -3.571357 | -1.316984 | -2.032355 |
| H | -6.572104 | 1.668569  | -0.758739 |
| C | -3.099037 | -2.289426 | 1.205355  |
| C | -3.784282 | -1.675432 | -1.023196 |
| H | -5.491932 | 1.242221  | 1.448448  |
| C | -4.413095 | -2.613449 | 1.526367  |
| C | -5.103112 | -1.996146 | -0.698789 |
| H | -4.650459 | -2.988746 | 2.523969  |
| H | -5.884884 | -1.877299 | -1.452356 |
| C | -5.422208 | -2.460362 | 0.574395  |
| H | -6.455305 | -2.709783 | 0.825104  |
| O | 0.891015  | -1.515887 | 2.507167  |
| C | 0.301787  | -1.876794 | 3.519889  |
| H | 0.744927  | -2.613580 | 4.211595  |
| O | -0.867797 | -1.456924 | 3.895995  |
| H | -1.176575 | -0.803055 | 3.187720  |
| H | 1.085596  | 1.107492  | 2.062687  |
| H | 0.302780  | 1.150058  | 2.443734  |

## VIII-IX

|    |           |           |           |
|----|-----------|-----------|-----------|
| H  | -4.485225 | 5.315374  | 0.729237  |
| H  | -3.490283 | 4.381365  | 2.811097  |
| C  | -4.004798 | 4.334958  | 0.715126  |
| C  | -3.447197 | 3.813271  | 1.879517  |
| H  | -4.390126 | 3.995043  | -1.385066 |
| C  | -3.950923 | 3.596104  | -0.468133 |
| C  | -2.838273 | 2.557204  | 1.866497  |
| H  | -2.420152 | 2.171437  | 2.799905  |
| H  | -5.590383 | -3.159070 | 1.056807  |
| H  | -6.067724 | -3.244571 | -1.383671 |
| H  | 1.105084  | 6.867770  | -1.000289 |
| H  | -0.953356 | 5.476719  | -1.237308 |
| C  | -3.335220 | 2.348361  | -0.486949 |
| C  | -5.010394 | -2.545788 | 0.363697  |
| C  | -5.278060 | -2.592809 | -1.003733 |
| C  | -2.772783 | 1.811136  | 0.683162  |
| H  | -3.831300 | -1.672640 | 1.933959  |
| C  | 1.123891  | 5.809991  | -0.730028 |
| C  | -4.010239 | -1.708400 | 0.856277  |
| C  | -0.027610 | 5.032955  | -0.864027 |
| H  | -3.276944 | 1.792912  | -1.427103 |
| C  | -4.536747 | -1.804997 | -1.884146 |
| H  | -4.741316 | -1.838416 | -2.956529 |
| H  | 3.205620  | 5.835458  | -0.158064 |
| C  | 2.301261  | 5.231703  | -0.257657 |
| C  | -3.256228 | -0.920904 | -0.021890 |
| H  | -2.163989 | 0.164179  | 2.961780  |
| C  | -3.524039 | -0.981482 | -1.398787 |
| C  | -0.000374 | 3.681482  | -0.525462 |
| H  | -0.900176 | 3.073050  | -0.650884 |
| H  | -0.268508 | 2.040498  | 2.159565  |
| H  | -2.924224 | -0.388959 | -2.099053 |
| H  | -0.460954 | 0.791032  | 4.583403  |
| P  | -1.916678 | 0.195174  | 0.528921  |
| C  | 2.335640  | 3.879815  | 0.083107  |
| C  | -1.486758 | -0.319085 | 2.240993  |
| C  | 1.181153  | 3.094032  | -0.043284 |
| H  | 3.268533  | 3.438586  | 0.442706  |
| H  | -1.701293 | -1.398073 | 2.314510  |
| H  | -0.378224 | -0.981545 | 4.592333  |
| C  | 0.527951  | 1.279969  | 2.125598  |
| C  | 0.072067  | -0.074682 | 4.163363  |
| H  | 1.309384  | 1.664791  | 2.798794  |
| C  | -0.006215 | -0.084701 | 2.636397  |
| H  | 1.114291  | -0.024003 | 4.511410  |
| P  | 1.165762  | 1.314977  | 0.396784  |
| Ru | -0.087989 | 0.076633  | -0.944855 |
| H  | 3.186871  | 1.037521  | 2.650790  |
| H  | -2.552336 | -4.399455 | -2.120378 |
| H  | -0.964103 | -2.523710 | -1.823369 |
| C  | -2.028580 | -4.280150 | -1.169621 |
| C  | -1.132725 | -3.228652 | -0.999037 |
| C  | 0.871051  | -1.247259 | 2.124281  |
| C  | 3.666435  | 0.819121  | 1.693235  |
| H  | 0.668630  | -2.150030 | 2.720191  |
| C  | 2.945666  | 0.886911  | 0.492666  |
| H  | 1.107718  | -0.068272 | -2.143263 |
| H  | -2.966242 | -5.994230 | -0.250156 |
| C  | -2.259873 | -5.171210 | -0.122556 |
| H  | 1.927112  | -1.001309 | 2.309536  |
| P  | 0.705428  | -1.632055 | 0.322071  |
| C  | -0.455117 | -3.050898 | 0.215766  |
| H  | 5.563162  | 0.416882  | 2.634048  |
| C  | 5.016321  | 0.468069  | 1.690130  |
| C  | -1.583578 | -5.012877 | 1.086470  |
| C  | -0.681355 | -3.963336 | 1.254503  |
| C  | 3.612582  | 0.614743  | -0.711161 |
| H  | -1.753137 | -5.715560 | 1.905034  |
| H  | 3.065360  | 0.665562  | -1.657530 |
| H  | -0.150249 | -3.874603 | 2.205725  |
| C  | 5.663989  | 0.188053  | 0.488584  |

|   |           |           |           |
|---|-----------|-----------|-----------|
| C | 2.317362  | -2.380629 | -0.133182 |
| C | 4.960605  | 0.269172  | -0.713126 |
| H | 1.836230  | -2.279606 | -2.239863 |
| H | 3.100955  | -2.648917 | 1.878303  |
| H | 6.719541  | -0.092212 | 0.488229  |
| C | 2.578102  | -2.585654 | -1.495333 |
| C | 3.276683  | -2.774749 | 0.807332  |
| H | 5.462008  | 0.053585  | -1.659030 |
| C | 3.774909  | -3.161214 | -1.910071 |
| C | 4.481410  | -3.340720 | 0.388913  |
| H | 3.962260  | -3.317149 | -2.974623 |
| H | 5.224993  | -3.635282 | 1.132796  |
| C | 4.734340  | -3.532859 | -0.967271 |
| H | 5.677369  | -3.978380 | -1.290966 |
| O | -0.896201 | 1.090401  | -2.630850 |
| C | 0.283541  | 0.978747  | -3.119890 |
| H | 0.475934  | 0.289166  | -3.959195 |
| O | 1.100462  | 2.040123  | -3.209997 |
| H | 0.781705  | 2.731123  | -2.601689 |

# IX

|    |           |           |           |
|----|-----------|-----------|-----------|
| H  | -1.947313 | 6.391155  | 0.009945  |
| H  | -2.362515 | 5.327477  | 2.221155  |
| C  | -1.905584 | 5.304453  | 0.110431  |
| C  | -2.134502 | 4.709604  | 1.349976  |
| H  | -1.444092 | 4.969442  | -1.974656 |
| C  | -1.624841 | 4.509424  | -1.000752 |
| C  | -2.082677 | 3.322055  | 1.482830  |
| H  | -2.278704 | 2.880179  | 2.463494  |
| H  | -6.297965 | -1.005362 | 1.291192  |
| H  | -6.925964 | -0.975144 | -1.117247 |
| H  | 2.081784  | 6.344733  | -1.614023 |
| H  | 1.867239  | 6.039348  | 0.846063  |
| C  | -1.561430 | 3.125372  | -0.868609 |
| C  | -5.575691 | -0.678374 | 0.540113  |
| C  | -5.926990 | -0.659717 | -0.808422 |
| C  | -1.787115 | 2.516834  | 0.375836  |
| H  | -4.057690 | -0.289726 | 2.003676  |
| C  | 1.959419  | 5.343175  | -1.196181 |
| C  | -4.302461 | -0.274307 | 0.939260  |
| C  | 1.839513  | 5.172551  | 0.182125  |
| H  | -1.320495 | 2.505694  | -1.740976 |
| C  | -5.001634 | -0.231568 | -1.760851 |
| H  | -5.272697 | -0.212315 | -2.818664 |
| H  | 2.019637  | 4.361538  | -3.120793 |
| C  | 1.925274  | 4.232989  | -2.040436 |
| C  | -3.365419 | 0.144978  | -0.014644 |
| H  | -2.042938 | 0.924960  | 2.824363  |
| C  | -3.726000 | 0.167602  | -1.370632 |
| C  | 1.687893  | 3.895892  | 0.721894  |
| H  | 1.606996  | 3.784766  | 1.806226  |
| H  | 0.248413  | 2.158824  | 2.286460  |
| H  | -2.995528 | 0.467312  | -2.126361 |
| H  | -0.395311 | 1.064008  | 4.610275  |
| P  | -1.674895 | 0.686998  | 0.423733  |
| C  | 1.762831  | 2.957670  | -1.506401 |
| C  | -1.493922 | 0.207300  | 2.195454  |
| C  | 1.644834  | 2.777836  | -0.119440 |
| H  | 1.713252  | 2.090475  | -2.175991 |
| H  | -2.018960 | -0.754080 | 2.317497  |
| H  | -0.775908 | -0.669745 | 4.637307  |
| C  | 0.835071  | 1.228257  | 2.227432  |
| C  | -0.077622 | 0.079466  | 4.237216  |
| H  | 1.687333  | 1.375968  | 2.907078  |
| C  | -0.045625 | 0.051721  | 2.709599  |
| H  | 0.915269  | -0.131575 | 4.660891  |
| P  | 1.416529  | 1.068993  | 0.490750  |
| Ru | 0.017199  | -0.039455 | -0.897170 |
| H  | 3.379748  | 0.423119  | 2.750789  |
| H  | -3.921219 | -3.492723 | -1.529880 |
| H  | -1.898513 | -2.064086 | -1.434774 |
| C  | -3.262532 | -3.548867 | -0.660466 |
| C  | -2.120274 | -2.751625 | -0.609790 |
| C  | 0.540101  | -1.313321 | 2.272316  |
| C  | 3.831538  | 0.197839  | 1.781466  |
| H  | 0.137182  | -2.110631 | 2.914947  |
| C  | 3.131649  | 0.418042  | 0.587922  |
| H  | -4.470759 | -5.013712 | 0.367398  |
| C  | -3.569502 | -4.397897 | 0.400887  |
| H  | 1.627636  | -1.310290 | 2.444038  |
| P  | 0.231760  | -1.743001 | 0.506947  |
| C  | -1.267292 | -2.803008 | 0.502764  |
| H  | 5.661160  | -0.480892 | 2.696923  |
| C  | 5.128415  | -0.317589 | 1.757474  |
| C  | -2.720574 | -4.464812 | 1.506361  |
| C  | -1.570964 | -3.679465 | 1.555184  |
| C  | 3.765113  | 0.122268  | -0.630415 |
| H  | -2.950497 | -5.138843 | 2.334209  |
| H  | 3.236866  | 0.294973  | -1.572354 |
| H  | -0.907878 | -3.769302 | 2.419891  |
| C  | 5.744944  | -0.611376 | 0.543145  |
| C  | 1.567164  | -2.874678 | -0.019641 |



|   |           |           |           |
|---|-----------|-----------|-----------|
| C | 5.060921  | -0.385204 | -0.651863 |
| H | 0.375039  | -3.527251 | -1.712425 |
| H | 3.011351  | -2.457559 | 1.550976  |
| H | 6.761909  | -1.009168 | 0.527172  |
| C | 1.350266  | -3.584902 | -1.215389 |
| C | 2.804077  | -2.995540 | 0.623761  |
| H | 5.540814  | -0.604840 | -1.608084 |
| C | 2.353670  | -4.384416 | -1.756881 |
| C | 3.803241  | -3.804963 | 0.082791  |
| H | 2.168488  | -4.938092 | -2.680016 |
| H | 4.761103  | -3.892024 | 0.600449  |
| C | 3.585797  | -4.493252 | -1.108382 |
| H | 4.371250  | -5.124417 | -1.528753 |
| O | -0.906766 | -0.188537 | -2.728723 |
| C | 0.071073  | -0.714085 | -3.479696 |
| H | -0.071523 | -1.787307 | -3.737085 |
| O | 1.307086  | -0.630256 | -2.654252 |
| H | 1.728816  | -1.501006 | -2.575536 |
| H | 0.274039  | -0.150525 | -4.411047 |

**X**

|    |           |           |           |
|----|-----------|-----------|-----------|
| H  | 5.713083  | -3.891358 | -0.962780 |
| H  | 4.476028  | -3.335905 | -3.052682 |
| C  | 4.697765  | -3.492943 | -0.910092 |
| C  | 4.006518  | -3.181385 | -2.078819 |
| H  | 4.609334  | -3.563403 | 1.247224  |
| C  | 4.079439  | -3.306656 | 0.326854  |
| C  | 2.706908  | -2.677876 | -2.012857 |
| H  | 2.197302  | -2.441800 | -2.950044 |
| H  | -2.256807 | -6.046628 | -0.574090 |
| H  | -2.324413 | -6.187438 | 1.909304  |
| H  | 6.715501  | 2.116481  | 0.055385  |
| H  | 5.969274  | 0.019452  | -1.072274 |
| C  | 2.783162  | -2.803675 | 0.395409  |
| C  | -1.771929 | -5.277782 | 0.031401  |
| C  | -1.809732 | -5.355912 | 1.423019  |
| C  | 2.080652  | -2.474728 | -0.774636 |
| H  | -1.082788 | -4.184984 | -1.686794 |
| C  | 5.651895  | 1.926684  | -0.104386 |
| C  | -1.112156 | -4.221439 | -0.594490 |
| C  | 5.235101  | 0.755422  | -0.736158 |
| H  | 2.309182  | -2.662392 | 1.369375  |
| C  | -1.188204 | -4.372475 | 2.192680  |
| H  | -1.214802 | -4.430471 | 3.282971  |
| H  | 5.016978  | 3.772518  | 0.822472  |
| C  | 4.702344  | 2.854003  | 0.322608  |
| C  | -0.496179 | -3.224441 | 0.171873  |
| H  | 0.262867  | -2.351758 | -2.958393 |
| C  | -0.539672 | -3.308447 | 1.571322  |
| C  | 3.879205  | 0.517811  | -0.950914 |
| H  | 3.582319  | -0.408223 | -1.445255 |
| H  | 1.885255  | -0.114478 | -2.724583 |
| H  | -0.078708 | -2.520900 | 2.178906  |
| H  | 0.498265  | -0.811799 | -4.830469 |
| P  | 0.380536  | -1.803549 | -0.579190 |
| C  | 3.345110  | 2.621875  | 0.104873  |
| C  | -0.279338 | -1.665733 | -2.292011 |
| C  | 2.915793  | 1.455197  | -0.547747 |
| H  | 2.619283  | 3.366475  | 0.440397  |
| H  | -1.312551 | -2.046858 | -2.264378 |
| H  | -1.264413 | -0.966672 | -4.687166 |
| C  | 1.012634  | 0.536330  | -2.553492 |
| C  | -0.401271 | -0.349409 | -4.397870 |
| H  | 1.133105  | 1.375146  | -3.256441 |
| C  | -0.289255 | -0.234103 | -2.877923 |
| H  | -0.525188 | 0.637504  | -4.866686 |
| P  | 1.120773  | 1.164066  | -0.820220 |
| Ru | -0.038362 | -0.007292 | 0.703454  |
| H  | 1.036444  | 3.375437  | -2.896747 |
| H  | -4.354604 | -3.131502 | 1.906770  |
| H  | -2.710328 | -1.290629 | 1.630010  |
| C  | -4.224607 | -2.665075 | 0.927487  |
| C  | -3.304963 | -1.629964 | 0.775983  |
| C  | -1.511594 | 0.557366  | -2.363641 |
| C  | 0.564672  | 3.724502  | -1.974121 |
| H  | -2.405348 | 0.317572  | -2.958749 |
| C  | 0.462016  | 2.882127  | -0.859087 |
| H  | -5.680242 | -3.930016 | -0.047367 |
| C  | -4.965150 | -3.112990 | -0.165569 |
| H  | -1.326397 | 1.627947  | -2.536031 |
| P  | -1.905891 | 0.351407  | -0.574951 |
| C  | -3.122943 | -1.020941 | -0.475136 |
| H  | 0.162024  | 5.676262  | -2.794997 |
| C  | 0.081231  | 5.031193  | -1.917446 |
| C  | -4.790930 | -2.513210 | -1.411730 |
| C  | -3.880670 | -1.468294 | -1.566282 |
| C  | -0.113277 | 3.384242  | 0.316939  |
| H  | -5.372309 | -2.853810 | -2.271228 |
| H  | -0.205643 | 2.727953  | 1.191576  |
| H  | -3.776692 | -1.009472 | -2.552689 |
| C  | -0.489522 | 5.518632  | -0.741494 |
| C  | -2.920382 | 1.823903  | -0.164333 |

|   |           |           |           |
|---|-----------|-----------|-----------|
| C | -0.579587 | 4.695004  | 0.379481  |
| H | -3.279248 | 1.095437  | 1.840132  |
| H | -2.770719 | 2.845139  | -2.083877 |
| H | -0.863137 | 6.543999  | -0.699608 |
| C | -3.467111 | 1.900923  | 1.127711  |
| C | -3.169906 | 2.865355  | -1.068222 |
| H | -1.029373 | 5.070779  | 1.301512  |
| C | -4.227466 | 3.004316  | 1.505758  |
| C | -3.935574 | 3.965728  | -0.684502 |
| H | -4.650647 | 3.049127  | 2.511980  |
| H | -4.119812 | 4.768015  | -1.402619 |
| C | -4.461728 | 4.042191  | 0.602687  |
| H | -5.062968 | 4.904192  | 0.899703  |
| O | -1.198278 | 0.247614  | 2.371477  |
| C | -0.731535 | 0.461762  | 3.622719  |
| H | -1.550258 | 0.377638  | 4.365998  |
| O | -0.148854 | 1.771119  | 3.752077  |
| H | -0.824463 | 2.413014  | 3.492995  |
| H | 0.085314  | -0.218613 | 3.942301  |
| O | 1.771433  | -0.296436 | 1.991342  |
| O | 2.377258  | 1.562898  | 3.102069  |
| H | 1.393378  | 1.740340  | 3.195923  |
| C | 2.622568  | 0.404021  | 2.549647  |
| C | 4.041592  | -0.024017 | 2.669770  |
| H | 4.700849  | 0.787523  | 2.335305  |
| H | 4.283360  | -0.202768 | 3.726305  |
| H | 4.233355  | -0.928204 | 2.085564  |

**X-XI**

|    |           |           |           |
|----|-----------|-----------|-----------|
| H  | -5.221767 | -4.123322 | -0.978624 |
| H  | -4.459970 | -3.065630 | -3.101284 |
| C  | -4.558426 | -3.256054 | -0.952235 |
| C  | -4.129892 | -2.666827 | -2.139588 |
| H  | -4.460209 | -3.193658 | 1.204950  |
| C  | -4.133839 | -2.734196 | 0.269229  |
| C  | -3.282216 | -1.559633 | -2.106949 |
| H  | -2.972536 | -1.117453 | -3.056696 |
| H  | -3.062877 | 5.050276  | 0.570907  |
| H  | -5.495145 | 4.710683  | 0.127134  |
| H  | -2.269072 | -6.381593 | 0.959340  |
| H  | -1.785789 | -5.953689 | -1.444672 |
| C  | -3.283469 | -1.632603 | 0.302572  |
| C  | -3.430230 | 4.081522  | 0.224461  |
| C  | -4.789340 | 3.890751  | -0.022472 |
| C  | -2.844237 | -1.029953 | -0.885439 |
| H  | -1.473983 | 3.192446  | 0.259384  |
| C  | -1.749187 | -5.469048 | 0.659742  |
| C  | -2.530160 | 3.034751  | 0.040093  |
| C  | -1.478291 | -5.229595 | -0.686901 |
| H  | -2.944006 | -1.241009 | 1.265466  |
| C  | -5.244828 | 2.647107  | -0.456563 |
| H  | -6.308053 | 2.488572  | -0.649198 |
| H  | -1.552397 | -4.721140 | 2.678970  |
| C  | -1.349618 | -4.541709 | 1.620812  |
| C  | -2.977726 | 1.782462  | -0.406327 |
| H  | -2.026716 | 0.563477  | -3.149847 |
| C  | -4.347752 | 1.597331  | -0.648599 |
| C  | -0.804557 | -4.072228 | -1.074975 |
| H  | -0.580776 | -3.921383 | -2.134229 |
| H  | -0.734884 | -1.846721 | -2.570210 |
| H  | -4.724993 | 0.630535  | -0.990192 |
| H  | -0.639156 | -0.598482 | -4.787359 |
| P  | -1.759319 | 0.445179  | -0.729879 |
| C  | -0.693094 | -3.376349 | 1.232545  |
| C  | -1.213275 | 0.801679  | -2.448516 |
| C  | -0.409995 | -3.129629 | -0.117262 |
| H  | -0.396720 | -2.651300 | 1.993814  |
| H  | -1.104471 | 1.896514  | -2.510853 |
| H  | -0.006978 | 1.058503  | -4.835833 |
| C  | 0.214141  | -1.334871 | -2.348558 |
| C  | 0.147272  | 0.062963  | -4.394973 |
| H  | 0.978449  | -1.874678 | -2.928499 |
| C  | 0.109683  | 0.122027  | -2.866601 |
| H  | 1.112726  | -0.316970 | -4.759806 |
| P  | 0.552352  | -1.624349 | -0.540871 |
| Ru | 0.008208  | 0.177332  | 0.736948  |
| H  | 2.965934  | -1.230613 | -2.288499 |
| H  | 0.983310  | 5.436701  | 2.107983  |
| H  | 1.529026  | 3.058362  | 1.667640  |
| C  | 0.847735  | 5.026674  | 1.105049  |
| C  | 1.161059  | 3.694243  | 0.856411  |
| C  | 1.294283  | 0.982260  | -2.399591 |
| C  | 3.222542  | -1.929167 | -1.490056 |
| H  | 1.303679  | 1.928116  | -2.962302 |
| C  | 2.263728  | -2.319648 | -0.545117 |
| H  | 0.121796  | 6.884110  | 0.271101  |
| C  | 0.365857  | 5.837662  | 0.075709  |
| H  | 2.244133  | 0.495702  | -2.663247 |
| P  | 1.370342  | 1.369562  | -0.590686 |
| C  | 0.994561  | 3.152954  | -0.429052 |
| H  | 5.251544  | -2.100932 | -2.188634 |
| C  | 4.524331  | -2.422371 | -1.439917 |
| C  | 0.205165  | 5.311418  | -1.204424 |
| C  | 0.517551  | 3.975512  | -1.457251 |
| C  | 2.645392  | -3.240181 | 0.443709  |
| H  | -0.163690 | 5.942659  | -2.015562 |
| H  | 1.911044  | -3.609780 | 1.163800  |
| H  | 0.381471  | 3.592545  | -2.471751 |
| C  | 4.895646  | -3.315984 | -0.437966 |
| C  | 3.180493  | 1.356601  | -0.286675 |

|   |           |           |           |
|---|-----------|-----------|-----------|
| C | 3.949753  | -3.727108 | 0.500295  |
| H | 3.496030  | 3.000373  | -1.672344 |
| H | 3.193837  | -0.254923 | 1.140433  |
| H | 5.915752  | -3.703330 | -0.396750 |
| C | 3.968001  | 2.273138  | -1.003605 |
| C | 3.801193  | 0.453773  | 0.580670  |
| H | 4.221942  | -4.447956 | 1.274282  |
| C | 5.352241  | 2.273653  | -0.860974 |
| C | 5.188241  | 0.463933  | 0.727528  |
| H | 5.954948  | 2.990526  | -1.422622 |
| H | 5.662526  | -0.246688 | 1.408443  |
| C | 5.964935  | 1.367733  | 0.007114  |
| H | 7.050864  | 1.373450  | 0.123877  |
| O | 1.334500  | 0.078079  | 2.424763  |
| C | 1.601670  | -1.008721 | 3.091044  |
| H | 1.820976  | -1.921197 | 2.496668  |
| O | 0.365435  | -1.511540 | 3.917259  |
| H | -0.678114 | -0.894381 | 3.350027  |
| H | 2.380899  | -0.888538 | 3.872739  |
| O | -1.331375 | -0.294866 | 2.681122  |
| O | -0.829737 | 1.765097  | 2.131507  |
| C | -1.277621 | 0.999372  | 2.979978  |
| H | 0.485971  | -1.259282 | 4.841638  |
| C | -1.774169 | 1.431416  | 4.308949  |
| H | -2.826381 | 1.142697  | 4.429149  |
| H | -1.214198 | 0.913807  | 5.100056  |
| H | -1.667641 | 2.511592  | 4.437866  |

# XI

|    |           |           |           |
|----|-----------|-----------|-----------|
| H  | 1.158983  | -6.602967 | -0.894041 |
| H  | 0.043468  | -5.647883 | -2.905531 |
| C  | 0.713383  | -5.606734 | -0.851903 |
| C  | 0.091965  | -5.071479 | -1.979186 |
| H  | 1.250483  | -5.275990 | 1.213832  |
| C  | 0.762516  | -4.865409 | 0.327036  |
| C  | -0.481337 | -3.802023 | -1.927634 |
| H  | -0.975722 | -3.419189 | -2.823609 |
| H  | -6.185807 | -1.794787 | -0.912825 |
| H  | -6.391104 | -2.811144 | 1.350559  |
| H  | 4.939966  | -4.805903 | 0.602905  |
| H  | 4.410742  | -4.325925 | -1.782703 |
| C  | 0.204504  | -3.589653 | 0.378537  |
| C  | -5.294375 | -1.966869 | -0.305700 |
| C  | -5.409017 | -2.535696 | 0.960635  |
| C  | -0.424671 | -3.042961 | -0.749790 |
| H  | -3.985135 | -1.152356 | -1.796477 |
| C  | 4.315844  | -3.948510 | 0.341857  |
| C  | -4.042469 | -1.609013 | -0.805911 |
| C  | 4.018501  | -3.681040 | -0.993278 |
| H  | 0.276134  | -3.002913 | 1.298615  |
| C  | -4.263705 | -2.762260 | 1.725889  |
| H  | -4.345488 | -3.218715 | 2.714694  |
| H  | 4.053847  | -3.311207 | 2.388534  |
| C  | 3.819132  | -3.111428 | 1.340140  |
| C  | -2.890021 | -1.825547 | -0.041728 |
| H  | -1.638987 | -1.607971 | -2.976094 |
| C  | -3.013500 | -2.413828 | 1.226211  |
| C  | 3.225442  | -2.585572 | -1.331292 |
| H  | 3.024208  | -2.392981 | -2.387445 |
| H  | 1.084053  | -1.658707 | -2.582329 |
| H  | -2.117248 | -2.613712 | 1.821627  |
| H  | -0.119003 | -1.022167 | -4.776637 |
| P  | -1.201034 | -1.382991 | -0.588528 |
| C  | 3.016058  | -2.023430 | 1.008012  |
| C  | -1.400503 | -0.764271 | -2.312063 |
| C  | 2.707401  | -1.751654 | -0.331230 |
| H  | 2.627049  | -1.380453 | 1.799914  |
| H  | -2.297533 | -0.124884 | -2.323693 |
| H  | -1.267117 | 0.332549  | -4.763217 |
| C  | 1.143936  | -0.566973 | -2.453744 |
| C  | -0.283780 | -0.001242 | -4.401899 |
| H  | 1.939006  | -0.237716 | -3.139806 |
| C  | -0.207025 | 0.047521  | -2.875795 |
| H  | 0.476576  | 0.647871  | -4.860695 |
| P  | 1.676889  | -0.279243 | -0.707844 |
| Ru | -0.070661 | 0.103028  | 0.717758  |
| H  | 2.851272  | 1.521494  | -2.889069 |
| H  | -5.440350 | 1.218945  | 0.937498  |
| H  | -3.008723 | 0.773761  | 0.979032  |
| C  | -4.793554 | 1.700968  | 0.200795  |
| C  | -3.421581 | 1.441479  | 0.220314  |
| C  | -0.306173 | 1.524826  | -2.440464 |
| C  | 3.334734  | 1.726899  | -1.930096 |
| H  | -1.046095 | 2.049368  | -3.064252 |
| C  | 2.969229  | 1.026847  | -0.773336 |
| H  | -6.405973 | 2.761674  | -0.766086 |
| C  | -5.332298 | 2.562052  | -0.750719 |
| H  | 0.656039  | 2.025089  | -2.627400 |
| P  | -0.766285 | 1.750334  | -0.670750 |
| C  | -2.578659 | 2.046591  | -0.718910 |
| H  | 4.611594  | 3.230651  | -2.799701 |
| C  | 4.335446  | 2.698970  | -1.886292 |
| C  | -4.494579 | 3.183043  | -1.680602 |
| C  | -3.126074 | 2.933193  | -1.661588 |
| C  | 3.642781  | 1.308369  | 0.428035  |
| H  | -4.909616 | 3.872992  | -2.418416 |
| H  | 3.396671  | 0.758587  | 1.344670  |
| H  | -2.481329 | 3.451839  | -2.377742 |
| C  | 4.987797  | 2.980263  | -0.688151 |
| C  | -0.140275 | 3.399646  | -0.187607 |

|   |           |           |           |
|---|-----------|-----------|-----------|
| C | 4.642180  | 2.277692  | 0.467109  |
| H | -1.597112 | 3.520947  | 1.414459  |
| H | 1.453864  | 3.587711  | -1.653329 |
| H | 5.774880  | 3.736520  | -0.656706 |
| C | -0.739354 | 4.001619  | 0.932311  |
| C | 0.960284  | 4.026368  | -0.784483 |
| H | 5.161423  | 2.478669  | 1.407135  |
| C | -0.244232 | 5.199434  | 1.441502  |
| C | 1.454460  | 5.227316  | -0.271864 |
| H | -0.723868 | 5.658368  | 2.308828  |
| H | 2.311677  | 5.704471  | -0.752293 |
| C | 0.857093  | 5.814493  | 0.841811  |
| H | 1.243434  | 6.755258  | 1.239420  |
| O | 0.857073  | 1.460894  | 2.205558  |
| C | 1.516051  | 2.463543  | 2.378249  |
| H | 1.894861  | 3.087893  | 1.539894  |
| O | 2.647854  | 0.030410  | 3.696199  |
| H | 1.827385  | -0.433996 | 3.455543  |
| H | 1.776703  | 2.778319  | 3.410320  |
| O | 0.219479  | -1.171118 | 2.562184  |
| O | -1.518077 | 0.147422  | 2.391569  |
| C | -0.818073 | -0.641797 | 3.085717  |
| H | 3.174712  | -0.646243 | 4.134407  |
| C | -1.171207 | -0.934437 | 4.502976  |
| H | -0.992811 | -1.990196 | 4.739561  |
| H | -0.518697 | -0.342050 | 5.160623  |
| H | -2.210060 | -0.664331 | 4.718212  |

## XII

|    |           |           |           |
|----|-----------|-----------|-----------|
| H  | -5.715267 | -3.502543 | -0.875191 |
| H  | -5.092587 | -2.241116 | -2.931560 |
| C  | -4.942835 | -2.731614 | -0.832606 |
| C  | -4.592712 | -2.028463 | -1.984126 |
| H  | -4.568186 | -2.991704 | 1.278498  |
| C  | -4.302919 | -2.444285 | 0.371234  |
| C  | -3.609458 | -1.041932 | -1.931862 |
| H  | -3.371151 | -0.502215 | -2.851106 |
| H  | -3.792971 | 5.062058  | -1.195376 |
| H  | -4.866889 | 5.021640  | 1.050293  |
| H  | -2.752614 | -6.273347 | 1.093061  |
| H  | -2.347001 | -5.874223 | -1.329630 |
| C  | -3.310118 | -1.468057 | 0.425808  |
| C  | -3.656349 | 4.201213  | -0.537237 |
| C  | -4.256934 | 4.178504  | 0.719449  |
| C  | -2.949854 | -0.754698 | -0.727250 |
| H  | -2.403635 | 3.180096  | -1.947576 |
| C  | -2.163066 | -5.411632 | 0.772440  |
| C  | -2.873318 | 3.128307  | -0.962722 |
| C  | -1.937002 | -5.188160 | -0.585259 |
| H  | -2.794607 | -1.273400 | 1.369497  |
| C  | -4.085561 | 3.070068  | 1.550431  |
| H  | -4.564514 | 3.040480  | 2.531630  |
| H  | -1.812669 | -4.701510 | 2.783121  |
| C  | -1.634793 | -4.533811 | 1.718618  |
| C  | -2.690332 | 2.016688  | -0.132126 |
| H  | -1.964238 | 0.783911  | -2.985929 |
| C  | -3.311251 | 1.995300  | 1.125984  |
| C  | -1.180364 | -4.093348 | -0.999540 |
| H  | -1.000672 | -3.947338 | -2.067879 |
| H  | -1.069778 | -1.788470 | -2.451087 |
| H  | -3.198868 | 1.118892  | 1.771796  |
| H  | -0.830090 | -0.534578 | -4.692279 |
| P  | -1.672311 | 0.563700  | -0.576598 |
| C  | -0.892931 | -3.428404 | 1.308938  |
| C  | -1.109931 | 0.880314  | -2.300559 |
| C  | -0.658110 | -3.200999 | -0.054674 |
| H  | -0.524297 | -2.715378 | 2.052596  |
| H  | -0.816424 | 1.940783  | -2.354307 |
| H  | 0.034565  | 1.016022  | -4.726945 |
| C  | -0.032951 | -1.447767 | -2.300952 |
| C  | 0.055891  | -0.003095 | -4.314908 |
| H  | 0.583546  | -2.103132 | -2.935330 |
| C  | 0.080552  | 0.016261  | -2.786214 |
| H  | 0.944299  | -0.507789 | -4.722469 |
| P  | 0.365831  | -1.757908 | -0.524206 |
| Ru | 0.075329  | 0.069120  | 0.808998  |
| H  | 2.609891  | -2.102593 | -2.579586 |
| H  | -0.776457 | 5.482350  | 0.808671  |
| H  | -0.314013 | 3.057918  | 0.965115  |
| C  | -0.088692 | 5.019873  | 0.096954  |
| C  | 0.164400  | 3.649246  | 0.181638  |
| C  | 1.411144  | 0.661018  | -2.340516 |
| C  | 2.910824  | -2.535373 | -1.621946 |
| H  | 1.643671  | 1.514117  | -2.996146 |
| C  | 2.042297  | -2.524456 | -0.523284 |
| H  | 0.321663  | 6.859573  | -0.955441 |
| C  | 0.524145  | 5.788411  | -0.888305 |
| H  | 2.231813  | -0.056945 | -2.479174 |
| P  | 1.414492  | 1.244618  | -0.591418 |
| C  | 1.039012  | 3.039164  | -0.724925 |
| H  | 4.831011  | -3.128215 | -2.401932 |
| C  | 4.173781  | -3.122904 | -1.529328 |
| C  | 1.411977  | 5.189432  | -1.785507 |
| C  | 1.674538  | 3.825789  | -1.700499 |
| C  | 2.466013  | -3.144287 | 0.665134  |
| H  | 1.909772  | 5.790845  | -2.549181 |
| H  | 1.788493  | -3.191438 | 1.523216  |
| H  | 2.397072  | 3.380634  | -2.391328 |
| C  | 4.589096  | -3.712720 | -0.338232 |
| C  | 3.165433  | 1.287063  | -0.067288 |



|   |           |           |           |
|---|-----------|-----------|-----------|
| C | 3.725932  | -3.729540 | 0.758238  |
| H | 2.646729  | 2.597152  | 1.581614  |
| H | 4.017715  | -0.024006 | -1.576463 |
| H | 5.574925  | -4.176844 | -0.269121 |
| C | 3.444009  | 2.021364  | 1.099099  |
| C | 4.195460  | 0.553365  | -0.667399 |
| H | 4.030512  | -4.215026 | 1.688257  |
| C | 4.721484  | 2.012009  | 1.652879  |
| C | 5.475048  | 0.543902  | -0.108073 |
| H | 4.924978  | 2.591851  | 2.555861  |
| H | 6.268739  | -0.032195 | -0.589327 |
| C | 5.740025  | 1.267671  | 1.052785  |
| H | 6.742210  | 1.260617  | 1.486267  |
| O | 1.608355  | -0.441721 | 2.344800  |
| C | 2.796231  | -0.684339 | 2.418552  |
| H | 3.463328  | -0.728187 | 1.531867  |
| H | 3.257142  | -0.891001 | 3.408367  |
| O | -1.180585 | -0.512391 | 2.573820  |
| O | -0.368785 | 1.509818  | 2.416336  |
| C | -1.003328 | 0.636112  | 3.083545  |
| C | -1.536159 | 0.970968  | 4.434214  |
| H | -0.705730 | 1.205524  | 5.112553  |
| H | -2.154226 | 1.876384  | 4.374288  |
| H | -2.121670 | 0.146315  | 4.851975  |

### XIII

|    |           |           |           |
|----|-----------|-----------|-----------|
| H  | 2.818437  | 6.339580  | -1.098963 |
| H  | 4.134156  | 4.669143  | -2.396343 |
| C  | 2.604129  | 5.273992  | -0.993362 |
| C  | 3.340499  | 4.338033  | -1.723302 |
| H  | 1.023667  | 5.567386  | 0.451672  |
| C  | 1.602994  | 4.843683  | -0.126722 |
| C  | 3.071047  | 2.979627  | -1.589902 |
| H  | 3.668726  | 2.255497  | -2.152996 |
| H  | 5.986450  | -1.606474 | -1.781313 |
| H  | 7.006914  | -1.175212 | 0.449169  |
| H  | -2.967254 | 6.442269  | 1.535745  |
| H  | -2.485348 | 6.109162  | -0.884028 |
| C  | 1.331588  | 3.480853  | 0.008884  |
| C  | 5.427594  | -1.060917 | -1.018023 |
| C  | 5.998538  | -0.818546 | 0.229143  |
| C  | 2.054368  | 2.537377  | -0.727399 |
| H  | 3.715146  | -0.822349 | -2.284344 |
| C  | -2.685263 | 5.454856  | 1.164421  |
| C  | 4.137814  | -0.610714 | -1.299930 |
| C  | -2.414360 | 5.268805  | -0.190144 |
| H  | 0.547602  | 3.157612  | 0.694307  |
| C  | 5.281398  | -0.108373 | 1.193435  |
| H  | 5.728063  | 0.094279  | 2.169314  |
| H  | -2.824663 | 4.512236  | 3.103578  |
| C  | -2.603926 | 4.374064  | 2.043003  |
| C  | 3.406565  | 0.092287  | -0.334707 |
| H  | 1.851679  | 0.946305  | -3.010490 |
| C  | 3.997166  | 0.345669  | 0.912171  |
| C  | -2.054976 | 4.009348  | -0.668192 |
| H  | -1.849533 | 3.888903  | -1.734375 |
| H  | -0.288530 | 2.334144  | -2.085046 |
| H  | 3.440144  | 0.901836  | 1.670010  |
| H  | 0.031855  | 1.314200  | -4.578794 |
| P  | 1.714360  | 0.732263  | -0.601098 |
| C  | -2.243529 | 3.115287  | 1.569256  |
| C  | 1.309020  | 0.262500  | -2.337901 |
| C  | -1.960240 | 2.921659  | 0.209661  |
| H  | -2.176696 | 2.273893  | 2.264616  |
| H  | 1.719640  | -0.744000 | -2.520208 |
| H  | 0.286609  | -0.437740 | -4.710700 |
| C  | -0.948485 | 1.450775  | -2.081273 |
| C  | -0.314431 | 0.336771  | -4.212978 |
| H  | -1.799023 | 1.727585  | -2.721664 |
| C  | -0.193619 | 0.241525  | -2.691083 |
| H  | -1.357229 | 0.208226  | -4.538824 |
| P  | -1.519742 | 1.232263  | -0.345341 |
| Ru | 0.041115  | 0.055622  | 0.891945  |
| H  | -3.489232 | 0.776303  | -2.612794 |
| H  | 3.951776  | -3.959536 | 0.107097  |
| H  | 2.302790  | -2.163629 | 0.539143  |
| C  | 2.984787  | -3.983213 | -0.401824 |
| C  | 2.060735  | -2.962910 | -0.162909 |
| C  | -0.821611 | -1.097766 | -2.256683 |
| C  | -3.922631 | 0.415984  | -1.676827 |
| H  | -0.496281 | -1.892544 | -2.946347 |
| C  | -3.204741 | 0.483490  | -0.474818 |
| H  | 3.401277  | -5.818638 | -1.459244 |
| C  | 2.678111  | -5.020746 | -1.277144 |
| H  | -1.912579 | -1.024496 | -2.364884 |
| P  | -0.445817 | -1.670113 | -0.531210 |
| C  | 0.819750  | -2.975781 | -0.808033 |
| H  | -5.749092 | -0.166219 | -2.659126 |
| C  | -5.210495 | -0.119121 | -1.710140 |
| C  | 1.436082  | -5.045444 | -1.916390 |
| C  | 0.511827  | -4.033235 | -1.681557 |
| C  | -3.824103 | 0.019600  | 0.694758  |
| H  | 1.183587  | -5.863226 | -2.594625 |
| H  | -3.298572 | 0.061423  | 1.652712  |
| H  | -0.466678 | -4.079063 | -2.170847 |
| C  | -5.809190 | -0.581585 | -0.540738 |
| C  | -1.908869 | -2.667573 | -0.055010 |

|   |           |           |           |
|---|-----------|-----------|-----------|
| C | -5.112891 | -0.505050 | 0.664598  |
| H | -1.149885 | -2.929049 | 1.965259  |
| H | -2.944007 | -2.642329 | -1.971644 |
| H | -6.817776 | -0.999332 | -0.567804 |
| C | -1.953885 | -3.157728 | 1.259250  |
| C | -2.948530 | -2.991285 | -0.936710 |
| H | -5.570612 | -0.864352 | 1.588690  |
| C | -3.026463 | -3.936664 | 1.684772  |
| C | -4.020895 | -3.771218 | -0.504915 |
| H | -3.046564 | -4.308507 | 2.711254  |
| H | -4.827340 | -4.008629 | -1.202531 |
| C | -4.065942 | -4.241109 | 0.805651  |
| H | -4.907938 | -4.850590 | 1.140732  |
| O | 0.386797  | 1.673560  | 2.409669  |
| C | 1.094472  | 1.729932  | 3.393072  |
| H | 1.027189  | 2.602133  | 4.075935  |
| H | 1.826591  | 0.932387  | 3.640772  |
| O | 0.068107  | -1.673031 | 3.550577  |
| O | 1.558501  | -0.903540 | 2.070277  |
| C | 1.224579  | -1.586798 | 3.112167  |
| H | -1.381739 | -0.339470 | 1.889736  |
| H | -0.802549 | -0.762288 | 2.373357  |
| C | 2.356041  | -2.319315 | 3.776096  |
| H | 3.298038  | -1.763157 | 3.694227  |
| H | 2.127188  | -2.544103 | 4.822817  |
| H | 2.503078  | -3.275199 | 3.252449  |

### XIII-XIV

|    |           |           |           |
|----|-----------|-----------|-----------|
| H  | 3.653172  | 5.933820  | -1.130887 |
| H  | 4.805330  | 4.081153  | -2.332837 |
| C  | 3.299140  | 4.906717  | -1.019892 |
| C  | 3.944300  | 3.868583  | -1.695631 |
| H  | 1.696985  | 5.431258  | 0.332941  |
| C  | 2.208032  | 4.626687  | -0.201343 |
| C  | 3.496666  | 2.558571  | -1.554759 |
| H  | 4.021345  | 1.752296  | -2.077489 |
| H  | 5.783449  | -2.306297 | -1.764798 |
| H  | 6.794299  | -2.063630 | 0.497935  |
| H  | -2.236549 | 6.701450  | 1.569344  |
| H  | -1.725578 | 6.351092  | -0.841898 |
| C  | 1.758767  | 3.312524  | -0.058216 |
| C  | 5.278103  | -1.714382 | -0.998647 |
| C  | 5.843882  | -1.578030 | 0.266917  |
| C  | 2.391525  | 2.267428  | -0.738389 |
| H  | 3.642208  | -1.226547 | -2.295983 |
| C  | -2.063782 | 5.693218  | 1.187175  |
| C  | 4.062616  | -1.097757 | -1.296195 |
| C  | -1.776677 | 5.497386  | -0.162644 |
| H  | 0.904325  | 3.106617  | 0.587835  |
| C  | 5.195767  | -0.810067 | 1.235703  |
| H  | 5.639213  | -0.690267 | 2.226710  |
| H  | -2.374756 | 4.743665  | 3.102948  |
| C  | -2.139406 | 4.596608  | 2.046644  |
| C  | 3.399920  | -0.333195 | -0.328146 |
| H  | 1.976399  | 0.735113  | -3.015696 |
| C  | 3.985648  | -0.191572 | 0.938529  |
| C  | -1.556285 | 4.211428  | -0.654714 |
| H  | -1.332562 | 4.084026  | -1.716484 |
| H  | 0.005807  | 2.349752  | -2.082318 |
| H  | 3.481855  | 0.407443  | 1.701405  |
| H  | 0.214007  | 1.303770  | -4.589701 |
| P  | 1.805253  | 0.524268  | -0.603899 |
| C  | -1.919079 | 3.311332  | 1.558872  |
| C  | 1.358631  | 0.112911  | -2.347853 |
| C  | -1.619311 | 3.106591  | 0.204305  |
| H  | -1.975834 | 2.455362  | 2.237484  |
| H  | 1.652857  | -0.932584 | -2.536818 |
| H  | 0.266387  | -0.465652 | -4.722474 |
| C  | -0.753022 | 1.549765  | -2.093249 |
| C  | -0.243030 | 0.372404  | -4.225281 |
| H  | -1.557493 | 1.926680  | -2.742075 |
| C  | -0.136465 | 0.263719  | -2.703302 |
| H  | -1.293121 | 0.364702  | -4.553156 |
| P  | -1.362395 | 1.384048  | -0.364240 |
| Ru | 0.040208  | 0.071667  | 0.879207  |
| H  | -3.373779 | 1.250777  | -2.632562 |
| H  | 3.452436  | -4.368010 | 0.255869  |
| H  | 1.995302  | -2.403387 | 0.634156  |
| C  | 2.513670  | -4.279467 | -0.296509 |
| C  | 1.696786  | -3.166032 | -0.085817 |
| C  | -0.914217 | -0.994820 | -2.270864 |
| C  | -3.840492 | 0.890416  | -1.712690 |
| H  | -0.673295 | -1.823633 | -2.954984 |
| C  | -3.116802 | 0.821383  | -0.513777 |
| H  | 2.777292  | -6.136094 | -1.365980 |
| C  | 2.137698  | -5.265876 | -1.203442 |
| H  | -1.988879 | -0.798631 | -2.391356 |
| P  | -0.627027 | -1.594758 | -0.536787 |
| C  | 0.495087  | -3.032281 | -0.788743 |
| H  | -5.720921 | 0.553020  | -2.707891 |
| C  | -5.177399 | 0.495777  | -1.762265 |
| C  | 0.932720  | -5.145542 | -1.900142 |
| C  | 0.115014  | -4.040121 | -1.691536 |
| C  | -3.776167 | 0.364027  | 0.636178  |
| H  | 0.625186  | -5.922352 | -2.603396 |
| H  | -3.235795 | 0.290158  | 1.583206  |
| H  | -0.838123 | -3.973351 | -2.226178 |
| C  | -5.818192 | 0.041280  | -0.611790 |
| C  | -2.195649 | -2.443018 | -0.099319 |

|   |           |           |           |
|---|-----------|-----------|-----------|
| C | -5.113607 | -0.018779 | 0.589552  |
| H | -1.521053 | -2.769900 | 1.936629  |
| H | -3.172370 | -2.326728 | -2.042092 |
| H | -6.865504 | -0.265738 | -0.651583 |
| C | -2.327094 | -2.919346 | 1.213367  |
| C | -3.239693 | -2.665709 | -1.006180 |
| H | -5.603506 | -0.377522 | 1.497407  |
| C | -3.482846 | -3.582689 | 1.614960  |
| C | -4.397888 | -3.328187 | -0.600125 |
| H | -3.567829 | -3.945146 | 2.641537  |
| H | -5.206180 | -3.485402 | -1.317944 |
| C | -4.525788 | -3.782902 | 0.710088  |
| H | -5.434712 | -4.299658 | 1.025411  |
| O | 0.564652  | 1.665976  | 2.341641  |
| C | 1.301285  | 1.736055  | 3.302594  |
| H | 1.322969  | 2.655571  | 3.923159  |
| H | 1.975076  | 0.901472  | 3.595100  |
| O | -0.326673 | -1.412673 | 3.605635  |
| O | 1.362866  | -1.082168 | 2.193809  |
| C | 0.874929  | -1.587703 | 3.246193  |
| H | -1.328077 | -0.231097 | 1.933470  |
| H | -0.856760 | -0.719900 | 2.630283  |
| C | 1.754660  | -2.455455 | 4.086252  |
| H | 2.809026  | -2.180866 | 3.969930  |
| H | 1.456721  | -2.430722 | 5.139506  |
| H | 1.645919  | -3.493159 | 3.739187  |

# XIV

|    |           |           |           |
|----|-----------|-----------|-----------|
| H  | 4.164300  | 5.623807  | -1.115228 |
| H  | 5.145750  | 3.694149  | -2.347253 |
| C  | 3.726651  | 4.628712  | -1.010599 |
| C  | 4.276347  | 3.547408  | -1.702761 |
| H  | 2.185554  | 5.271749  | 0.361467  |
| C  | 2.622903  | 4.432299  | -0.184530 |
| C  | 3.721978  | 2.277851  | -1.569586 |
| H  | 4.171723  | 1.436213  | -2.106347 |
| H  | 5.617508  | -2.720485 | -1.856461 |
| H  | 6.634721  | -2.637470 | 0.414838  |
| H  | -1.607459 | 6.840727  | 1.667099  |
| H  | -1.121546 | 6.477093  | -0.747405 |
| C  | 2.067284  | 3.158546  | -0.049235 |
| C  | 5.159093  | -2.114212 | -1.072126 |
| C  | 5.728871  | -2.067353 | 0.198274  |
| C  | 2.604735  | 2.070487  | -0.744632 |
| H  | 3.576312  | -1.446218 | -2.356425 |
| C  | -1.532764 | 5.826042  | 1.270362  |
| C  | 4.000843  | -1.388368 | -1.351617 |
| C  | -1.259467 | 5.622698  | -0.081151 |
| H  | 1.201744  | 3.017156  | 0.600633  |
| C  | 5.142458  | -1.279407 | 1.190120  |
| H  | 5.591311  | -1.227509 | 2.184760  |
| H  | -1.946990 | 4.883984  | 3.170132  |
| C  | -1.720880 | 4.729522  | 2.112755  |
| C  | 3.398548  | -0.602570 | -0.361201 |
| H  | 2.041144  | 0.576975  | -3.022536 |
| C  | 3.988714  | -0.553149 | 0.910695  |
| C  | -1.163439 | 4.328452  | -0.591331 |
| H  | -0.947629 | 4.195146  | -1.654023 |
| H  | 0.218220  | 2.354301  | -2.039599 |
| H  | 3.534344  | 0.064092  | 1.690832  |
| H  | 0.335873  | 1.326691  | -4.567784 |
| P  | 1.870697  | 0.382833  | -0.603254 |
| C  | -1.625431 | 3.435979  | 1.606807  |
| C  | 1.376525  | 0.014874  | -2.346027 |
| C  | -1.338468 | 3.222639  | 0.250676  |
| H  | -1.768696 | 2.577865  | 2.269851  |
| H  | 1.574692  | -1.053474 | -2.534256 |
| H  | 0.232518  | -0.438703 | -4.722280 |
| C  | -0.608152 | 1.624778  | -2.066386 |
| C  | -0.201039 | 0.434651  | -4.213862 |
| H  | -1.371320 | 2.080073  | -2.715043 |
| C  | -0.102493 | 0.298088  | -2.693293 |
| H  | -1.248003 | 0.523218  | -4.540066 |
| P  | -1.241471 | 1.490989  | -0.341060 |
| Ru | 0.023068  | 0.067323  | 0.886525  |
| H  | -3.250973 | 1.603027  | -2.614661 |
| H  | 3.096620  | -4.576172 | 0.168498  |
| H  | 1.815146  | -2.495064 | 0.536621  |
| C  | 2.139617  | -4.435584 | -0.340275 |
| C  | 1.418764  | -3.256938 | -0.134405 |
| C  | -0.991205 | -0.890527 | -2.277788 |
| C  | -3.751206 | 1.264716  | -1.704043 |
| H  | -0.817029 | -1.736689 | -2.961540 |
| C  | -3.039874 | 1.097650  | -0.507415 |
| H  | 2.207670  | -6.342902 | -1.349814 |
| C  | 1.644569  | -5.420926 | -1.189608 |
| H  | -2.041859 | -0.596684 | -2.413080 |
| P  | -0.790837 | -1.514825 | -0.538555 |
| C  | 0.195351  | -3.054105 | -0.780378 |
| H  | -5.653402 | 1.130619  | -2.706488 |
| C  | -5.119333 | 0.999018  | -1.762855 |
| C  | 0.419261  | -5.230467 | -1.832973 |
| C  | -0.302114 | -4.058912 | -1.627288 |
| C  | -3.740442 | 0.674406  | 0.631171  |
| H  | 0.020236  | -6.003654 | -2.493011 |
| H  | -3.201539 | 0.519057  | 1.569423  |
| H  | -1.271780 | -3.932810 | -2.119950 |
| C  | -5.802159 | 0.579137  | -0.623393 |
| C  | -2.438560 | -2.232775 | -0.148654 |

|   |           |           |           |
|---|-----------|-----------|-----------|
| C | -5.108083 | 0.422101  | 0.575464  |
| H | -1.814418 | -2.682578 | 1.874525  |
| H | -3.384352 | -1.967907 | -2.091151 |
| H | -6.873875 | 0.373894  | -0.670133 |
| C | -2.628133 | -2.736291 | 1.146212  |
| C | -3.490226 | -2.332725 | -1.067425 |
| H | -5.631814 | 0.087254  | 1.473666  |
| C | -3.841059 | -3.305617 | 1.520918  |
| C | -4.708498 | -2.898134 | -0.689681 |
| H | -3.968022 | -3.692571 | 2.534248  |
| H | -5.521453 | -2.956504 | -1.417026 |
| C | -4.889984 | -3.380919 | 0.603708  |
| H | -5.845167 | -3.821871 | 0.896579  |
| O | 0.692963  | 1.577972  | 2.345079  |
| C | 1.457171  | 1.652764  | 3.284735  |
| H | 1.544506  | 2.595386  | 3.863197  |
| H | 2.095382  | 0.798230  | 3.601815  |
| O | -0.424857 | -1.551163 | 3.693747  |
| O | 1.242110  | -1.240081 | 2.245031  |
| C | 0.791281  | -1.768953 | 3.268341  |
| H | -1.311687 | -0.157553 | 1.878870  |
| H | -0.865257 | -0.944564 | 3.003272  |
| C | 1.593893  | -2.719267 | 4.079401  |
| H | 2.662869  | -2.583485 | 3.888572  |
| H | 1.368573  | -2.628275 | 5.147359  |
| H | 1.323888  | -3.742276 | 3.779686  |

**Xa**

|    |           |           |           |
|----|-----------|-----------|-----------|
| H  | -6.755450 | -1.714056 | -0.728493 |
| H  | -5.532083 | -1.261462 | -2.850685 |
| C  | -5.781252 | -1.221154 | -0.706003 |
| C  | -5.096076 | -0.969861 | -1.892621 |
| H  | -5.759586 | -1.001841 | 1.443209  |
| C  | -5.222163 | -0.824258 | 0.509103  |
| C  | -3.853483 | -0.335143 | -1.866402 |
| H  | -3.347096 | -0.153199 | -2.817442 |
| H  | -2.853221 | 5.708271  | -0.741225 |
| H  | -2.988567 | 5.950700  | 1.731053  |
| H  | -3.449025 | -5.777263 | 1.554338  |
| H  | -4.252873 | -4.367865 | -0.337766 |
| C  | -3.982080 | -0.191813 | 0.537317  |
| C  | -2.655994 | 4.849643  | -0.095634 |
| C  | -2.731406 | 4.985226  | 1.290072  |
| C  | -3.273533 | 0.053391  | -0.650524 |
| H  | -2.293063 | 3.529390  | -1.753781 |
| C  | -2.791699 | -5.025928 | 1.112009  |
| C  | -2.335021 | 3.618134  | -0.664949 |
| C  | -3.241714 | -4.238099 | 0.054310  |
| H  | -3.560770 | 0.121055  | 1.495610  |
| C  | -2.480651 | 3.886036  | 2.111528  |
| H  | -2.539969 | 3.987798  | 3.197375  |
| H  | -1.132455 | -5.475172 | 2.423815  |
| C  | -1.494773 | -4.856014 | 1.600652  |
| C  | -2.073302 | 2.512780  | 0.152975  |
| H  | -1.952552 | 1.198930  | -2.908972 |
| C  | -2.146750 | 2.657759  | 1.546664  |
| C  | -2.405938 | -3.275515 | -0.513177 |
| H  | -2.790077 | -2.665288 | -1.332659 |
| H  | -1.505746 | -1.503422 | -2.453376 |
| H  | -1.928278 | 1.800130  | 2.194326  |
| H  | -1.038456 | -0.204239 | -4.680791 |
| P  | -1.626574 | 0.864521  | -0.502475 |
| C  | -0.655460 | -3.900834 | 1.034149  |
| C  | -1.083209 | 1.142878  | -2.237848 |
| C  | -1.102473 | -3.097319 | -0.031007 |
| H  | 0.362390  | -3.779434 | 1.418497  |
| H  | -0.623902 | 2.143541  | -2.275077 |
| H  | 0.088399  | 1.166541  | -4.652211 |
| C  | -0.425623 | -1.339177 | -2.317016 |
| C  | -0.074407 | 0.144003  | -4.281520 |
| H  | 0.075380  | -2.059658 | -2.982180 |
| C  | -0.059996 | 0.102541  | -2.753712 |
| H  | 0.712184  | -0.494834 | -4.708277 |
| P  | 0.016356  | -1.756321 | -0.573448 |
| Ru | -0.013365 | -0.052910 | 0.835362  |
| H  | 1.088093  | -3.848483 | -2.395708 |
| H  | 0.637678  | 5.136679  | 1.922378  |
| H  | 0.868556  | 2.682054  | 1.665523  |
| C  | 0.886132  | 4.716060  | 0.945515  |
| C  | 1.020558  | 3.337950  | 0.799751  |
| C  | 1.365580  | 0.458833  | -2.277915 |
| C  | 1.868680  | -3.584469 | -1.675699 |
| H  | 1.796659  | 1.245289  | -2.916866 |
| C  | 1.636378  | -2.608767 | -0.693042 |
| H  | 0.943831  | 6.633756  | -0.046401 |
| C  | 1.056433  | 5.553075  | -0.156708 |
| H  | 2.011635  | -0.422267 | -2.419967 |
| P  | 1.530506  | 0.954996  | -0.510497 |
| C  | 1.336699  | 2.779004  | -0.447411 |
| H  | 3.266757  | -5.000956 | -2.499176 |
| C  | 3.092472  | -4.245678 | -1.729912 |
| C  | 1.372967  | 5.008070  | -1.400404 |
| C  | 1.520896  | 3.629048  | -1.545104 |
| C  | 2.635868  | -2.329926 | 0.246245  |
| H  | 1.514860  | 5.660535  | -2.264612 |
| H  | 2.457790  | -1.569278 | 1.012066  |
| H  | 1.786055  | 3.227580  | -2.526989 |
| C  | 4.090346  | -3.951314 | -0.797756 |
| C  | 3.320085  | 0.766414  | -0.163647 |



|   |           |           |           |
|---|-----------|-----------|-----------|
| C | 3.858362  | -3.000456 | 0.192897  |
| H | 3.058606  | 1.431079  | 1.880173  |
| H | 3.938739  | 0.067563  | -2.131749 |
| H | 5.049088  | -4.472252 | -0.844251 |
| C | 3.770818  | 1.094385  | 1.125054  |
| C | 4.247941  | 0.326174  | -1.117075 |
| H | 4.634416  | -2.765143 | 0.924915  |
| C | 5.117978  | 0.967235  | 1.451900  |
| C | 5.596969  | 0.206285  | -0.785544 |
| H | 5.455614  | 1.222897  | 2.458647  |
| H | 6.308617  | -0.134944 | -1.540463 |
| C | 6.034450  | 0.520513  | 0.499180  |
| H | 7.091361  | 0.424722  | 0.757007  |
| O | 1.297405  | -0.121208 | 2.416551  |
| C | 1.408303  | -1.015234 | 3.419199  |
| H | 1.571675  | -2.054187 | 3.059970  |
| O | 0.226790  | -1.135034 | 4.245797  |
| H | -0.979642 | -1.100127 | 3.126079  |
| H | 2.255955  | -0.757389 | 4.086971  |
| O | -1.497450 | -0.886620 | 2.299603  |
| H | 0.184989  | -0.355579 | 4.815309  |
| H | -1.932206 | -1.704043 | 2.019302  |

## Xa-Xla

|    |           |           |           |
|----|-----------|-----------|-----------|
| H  | -6.485404 | 2.250698  | -0.668569 |
| H  | -5.239234 | 1.871298  | -2.791207 |
| C  | -5.399118 | 2.140355  | -0.655306 |
| C  | -4.702448 | 1.924549  | -1.841264 |
| H  | -5.233067 | 2.428931  | 1.479711  |
| C  | -4.698349 | 2.235677  | 0.547315  |
| C  | -3.314491 | 1.781232  | -1.826332 |
| H  | -2.801929 | 1.617450  | -2.777612 |
| H  | 0.956005  | 6.313024  | -0.751310 |
| H  | 0.948410  | 6.614135  | 1.718270  |
| H  | -6.338825 | -2.311688 | 1.264423  |
| H  | -5.979688 | -1.401364 | -1.025944 |
| C  | -3.312845 | 2.101813  | 0.562856  |
| C  | 0.623170  | 5.500406  | -0.101831 |
| C  | 0.618615  | 5.668547  | 1.282454  |
| C  | -2.599911 | 1.855236  | -0.623240 |
| H  | 0.198417  | 4.190043  | -1.752768 |
| C  | -5.325438 | -2.154177 | 0.889473  |
| C  | 0.198387  | 4.298008  | -0.664968 |
| C  | -5.124986 | -1.643467 | -0.390298 |
| H  | -2.773339 | 2.215354  | 1.506920  |
| C  | 0.189920  | 4.629588  | 2.108631  |
| H  | 0.183285  | 4.758645  | 3.193216  |
| H  | -4.371215 | -2.887394 | 2.688224  |
| C  | -4.225471 | -2.475343 | 1.687518  |
| C  | -0.224757 | 3.248696  | 0.159584  |
| H  | -0.870673 | 2.061918  | -2.892794 |
| C  | -0.224094 | 3.421422  | 1.552779  |
| C  | -3.831569 | -1.435415 | -0.871407 |
| H  | -3.711354 | -1.037946 | -1.880651 |
| H  | -1.987030 | -0.418514 | -2.499952 |
| H  | -0.543418 | 2.596303  | 2.201171  |
| H  | -0.885806 | 0.401426  | -4.664314 |
| P  | -0.777516 | 1.632880  | -0.488531 |
| C  | -2.936169 | -2.271957 | 1.208467  |
| C  | -0.172711 | 1.537777  | -2.223221 |
| C  | -2.721821 | -1.737522 | -0.073595 |
| H  | -2.082521 | -2.523078 | 1.844225  |
| H  | 0.763027  | 2.117520  | -2.267693 |
| H  | 0.817010  | 0.900826  | -4.637280 |
| C  | -1.009456 | -0.881266 | -2.303320 |
| C  | 0.107611  | 0.146861  | -4.266154 |
| H  | -0.966741 | -1.784193 | -2.933312 |
| C  | 0.100084  | 0.102343  | -2.737950 |
| H  | 0.398311  | -0.823401 | -4.693747 |
| P  | -0.975660 | -1.432158 | -0.535552 |
| Ru | 0.011929  | -0.022898 | 0.850881  |
| H  | -1.826520 | -3.853010 | -1.966722 |
| H  | 3.477014  | 3.896456  | 1.912844  |
| H  | 2.284762  | 1.742062  | 1.661648  |
| C  | 3.455854  | 3.400947  | 0.939774  |
| C  | 2.791160  | 2.186185  | 0.795415  |
| C  | 1.480159  | -0.405045 | -2.267708 |
| C  | -0.919343 | -4.101870 | -1.406259 |
| H  | 2.277228  | -0.000819 | -2.911163 |
| C  | -0.287908 | -3.130885 | -0.612304 |
| H  | 4.594877  | 4.943831  | -0.053681 |
| C  | 4.079726  | 3.986881  | -0.161208 |
| H  | 1.514552  | -1.498561 | -2.404904 |
| P  | 1.873987  | -0.082884 | -0.499207 |
| C  | 2.749791  | 1.533411  | -0.445437 |
| H  | -0.901573 | -6.143167 | -2.092373 |
| C  | -0.405292 | -5.393165 | -1.472907 |
| C  | 4.046294  | 3.347481  | -1.399667 |
| C  | 3.392873  | 2.123382  | -1.540518 |
| C  | 0.846968  | -3.480770 | 0.125162  |
| H  | 4.539751  | 3.799220  | -2.262914 |
| H  | 1.331880  | -2.731948 | 0.754624  |
| H  | 3.396029  | 1.634139  | -2.518450 |
| C  | 0.737843  | -5.731307 | -0.744135 |
| C  | 3.262510  | -1.231326 | -0.145499 |

|   |           |           |           |
|---|-----------|-----------|-----------|
| C | 1.360330  | -4.777021 | 0.056577  |
| H | 3.335939  | -0.608472 | 1.928288  |
| H | 3.479951  | -2.067347 | -2.142830 |
| H | 1.137808  | -6.745998 | -0.798837 |
| C | 3.773413  | -1.252036 | 1.161549  |
| C | 3.840548  | -2.064261 | -1.112295 |
| H | 2.251834  | -5.036088 | 0.632673  |
| C | 4.827949  | -2.097947 | 1.494142  |
| C | 4.898155  | -2.909031 | -0.775262 |
| H | 5.215746  | -2.103278 | 2.515134  |
| H | 5.339793  | -3.550734 | -1.540715 |
| C | 5.390946  | -2.932088 | 0.527453  |
| H | 6.218985  | -3.594286 | 0.788893  |
| O | 0.963024  | -1.053859 | 2.487299  |
| C | 0.528086  | -1.991583 | 3.201850  |
| H | -0.007578 | -2.845435 | 2.741542  |
| O | -1.001377 | -1.434984 | 4.091314  |
| H | -1.299208 | -0.687615 | 3.383832  |
| H | 1.093795  | -2.266478 | 4.111346  |
| O | -1.448642 | 0.242020  | 2.333400  |
| H | -0.718627 | -0.942271 | 4.873755  |
| H | -2.357043 | 0.284439  | 2.009964  |

## XIa

|    |           |           |           |
|----|-----------|-----------|-----------|
| H  | -2.285247 | 6.591626  | 0.353139  |
| H  | -3.677345 | 5.182033  | 1.860656  |
| C  | -2.163355 | 5.506454  | 0.352281  |
| C  | -2.941564 | 4.716671  | 1.201439  |
| H  | -0.630359 | 5.515532  | -1.171540 |
| C  | -1.240297 | 4.906661  | -0.500411 |
| C  | -2.788909 | 3.333265  | 1.204985  |
| H  | -3.426858 | 2.730465  | 1.858701  |
| H  | -6.430281 | -0.595882 | 0.642378  |
| H  | -6.729805 | -0.680058 | -1.826609 |
| H  | 3.244515  | 6.161724  | -1.017475 |
| H  | 2.746548  | 5.700602  | 1.378477  |
| C  | -1.085706 | 3.520215  | -0.495700 |
| C  | -5.600419 | -0.337887 | -0.019268 |
| C  | -5.767734 | -0.384615 | -1.402402 |
| C  | -1.845878 | 2.721023  | 0.364230  |
| H  | -4.271180 | 0.075690  | 1.615644  |
| C  | 2.885698  | 5.176480  | -0.712174 |
| C  | -4.375045 | 0.040479  | 0.528101  |
| C  | 2.605831  | 4.919565  | 0.628306  |
| H  | -0.352423 | 3.052449  | -1.154753 |
| C  | -4.705066 | -0.049980 | -2.242316 |
| H  | -4.831122 | -0.083122 | -3.326730 |
| H  | 2.939068  | 4.360085  | -2.711640 |
| C  | 2.713028  | 4.167445  | -1.660441 |
| C  | -3.301740 | 0.368384  | -0.310164 |
| H  | -2.167013 | 1.196743  | 2.679654  |
| C  | -3.477293 | 0.321754  | -1.701190 |
| C  | 2.148335  | 3.662197  | 1.021154  |
| H  | 1.948697  | 3.485769  | 2.080453  |
| H  | 0.246313  | 2.167951  | 2.268111  |
| H  | -2.634016 | 0.554906  | -2.360711 |
| H  | -0.646127 | 1.257238  | 4.549079  |
| P  | -1.664161 | 0.892750  | 0.318313  |
| C  | 2.251855  | 2.910752  | -1.275658 |
| C  | -1.668971 | 0.401069  | 2.104205  |
| C  | 1.956895  | 2.650819  | 0.070665  |
| H  | 2.107351  | 2.134313  | -2.033246 |
| H  | -2.299110 | -0.496770 | 2.206926  |
| H  | -1.203608 | -0.426484 | 4.622898  |
| C  | 0.737771  | 1.180643  | 2.252250  |
| C  | -0.407397 | 0.228977  | 4.241281  |
| H  | 1.570352  | 1.256200  | 2.967972  |
| C  | -0.280154 | 0.118517  | 2.721746  |
| H  | 0.528404  | -0.060708 | 4.741589  |
| P  | 1.409308  | 0.964087  | 0.550381  |
| Ru | 0.014004  | -0.048443 | -0.859522 |
| H  | 3.185415  | 0.108466  | 2.906971  |
| H  | -4.036354 | -3.292821 | -1.833262 |
| H  | -1.853808 | -2.157001 | -1.560774 |
| C  | -3.547719 | -3.289084 | -0.856490 |
| C  | -2.318274 | -2.654019 | -0.699993 |
| C  | 0.194996  | -1.314948 | 2.391086  |
| C  | 3.671146  | -0.125508 | 1.955869  |
| H  | -0.308569 | -2.040374 | 3.047796  |
| C  | 3.047014  | 0.158233  | 0.735124  |
| H  | -5.125558 | -4.392399 | 0.121773  |
| C  | -4.155964 | -3.903263 | 0.237478  |
| H  | 1.267459  | -1.406059 | 2.625227  |
| P  | -0.041979 | -1.790693 | 0.630548  |
| C  | -1.671157 | -2.636459 | 0.545139  |
| H  | 5.410078  | -0.937495 | 2.938316  |
| C  | 4.933094  | -0.721601 | 1.979732  |
| C  | -3.522487 | -3.894848 | 1.479792  |
| C  | -2.282902 | -3.274501 | 1.631837  |
| C  | 3.721167  | -0.137622 | -0.459693 |
| H  | -3.991315 | -4.382870 | 2.336931  |
| H  | 3.264085  | 0.127077  | -1.420923 |
| H  | -1.797860 | -3.301203 | 2.611053  |
| C  | 5.585072  | -1.033136 | 0.788190  |
| C  | 1.138094  | -3.157404 | 0.303298  |

|   |           |           |           |
|---|-----------|-----------|-----------|
| C | 4.978864  | -0.732970 | -0.432796 |
| H | -0.184541 | -4.108644 | -1.130433 |
| H | 2.708435  | -2.484257 | 1.645783  |
| H | 6.573269  | -1.497385 | 0.810463  |
| C | 0.801224  | -4.123673 | -0.658546 |
| C | 2.408642  | -3.212520 | 0.891241  |
| H | 5.494888  | -0.954268 | -1.370112 |
| C | 1.713687  | -5.109582 | -1.024971 |
| C | 3.320330  | -4.201200 | 0.523189  |
| H | 1.430008  | -5.857085 | -1.769146 |
| H | 4.303269  | -4.227290 | 0.999228  |
| C | 2.979012  | -5.149468 | -0.438677 |
| H | 3.692807  | -5.924952 | -0.724246 |
| O | 0.902245  | -1.434703 | -2.327599 |
| C | 1.891788  | -1.771582 | -2.943676 |
| H | 2.920464  | -1.584819 | -2.576128 |
| O | 2.201713  | 0.520065  | -3.779383 |
| H | 1.272403  | 0.753147  | -3.523503 |
| H | 1.796377  | -2.363219 | -3.877766 |
| O | -0.206415 | 0.969793  | -2.617550 |
| H | 2.356882  | 0.971212  | -4.615653 |
| H | -0.681676 | 1.807635  | -2.646291 |

## XIIa

|    |           |           |           |
|----|-----------|-----------|-----------|
| H  | -2.858430 | 6.329937  | 0.301213  |
| H  | -4.007560 | 4.829654  | 1.922024  |
| C  | -2.644031 | 5.259204  | 0.300518  |
| C  | -3.285511 | 4.418993  | 1.213132  |
| H  | -1.240111 | 5.374343  | -1.338973 |
| C  | -1.740395 | 4.726798  | -0.615406 |
| C  | -3.014238 | 3.053907  | 1.217582  |
| H  | -3.547478 | 2.409285  | 1.923100  |
| H  | -6.296061 | -1.186789 | 1.076891  |
| H  | -6.825179 | -1.365174 | -1.349131 |
| H  | 2.632619  | 6.353836  | -1.511554 |
| H  | 2.601946  | 5.900691  | 0.935369  |
| C  | -1.466526 | 3.358818  | -0.611148 |
| C  | -5.560446 | -0.877888 | 0.331033  |
| C  | -5.856480 | -0.977139 | -1.027075 |
| C  | -2.087287 | 2.511945  | 0.313258  |
| H  | -4.126854 | -0.303620 | 1.819043  |
| C  | 2.387373  | 5.355170  | -1.143906 |
| C  | -4.326361 | -0.379478 | 0.747422  |
| C  | 2.369919  | 5.102356  | 0.227311  |
| H  | -0.755729 | 2.943654  | -1.328282 |
| C  | -4.911621 | -0.577329 | -1.972193 |
| H  | -5.134998 | -0.653435 | -3.038611 |
| H  | 2.102518  | 4.525813  | -3.119222 |
| C  | 2.092065  | 4.331276  | -2.044589 |
| C  | -3.368469 | 0.014858  | -0.196454 |
| H  | -2.125764 | 1.000605  | 2.663203  |
| C  | -3.674258 | -0.089915 | -1.560978 |
| C  | 2.061389  | 3.827987  | 0.700463  |
| H  | 2.068372  | 3.644722  | 1.778440  |
| H  | 0.130870  | 2.228803  | 2.079857  |
| H  | -2.920915 | 0.177929  | -2.307566 |
| H  | -0.519527 | 1.219103  | 4.459743  |
| P  | -1.738040 | 0.707991  | 0.280291  |
| C  | 1.772064  | 3.058616  | -1.576415 |
| C  | -1.575834 | 0.254213  | 2.069224  |
| C  | 1.751680  | 2.799702  | -0.198991 |
| H  | 1.494217  | 2.267586  | -2.282835 |
| H  | -2.094938 | -0.705520 | 2.221200  |
| H  | -0.882736 | -0.516132 | 4.550999  |
| C  | 0.734709  | 1.305212  | 2.089081  |
| C  | -0.186779 | 0.224141  | 4.130608  |
| H  | 1.561948  | 1.505629  | 2.786196  |
| C  | -0.133819 | 0.133457  | 2.605384  |
| H  | 0.802309  | 0.039170  | 4.575406  |
| P  | 1.396395  | 1.098700  | 0.384932  |
| Ru | 0.008707  | 0.011613  | -0.996405 |
| H  | 3.174154  | 0.342053  | 2.774745  |
| H  | -3.746975 | -3.615135 | -1.776322 |
| H  | -1.702688 | -2.226145 | -1.604655 |
| C  | -3.190093 | -3.587641 | -0.837176 |
| C  | -2.036399 | -2.813088 | -0.739258 |
| C  | 0.466844  | -1.243453 | 2.235435  |
| C  | 3.723129  | 0.216720  | 1.837819  |
| H  | 0.052315  | -2.017216 | 2.898919  |
| C  | 3.119053  | 0.489730  | 0.603647  |
| H  | -4.548007 | -4.908130 | 0.199636  |
| C  | -3.637153 | -4.309486 | 0.268045  |
| H  | 1.548679  | -1.236279 | 2.437320  |
| P  | 0.217171  | -1.727283 | 0.474069  |
| C  | -1.306042 | -2.758456 | 0.456498  |
| H  | 5.503042  | -0.427837 | 2.868854  |
| C  | 5.046207  | -0.223860 | 1.897935  |
| C  | -2.916438 | -4.269167 | 1.461698  |
| C  | -1.752269 | -3.507945 | 1.553563  |
| C  | 3.881643  | 0.338475  | -0.564786 |
| H  | -3.257244 | -4.842014 | 2.326771  |
| H  | 3.438737  | 0.597353  | -1.532106 |
| H  | -1.193559 | -3.514103 | 2.493021  |
| C  | 5.784288  | -0.393530 | 0.728518  |
| C  | 1.519745  | -2.964188 | 0.098310  |

|   |           |           |           |
|---|-----------|-----------|-----------|
| C | 5.199880  | -0.104103 | -0.505481 |
| H | 0.284427  | -3.925797 | -1.405918 |
| H | 3.026786  | -2.252178 | 1.493427  |
| H | 6.820391  | -0.734557 | 0.778648  |
| C | 1.271303  | -3.884326 | -0.935529 |
| C | 2.791714  | -2.946746 | 0.685844  |
| H | 5.780226  | -0.210315 | -1.424883 |
| C | 2.269623  | -4.753295 | -1.371791 |
| C | 3.789954  | -3.817006 | 0.246380  |
| H | 2.053561  | -5.466641 | -2.170318 |
| H | 4.772822  | -3.788626 | 0.722527  |
| C | 3.535704  | -4.718215 | -0.786052 |
| H | 4.317841  | -5.399972 | -1.126207 |
| O | 1.338320  | -0.946993 | -2.525532 |
| C | 2.303702  | -1.665467 | -2.673731 |
| H | 3.056698  | -1.844924 | -1.872276 |
| H | 2.482184  | -2.164652 | -3.650859 |
| O | -0.628111 | 0.811727  | -2.691917 |
| H | -1.328827 | 1.475923  | -2.701294 |

### XIIIa

|    |           |           |           |
|----|-----------|-----------|-----------|
| H  | -2.429563 | 6.395508  | 1.103717  |
| H  | -3.949773 | 4.774520  | 2.227612  |
| C  | -2.286439 | 5.322555  | 0.959109  |
| C  | -3.138179 | 4.414010  | 1.592139  |
| H  | -0.592726 | 5.560540  | -0.363184 |
| C  | -1.261139 | 4.857621  | 0.139662  |
| C  | -2.957684 | 3.046225  | 1.412283  |
| H  | -3.638850 | 2.343726  | 1.903457  |
| H  | -5.781974 | -2.125681 | 0.616028  |
| H  | -6.894165 | -0.916350 | -1.257539 |
| H  | 3.501348  | 6.195486  | -1.174825 |
| H  | 2.988978  | 5.715595  | 1.213908  |
| C  | -1.080511 | 3.485771  | -0.046588 |
| C  | -5.286661 | -1.278457 | 0.136631  |
| C  | -5.907674 | -0.602534 | -0.910361 |
| C  | -1.919225 | 2.569504  | 0.594820  |
| H  | -3.560491 | -1.441151 | 1.396852  |
| C  | 3.132144  | 5.210736  | -0.880938 |
| C  | -4.025554 | -0.881264 | 0.582912  |
| C  | 2.843721  | 4.942611  | 0.456167  |
| H  | -0.284373 | 3.132284  | -0.702099 |
| C  | -5.266095 | 0.481084  | -1.513126 |
| H  | -5.748633 | 1.018268  | -2.332127 |
| H  | 3.185010  | 4.416372  | -2.889461 |
| C  | 2.954375  | 4.214617  | -1.841275 |
| C  | -3.375580 | 0.206534  | -0.011899 |
| H  | -1.867641 | 0.945231  | 2.822085  |
| C  | -4.010673 | 0.882008  | -1.068549 |
| C  | 2.372962  | 3.686148  | 0.835179  |
| H  | 2.158804  | 3.500938  | 1.890316  |
| H  | 0.389818  | 2.116260  | 2.064113  |
| H  | -3.517351 | 1.738474  | -1.538949 |
| H  | -0.103460 | 0.987963  | 4.490727  |
| P  | -1.687317 | 0.757592  | 0.418206  |
| C  | 2.480002  | 2.960311  | -1.465779 |
| C  | -1.395860 | 0.205082  | 2.156438  |
| C  | 2.180096  | 2.683529  | -0.124487 |
| H  | 2.332084  | 2.188978  | -2.227017 |
| H  | -1.934719 | -0.741044 | 2.322542  |
| H  | -0.521172 | -0.736833 | 4.508030  |
| C  | 0.966690  | 1.176788  | 2.028161  |
| C  | 0.164316  | 0.006186  | 4.074465  |
| H  | 1.816591  | 1.336036  | 2.708501  |
| C  | 0.085599  | 0.011187  | 2.547290  |
| H  | 1.179986  | -0.237405 | 4.419814  |
| P  | 1.569725  | 1.004376  | 0.293491  |
| Ru | -0.060111 | 0.012160  | -1.048086 |
| H  | 3.447828  | 0.271195  | 2.580300  |
| H  | -3.476908 | -4.443831 | -1.663340 |
| H  | -1.559516 | -2.877695 | -1.698952 |
| C  | -2.991761 | -4.163956 | -0.725669 |
| C  | -1.902421 | -3.296353 | -0.749087 |
| C  | 0.617513  | -1.349513 | 2.044949  |
| C  | 3.860678  | -0.096352 | 1.637595  |
| H  | 0.298811  | -2.154406 | 2.722169  |
| C  | 3.180312  | 0.099984  | 0.427586  |
| H  | -4.320566 | -5.346835 | 0.502563  |
| C  | -3.465146 | -4.667946 | 0.485216  |
| H  | 1.714013  | -1.339263 | 2.111606  |
| P  | 0.190060  | -1.798853 | 0.309174  |
| C  | -1.264071 | -2.919885 | 0.444320  |
| H  | 5.589034  | -0.918294 | 2.626445  |
| C  | 5.080718  | -0.771971 | 1.670847  |
| C  | -2.835829 | -4.305748 | 1.674699  |
| C  | -1.739864 | -3.442879 | 1.655846  |
| C  | 3.774440  | -0.379146 | -0.748436 |
| H  | -3.192028 | -4.702605 | 2.627899  |
| H  | 3.281681  | -0.235575 | -1.714189 |
| H  | -1.269625 | -3.189800 | 2.608547  |
| C  | 5.652659  | -1.248207 | 0.493306  |
| C  | 1.521832  | -2.945169 | -0.216945 |



|   |           |           |           |
|---|-----------|-----------|-----------|
| C | 4.998324  | -1.041683 | -0.720056 |
| H | 0.746628  | -3.029398 | -2.241462 |
| H | 2.535314  | -3.126438 | 1.700694  |
| H | 6.608422  | -1.775693 | 0.520366  |
| C | 1.527448  | -3.371778 | -1.553784 |
| C | 2.514665  | -3.419793 | 0.649141  |
| H | 5.436896  | -1.406795 | -1.651216 |
| C | 2.513852  | -4.237240 | -2.017619 |
| C | 3.505087  | -4.282242 | 0.179721  |
| H | 2.502245  | -4.562522 | -3.059994 |
| H | 4.277982  | -4.636189 | 0.865661  |
| C | 3.510870  | -4.689078 | -1.152222 |
| H | 4.287604  | -5.364818 | -1.516195 |
| O | -0.246886 | 1.773598  | -2.510358 |
| C | -0.939188 | 1.747068  | -3.509462 |
| H | -0.940130 | 2.623087  | -4.193262 |
| H | -1.563679 | 0.852158  | -3.724445 |
| O | -1.476400 | -0.725982 | -2.377955 |
| H | 1.375037  | -0.291062 | -2.117657 |
| H | 0.823981  | -0.868277 | -2.364346 |
| H | -2.319083 | -0.917522 | -1.947696 |

### XIIIa-XIVa

|    |           |           |           |
|----|-----------|-----------|-----------|
| H  | -0.298927 | -6.938669 | 1.031836  |
| H  | 1.772024  | -6.019706 | 2.068451  |
| C  | -0.037896 | -5.887443 | 0.892816  |
| C  | 1.122254  | -5.372579 | 1.475578  |
| H  | -1.759455 | -5.455741 | -0.337444 |
| C  | -0.854148 | -5.058617 | 0.128083  |
| C  | 1.458317  | -4.034774 | 1.295799  |
| H  | 2.379681  | -3.647642 | 1.742989  |
| H  | 6.100547  | -1.364452 | 0.901580  |
| H  | 6.502088  | -1.938105 | -1.487637 |
| H  | -5.917918 | -3.856277 | -1.385956 |
| H  | -4.723204 | -4.327740 | 0.745675  |
| C  | -0.517384 | -3.715754 | -0.053746 |
| C  | 5.256808  | -1.518878 | 0.225231  |
| C  | 5.481330  | -1.839354 | -1.112288 |
| C  | 0.635337  | -3.188453 | 0.534116  |
| H  | 3.809537  | -1.132204 | 1.761130  |
| C  | -5.150555 | -3.168732 | -1.024681 |
| C  | 3.955854  | -1.388444 | 0.708899  |
| C  | -4.480584 | -3.432928 | 0.168108  |
| H  | -1.157019 | -3.078044 | -0.663125 |
| C  | 4.398826  | -2.041302 | -1.969157 |
| H  | 4.569294  | -2.303753 | -3.015387 |
| H  | -5.388286 | -1.787323 | -2.670649 |
| C  | -4.849491 | -2.012597 | -1.747358 |
| C  | 2.864342  | -1.576665 | -0.147083 |
| H  | 1.225114  | -1.729264 | 2.755501  |
| C  | 3.099068  | -1.911377 | -1.489156 |
| C  | -3.499190 | -2.557619 | 0.635994  |
| H  | -2.982383 | -2.793758 | 1.569162  |
| H  | -1.301355 | -1.719585 | 2.171334  |
| H  | 2.249290  | -2.081537 | -2.157982 |
| H  | -0.243721 | -0.926295 | 4.513156  |
| P  | 1.112839  | -1.420597 | 0.347319  |
| C  | -3.875834 | -1.134330 | -1.278500 |
| C  | 1.147131  | -0.840985 | -2.108846 |
| C  | -3.180818 | -1.402509 | -0.086855 |
| H  | -3.666664 | -0.208615 | -1.826886 |
| H  | 2.069206  | -0.261809 | 2.267595  |
| H  | 0.919995  | 0.412726  | 4.467137  |
| C  | -1.391823 | -0.622633 | 2.103890  |
| C  | -0.050676 | 0.066705  | 4.082334  |
| H  | -2.198787 | -0.339442 | 2.797260  |
| C  | -0.055071 | 0.018622  | 2.554031  |
| H  | -0.823452 | 0.751365  | 4.461135  |
| P  | -1.886111 | -0.194775 | 0.382638  |
| Ru | -0.114290 | -0.024389 | -1.043698 |
| H  | -4.021062 | 0.545968  | 2.297266  |
| H  | 5.225361  | 1.669150  | -1.638893 |
| H  | 2.765720  | 1.364728  | -1.679156 |
| C  | 4.653841  | 1.783016  | -0.714812 |
| C  | 3.270082  | 1.625387  | -0.743691 |
| C  | 0.077022  | 1.471881  | 2.035073  |
| C  | -3.887314 | 1.381652  | 1.603912  |
| H  | 0.726964  | 2.051275  | 2.706677  |
| C  | -2.930070 | 1.312846  | 0.578099  |
| H  | 6.394320  | 2.190444  | 0.500945  |
| C  | 5.308803  | 2.069812  | 0.481676  |
| H  | -0.905005 | 1.969050  | 2.085144  |
| P  | 0.685619  | 1.648229  | 0.304678  |
| C  | 2.519291  | 1.763322  | 0.434720  |
| H  | -5.437235 | 2.544946  | 2.541975  |
| C  | -4.698414 | 2.504506  | 1.738795  |
| C  | 4.571118  | 2.201664  | 1.656764  |
| C  | 3.184227  | 2.057408  | 1.634291  |
| C  | -2.831363 | 2.377031  | -0.323981 |
| H  | 5.073655  | 2.429834  | 2.599344  |
| H  | -2.103317 | 2.333715  | -1.137200 |
| H  | 2.637319  | 2.182533  | 2.571974  |
| C  | -4.576287 | 3.570063  | 0.844158  |
| C  | 0.255301  | 3.359991  | -0.173139 |

|   |           |           |           |
|---|-----------|-----------|-----------|
| C | -3.648987 | 3.500125  | -0.191612 |
| H | 0.798537  | 2.984672  | -2.238445 |
| H | -0.334060 | 4.064382  | 1.797586  |
| H | -5.213623 | 4.450127  | 0.952972  |
| C | 0.426502  | 3.720656  | -1.517760 |
| C | -0.199741 | 4.315751  | 0.742759  |
| H | -3.548985 | 4.324850  | -0.900961 |
| C | 0.130327  | 5.014209  | -1.938933 |
| C | -0.496495 | 5.609560  | 0.315189  |
| H | 0.268217  | 5.287211  | -2.987272 |
| H | -0.855224 | 6.347279  | 1.036183  |
| C | -0.336825 | 5.959573  | -1.024179 |
| H | -0.569994 | 6.973511  | -1.356098 |
| O | -0.766019 | -1.643242 | -2.421660 |
| C | -1.559868 | -1.626843 | -3.341648 |
| H | -1.765795 | -2.548487 | -3.924073 |
| H | -2.093484 | -0.699513 | -3.646347 |
| O | 1.224206  | 0.520143  | -2.739120 |
| H | -0.952217 | 1.068609  | -2.248663 |
| H | -0.109771 | 0.925977  | -2.648955 |
| H | 1.320441  | -0.255128 | -3.306924 |

**XIVa**

|    |           |           |           |
|----|-----------|-----------|-----------|
| H  | -4.819768 | 5.160287  | 0.987430  |
| H  | -5.002793 | 3.396669  | 2.736021  |
| C  | -4.242658 | 4.237660  | 0.896068  |
| C  | -4.342248 | 3.251107  | 1.878553  |
| H  | -3.335516 | 4.798864  | -0.981153 |
| C  | -3.413282 | 4.034438  | -0.204216 |
| C  | -3.612004 | 2.070926  | 1.762398  |
| H  | -3.735951 | 1.298440  | 2.526635  |
| H  | -5.055591 | -3.575594 | 0.692889  |
| H  | -6.096312 | -3.030067 | -1.504014 |
| H  | 1.137032  | 6.833759  | -1.429499 |
| H  | -0.564864 | 6.039721  | 0.209607  |
| C  | -2.672037 | 2.857508  | -0.315124 |
| C  | -4.713382 | -2.708194 | 0.123559  |
| C  | -5.296471 | -2.403925 | -1.103972 |
| C  | -2.754621 | 1.865740  | 0.670416  |
| H  | -3.261499 | -2.179680 | 1.607697  |
| C  | 1.172277  | 5.808802  | -1.054474 |
| C  | -3.690265 | -1.912161 | 0.640437  |
| C  | 0.220098  | 5.364316  | -0.138603 |
| H  | -2.011607 | 2.709748  | -1.172045 |
| C  | -4.862996 | -1.281757 | -1.811469 |
| H  | -5.331417 | -1.017762 | -2.762472 |
| H  | 2.942694  | 5.287145  | -2.179507 |
| C  | 2.180870  | 4.941751  | -1.476782 |
| C  | -3.230042 | -0.796330 | -0.066501 |
| H  | -2.009234 | 0.323631  | 2.864005  |
| C  | -3.840619 | -0.486171 | -1.297060 |
| C  | 0.263852  | 4.056623  | 0.345169  |
| H  | -0.499508 | 3.735984  | 1.057373  |
| H  | -0.160532 | 2.084040  | 2.207855  |
| H  | -3.528162 | 0.413667  | -1.842108 |
| H  | -0.349629 | 0.746024  | 4.532181  |
| P  | -1.827705 | 0.288343  | 0.427795  |
| C  | 2.230159  | 3.636154  | -0.989432 |
| C  | -1.381540 | -0.229284 | 2.149303  |
| C  | 1.267516  | 3.174803  | -0.075216 |
| H  | 3.036874  | 2.969543  | -1.310953 |
| H  | -1.650944 | -1.287964 | 2.276168  |
| H  | -0.295612 | -1.026481 | 4.460110  |
| C  | 0.640214  | 1.333902  | 2.105047  |
| C  | 0.171729  | -0.107642 | 4.075238  |
| H  | 1.439016  | 1.656486  | 2.789501  |
| C  | 0.102993  | -0.048142 | 2.547864  |
| H  | 1.213120  | -0.090328 | 4.428321  |
| P  | 1.280023  | 1.396061  | 0.371805  |
| Ru | 0.076452  | 0.118026  | -1.027104 |
| H  | 3.306563  | 2.337813  | 2.333218  |
| H  | -2.040881 | -5.141022 | -1.915923 |
| H  | -0.515172 | -3.199343 | -1.854651 |
| C  | -1.728006 | -4.729779 | -0.953494 |
| C  | -0.873402 | -3.631466 | -0.917997 |
| C  | 0.994136  | -1.187315 | 1.999591  |
| C  | 3.805382  | 1.677466  | 1.617873  |
| H  | 0.902855  | -2.077071 | 2.639537  |
| C  | 3.085246  | 1.086407  | 0.566515  |
| H  | -2.837587 | -6.178372 | 0.206526  |
| C  | -2.171836 | -5.313011 | 0.233635  |
| H  | 2.052133  | -0.885740 | 2.079070  |
| P  | 0.716947  | -1.655293 | 0.235665  |
| C  | -0.454684 | -3.083724 | 0.305714  |
| H  | 5.719818  | 1.918205  | 2.574480  |
| C  | 5.172650  | 1.452855  | 1.751788  |
| C  | -1.746671 | -4.793920 | 1.453826  |
| C  | -0.894338 | -3.689415 | 1.490544  |
| C  | 3.773101  | 0.298948  | -0.362809 |
| H  | -2.073321 | -5.253224 | 2.389729  |
| H  | 3.222424  | -0.137620 | -1.199195 |
| H  | -0.578726 | -3.314619 | 2.467294  |
| C  | 5.843378  | 0.642068  | 0.833828  |
| C  | 2.252490  | -2.554542 | -0.218828 |

|   |           |           |           |
|---|-----------|-----------|-----------|
| C | 5.143668  | 0.074362  | -0.227806 |
| H | 1.922915  | -2.257402 | -2.331990 |
| H | 2.861355  | -3.033170 | 1.812193  |
| H | 6.915103  | 0.463340  | 0.944523  |
| C | 2.563602  | -2.720291 | -1.574606 |
| C | 3.087266  | -3.130122 | 0.747354  |
| H | 5.660998  | -0.553162 | -0.957367 |
| C | 3.695344  | -3.436253 | -1.956616 |
| C | 4.226069  | -3.836858 | 0.362839  |
| H | 3.928704  | -3.557487 | -3.016779 |
| H | 4.875181  | -4.271983 | 1.125742  |
| C | 4.533001  | -3.990554 | -0.987981 |
| H | 5.424421  | -4.546195 | -1.286874 |
| O | -0.412246 | 1.810368  | -2.412269 |
| C | 0.389586  | 2.427489  | -3.089092 |
| H | 0.064912  | 3.306989  | -3.684528 |
| H | 1.456274  | 2.124340  | -3.148958 |
| O | -1.071733 | -1.066332 | -2.619483 |
| H | 1.380988  | -0.077993 | -2.016360 |
| H | -1.098587 | -0.602226 | -3.465336 |
| H | -2.002353 | -1.227097 | -2.383641 |

**XV**

|    |           |           |           |
|----|-----------|-----------|-----------|
| H  | 6.520345  | -2.376413 | 0.075584  |
| H  | 5.703979  | -1.320827 | -2.026702 |
| C  | 5.449806  | -2.235357 | -0.088240 |
| C  | 4.993792  | -1.646909 | -1.263674 |
| H  | 4.878890  | -3.117126 | 1.801760  |
| C  | 4.530496  | -2.646717 | 0.879445  |
| C  | 3.624455  | -1.474294 | -1.477542 |
| H  | 3.301231  | -1.022675 | -2.418462 |
| H  | 1.201719  | -6.526365 | -1.460915 |
| H  | -1.046224 | -7.029156 | -0.515518 |
| H  | 6.949382  | 1.934742  | 0.761911  |
| H  | 5.909625  | 3.127557  | -1.162266 |
| C  | 3.169002  | -2.454835 | 0.673676  |
| C  | 0.584579  | -5.720518 | -1.057890 |
| C  | -0.675596 | -6.001942 | -0.528803 |
| C  | 2.694431  | -1.868418 | -0.510089 |
| H  | 2.055768  | -4.208181 | -1.484948 |
| C  | 5.881758  | 1.822213  | 0.560818  |
| C  | 1.063320  | -4.412332 | -1.072942 |
| C  | 5.300487  | 2.488107  | -0.519678 |
| H  | 2.457382  | -2.763163 | 1.446096  |
| C  | -1.457827 | -4.967786 | -0.017862 |
| H  | -2.449062 | -5.177981 | 0.392884  |
| H  | 5.544760  | 0.491071  | 2.227167  |
| C  | 5.094865  | 1.018335  | 1.382425  |
| C  | 0.283002  | -3.364474 | -0.558912 |
| H  | 1.464354  | -1.599678 | -3.015577 |
| C  | -0.980595 | -3.657643 | -0.031878 |
| C  | 3.939612  | 2.345869  | -0.775878 |
| H  | 3.493494  | 2.889816  | -1.614512 |
| H  | 2.341018  | 0.886531  | -2.456001 |
| H  | -1.594203 | -2.849410 | 0.366305  |
| H  | 1.496678  | 0.159788  | -4.639564 |
| P  | 0.875319  | -1.624163 | -0.651107 |
| C  | 3.731394  | 0.871954  | 1.124408  |
| C  | 0.601314  | -1.229185 | -2.440392 |
| C  | 3.142742  | 1.527428  | 0.040132  |
| H  | 3.114730  | 0.223332  | 1.754455  |
| H  | -0.239734 | -1.854950 | -2.777576 |
| H  | -0.189918 | -0.347804 | -4.851446 |
| C  | 1.326921  | 1.208686  | -2.171946 |
| C  | 0.462627  | 0.363727  | -4.325126 |
| H  | 1.208310  | 2.206530  | -2.623033 |
| C  | 0.308100  | 0.240134  | -2.804768 |
| H  | 0.202995  | 1.373327  | -4.675465 |
| P  | 1.341317  | 1.395388  | -0.318826 |
| Ru | 0.053138  | -0.092164 | 0.779281  |
| H  | -0.412257 | 3.335180  | -1.810035 |
| H  | -4.028093 | -3.659073 | -2.283936 |
| H  | -2.155361 | -2.070610 | -2.154058 |
| C  | -4.144150 | -2.739753 | -1.705204 |
| C  | -3.087319 | -1.833844 | -1.633134 |
| C  | -1.150002 | 0.623341  | -2.480897 |
| C  | -0.036024 | 3.820955  | -0.906530 |
| H  | -1.819351 | 0.019484  | -3.114852 |
| C  | 0.840102  | 3.145629  | -0.048393 |
| H  | -6.171829 | -3.176997 | -1.101086 |
| C  | -5.340512 | -2.471392 | -1.042345 |
| H  | -1.310994 | 1.663851  | -2.806031 |
| P  | -1.764720 | 0.499195  | -0.719463 |
| C  | -3.202345 | -0.645486 | -0.899536 |
| H  | -1.133678 | 5.628760  | -1.312708 |
| C  | -0.452197 | 5.121459  | -0.626129 |
| C  | -5.472778 | -1.288435 | -0.315036 |
| C  | -4.415868 | -0.383275 | -0.244161 |
| C  | 1.302328  | 3.815973  | 1.096625  |
| H  | -6.411604 | -1.061916 | 0.195405  |
| H  | 2.044272  | 3.336703  | 1.743156  |
| H  | -4.543351 | 0.541361  | 0.325426  |
| C  | -0.007831 | 5.765273  | 0.526484  |
| C  | -2.685603 | 2.083265  | -0.520438 |

|   |           |           |           |
|---|-----------|-----------|-----------|
| C | 0.874081  | 5.109924  | 1.386688  |
| H | -2.094302 | 2.349126  | 1.537663  |
| H | -3.499132 | 2.090592  | -2.534336 |
| H | -0.334717 | 6.783470  | 0.747619  |
| C | -2.681645 | 2.749330  | 0.709557  |
| C | -3.447084 | 2.612496  | -1.573984 |
| H | 1.251720  | 5.619704  | 2.276106  |
| C | -3.408851 | 3.927680  | 0.881292  |
| C | -4.164106 | 3.794408  | -1.405759 |
| H | -3.391782 | 4.439823  | 1.846209  |
| H | -4.751337 | 4.195403  | -2.234946 |
| C | -4.144672 | 4.456517  | -0.176501 |
| H | -4.710613 | 5.381357  | -0.044533 |
| O | -0.477122 | 1.259088  | 2.490001  |
| C | 0.286936  | 1.769500  | 3.282680  |
| H | 1.388776  | 1.638636  | 3.201633  |
| H | 1.300475  | -0.531170 | 1.748746  |
| H | -0.098257 | 2.373866  | 4.131090  |
| C | -2.543333 | -1.323000 | 2.461137  |
| O | -1.142979 | -1.429324 | 2.148898  |
| C | -0.482546 | -2.311322 | 3.076590  |
| C | -1.602746 | -2.977533 | 3.843545  |
| C | -2.668945 | -1.891870 | 3.855655  |
| H | -2.840132 | -0.267673 | 2.364084  |
| H | -3.120014 | -1.911889 | 1.723087  |
| H | 0.149385  | -3.005567 | 2.501333  |
| H | 0.176772  | -1.705560 | 3.723682  |
| H | -1.963905 | -3.864683 | 3.299402  |
| H | -1.294743 | -3.308851 | 4.843165  |
| H | -3.678233 | -2.263501 | 4.072951  |
| H | -2.430680 | -1.123298 | 4.608042  |

**IXc**

|    |           |           |           |
|----|-----------|-----------|-----------|
| H  | 6.301071  | -2.769938 | -0.986229 |
| H  | 4.892777  | -2.899601 | -3.039350 |
| C  | 5.232425  | -2.551466 | -0.934405 |
| C  | 4.445483  | -2.619552 | -2.083214 |
| H  | 5.245770  | -2.147741 | 1.188652  |
| C  | 4.643675  | -2.206446 | 0.279331  |
| C  | 3.081086  | -2.343692 | -2.018590 |
| H  | 2.494019  | -2.427264 | -2.935773 |
| H  | -2.067167 | -5.726507 | -1.814991 |
| H  | -1.019200 | -7.124081 | -0.037625 |
| H  | 6.875242  | 1.193449  | 1.571881  |
| H  | 6.414265  | 1.215324  | -0.876573 |
| C  | 3.282036  | -1.915233 | 0.337446  |
| C  | -1.298049 | -5.303077 | -1.164787 |
| C  | -0.711451 | -6.085203 | -0.172631 |
| C  | 2.476496  | -1.972548 | -0.807572 |
| H  | -1.382812 | -3.393820 | -2.132506 |
| C  | 5.845953  | 1.218420  | 1.207499  |
| C  | -0.903755 | -3.976836 | -1.343903 |
| C  | 5.588426  | 1.231356  | -0.161808 |
| H  | 2.857462  | -1.628899 | 1.302511  |
| C  | 0.286529  | -5.537923 | 0.634549  |
| H  | 0.769910  | -6.147992 | 1.400727  |
| H  | 4.972928  | 1.249074  | 3.184785  |
| C  | 4.782462  | 1.246774  | 2.109425  |
| C  | 0.084699  | -3.409807 | -0.528792 |
| H  | 0.682308  | -1.815689 | -3.122716 |
| C  | 0.682434  | -4.215590 | 0.453760  |
| C  | 4.275538  | 1.262949  | -0.629385 |
| H  | 4.107519  | 1.273457  | -1.708767 |
| H  | 2.410651  | 0.226669  | -2.235631 |
| H  | 1.490817  | -3.813214 | 1.072421  |
| H  | 1.402369  | -0.039339 | -4.594078 |
| P  | 0.653031  | -1.661876 | -0.684271 |
| C  | 3.469040  | 1.275604  | 1.646294  |
| C  | 0.148080  | -1.191201 | -2.391815 |
| C  | 3.199651  | 1.274889  | 0.269645  |
| H  | 2.655022  | 1.293607  | 2.376383  |
| H  | -0.911632 | -1.469685 | -2.502156 |
| H  | -0.363702 | -0.081433 | -4.778905 |
| C  | 1.568419  | 0.919506  | -2.094967 |
| C  | 0.462585  | 0.421858  | -4.256033 |
| H  | 1.834895  | 1.843389  | -2.631946 |
| C  | 0.307163  | 0.310253  | -2.738138 |
| H  | 0.472055  | 1.472550  | -4.580160 |
| P  | 1.450801  | 1.338551  | -0.287408 |
| Ru | -0.013986 | -0.005371 | 0.839671  |
| H  | 2.881876  | 3.555806  | -1.575990 |
| H  | -4.089933 | -3.649902 | -0.441661 |
| H  | -2.267105 | -2.076344 | 0.139155  |
| C  | -4.075114 | -2.651895 | -0.888416 |
| C  | -3.045491 | -1.767240 | -0.561276 |
| C  | -0.941786 | 1.119572  | -2.334158 |
| C  | 2.007249  | 3.978440  | -1.071007 |
| H  | -1.731748 | 0.995917  | -3.092652 |
| C  | 1.137047  | 3.151503  | -0.340832 |
| H  | -5.878969 | -2.956578 | -2.035737 |
| C  | -5.071892 | -2.266578 | -1.780642 |
| H  | -0.678864 | 2.190339  | -2.329728 |
| P  | -1.676263 | 0.720899  | -0.684093 |
| C  | -3.005287 | -0.485670 | -1.119116 |
| H  | 2.463663  | 5.981936  | -1.713337 |
| C  | 1.779327  | 5.348674  | -1.144727 |
| C  | -5.038996 | -0.989778 | -2.345949 |
| C  | -4.018368 | -0.104180 | -2.014064 |
| C  | 0.053486  | 3.725267  | 0.330975  |
| H  | -5.820130 | -0.678556 | -3.042668 |
| H  | -0.605768 | 3.091351  | 0.927191  |
| H  | -4.023189 | 0.901752  | -2.445343 |
| C  | 0.683548  | 5.912402  | -0.486547 |
| C  | -2.694912 | 2.200853  | -0.317023 |



|   |           |           |           |
|---|-----------|-----------|-----------|
| C | -0.172384 | 5.101158  | 0.252785  |
| H | -3.037265 | 1.597343  | 1.730865  |
| H | -2.543105 | 3.115277  | -2.287660 |
| H | 0.506933  | 6.988600  | -0.545480 |
| C | -3.267995 | 2.328831  | 0.957088  |
| C | -2.966660 | 3.180381  | -1.283357 |
| H | -1.026066 | 5.535094  | 0.778985  |
| C | -4.086554 | 3.415919  | 1.254898  |
| C | -3.789476 | 4.264294  | -0.981142 |
| H | -4.519247 | 3.506677  | 2.253578  |
| H | -3.991164 | 5.017088  | -1.746176 |
| C | -4.349462 | 4.386682  | 0.288848  |
| H | -4.991498 | 5.237797  | 0.525568  |
| O | -0.762487 | 1.373377  | 2.249411  |
| C | 0.091899  | 1.955712  | 3.117380  |
| H | 0.863214  | 2.597739  | 2.632018  |
| O | 0.874753  | 1.028986  | 3.883015  |
| H | 0.278028  | 0.591096  | 4.502567  |
| H | 1.263544  | -0.797096 | 1.772194  |
| H | 1.047743  | -0.158594 | 2.294736  |
| H | -0.475148 | 2.602010  | 3.820675  |
| C | -2.642266 | -0.988946 | 2.605841  |
| O | -1.369268 | -1.383178 | 2.067834  |
| C | -0.852249 | -2.362995 | 2.971983  |
| C | -2.047965 | -3.250647 | 3.233632  |
| C | -3.221999 | -2.261190 | 3.225250  |
| H | -2.480981 | -0.182720 | 3.340368  |
| H | -3.232452 | -0.577376 | 1.775535  |
| H | -0.003600 | -2.859501 | 2.485875  |
| H | -0.486919 | -1.862702 | 3.890554  |
| H | -2.141682 | -3.981921 | 2.415287  |
| H | -1.961419 | -3.818616 | 4.168591  |
| H | -4.068673 | -2.645764 | 2.641123  |
| H | -3.602533 | -2.064861 | 4.236592  |

**IXc-XIb**

|    |           |           |           |
|----|-----------|-----------|-----------|
| H  | 5.695925  | -3.808347 | -0.656193 |
| H  | 4.556673  | -3.484120 | -2.847486 |
| C  | 4.676681  | -3.417726 | -0.692241 |
| C  | 4.041316  | -3.232342 | -1.918072 |
| H  | 4.494955  | -3.239675 | 1.454115  |
| C  | 4.004877  | -3.100734 | 0.488067  |
| C  | 2.740859  | -2.729705 | -1.965856 |
| H  | 2.268316  | -2.605347 | -2.943158 |
| H  | -3.911220 | -4.127971 | 0.096063  |
| H  | -2.880555 | -6.400100 | 0.144420  |
| H  | 6.974306  | -0.068174 | 1.311331  |
| H  | 6.453049  | -0.120594 | -1.125042 |
| C  | 2.710885  | -2.590745 | 0.438751  |
| C  | -2.837350 | -4.249276 | -0.067679 |
| C  | -2.260769 | -5.520050 | -0.040215 |
| C  | 2.060119  | -2.392618 | -0.787873 |
| H  | -2.499993 | -2.136444 | -0.283844 |
| C  | 5.959323  | 0.133914  | 0.962376  |
| C  | -2.044517 | -3.127984 | -0.293886 |
| C  | 5.668329  | 0.105210  | -0.399325 |
| H  | 2.201473  | -2.331123 | 1.371599  |
| C  | -0.890596 | -5.662708 | -0.251329 |
| H  | -0.434176 | -6.654663 | -0.235339 |
| H  | 5.163761  | 0.470584  | 2.945438  |
| C  | 4.948216  | 0.431733  | 1.875561  |
| C  | -0.663927 | -3.261716 | -0.508737 |
| H  | 0.453134  | -1.954522 | -3.188786 |
| C  | -0.092939 | -4.542228 | -0.485244 |
| C  | 4.373310  | 0.364281  | -0.848083 |
| H  | 4.184672  | 0.342572  | -1.923552 |
| H  | 2.346557  | -0.184356 | -2.447217 |
| H  | 0.979900  | -4.673858 | -0.645118 |
| H  | 1.241652  | -0.314786 | -4.760417 |
| P  | 0.338304  | -1.745900 | -0.759642 |
| C  | 3.652754  | 0.684051  | 1.432145  |
| C  | -0.049724 | -1.264562 | -2.494666 |
| C  | 3.346107  | 0.646670  | 0.063313  |
| H  | 2.885174  | 0.905538  | 2.177625  |
| H  | -1.120896 | -1.479391 | -2.620180 |
| H  | -0.517370 | -0.116329 | -4.886880 |
| C  | 1.622546  | 0.625134  | -2.274784 |
| C  | 0.386962  | 0.274848  | -4.397288 |
| H  | 2.006640  | 1.504499  | -2.815045 |
| C  | 0.267803  | 0.202564  | -2.873829 |
| H  | 0.528333  | 1.310654  | -4.738193 |
| P  | 1.624809  | 1.031826  | -0.460940 |
| Ru | -0.019274 | -0.045807 | 0.701925  |
| H  | -0.021716 | 3.074305  | 0.847436  |
| H  | -6.167464 | -0.572942 | 0.388958  |
| H  | -4.022934 | 0.594906  | 0.744821  |
| C  | -5.408554 | -0.586862 | -0.396717 |
| C  | -4.193673 | 0.061259  | -0.193660 |
| C  | -0.843848 | 1.191525  | -2.445175 |
| C  | 0.712060  | 3.604767  | 0.240749  |
| H  | -1.641091 | 1.222325  | -3.203488 |
| C  | 1.649065  | 2.870426  | -0.488358 |
| H  | -6.616102 | -1.742252 | -1.769114 |
| C  | -5.663444 | -1.234268 | -1.606254 |
| H  | -0.422037 | 2.211193  | -2.422255 |
| P  | -1.600267 | 0.904284  | -0.786387 |
| C  | -3.201463 | 0.067842  | -1.186279 |
| H  | -0.027723 | 5.557976  | 0.776523  |
| C  | 0.716854  | 4.999494  | 0.204299  |
| C  | -4.703667 | -1.204011 | -2.614723 |
| C  | -3.485388 | -0.555107 | -2.409141 |
| C  | 2.618758  | 3.554504  | -1.238529 |
| H  | -4.902621 | -1.682319 | -3.576043 |
| H  | 3.385732  | 3.000959  | -1.789941 |
| H  | -2.767699 | -0.535534 | -3.232030 |
| C  | 1.670443  | 5.670605  | -0.556755 |
| C  | -2.293638 | 2.538430  | -0.319240 |

|   |           |           |           |
|---|-----------|-----------|-----------|
| C | 2.625932  | 4.945633  | -1.273119 |
| H | -2.642053 | 3.222919  | -2.350954 |
| H | -2.062517 | 2.159191  | 1.796977  |
| H | 1.678826  | 6.762181  | -0.587674 |
| C | -2.737308 | 3.449718  | -1.285657 |
| C | -2.451072 | 2.847373  | 1.038811  |
| H | 3.385142  | 5.468926  | -1.858181 |
| C | -3.316091 | 4.657032  | -0.898252 |
| C | -3.039771 | 4.051467  | 1.422348  |
| H | -3.654329 | 5.363537  | -1.659210 |
| H | -3.154661 | 4.285751  | 2.483248  |
| C | -3.471031 | 4.958800  | 0.454677  |
| H | -3.929426 | 5.903577  | 0.754600  |
| O | -0.142726 | 1.118638  | 2.663292  |
| C | 0.719021  | 2.055803  | 3.202963  |
| H | 1.375280  | 2.536598  | 2.451425  |
| O | 1.607178  | 1.482689  | 4.122742  |
| H | 1.090306  | 1.152040  | 4.867825  |
| H | 1.176950  | -0.604115 | 1.875224  |
| H | 0.709325  | 0.083400  | 2.372495  |
| H | 0.110655  | 2.859375  | 3.671191  |
| C | -2.573202 | -0.847477 | 2.664314  |
| O | -1.374343 | -1.321971 | 2.018197  |
| C | -0.774230 | -2.368771 | 2.811940  |
| C | -1.856285 | -2.793107 | 3.775132  |
| C | -2.558412 | -1.470896 | 4.040954  |
| H | -2.548969 | 0.251469  | 2.669686  |
| H | -3.436901 | -1.193490 | 2.069539  |
| H | -0.426993 | -3.161108 | 2.131514  |
| H | 0.101749  | -1.955564 | 3.343635  |
| H | -2.541332 | -3.510368 | 3.296570  |
| H | -1.452532 | -3.271389 | 4.676382  |
| H | -3.563446 | -1.577647 | 4.468404  |
| H | -1.965168 | -0.851589 | 4.731671  |

## IXc-XV

|    |           |           |           |
|----|-----------|-----------|-----------|
| H  | 6.172334  | -3.013259 | -1.005497 |
| H  | 4.752804  | -3.101990 | -3.052082 |
| C  | 5.115083  | -2.744819 | -0.952286 |
| C  | 4.321648  | -2.790856 | -2.098060 |
| H  | 5.157592  | -2.317284 | 1.164777  |
| C  | 4.547563  | -2.358235 | 0.259410  |
| C  | 2.970945  | -2.454067 | -2.031777 |
| H  | 2.375369  | -2.523394 | -2.944946 |
| H  | -2.290059 | -5.618401 | -1.792737 |
| H  | -1.264803 | -7.059908 | -0.037044 |
| H  | 6.968944  | 1.021010  | 1.440043  |
| H  | 6.455838  | 1.046652  | -0.997191 |
| C  | 3.200905  | -2.004180 | 0.320073  |
| C  | -1.500680 | -5.223419 | -1.148919 |
| C  | -0.926495 | -6.030159 | -0.169230 |
| C  | 2.390646  | -2.042158 | -0.822231 |
| H  | -1.535827 | -3.306926 | -2.104563 |
| C  | 5.933044  | 1.062047  | 1.097101  |
| C  | -1.067105 | -3.908921 | -1.324141 |
| C  | 5.645385  | 1.077169  | -0.265606 |
| H  | 2.774783  | -1.678377 | 1.271855  |
| C  | 0.097475  | -5.519319 | 0.629121  |
| H  | 0.569982  | -6.149039 | 1.386188  |
| H  | 5.106882  | 1.108964  | 3.091996  |
| C  | 4.888949  | 1.108217  | 2.021421  |
| C  | -0.051111 | -3.378206 | -0.518160 |
| H  | 0.585408  | -1.821819 | -3.123525 |
| C  | 0.533140  | -4.209158 | 0.451304  |
| C  | 4.323300  | 1.129833  | -0.706624 |
| H  | 4.134182  | 1.142567  | -1.782238 |
| H  | 2.400829  | 0.160924  | -2.273390 |
| H  | 1.359109  | -3.834055 | 1.063379  |
| H  | 1.369725  | -0.085144 | -4.606692 |
| P  | 0.583585  | -1.652897 | -0.682953 |
| C  | 3.570269  | 1.154655  | 1.579104  |
| C  | 0.082901  | -1.173433 | -2.390720 |
| C  | 3.265601  | 1.157341  | 0.211679  |
| H  | 2.753154  | 1.177680  | 2.304709  |
| H  | -0.988465 | -1.409411 | -2.488710 |
| H  | -0.397368 | -0.052541 | -4.783521 |
| C  | 1.583339  | 0.878630  | -2.111433 |
| C  | 0.451949  | 0.417111  | -4.266294 |
| H  | 1.872718  | 1.802085  | -2.637064 |
| C  | 0.297339  | 0.318840  | -2.747555 |
| H  | 0.504145  | 1.465188  | -4.595269 |
| P  | 1.496632  | 1.258839  | -0.293561 |
| Ru | -0.013822 | -0.025053 | 0.820844  |
| H  | 2.929060  | 3.469742  | -1.628200 |
| H  | -4.284786 | -3.428455 | -0.539948 |
| H  | -2.383873 | -1.954257 | 0.064716  |
| C  | -4.229985 | -2.417998 | -0.954824 |
| C  | -3.157275 | -1.591117 | -0.615835 |
| C  | -0.913924 | 1.182322  | -2.340936 |
| C  | 2.110751  | 3.907246  | -1.047284 |
| H  | -1.710031 | 1.096654  | -3.098405 |
| C  | 1.258982  | 3.087619  | -0.288108 |
| H  | -6.063174 | -2.601660 | -2.081666 |
| C  | -5.221621 | -1.957844 | -1.817275 |
| H  | -0.601369 | 2.239854  | -2.337105 |
| P  | -1.652392 | 0.810573  | -0.682896 |
| C  | -3.064121 | -0.295663 | -1.134064 |
| H  | 2.607430  | 5.913676  | -1.649993 |
| C  | 1.938814  | 5.287734  | -1.055093 |
| C  | -5.138599 | -0.665579 | -2.340487 |
| C  | -4.071734 | 0.160500  | -1.998934 |
| C  | 0.253341  | 3.681482  | 0.480523  |
| H  | -5.915285 | -0.296358 | -3.013602 |
| H  | -0.400563 | 3.054925  | 1.088274  |
| H  | -4.033501 | 1.177995  | -2.400577 |
| C  | 0.919433  | 5.871058  | -0.298538 |
| C  | -2.573363 | 2.355861  | -0.304090 |

|   |           |           |           |
|---|-----------|-----------|-----------|
| C | 0.083636  | 5.067690  | 0.471586  |
| H | -2.918708 | 1.760937  | 1.746573  |
| H | -2.402452 | 3.273640  | -2.270299 |
| H | 0.785901  | 6.954996  | -0.306958 |
| C | -3.109149 | 2.515670  | 0.982692  |
| C | -2.796606 | 3.361581  | -1.255619 |
| H | -0.713073 | 5.515439  | 1.070490  |
| C | -3.845104 | 3.652923  | 1.307465  |
| C | -3.533063 | 4.498942  | -0.926941 |
| H | -4.251797 | 3.763019  | 2.315213  |
| H | -3.696847 | 5.271389  | -1.681503 |
| C | -4.058322 | 4.649022  | 0.354839  |
| H | -4.634671 | 5.540651  | 0.610833  |
| O | -0.685194 | 1.331821  | 2.403494  |
| C | 0.127447  | 1.687027  | 3.320946  |
| H | 1.030505  | 2.280227  | 3.035482  |
| O | 0.846145  | 0.296405  | 3.884055  |
| H | 1.716522  | 0.472724  | 4.275175  |
| H | 1.194240  | -0.677564 | 1.877089  |
| H | 1.008069  | -0.222296 | 2.835797  |
| H | -0.317729 | 2.062922  | 4.263509  |
| C | -2.705678 | -0.912293 | 2.541606  |
| O | -1.427385 | -1.335322 | 2.043619  |
| C | -1.009862 | -2.390297 | 2.918514  |
| C | -2.257161 | -3.236205 | 3.045547  |
| C | -3.385102 | -2.193522 | 3.026419  |
| H | -2.545494 | -0.181328 | 3.351800  |
| H | -3.226782 | -0.403023 | 1.719326  |
| H | -0.149760 | -2.889790 | 2.458709  |
| H | -0.693111 | -1.957452 | 3.885972  |
| H | -2.329171 | -3.913230 | 2.179674  |
| H | -2.257117 | -3.861010 | 3.947885  |
| H | -4.202934 | -2.495132 | 2.358077  |
| H | -3.829450 | -2.047816 | 4.020137  |

**IXc-XV (thf)**

|    |           |           |           |
|----|-----------|-----------|-----------|
| H  | 4.879970  | -2.526106 | -3.868881 |
| H  | 2.736165  | -2.833133 | -5.101995 |
| C  | 3.927059  | -2.349739 | -3.365343 |
| C  | 2.727345  | -2.516868 | -4.056614 |
| H  | 4.832237  | -1.827051 | -1.476043 |
| C  | 3.898837  | -1.961890 | -2.028187 |
| C  | 1.510353  | -2.294555 | -3.415619 |
| H  | 0.589684  | -2.458960 | -3.980447 |
| H  | -2.960986 | -5.774708 | -1.096749 |
| H  | -1.187123 | -7.154413 | -0.018834 |
| H  | 6.343528  | 1.691407  | -1.828076 |
| H  | 4.852664  | 1.687727  | -3.823052 |
| C  | 2.680677  | -1.721989 | -1.394001 |
| C  | -1.995393 | -5.329747 | -0.844974 |
| C  | -1.003667 | -6.101872 | -0.244389 |
| C  | 1.467307  | -1.877082 | -2.076345 |
| H  | -2.559494 | -3.411903 | -1.615221 |
| C  | 5.260928  | 1.617675  | -1.703847 |
| C  | -1.762275 | -3.985915 | -1.139597 |
| C  | 4.426669  | 1.618042  | -2.819698 |
| H  | 2.670712  | -1.392142 | -0.352443 |
| C  | 0.232377  | -5.525266 | 0.050024  |
| H  | 1.024598  | -6.126075 | 0.502296  |
| H  | 5.340752  | 1.539647  | 0.458372  |
| C  | 4.702620  | 1.530600  | -0.428521 |
| C  | -0.531142 | -3.390085 | -0.835210 |
| H  | -1.135544 | -1.786841 | -3.413349 |
| C  | 0.465925  | -4.185676 | -0.247768 |
| C  | 3.043727  | 1.531185  | -2.663991 |
| H  | 2.418166  | 1.539014  | -3.559396 |
| H  | 0.741621  | 0.320917  | -3.315399 |
| H  | 1.450254  | -3.755169 | -0.037922 |
| H  | -1.146014 | 0.001499  | -5.031511 |
| P  | -0.138608 | -1.618476 | -1.182619 |
| C  | 3.322262  | 1.433349  | -0.273481 |
| C  | -1.331227 | -1.178548 | -2.517921 |
| C  | 2.473485  | 1.428853  | -1.387803 |
| H  | 2.904492  | 1.345521  | 0.732635  |
| H  | -2.329535 | -1.490459 | -2.172063 |
| H  | -2.826792 | -0.094724 | -4.464937 |
| C  | 0.013841  | 0.978044  | -2.816757 |
| C  | -1.872956 | 0.435629  | -4.328883 |
| H  | -0.002692 | 1.914787  | -3.394958 |
| C  | -1.380293 | 0.325534  | -2.884786 |
| H  | -2.030892 | 1.484835  | -4.618415 |
| P  | 0.652787  | 1.363722  | -1.113123 |
| Ru | -0.158574 | -0.035668 | 0.481393  |
| H  | 1.099557  | 3.679329  | -2.909127 |
| H  | -4.379393 | -3.711969 | 0.939555  |
| H  | -2.494580 | -2.112228 | 0.725321  |
| C  | -4.567189 | -2.700123 | 0.569037  |
| C  | -3.504443 | -1.802807 | 0.446444  |
| C  | -2.368764 | 1.100454  | -1.990553 |
| C  | 0.611402  | 4.047386  | -2.001165 |
| H  | -3.400499 | 0.950090  | -2.348358 |
| C  | 0.286346  | 3.165646  | -0.956826 |
| H  | -6.690178 | -3.007132 | 0.317177  |
| C  | -5.856835 | -2.308034 | 0.219575  |
| H  | -2.156942 | 2.177489  | -2.095129 |
| P  | -2.317909 | 0.693723  | -0.182921 |
| C  | -3.718761 | -0.504056 | -0.025411 |
| H  | 0.593542  | 6.080979  | -2.708333 |
| C  | 0.337691  | 5.406776  | -1.887990 |
| C  | -6.082092 | -1.013184 | -0.252920 |
| C  | -5.023522 | -0.117116 | -0.370370 |
| C  | -0.286175 | 3.678390  | 0.211587  |
| H  | -7.091706 | -0.697312 | -0.524323 |
| H  | -0.521990 | 3.000644  | 1.034659  |
| H  | -5.220111 | 0.900778  | -0.721620 |
| C  | -0.254186 | 5.907641  | -0.725932 |
| C  | -3.087261 | 2.179325  | 0.578490  |

|   |           |           |           |
|---|-----------|-----------|-----------|
| C | -0.556583 | 5.044037  | 0.322686  |
| H | -2.498741 | 1.576594  | 2.569784  |
| H | -3.811165 | 3.095822  | -1.258361 |
| H | -0.469618 | 6.975017  | -0.640039 |
| C | -3.044269 | 2.309996  | 1.974790  |
| C | -3.749613 | 3.163082  | -0.170046 |
| H | -1.014056 | 5.427783  | 1.237852  |
| C | -3.646102 | 3.398387  | 2.602095  |
| C | -4.349493 | 4.251779  | 0.461352  |
| H | -3.599086 | 3.487809  | 3.689759  |
| H | -4.860359 | 5.008246  | -0.138433 |
| C | -4.299297 | 4.373355  | 1.848462  |
| H | -4.769296 | 5.226917  | 2.341832  |
| O | -0.216185 | 1.272711  | 2.204418  |
| C | 0.906055  | 1.596472  | 2.785408  |
| H | 1.579845  | 2.294306  | 2.225103  |
| O | 1.751752  | 0.323905  | 2.951305  |
| H | 2.730649  | 0.512796  | 2.969597  |
| H | 1.412317  | -0.614667 | 0.925258  |
| H | 1.532469  | -0.183152 | 1.901100  |
| H | 0.792863  | 1.959955  | 3.827588  |
| C | -1.799136 | -1.106184 | 3.155422  |
| O | -0.843231 | -1.453067 | 2.143169  |
| C | -0.056166 | -2.506807 | 2.705478  |
| C | -1.099301 | -3.417710 | 3.314615  |
| C | -2.157324 | -2.431139 | 3.830897  |
| H | -1.336021 | -0.383734 | 3.848047  |
| H | -2.640328 | -0.606239 | 2.655791  |
| H | 0.539791  | -2.949457 | 1.899213  |
| H | 0.629760  | -2.085631 | 3.465072  |
| H | -1.515642 | -4.070332 | 2.530910  |
| H | -0.691794 | -4.069483 | 4.098191  |
| H | -3.173873 | -2.756175 | 3.570943  |
| H | -2.129539 | -2.332181 | 4.924449  |
| C | 5.415491  | 1.109047  | 3.507193  |
| O | 4.392331  | 0.468890  | 2.726214  |
| C | 4.828371  | -0.834679 | 2.306858  |
| C | 6.093380  | -1.110118 | 3.092759  |
| C | 6.664931  | 0.289105  | 3.267073  |
| H | 5.492589  | 2.157613  | 3.184925  |
| H | 5.118232  | 1.101897  | 4.570660  |
| H | 4.015600  | -1.555828 | 2.493850  |
| H | 5.010538  | -0.810962 | 1.216437  |
| H | 5.851089  | -1.550810 | 4.072157  |
| H | 6.770840  | -1.805154 | 2.580830  |
| H | 7.392244  | 0.371314  | 4.084539  |
| H | 7.171426  | 0.617137  | 2.345569  |

**IX-Xb**

|    |           |           |           |
|----|-----------|-----------|-----------|
| H  | 6.449176  | 2.224879  | 0.233981  |
| H  | 5.219911  | 2.526064  | 2.379519  |
| C  | 5.362171  | 2.123657  | 0.262281  |
| C  | 4.675317  | 2.288113  | 1.463258  |
| H  | 5.182056  | 1.700442  | -1.849235 |
| C  | 4.653779  | 1.831435  | -0.902324 |
| C  | 3.287413  | 2.157702  | 1.502284  |
| H  | 2.782169  | 2.301936  | 2.460206  |
| H  | -1.015634 | 6.265464  | 1.062289  |
| H  | -1.103192 | 6.802018  | -1.366975 |
| H  | 6.612521  | -1.924690 | -1.492091 |
| H  | 6.187015  | -1.626808 | 0.942748  |
| C  | 3.269631  | 1.690523  | -0.862008 |
| C  | -0.704208 | 5.522288  | 0.325166  |
| C  | -0.751685 | 5.822657  | -1.035371 |
| C  | 2.565894  | 1.846104  | 0.340914  |
| H  | -0.222699 | 4.065195  | 1.824767  |
| C  | 5.590022  | -1.817352 | -1.123874 |
| C  | -0.256159 | 4.273836  | 0.752869  |
| C  | 5.352277  | -1.650539 | 0.238767  |
| H  | 2.729603  | 1.435144  | -1.777680 |
| C  | -0.343936 | 4.872103  | -1.971498 |
| H  | -0.375178 | 5.102520  | -3.038359 |
| H  | 4.695318  | -1.990419 | -3.083760 |
| C  | 4.517203  | -1.852812 | -2.015138 |
| C  | 0.143188  | 3.310048  | -0.183028 |
| H  | 0.889975  | 2.104673  | 2.699935  |
| C  | 0.100583  | 3.622017  | -1.549271 |
| C  | 4.048156  | -1.514471 | 0.714027  |
| H  | 3.891818  | -1.396433 | 1.788741  |
| H  | 2.253247  | -0.181925 | 2.196827  |
| H  | 0.399422  | 2.877703  | -2.291429 |
| H  | 1.248740  | 0.499087  | 4.466060  |
| P  | 0.732893  | 1.649964  | 0.305801  |
| C  | 3.215594  | -1.706046 | -1.545069 |
| C  | 0.223677  | 1.494396  | 2.073280  |
| C  | 2.967245  | -1.529845 | -0.176493 |
| H  | 2.380678  | -1.713091 | -2.252682 |
| H  | -0.766434 | 1.969623  | 2.159029  |
| H  | -0.496411 | 0.808030  | 4.574988  |
| C  | 1.338736  | -0.789320 | 2.117404  |
| C  | 0.260370  | 0.129578  | 4.155333  |
| H  | 1.505715  | -1.652641 | 2.778017  |
| C  | 0.151144  | 0.052021  | 2.632360  |
| H  | 0.114190  | -0.857776 | 4.617302  |
| P  | 1.224178  | -1.351234 | 0.364858  |
| Ru | -0.069165 | -0.050862 | -0.953536 |
| H  | 0.863271  | -3.449345 | 2.569060  |
| H  | -3.670737 | 3.899453  | -1.243359 |
| H  | -2.237690 | 1.877211  | -1.286771 |
| C  | -3.667913 | 3.222586  | -0.386095 |
| C  | -2.862606 | 2.083879  | -0.410875 |
| C  | -1.204972 | -0.610709 | 2.289498  |
| C  | 0.572168  | -3.862877 | 1.600735  |
| H  | -1.976214 | -0.277351 | 3.000574  |
| C  | 0.647804  | -3.094752 | 0.431074  |
| H  | -5.075186 | 4.396377  | 0.755972  |
| C  | -4.452299 | 3.499599  | 0.731481  |
| H  | -1.125410 | -1.701272 | 2.427594  |
| P  | -1.785356 | -0.284840 | 0.573298  |
| C  | -2.845059 | 1.206505  | 0.682975  |
| H  | 0.066941  | -5.767810 | 2.472640  |
| C  | 0.120061  | -5.182187 | 1.552282  |
| C  | -4.448642 | 2.624831  | 1.819522  |
| C  | -3.657090 | 1.478944  | 1.793782  |
| C  | 0.277814  | -3.683006 | -0.788826 |
| H  | -5.073186 | 2.831886  | 2.691143  |
| H  | 0.333359  | -3.098700 | -1.711685 |
| H  | -3.688608 | 0.794149  | 2.645919  |
| C  | -0.251022 | -5.753894 | 0.336482  |
| C  | -2.986912 | -1.613326 | 0.176579  |



|   |           |           |           |
|---|-----------|-----------|-----------|
| C | -0.165764 | -5.002089 | -0.835552 |
| H | -4.221233 | -0.280528 | -1.013204 |
| H | -1.992884 | -3.215311 | 1.261231  |
| H | -0.599197 | -6.788457 | 0.301534  |
| C | -4.054594 | -1.312330 | -0.688441 |
| C | -2.814594 | -2.940517 | 0.596155  |
| H | -0.446287 | -5.445534 | -1.793434 |
| C | -4.921755 | -2.313704 | -1.121460 |
| C | -3.691212 | -3.937063 | 0.167713  |
| H | -5.750142 | -2.060362 | -1.786489 |
| H | -3.546260 | -4.962837 | 0.513990  |
| C | -4.742081 | -3.629715 | -0.694476 |
| H | -5.425265 | -4.412979 | -1.028834 |
| O | -0.982170 | 0.845785  | -2.866889 |
| C | -1.636195 | -0.269011 | -3.298148 |
| H | -2.732130 | -0.180473 | -3.157030 |
| O | -1.160071 | -1.393945 | -2.493771 |
| H | -1.914400 | -1.860157 | -2.099900 |
| H | 0.275940  | 0.544205  | -2.730987 |
| H | 1.117218  | 0.222048  | -2.291513 |
| H | -1.427729 | -0.511887 | -4.356755 |

**Xb**

|    |           |           |           |
|----|-----------|-----------|-----------|
| H  | 6.776550  | 1.189694  | 0.553118  |
| H  | 5.504712  | 1.939162  | 2.559074  |
| C  | 5.687504  | 1.262443  | 0.515599  |
| C  | 4.975654  | 1.678037  | 1.640023  |
| H  | 5.550243  | 0.612230  | -1.540258 |
| C  | 5.002175  | 0.941821  | -0.654645 |
| C  | 3.585422  | 1.769917  | 1.596309  |
| H  | 3.059881  | 2.110178  | 2.491843  |
| H  | -0.169187 | 6.392874  | 0.651188  |
| H  | 0.274383  | 6.828238  | -1.758161 |
| H  | 6.248618  | -3.189000 | -1.223550 |
| H  | 5.712419  | -2.910715 | 1.191497  |
| C  | 3.612240  | 1.022227  | -0.696135 |
| C  | 0.177517  | 5.584451  | 0.003701  |
| C  | 0.425918  | 5.828747  | -1.345513 |
| C  | 2.884050  | 1.431253  | 0.429278  |
| H  | 0.164143  | 4.141955  | 1.596769  |
| C  | 5.253117  | -2.859697 | -0.918020 |
| C  | 0.369254  | 4.309313  | 0.536636  |
| C  | 4.953618  | -2.703294 | 0.433797  |
| H  | 3.074412  | 0.737315  | -1.604947 |
| C  | 0.883395  | 4.795275  | -2.165288 |
| H  | 1.100963  | 4.987956  | -3.218321 |
| H  | 4.501704  | -2.726778 | -2.939662 |
| C  | 4.274967  | -2.600154 | -1.878663 |
| C  | 0.811198  | 3.263030  | -0.281078 |
| H  | 1.130918  | 2.045320  | 2.698557  |
| C  | 1.075517  | 3.521617  | -1.636043 |
| C  | 3.682963  | -2.285074 | 0.827741  |
| H  | 3.472351  | -2.182439 | 1.894932  |
| H  | 2.182993  | -0.490681 | 2.183092  |
| H  | 1.454772  | 2.711272  | -2.270961 |
| H  | 1.313142  | 0.374458  | 4.421082  |
| P  | 1.047118  | 1.541826  | 0.296991  |
| C  | 3.010169  | -2.169378 | -1.488610 |
| C  | 0.432423  | 1.513905  | 2.035311  |
| C  | 2.703180  | -2.000425 | -0.131929 |
| H  | 2.254714  | -1.931011 | -2.243640 |
| H  | -0.495678 | 2.109159  | 2.052538  |
| H  | -0.365070 | 0.943605  | 4.544394  |
| C  | 1.177980  | -0.929874 | 2.083488  |
| C  | 0.277181  | 0.157939  | 4.120873  |
| H  | 1.182708  | -1.813523 | 2.738732  |
| C  | 0.142360  | 0.093279  | 2.598852  |
| H  | -0.012565 | -0.794670 | 4.588299  |
| P  | 1.007748  | -1.456038 | 0.317793  |
| Ru | -0.029014 | 0.056805  | -0.967112 |
| H  | 0.259744  | -3.492237 | 2.486778  |
| H  | -3.138132 | 4.728204  | -0.426584 |
| H  | -1.780743 | 2.671047  | -0.719540 |
| C  | -3.359801 | 3.842678  | 0.173694  |
| C  | -2.592059 | 2.688060  | 0.011624  |
| C  | -1.301854 | -0.363938 | 2.277513  |
| C  | -0.097182 | -3.831462 | 1.511249  |
| H  | -2.007076 | 0.098944  | 2.986193  |
| C  | 0.112029  | -3.064710 | 0.357584  |
| H  | -5.006989 | 4.763835  | 1.221459  |
| C  | -4.404596 | 3.861786  | 1.094290  |
| H  | -1.374165 | -1.451502 | 2.440603  |
| P  | -1.845530 | 0.026466  | 0.554937  |
| C  | -2.859144 | 1.545552  | 0.773478  |
| H  | -0.919114 | -5.640775 | 2.346022  |
| C  | -0.765486 | -5.054500 | 1.437201  |
| C  | -4.687379 | 2.722039  | 1.850986  |
| C  | -3.922085 | 1.570835  | 1.690546  |
| C  | -0.345819 | -3.560893 | -0.873420 |
| H  | -5.512294 | 2.730738  | 2.566659  |
| H  | -0.173907 | -2.982056 | -1.785415 |
| H  | -4.163597 | 0.678337  | 2.277066  |
| C  | -1.223785 | -5.532058 | 0.210921  |
| C  | -3.145337 | -1.191077 | 0.122466  |

|   |           |           |           |
|---|-----------|-----------|-----------|
| C | -1.007330 | -4.783634 | -0.946466 |
| H | -3.922803 | 0.151989  | -1.396922 |
| H | -2.642435 | -2.763931 | 1.532430  |
| H | -1.741530 | -6.492192 | 0.155821  |
| C | -3.980599 | -0.853881 | -0.962232 |
| C | -3.275638 | -2.461168 | 0.695662  |
| H | -1.353241 | -5.156541 | -1.913125 |
| C | -4.910268 | -1.766804 | -1.458464 |
| C | -4.213727 | -3.368674 | 0.202067  |
| H | -5.558461 | -1.483930 | -2.291185 |
| H | -4.304379 | -4.351881 | 0.669656  |
| C | -5.026714 | -3.030816 | -0.877567 |
| H | -5.757987 | -3.745264 | -1.260500 |
| O | -1.233261 | 1.218882  | -2.652739 |
| C | -1.395438 | 0.066729  | -3.471590 |
| H | -2.380200 | 0.092978  | -3.965040 |
| O | -1.280934 | -1.046163 | -2.635565 |
| H | -2.155022 | -1.289364 | -2.275992 |
| H | -0.614317 | 1.838183  | -3.064278 |
| H | 1.198922  | 0.079961  | -2.086757 |
| H | -0.592799 | 0.009360  | -4.220777 |

**XIb**

|    |           |           |           |
|----|-----------|-----------|-----------|
| H  | -6.096468 | -3.261300 | -0.927524 |
| H  | -5.482273 | -1.932859 | -2.944150 |
| C  | -5.273568 | -2.544726 | -0.882222 |
| C  | -4.926719 | -1.804577 | -2.012637 |
| H  | -4.832992 | -2.927825 | 1.197775  |
| C  | -4.568456 | -2.358003 | 0.303940  |
| C  | -3.877648 | -0.889532 | -1.958142 |
| H  | -3.647836 | -0.310620 | -2.855793 |
| H  | -3.140748 | 5.258428  | -1.568187 |
| H  | -4.964144 | 5.224835  | 0.130263  |
| H  | -3.103908 | -6.343566 | 1.469833  |
| H  | -2.667453 | -6.061057 | -0.965014 |
| C  | -3.508863 | -1.453208 | 0.353586  |
| C  | -3.323421 | 4.358899  | -0.975598 |
| C  | -4.344890 | 4.339563  | -0.028348 |
| C  | -3.140297 | -0.712779 | -0.776492 |
| H  | -1.748016 | 3.275749  | -1.940411 |
| C  | -2.503994 | -5.502975 | 1.114674  |
| C  | -2.533997 | 3.227561  | -1.184499 |
| C  | -2.260425 | -5.344381 | -0.248437 |
| H  | -2.945386 | -1.326311 | 1.281238  |
| C  | -4.583193 | 3.175692  | 0.703144  |
| H  | -5.393221 | 3.143117  | 1.434983  |
| H  | -2.158981 | -4.706067 | 3.093554  |
| C  | -1.974811 | -4.586485 | 2.023567  |
| C  | -2.754475 | 2.055672  | -0.447204 |
| H  | -1.981685 | 0.654084  | -3.093919 |
| C  | -3.799854 | 2.044650  | 0.490744  |
| C  | -1.491793 | -4.274494 | -0.704758 |
| H  | -1.303395 | -4.181393 | -1.777044 |
| H  | -1.419440 | -2.002849 | -2.249670 |
| H  | -4.015914 | 1.131490  | 1.053663  |
| H  | -1.124713 | -1.028820 | -4.608603 |
| P  | -1.760414 | 0.515883  | -0.662419 |
| C  | -1.221420 | -3.508186 | 1.566938  |
| C  | -1.135984 | 0.659020  | -2.390563 |
| C  | -0.975143 | -3.336885 | 0.198650  |
| H  | -0.842764 | -2.767635 | 2.278735  |
| H  | -0.689351 | 1.661837  | -2.485842 |
| H  | -0.071503 | 0.381721  | -4.844222 |
| C  | -0.348185 | -1.768460 | -2.152056 |
| C  | -0.163569 | -0.579383 | -4.318091 |
| H  | 0.168982  | -2.556914 | -2.718628 |
| C  | -0.075700 | -0.392871 | -2.802170 |
| H  | 0.636815  | -1.237711 | -4.687709 |
| P  | 0.062537  | -1.924331 | -0.354947 |
| Ru | -0.063963 | 0.038775  | 0.757695  |
| H  | 2.075125  | -2.898769 | -2.476897 |
| H  | -0.044595 | 5.518202  | -0.603083 |
| H  | -0.104687 | 3.091459  | -0.062456 |
| C  | 0.741832  | 4.857932  | -0.979850 |
| C  | 0.700833  | 3.494815  | -0.682862 |
| C  | 1.347718  | 0.107301  | -2.478707 |
| C  | 2.462270  | -3.089150 | -1.473352 |
| H  | 1.650485  | 0.865634  | -3.218853 |
| C  | 1.724346  | -2.739425 | -0.335802 |
| H  | 1.821672  | 6.438473  | -1.979566 |
| C  | 1.783863  | 5.371708  | -1.748896 |
| H  | 2.044224  | -0.733006 | -2.605969 |
| P  | 1.594296  | 0.829955  | -0.784001 |
| C  | 1.694511  | 2.632187  | -1.157503 |
| H  | 4.265909  | -3.968367 | -2.258221 |
| C  | 3.710777  | -3.702103 | -1.355623 |
| C  | 2.785480  | 4.519830  | -2.220184 |
| C  | 2.743094  | 3.159355  | -1.926732 |
| C  | 2.263651  | -3.056555 | 0.921613  |
| H  | 3.607066  | 4.920576  | -2.817769 |
| H  | 1.670209  | -2.865450 | 1.820567  |
| H  | 3.538865  | 2.502388  | -2.292605 |
| C  | 4.246832  | -3.976620 | -0.100918 |
| C  | 3.360450  | 0.464633  | -0.401486 |

|   |           |           |           |
|---|-----------|-----------|-----------|
| C | 3.512534  | -3.659642 | 1.042415  |
| H | 3.197843  | 1.512819  | 1.486519  |
| H | 3.911813  | -0.615287 | -2.206887 |
| H | 5.225271  | -4.452900 | -0.011863 |
| C | 3.856233  | 0.945707  | 0.823878  |
| C | 4.237692  | -0.242527 | -1.234283 |
| H | 3.906065  | -3.902707 | 2.032097  |
| C | 5.173623  | 0.711610  | 1.209788  |
| C | 5.556760  | -0.479659 | -0.846219 |
| H | 5.535532  | 1.100344  | 2.164259  |
| H | 6.220233  | -1.035519 | -1.512911 |
| C | 6.028556  | -0.010289 | 0.376753  |
| H | 7.061656  | -0.197014 | 0.676775  |
| O | 1.564767  | -0.310539 | 2.325818  |
| C | 1.213217  | -0.868197 | 3.609399  |
| H | 1.120635  | -1.971371 | 3.498867  |
| O | 0.074656  | -0.276701 | 4.044814  |
| H | -0.598394 | -0.412069 | 3.338517  |
| H | -1.213056 | -0.543385 | 1.810723  |
| H | 2.022329  | -0.650650 | 4.325788  |
| C | 0.877146  | 2.726024  | 2.487127  |
| O | -0.219084 | 1.927242  | 2.024382  |
| C | -1.337962 | 2.296132  | 2.844102  |
| C | -1.255798 | 3.804688  | 2.858486  |
| C | 0.256346  | 4.057933  | 2.916814  |
| H | 1.370153  | 2.203807  | 3.325141  |
| H | 1.593061  | 2.810408  | 1.658187  |
| H | -2.240374 | 1.873999  | 2.389713  |
| H | -1.206061 | 1.861478  | 3.851423  |
| H | -1.690393 | 4.205775  | 1.928825  |
| H | -1.803862 | 4.254847  | 3.696073  |
| H | 0.559684  | 4.881005  | 2.255694  |
| H | 0.584297  | 4.329916  | 3.929234  |
| H | 2.363453  | -0.738483 | 1.975286  |

## XIIb

|    |           |           |           |
|----|-----------|-----------|-----------|
| H  | -6.753363 | 0.889263  | -0.596023 |
| H  | -5.486992 | 1.845766  | -2.516198 |
| C  | -5.672640 | 1.029453  | -0.524577 |
| C  | -4.963748 | 1.560958  | -1.600877 |
| H  | -5.541026 | 0.263734  | 1.491368  |
| C  | -4.995124 | 0.681306  | 0.642352  |
| C  | -3.584257 | 1.741061  | -1.512393 |
| H  | -3.062966 | 2.174580  | -2.369416 |
| H  | -0.568853 | 6.588146  | -0.504562 |
| H  | -0.916065 | 6.956180  | 1.932970  |
| H  | -6.120051 | -3.465407 | 0.597758  |
| H  | -5.496338 | -2.826271 | -1.727455 |
| C  | -3.615138 | 0.849775  | 0.727172  |
| C  | -0.749154 | 5.738814  | 0.157876  |
| C  | -0.944121 | 5.944829  | 1.522277  |
| C  | -2.888887 | 1.375468  | -0.349835 |
| H  | -0.628748 | 4.314798  | -1.443555 |
| C  | -5.121421 | -3.078533 | 0.384234  |
| C  | -0.783009 | 4.448579  | -0.370403 |
| C  | -4.773081 | -2.719989 | -0.916031 |
| H  | -3.085271 | 0.547872  | 1.634698  |
| C  | -1.184177 | 4.855497  | 2.360556  |
| H  | -1.349483 | 5.011453  | 3.428628  |
| H  | -4.442717 | -3.240293 | 2.430192  |
| C  | -4.184654 | -2.950130 | 1.409502  |
| C  | -1.006914 | 3.347964  | 0.466974  |
| H  | -1.138280 | 2.267462  | -2.512356 |
| C  | -1.215867 | 3.565909  | 1.836409  |
| C  | -3.498345 | -2.227509 | -1.193435 |
| H  | -3.253863 | -1.971169 | -2.226208 |
| H  | -2.002992 | -0.329141 | -2.265379 |
| H  | -1.409217 | 2.716007  | 2.498905  |
| H  | -1.116460 | 0.768426  | -4.385784 |
| P  | -1.070517 | 1.623812  | -0.151930 |
| C  | -2.916830 | -2.444708 | 1.136845  |
| C  | -0.411492 | 1.744526  | -1.873501 |
| C  | -2.560716 | -2.067969 | -0.164486 |
| H  | -2.194544 | -2.337258 | 1.948469  |
| H  | 0.463711  | 2.413784  | -1.824642 |
| H  | 0.516916  | 1.466445  | -4.382666 |
| C  | -0.979713 | -0.724616 | -2.174990 |
| C  | -0.079314 | 0.601079  | -4.059452 |
| H  | -0.919384 | -1.533949 | -2.918100 |
| C  | 0.002905  | 0.407405  | -2.543790 |
| H  | 0.299936  | -0.281362 | -4.595784 |
| P  | -0.861936 | -1.440230 | -0.475686 |
| Ru | 0.082449  | 0.075822  | 1.028284  |
| H  | 0.404950  | -2.975458 | -2.805363 |
| H  | 2.815749  | 5.075337  | 0.776552  |
| H  | 1.593287  | 2.936347  | 0.931147  |
| C  | 3.135342  | 4.227952  | 0.165752  |
| C  | 2.446247  | 3.016889  | 0.251961  |
| C  | 1.463646  | 0.030830  | -2.204345 |
| C  | 0.552852  | -3.521474 | -1.870302 |
| H  | 2.153726  | 0.601868  | -2.845575 |
| C  | 0.066202  | -3.020015 | -0.656989 |
| H  | 4.767476  | 5.295702  | -0.758405 |
| C  | 4.225395  | 4.350080  | -0.691958 |
| H  | 1.627708  | -1.028591 | -2.454859 |
| P  | 1.944158  | 0.313438  | -0.442422 |
| C  | 2.835322  | 1.919850  | -0.522934 |
| H  | 1.605356  | -5.113831 | -2.870774 |
| C  | 1.237519  | -4.737085 | -1.913696 |
| C  | 4.629815  | 3.257651  | -1.462604 |
| C  | 3.940919  | 2.051686  | -1.379219 |
| C  | 0.261159  | -3.779853 | 0.510467  |
| H  | 5.491148  | 3.345449  | -2.128143 |
| H  | -0.156605 | -3.435524 | 1.463097  |
| H  | 4.277923  | 1.197830  | -1.975927 |
| C  | 1.444768  | -5.470351 | -0.747913 |
| C  | 3.315899  | -0.847035 | -0.095508 |

|   |           |           |           |
|---|-----------|-----------|-----------|
| C | 0.948157  | -4.991181 | 0.464819  |
| H | 4.003461  | 0.395777  | 1.541809  |
| H | 2.891312  | -2.328249 | -1.627602 |
| H | 1.979007  | -6.421884 | -0.785260 |
| C | 4.142891  | -0.544999 | 0.999773  |
| C | 3.508254  | -2.059417 | -0.768774 |
| H | 1.082197  | -5.571582 | 1.380404  |
| C | 5.135485  | -1.430806 | 1.405497  |
| C | 4.500171  | -2.950542 | -0.355400 |
| H | 5.774382  | -1.176307 | 2.253853  |
| H | 4.637539  | -3.889601 | -0.896473 |
| C | 5.313927  | -2.640791 | 0.731530  |
| H | 6.092097  | -3.336931 | 1.051170  |
| O | 1.380660  | -1.374416 | 2.241551  |
| C | 0.949558  | -1.739141 | 3.556937  |
| H | 1.604351  | -2.533002 | 3.943674  |
| O | -0.341310 | -2.198586 | 3.586009  |
| H | -0.903665 | -1.454673 | 3.297478  |
| H | -1.218289 | -0.190341 | 2.026899  |
| H | 1.097900  | -0.823739 | 4.155429  |
| H | 1.609905  | -2.169465 | 1.732331  |
| H | 0.277404  | 1.102237  | 2.435009  |
| H | 1.012607  | 1.243565  | 1.985128  |

**XIIb-XV**

|    |           |           |           |
|----|-----------|-----------|-----------|
| H  | 0.667573  | -6.999755 | -0.373901 |
| H  | -1.272704 | -6.245833 | -1.743319 |
| C  | 0.339927  | -5.958932 | -0.331895 |
| C  | -0.744980 | -5.535900 | -1.102953 |
| H  | 1.837901  | -5.373479 | 1.111172  |
| C  | 0.993437  | -5.052035 | 0.497342  |
| C  | -1.163494 | -4.210243 | -1.051094 |
| H  | -2.029796 | -3.901751 | -1.645221 |
| H  | -6.021188 | -1.978161 | -0.986323 |
| H  | -6.528470 | -2.329976 | 1.426376  |
| H  | 5.706752  | -4.331329 | 1.212619  |
| H  | 5.034194  | -4.153973 | -1.178351 |
| C  | 0.571939  | -3.722269 | 0.550229  |
| C  | -5.214316 | -1.978149 | -0.249823 |
| C  | -5.498260 | -2.173960 | 1.099420  |
| C  | -0.500252 | -3.282042 | -0.231026 |
| H  | -3.709701 | -1.641255 | -1.738939 |
| C  | 4.990255  | -3.569126 | 0.899638  |
| C  | -3.898940 | -1.781672 | -0.672116 |
| C  | 4.612998  | -3.470522 | -0.438073 |
| H  | 1.094103  | -3.028018 | 1.208866  |
| C  | -4.458357 | -2.179928 | 2.030039  |
| H  | -4.669977 | -2.346821 | 3.088438  |
| H  | 4.754512  | -2.746929 | 2.884619  |
| C  | 4.455125  | -2.684493 | 1.836335  |
| C  | -2.850509 | -1.766860 | 0.255890  |
| H  | -1.163107 | -2.037358 | -2.571877 |
| C  | -3.147140 | -1.975139 | 1.611277  |
| C  | 3.698151  | -2.498179 | -0.841326 |
| H  | 3.428346  | -2.436307 | -1.897915 |
| H  | 1.311781  | -1.899000 | -2.055866 |
| H  | -2.338396 | -1.977699 | 2.348618  |
| H  | 0.213081  | -1.294432 | -4.416981 |
| P  | -1.083182 | -1.532635 | -0.189707 |
| C  | 3.535514  | -1.717600 | 1.436827  |
| C  | -1.132050 | -1.098164 | -1.997656 |
| C  | 3.138608  | -1.620482 | 0.095156  |
| H  | 3.125436  | -1.028197 | 2.183244  |
| H  | -2.082241 | -0.584885 | -2.202057 |
| H  | -0.996823 | 0.003952  | -4.443143 |
| C  | 1.384812  | -0.798349 | -2.063393 |
| C  | -0.008965 | -0.281210 | -4.052086 |
| H  | 2.172633  | -0.564919 | -2.796029 |
| C  | 0.023164  | -0.221100 | -2.523487 |
| H  | 0.732041  | 0.401968  | -4.493077 |
| P  | 1.945633  | -0.308440 | -0.381989 |
| Ru | 0.091325  | 0.003968  | 1.060824  |
| H  | 2.881554  | 1.325783  | -2.784031 |
| H  | -5.332577 | 1.623503  | 1.550792  |
| H  | -2.864834 | 1.544312  | 1.612242  |
| C  | -4.768514 | 1.623839  | 0.615590  |
| C  | -3.378156 | 1.576641  | 0.647985  |
| C  | -0.163759 | 1.260831  | -2.111527 |
| C  | 3.360812  | 1.691249  | -1.872408 |
| H  | -0.810183 | 1.783155  | -2.833018 |
| C  | 3.102763  | 1.096672  | -0.630408 |
| H  | -6.529763 | 1.690318  | -0.634738 |
| C  | -5.438455 | 1.661136  | -0.607013 |
| H  | 0.796396  | 1.798095  | -2.166117 |
| P  | -0.794473 | 1.577470  | -0.409658 |
| C  | -2.628114 | 1.568841  | -0.536892 |
| H  | 4.430754  | 3.220981  | -2.948812 |
| C  | 4.241666  | 2.768725  | -1.973049 |
| C  | -4.707422 | 1.662923  | -1.792666 |
| C  | -3.313314 | 1.623808  | -1.758263 |
| C  | 3.756044  | 1.595798  | 0.508608  |
| H  | -5.221964 | 1.701391  | -2.755237 |
| H  | 3.548467  | 1.164209  | 1.489673  |
| H  | -2.769602 | 1.638266  | -2.706001 |
| C  | 4.882709  | 3.258169  | -0.837590 |
| C  | -0.421310 | 3.353221  | -0.163913 |



|   |           |           |           |
|---|-----------|-----------|-----------|
| C | 4.640350  | 2.665416  | 0.402399  |
| H | -2.446006 | 4.083637  | -0.464637 |
| H | 1.669556  | 2.955935  | 0.226370  |
| H | 5.574848  | 4.098909  | -0.919165 |
| C | -1.407145 | 4.346966  | -0.252091 |
| C | 0.902670  | 3.723990  | 0.115220  |
| H | 5.141939  | 3.040826  | 1.297024  |
| C | -1.067055 | 5.687411  | -0.071118 |
| C | 1.235987  | 5.064141  | 0.289396  |
| H | -1.841660 | 6.453767  | -0.143730 |
| H | 2.271032  | 5.337200  | 0.507224  |
| C | 0.251876  | 6.048923  | 0.197618  |
| H | 0.512723  | 7.099986  | 0.338711  |
| O | -0.554514 | 1.362417  | 3.810664  |
| C | 0.546874  | 2.211815  | 3.038584  |
| H | -0.083594 | 2.987961  | 2.538267  |
| O | 1.217037  | 1.397082  | 2.292273  |
| H | 1.072237  | -1.121086 | 2.045193  |
| H | 0.289840  | -1.193771 | 2.366653  |
| H | 1.119020  | 2.664198  | 3.873118  |
| H | -1.277065 | 1.933754  | 4.116540  |
| H | -0.940492 | 0.696424  | 2.861315  |
| H | -1.325785 | 0.184976  | 2.037832  |

## XIb-XV

|    |           |           |           |
|----|-----------|-----------|-----------|
| H  | 4.540467  | -5.219878 | 0.428826  |
| H  | 4.125882  | -4.291728 | -1.843000 |
| C  | 3.672927  | -4.581796 | 0.247116  |
| C  | 3.440745  | -4.063306 | -1.023481 |
| H  | 2.961566  | -4.689408 | 2.285725  |
| C  | 2.790084  | -4.282867 | 1.286308  |
| C  | 2.326658  | -3.255729 | -1.261111 |
| H  | 2.163155  | -2.881146 | -2.274968 |
| H  | -3.106305 | -5.647147 | -1.460249 |
| H  | -3.903830 | -5.893057 | 0.885293  |
| H  | 6.989278  | -1.776730 | 0.657504  |
| H  | 6.570578  | -0.630068 | -1.516003 |
| C  | 1.695283  | -3.458207 | 1.054287  |
| C  | -2.732735 | -4.978242 | -0.681840 |
| C  | -3.178230 | -5.117198 | 0.631820  |
| C  | 1.445957  | -2.935053 | -0.223375 |
| H  | -1.458330 | -3.915869 | -2.043004 |
| C  | 6.003911  | -1.359400 | 0.438902  |
| C  | -1.802936 | -3.992189 | -1.008993 |
| C  | 5.769003  | -0.720767 | -0.779645 |
| H  | 1.024945  | -3.204828 | 1.882235  |
| C  | -2.687442 | -4.265027 | 1.621251  |
| H  | -3.027767 | -4.370301 | 2.654165  |
| H  | 5.153412  | -1.957970 | 2.330371  |
| C  | 4.977539  | -1.457452 | 1.375082  |
| C  | -1.315566 | -3.122385 | -0.025139 |
| H  | 0.221818  | -2.441268 | -2.756613 |
| C  | -1.764529 | -3.274943 | 1.292405  |
| C  | 4.512555  | -0.189972 | -1.056512 |
| H  | 4.354487  | 0.328239  | -2.007443 |
| H  | 2.347624  | -0.746737 | -2.513920 |
| H  | -1.398695 | -2.590149 | 2.060311  |
| H  | 1.146143  | -1.214436 | -4.592956 |
| P  | -0.034267 | -1.848537 | -0.393210 |
| C  | 3.717109  | -0.926005 | 1.097777  |
| C  | -0.239676 | -1.596481 | -2.221836 |
| C  | 3.468482  | -0.296085 | -0.123026 |
| H  | 2.908382  | -1.006458 | 1.829814  |
| H  | -1.320667 | -1.685285 | -2.422916 |
| H  | -0.575644 | -0.817224 | -4.767841 |
| C  | 1.672412  | 0.101819  | -2.322792 |
| C  | 0.377104  | -0.468268 | -4.343641 |
| H  | 2.073353  | 0.929772  | -2.928976 |
| C  | 0.265646  | -0.263245 | -2.829659 |
| H  | 0.645021  | 0.467798  | -4.855572 |
| P  | 1.850922  | 0.510720  | -0.514953 |
| Ru | 0.017576  | 0.126882  | 0.715765  |
| H  | 1.488323  | 2.917519  | -2.331159 |
| H  | -5.033383 | -2.380356 | 0.226493  |
| H  | -2.946837 | -1.094785 | 0.594462  |
| C  | -4.715378 | -1.640792 | -0.512321 |
| C  | -3.540733 | -0.916723 | -0.302966 |
| C  | -0.736940 | 0.894428  | -2.603138 |
| C  | 2.137907  | 3.200818  | -1.499060 |
| H  | -1.525262 | 0.849075  | -3.370008 |
| C  | 2.490473  | 2.256010  | -0.526912 |
| H  | -6.384405 | -1.995262 | -1.835538 |
| C  | -5.467295 | -1.427428 | -1.664328 |
| H  | -0.231694 | 1.860258  | -2.765712 |
| P  | -1.536233 | 0.944513  | -0.933162 |
| C  | -3.099980 | 0.023664  | -1.239390 |
| H  | 2.317326  | 5.228212  | -2.213636 |
| C  | 2.608646  | 4.514214  | -1.439919 |
| C  | -5.048721 | -0.478631 | -2.600353 |
| C  | -3.876712 | 0.242381  | -2.389569 |
| C  | 3.374703  | 2.659050  | 0.490016  |
| H  | -5.642270 | -0.297250 | -3.499119 |
| H  | 3.723109  | 1.928030  | 1.226144  |
| H  | -3.579444 | 0.996766  | -3.124373 |
| C  | 3.457835  | 4.908162  | -0.407752 |
| C  | -2.138626 | 2.674198  | -0.787485 |

|   |           |           |           |
|---|-----------|-----------|-----------|
| C | 3.848696  | 3.971198  | 0.553912  |
| H | -4.238889 | 2.208167  | -0.511675 |
| H | -0.143435 | 3.477340  | -0.959780 |
| H | 3.834684  | 5.931907  | -0.363421 |
| C | -3.480173 | 2.994915  | -0.535861 |
| C | -1.196661 | 3.713277  | -0.790235 |
| H | 4.547282  | 4.256847  | 1.344435  |
| C | -3.861948 | 4.318893  | -0.314878 |
| C | -1.576819 | 5.035182  | -0.574652 |
| H | -4.912689 | 4.550794  | -0.127080 |
| H | -0.823015 | 5.827253  | -0.589278 |
| C | -2.916637 | 5.342790  | -0.335839 |
| H | -3.222103 | 6.376929  | -0.164642 |
| O | -0.040164 | 2.073240  | 1.797643  |
| C | 0.876726  | 2.565641  | 2.647413  |
| H | 0.549940  | 2.734964  | 3.689541  |
| O | 0.933737  | 3.954086  | 2.018991  |
| H | 1.775843  | 4.066219  | 1.526061  |
| H | 1.035985  | -0.469771 | 1.860488  |
| H | 1.891005  | 2.122879  | 2.615809  |
| C | -2.699931 | 0.834532  | 2.445190  |
| O | -1.623637 | -0.131686 | 2.329640  |
| C | -1.124359 | -0.439994 | 3.644229  |
| C | -2.266737 | -0.113345 | 4.572428  |
| C | -2.816232 | 1.147618  | 3.922929  |
| H | -2.455398 | 1.711841  | 1.830252  |
| H | -3.615594 | 0.366706  | 2.047005  |
| H | -0.796650 | -1.489659 | 3.647337  |
| H | -0.235275 | 0.182436  | 3.849583  |
| H | -3.016690 | -0.920038 | 4.560781  |
| H | -1.946498 | 0.026381  | 5.612782  |
| H | -3.843948 | 1.390236  | 4.221705  |
| H | -2.187624 | 2.013572  | 4.182560  |
| H | 0.171156  | 3.364716  | 1.373086  |

**XVI**

|    |           |           |           |
|----|-----------|-----------|-----------|
| H  | 6.750726  | -1.251857 | 0.036846  |
| H  | 5.447701  | -1.334927 | 2.156530  |
| C  | 5.765842  | -0.783721 | 0.094162  |
| C  | 5.036941  | -0.832599 | 1.278287  |
| H  | 5.810234  | -0.063339 | -1.944528 |
| C  | 5.236820  | -0.123137 | -1.016927 |
| C  | 3.779890  | -0.228532 | 1.354882  |
| H  | 3.247295  | -0.260560 | 2.308071  |
| H  | 4.330868  | 5.257978  | 0.660697  |
| H  | 2.745857  | 6.721027  | -0.584303 |
| H  | 4.630621  | -5.434783 | -0.290689 |
| H  | 2.858773  | -5.796298 | 1.421474  |
| C  | 3.976661  | 0.459797  | -0.946798 |
| C  | 3.409332  | 4.842040  | 0.248246  |
| C  | 2.520765  | 5.661111  | -0.448909 |
| C  | 3.226381  | 0.407628  | 0.238780  |
| H  | 3.838801  | 2.855011  | 0.955411  |
| C  | 3.796297  | -4.734600 | -0.211736 |
| C  | 3.129082  | 3.488438  | 0.415306  |
| C  | 2.804590  | -4.936920 | 0.749976  |
| H  | 3.567705  | 0.965524  | -1.827388 |
| C  | 1.348946  | 5.122404  | -0.975757 |
| H  | 0.648525  | 5.756400  | -1.523771 |
| H  | 4.484820  | -3.484030 | -1.832980 |
| C  | 3.714414  | -3.644967 | -1.075438 |
| C  | 1.950896  | 2.937385  | -0.114170 |
| H  | 1.914003  | 1.265241  | 2.595711  |
| C  | 1.063944  | 3.767561  | -0.810115 |
| C  | 1.738182  | -4.048652 | 0.849137  |
| H  | 0.957124  | -4.225823 | 1.595302  |
| H  | 1.544844  | -1.427306 | 2.223962  |
| H  | 0.136168  | 3.365233  | -1.222776 |
| H  | 1.097762  | -0.172108 | 4.360678  |
| P  | 1.558614  | 1.174871  | 0.203658  |
| C  | 2.649529  | -2.749435 | -0.974864 |
| C  | 1.010475  | 1.224598  | 1.966860  |
| C  | 1.657704  | -2.939555 | -0.008677 |
| H  | 2.594805  | -1.889093 | -1.646736 |
| H  | 0.534637  | 2.208337  | 2.102938  |
| H  | -0.103100 | 1.133205  | 4.398584  |
| C  | 0.476866  | -1.284412 | 2.003255  |
| C  | 0.105483  | 0.131397  | 3.996052  |
| H  | -0.035508 | -2.042859 | 2.615269  |
| C  | 0.048508  | 0.124848  | 2.465231  |
| H  | -0.632525 | -0.560022 | 4.427975  |
| P  | 0.274925  | -1.762617 | 0.222709  |
| Ru | 0.072132  | 0.082967  | -1.188470 |
| H  | -1.976179 | -2.426684 | 2.164099  |
| H  | -3.296589 | 4.712056  | -2.214861 |
| H  | -2.896309 | 2.300242  | -1.840347 |
| C  | -2.865171 | 4.377115  | -1.269191 |
| C  | -2.640127 | 3.021118  | -1.055611 |
| C  | -1.403886 | 0.443827  | 2.063194  |
| C  | -2.117620 | -2.967584 | 1.225986  |
| H  | -1.764392 | 1.300827  | 2.653175  |
| C  | -1.192305 | -2.856051 | 0.179960  |
| H  | -2.721931 | 6.369869  | -0.441482 |
| C  | -2.547233 | 5.305007  | -0.274370 |
| H  | -2.054316 | -0.391611 | 2.361825  |
| P  | -1.778469 | 0.764092  | 0.275579  |
| C  | -2.099026 | 2.567046  | 0.158959  |
| H  | -3.951932 | -3.856979 | 1.922840  |
| C  | -3.240894 | -3.783544 | 1.097148  |
| C  | -2.015014 | 4.865112  | 0.933910  |
| C  | -1.794464 | 3.503229  | 1.152096  |
| C  | -1.411766 | -3.591203 | -0.995474 |
| H  | -1.767926 | 5.583094  | 1.718720  |
| H  | -0.691090 | -3.540725 | -1.815545 |
| H  | -1.381783 | 3.191897  | 2.114822  |
| C  | -3.452980 | -4.500065 | -0.077832 |
| C  | -3.465823 | 0.072709  | 0.120317  |

|   |           |           |           |
|---|-----------|-----------|-----------|
| C | -2.532328 | -4.405851 | -1.122314 |
| H | -3.043990 | -1.170776 | -1.596754 |
| H | -4.200302 | 1.212893  | 1.820168  |
| H | -4.332765 | -5.139170 | -0.178713 |
| C | -3.798399 | -0.847935 | -0.878736 |
| C | -4.441297 | 0.475695  | 1.047514  |
| H | -2.684616 | -4.975284 | -2.041477 |
| C | -5.094595 | -1.362502 | -0.942208 |
| C | -5.727647 | -0.050211 | 0.983208  |
| H | -5.347933 | -2.081135 | -1.725005 |
| H | -6.480544 | 0.267296  | 1.707786  |
| C | -6.055894 | -0.971572 | -0.013775 |
| H | -7.067985 | -1.378780 | -0.066877 |
| O | -1.229543 | -0.967285 | -2.609405 |
| C | -0.045578 | -1.157388 | -3.028908 |
| H | 0.466100  | -2.129240 | -2.853236 |
| H | 1.514997  | -0.213970 | -1.879028 |
| H | 0.335698  | -0.595258 | -3.904522 |
| H | 0.288092  | 1.351154  | -2.409188 |
| H | -0.510958 | 1.482109  | -2.127888 |

**XVI-XVII**

|    |           |           |           |
|----|-----------|-----------|-----------|
| H  | 6.196226  | -2.983175 | -0.129057 |
| H  | 4.942244  | -2.801967 | 2.013577  |
| C  | 5.365735  | -2.280111 | -0.037132 |
| C  | 4.664717  | -2.179367 | 1.160530  |
| H  | 5.564431  | -1.531216 | -2.056459 |
| C  | 5.008909  | -1.470135 | -1.118110 |
| C  | 3.606593  | -1.275601 | 1.281605  |
| H  | 3.090763  | -1.207014 | 2.242312  |
| H  | 5.540418  | 3.911792  | 0.772016  |
| H  | 4.461006  | 5.718125  | -0.561285 |
| H  | 2.711836  | -6.622264 | -0.296384 |
| H  | 0.752499  | -6.506673 | 1.236416  |
| C  | 3.946644  | -0.580492 | -1.001738 |
| C  | 4.559642  | 3.748708  | 0.320488  |
| C  | 3.954398  | 4.760198  | -0.426541 |
| C  | 3.227290  | -0.474857 | 0.199633  |
| H  | 4.410905  | 1.734716  | 1.063584  |
| C  | 2.144612  | -5.693727 | -0.203792 |
| C  | 3.919566  | 2.523750  | 0.486307  |
| C  | 1.047162  | -5.629632 | 0.656493  |
| H  | 3.670417  | 0.045374  | -1.856889 |
| C  | 2.705597  | 4.542291  | -1.003624 |
| H  | 2.224365  | 5.328231  | -1.589921 |
| H  | 3.363451  | -4.619664 | -1.628150 |
| C  | 2.508766  | -4.574897 | -0.949451 |
| C  | 2.660177  | 2.295254  | -0.092673 |
| H  | 2.228467  | 0.604443  | 2.608370  |
| C  | 2.060817  | 3.316649  | -0.838069 |
| C  | 0.317748  | -4.449782 | 0.770831  |
| H  | -0.551750 | -4.414562 | 1.434700  |
| H  | 1.087986  | -1.810156 | 2.251826  |
| H  | 1.077515  | 3.169796  | -1.289365 |
| H  | 1.011543  | -0.473761 | 4.403986  |
| P  | 1.812886  | 0.696132  | 0.216504  |
| C  | 1.783127  | -3.389528 | -0.833406 |
| C  | 1.348018  | 0.864670  | 1.999859  |
| C  | 0.685049  | -3.314986 | 0.029136  |
| H  | 2.081389  | -2.513514 | -1.414367 |
| H  | 1.203395  | 1.943139  | 2.169289  |
| H  | 0.249230  | 1.127846  | 4.428643  |
| C  | 0.100127  | -1.369649 | 2.048551  |
| C  | 0.154114  | 0.106364  | 4.032819  |
| H  | -0.597413 | -1.951988 | 2.671267  |
| C  | 0.102154  | 0.105798  | 2.502106  |
| H  | -0.756296 | -0.333707 | 4.465084  |
| P  | -0.260484 | -1.766184 | 0.276490  |
| Ru | 0.080852  | 0.047445  | -1.150383 |
| H  | -2.595218 | -1.722202 | 2.230191  |
| H  | -1.857828 | 5.443789  | -2.197095 |
| H  | -2.143777 | 3.018258  | -1.810660 |
| C  | -1.515854 | 5.002976  | -1.258292 |
| C  | -1.675865 | 3.638766  | -1.038039 |
| C  | -1.188931 | 0.838403  | 2.088794  |
| C  | -2.901140 | -2.185820 | 1.289580  |
| H  | -1.275983 | 1.772576  | 2.664798  |
| C  | -1.990077 | -2.358028 | 0.239748  |
| H  | -0.801512 | 6.877099  | -0.450048 |
| C  | -0.928267 | 5.806238  | -0.278052 |
| H  | -2.060684 | 0.240377  | 2.393173  |
| P  | -1.434778 | 1.232152  | 0.293963  |
| C  | -1.254772 | 3.053649  | 0.167703  |
| H  | -4.919613 | -2.469140 | 1.987893  |
| C  | -4.221586 | -2.614921 | 1.160744  |
| C  | -0.513082 | 5.237140  | 0.922291  |
| C  | -0.676806 | 3.868534  | 1.146313  |
| C  | -2.425808 | -2.985332 | -0.938196 |
| H  | -0.056279 | 5.858507  | 1.695397  |
| H  | -1.727670 | -3.148197 | -1.762462 |
| H  | -0.342439 | 3.454498  | 2.100725  |
| C  | -4.645283 | -3.227247 | -0.016037 |
| C  | -3.237112 | 1.011840  | 0.081405  |

|   |           |           |           |
|---|-----------|-----------|-----------|
| C | -3.742092 | -3.417905 | -1.062634 |
| H | -3.072793 | -0.173029 | -1.719841 |
| H | -3.724839 | 2.179286  | 1.849566  |
| H | -5.679486 | -3.563452 | -0.116497 |
| C | -3.750852 | 0.283614  | -0.996624 |
| C | -4.113965 | 1.587839  | 1.014602  |
| H | -4.063992 | -3.909616 | -1.982932 |
| C | -5.131257 | 0.127420  | -1.131802 |
| C | -5.488590 | 1.421521  | 0.876168  |
| H | -5.526970 | -0.444968 | -1.973891 |
| H | -6.166075 | 1.872635  | 1.604340  |
| C | -5.998708 | 0.689575  | -0.198361 |
| H | -7.078214 | 0.564046  | -0.307582 |
| O | -1.282572 | -0.728144 | -2.676602 |
| C | -0.153689 | -1.227637 | -3.005054 |
| H | 0.057769  | -2.300063 | -2.792558 |
| H | 1.225172  | -0.763077 | -2.039142 |
| H | 0.375667  | -0.846357 | -3.902247 |
| H | 0.642726  | 1.240003  | -2.345332 |
| H | -0.135207 | 1.522052  | -2.128162 |

## XVII

|    |           |           |           |
|----|-----------|-----------|-----------|
| H  | -2.760618 | 6.268432  | -0.474472 |
| H  | -1.828785 | 5.486607  | 1.697233  |
| C  | -2.585788 | 5.204096  | -0.304040 |
| C  | -2.066501 | 4.766760  | 0.911214  |
| H  | -3.309712 | 4.608528  | -2.252879 |
| C  | -2.890015 | 4.274767  | -1.301499 |
| C  | -1.845270 | 3.406164  | 1.132930  |
| H  | -1.435364 | 3.096682  | 2.097550  |
| H  | -6.592879 | 0.226398  | 1.399578  |
| H  | -7.099085 | -1.411268 | -0.408351 |
| H  | 2.642766  | 6.649351  | -0.368482 |
| H  | 4.142955  | 5.208291  | 1.000901  |
| C  | -2.668690 | 2.918994  | -1.081767 |
| C  | -5.801998 | -0.106157 | 0.723991  |
| C  | -6.085570 | -1.022090 | -0.290917 |
| C  | -2.141384 | 2.466864  | 0.139423  |
| H  | -4.308747 | 1.130979  | 1.655025  |
| C  | 2.413820  | 5.589521  | -0.238778 |
| C  | -4.512478 | 0.396198  | 0.869547  |
| C  | 3.255395  | 4.782654  | 0.528334  |
| H  | -2.916693 | 2.197415  | -1.867868 |
| C  | -5.074022 | -1.432857 | -1.155133 |
| H  | -5.286427 | -2.151467 | -1.949794 |
| H  | 0.624373  | 5.664306  | -1.447730 |
| C  | 1.285661  | 5.039515  | -0.843390 |
| C  | -3.483315 | -0.020303 | 0.009188  |
| H  | -1.916757 | 1.218811  | 2.649025  |
| C  | -3.779066 | -0.936939 | -1.002703 |
| C  | 2.972272  | 3.428945  | 0.686636  |
| H  | 3.647327  | 2.801621  | 1.276383  |
| H  | 0.473115  | 2.068755  | 2.325774  |
| H  | -2.994118 | -1.297075 | -1.671287 |
| H  | -0.354371 | 0.966958  | 4.496763  |
| P  | -1.797486 | 0.667246  | 0.268366  |
| C  | 0.995148  | 3.685113  | -0.682667 |
| C  | -1.545134 | 0.352442  | 2.080223  |
| C  | 1.835397  | 2.867754  | 0.082396  |
| H  | 0.103780  | 3.267788  | -1.157650 |
| H  | -2.225749 | -0.470628 | 2.348020  |
| H  | -0.916615 | -0.715257 | 4.462574  |
| C  | 0.899018  | 1.072273  | 2.129237  |
| C  | -0.144379 | -0.030253 | 4.083837  |
| H  | 1.795671  | 1.019962  | 2.767249  |
| C  | -0.123039 | -0.004684 | 2.552768  |
| H  | 0.821773  | -0.360934 | 4.491944  |
| P  | 1.458701  | 1.099431  | 0.369800  |
| Ru | -0.031086 | 0.041957  | -1.078357 |
| H  | 3.060151  | -0.571762 | 2.330762  |
| H  | -2.406067 | -5.124560 | -2.270163 |
| H  | -0.498758 | -3.607583 | -1.849531 |
| C  | -2.365939 | -4.553298 | -1.340311 |
| C  | -1.295063 | -3.697050 | -1.102336 |
| C  | 0.282666  | -1.413550 | 2.076372  |
| C  | 3.621421  | -0.444536 | 1.402187  |
| H  | -0.313753 | -2.164902 | 2.616503  |
| C  | 3.113791  | 0.329577  | 0.350791  |
| H  | -4.216205 | -5.365414 | -0.572797 |
| C  | -3.377089 | -4.691673 | -0.387236 |
| H  | 1.322661  | -1.614328 | 2.373052  |
| P  | 0.183053  | -1.796041 | 0.265467  |
| C  | -1.218675 | -2.963966 | 0.092837  |
| H  | 5.246386  | -1.664045 | 2.119504  |
| C  | 4.867464  | -1.060485 | 1.292081  |
| C  | -3.307088 | -3.974554 | 0.804191  |
| C  | -2.234327 | -3.115609 | 1.043869  |
| C  | 3.890105  | 0.493786  | -0.808464 |
| H  | -4.093120 | -4.078340 | 1.555286  |
| H  | 3.514452  | 1.096099  | -1.636806 |
| H  | -2.210195 | -2.564285 | 1.986895  |
| C  | 5.625498  | -0.899525 | 0.134908  |
| C  | 1.634612  | -2.866282 | -0.020893 |



|   |           |           |           |
|---|-----------|-----------|-----------|
| C | 5.137629  | -0.113683 | -0.909747 |
| H | 2.278596  | -1.808590 | -1.797338 |
| H | 1.232701  | -4.128363 | 1.703738  |
| H | 6.602301  | -1.380555 | 0.049540  |
| C | 2.478229  | -2.637977 | -1.113440 |
| C | 1.899252  | -3.927902 | 0.858702  |
| H | 5.732813  | 0.027140  | -1.814428 |
| C | 3.585705  | -3.463395 | -1.314233 |
| C | 3.008052  | -4.743182 | 0.652270  |
| H | 4.245626  | -3.278952 | -2.164991 |
| H | 3.209806  | -5.569217 | 1.337609  |
| C | 3.853540  | -4.509697 | -0.434516 |
| H | 4.721951  | -5.152379 | -0.595402 |
| O | 1.485419  | -0.011067 | -2.556655 |
| C | 0.908584  | 1.108828  | -3.015446 |
| H | 1.523059  | 2.035212  | -2.944525 |
| H | -0.041101 | 1.452344  | -2.378393 |
| H | 0.454771  | 1.042859  | -4.028008 |
| H | -1.279454 | -0.549200 | -2.239825 |
| H | -0.682603 | -1.150176 | -2.246240 |

## XVIII

|    |           |           |           |
|----|-----------|-----------|-----------|
| H  | -6.649183 | -0.655998 | -1.002036 |
| H  | -5.074814 | -1.126691 | -2.874569 |
| C  | -5.622035 | -0.287413 | -0.962485 |
| C  | -4.742636 | -0.548713 | -2.009547 |
| H  | -5.875726 | 0.697075  | 0.945190  |
| C  | -5.186168 | 0.463546  | 0.130532  |
| C  | -3.430562 | -0.077346 | -1.960429 |
| H  | -2.769689 | -0.304476 | -2.799770 |
| H  | -3.039433 | 5.664825  | -1.989474 |
| H  | -2.292338 | 6.849552  | 0.072459  |
| H  | -4.421138 | -5.386164 | -0.856540 |
| H  | -4.623028 | -3.220960 | 0.358402  |
| C  | -3.878656 | 0.938348  | 0.174814  |
| C  | -2.502312 | 5.121858  | -1.208926 |
| C  | -2.086369 | 5.784514  | -0.052863 |
| C  | -2.975763 | 0.667309  | -0.865231 |
| H  | -2.596132 | 3.253615  | -2.267968 |
| C  | -3.575660 | -4.695746 | -0.822219 |
| C  | -2.244145 | 3.763502  | -1.365880 |
| C  | -3.687509 | -3.486147 | -0.140448 |
| H  | -3.562801 | 1.557319  | 1.019057  |
| C  | -1.413026 | 5.079855  | 0.941237  |
| H  | -1.080564 | 5.589011  | 1.848598  |
| H  | -2.284042 | -5.975305 | -1.991517 |
| C  | -2.378171 | -5.026866 | -1.458545 |
| C  | -1.553109 | 3.045170  | -0.375893 |
| H  | -1.445921 | 1.209560  | -3.100456 |
| C  | -1.147088 | 3.719910  | 0.777735  |
| C  | -2.607621 | -2.603982 | -0.093573 |
| H  | -2.702157 | -1.655458 | 0.439375  |
| H  | -1.012772 | -1.324229 | -2.861598 |
| H  | -0.594203 | 3.201435  | 1.565278  |
| H  | -0.248844 | 0.051098  | -4.858485 |
| P  | -1.238744 | 1.251272  | -0.664122 |
| C  | -1.295527 | -4.153239 | -1.408489 |
| C  | -0.592827 | 1.282526  | -2.408651 |
| C  | -1.401967 | -2.930847 | -0.724698 |
| H  | -0.356278 | -4.429459 | -1.897070 |
| H  | -0.188701 | 2.293392  | -2.568362 |
| H  | 0.910054  | 1.374986  | -4.628916 |
| C  | 0.016774  | -1.190439 | -2.497057 |
| C  | 0.664486  | 0.347763  | -4.322451 |
| H  | 0.611311  | -1.908978 | -3.082845 |
| C  | 0.478103  | 0.248573  | -2.805440 |
| H  | 1.479066  | -0.304939 | -4.668583 |
| P  | 0.018618  | -1.769998 | -0.737465 |
| Ru | 0.102129  | -0.000717 | 0.807480  |
| H  | 2.486800  | -2.336051 | -2.418637 |
| H  | 2.750211  | 4.751907  | 2.503976  |
| H  | 2.611805  | 2.337331  | 1.991950  |
| C  | 2.466360  | 4.428435  | 1.500105  |
| C  | 2.383891  | 3.070256  | 1.209903  |
| C  | 1.837184  | 0.561307  | -2.153333 |
| C  | 2.489108  | -2.962351 | -1.523421 |
| H  | 2.292803  | 1.442811  | -2.632098 |
| C  | 1.438089  | -2.909032 | -0.599860 |
| H  | 2.265640  | 6.440245  | 0.733556  |
| C  | 2.201407  | 5.373854  | 0.506982  |
| H  | 2.539188  | -0.260485 | -2.361376 |
| P  | 1.890676  | 0.814479  | -0.320682 |
| C  | 2.035556  | 2.630381  | -0.077767 |
| H  | 4.374292  | -3.859488 | -2.057569 |
| C  | 3.564478  | -3.828538 | -1.325814 |
| C  | 1.868074  | 4.950575  | -0.776527 |
| C  | 1.789982  | 3.587907  | -1.068329 |
| C  | 1.480051  | -3.748119 | 0.526183  |
| H  | 1.668533  | 5.682829  | -1.562042 |
| H  | 0.668549  | -3.718393 | 1.254792  |
| H  | 1.542529  | 3.288848  | -2.089519 |
| C  | 3.601343  | -4.649683 | -0.201799 |
| C  | 3.591477  | 0.261253  | 0.077294  |

|   |           |           |           |
|---|-----------|-----------|-----------|
| C | 2.554631  | -4.609982 | 0.720831  |
| H | 4.501325  | 1.962307  | -0.926854 |
| H | 2.986807  | -1.512411 | 1.145220  |
| H | 4.442933  | -5.328543 | -0.047468 |
| C | 4.675357  | 1.024641  | -0.389565 |
| C | 3.833470  | -0.926439 | 0.777711  |
| H | 2.573360  | -5.258910 | 1.598994  |
| C | 5.980650  | 0.598827  | -0.163036 |
| C | 5.146151  | -1.342387 | 1.005258  |
| H | 6.817337  | 1.198355  | -0.528010 |
| H | 5.327020  | -2.268099 | 1.556863  |
| C | 6.217690  | -0.586139 | 0.536512  |
| H | 7.243198  | -0.914670 | 0.719532  |
| O | 1.048439  | -1.370085 | 2.041470  |
| C | 1.585271  | -0.947850 | 3.236007  |
| H | 1.958373  | -1.813776 | 3.819110  |
| H | 2.457000  | -0.261291 | 3.122035  |
| H | -0.060845 | 1.483959  | 1.767022  |
| H | 0.556273  | 1.057908  | 2.166054  |
| H | 0.859568  | -0.422280 | 3.903078  |
| O | -1.645203 | -0.584492 | 2.238148  |
| C | -1.713723 | -1.836755 | 2.943245  |
| C | -2.131455 | 0.378078  | 3.179867  |
| C | -3.093777 | -1.794577 | 3.569647  |
| H | -1.542021 | -2.645736 | 2.224232  |
| H | -0.908262 | -1.873469 | 3.696051  |
| C | -3.316798 | -0.300110 | 3.857831  |
| H | -1.325674 | 0.611135  | 3.902191  |
| H | -2.368280 | 1.301496  | 2.633208  |
| H | -3.161309 | -2.423163 | 4.466649  |
| H | -3.842884 | -2.170315 | 2.856699  |
| H | -3.339893 | -0.074222 | 4.931970  |
| H | -4.270936 | 0.050681  | 3.441735  |

## XVIII-XXIV

|    |           |           |           |
|----|-----------|-----------|-----------|
| H  | 5.446966  | -3.899246 | -1.053177 |
| H  | 4.407327  | -2.829960 | -3.047012 |
| C  | 4.433286  | -3.497390 | -0.994806 |
| C  | 3.852295  | -2.897962 | -2.109032 |
| H  | 4.140871  | -4.088468 | 1.064265  |
| C  | 3.704445  | -3.597084 | 0.191544  |
| C  | 2.556420  | -2.385118 | -2.038126 |
| H  | 2.130722  | -1.933197 | -2.936654 |
| H  | -2.459784 | -5.899523 | -1.491888 |
| H  | -2.667765 | -6.499502 | 0.916158  |
| H  | 6.936656  | 1.315417  | -0.901731 |
| H  | 5.726611  | -0.617501 | 0.108816  |
| C  | 2.412158  | -3.086229 | 0.260365  |
| C  | -2.024883 | -5.253329 | -0.726274 |
| C  | -2.140531 | -5.589782 | 0.621255  |
| C  | 1.821260  | -2.460453 | -0.848532 |
| H  | -1.250608 | -3.872221 | -2.172513 |
| C  | 5.845891  | 1.316744  | -0.849016 |
| C  | -1.345593 | -4.097063 | -1.107611 |
| C  | 5.169183  | 0.235741  | -0.286131 |
| H  | 1.844850  | -3.190391 | 1.188924  |
| C  | -1.575685 | -4.760929 | 1.589602  |
| H  | -1.659157 | -5.016654 | 2.648278  |
| H  | 5.645452  | 3.260346  | -1.770598 |
| C  | 5.123550  | 2.405277  | -1.335794 |
| C  | -0.792390 | -3.245886 | -0.141569 |
| H  | 0.108226  | -1.989578 | -3.038400 |
| C  | -0.915929 | -3.595105 | 1.209185  |
| C  | 3.777131  | 0.236955  | -0.215108 |
| H  | 3.260697  | -0.601528 | 0.254890  |
| H  | 1.744227  | 0.079996  | -2.715947 |
| H  | -0.512580 | -2.930035 | 1.978388  |
| H  | 0.209404  | -0.343974 | -4.817815 |
| P  | 0.145598  | -1.731076 | -0.608819 |
| C  | 3.731715  | 2.412642  | -1.264118 |
| C  | -0.454936 | -1.370005 | -2.324052 |
| C  | 3.042394  | 1.324588  | -0.707309 |
| H  | 3.183726  | 3.280171  | -1.641032 |
| H  | -1.491332 | -1.736964 | -2.377012 |
| H  | -1.548652 | -0.420728 | -4.582572 |
| C  | 0.921197  | 0.768555  | -2.472930 |
| C  | -0.637533 | 0.124488  | -4.294954 |
| H  | 1.081183  | 1.635441  | -3.132500 |
| C  | -0.434014 | 0.106581  | -2.779196 |
| H  | -0.732671 | 1.153193  | -4.672256 |
| P  | 1.199394  | 1.294841  | -0.723801 |
| Ru | -0.040587 | 0.057454  | 0.819359  |
| H  | 0.671684  | 3.510904  | -2.786740 |
| H  | -4.509592 | -3.214133 | 1.626106  |
| H  | -2.831934 | -1.407814 | 1.621058  |
| C  | -4.353233 | -2.627919 | 0.717854  |
| C  | -3.407533 | -1.605158 | 0.713264  |
| C  | -1.579311 | 0.916531  | -2.132875 |
| C  | 0.589580  | 3.905323  | -1.770338 |
| H  | -2.507452 | 0.815216  | -2.712883 |
| C  | 0.788091  | 3.078670  | -0.655532 |
| H  | -5.820425 | -3.715883 | -0.436075 |
| C  | -5.086089 | -2.907584 | -0.433302 |
| H  | -1.338109 | 1.989759  | -2.186088 |
| P  | -1.944681 | 0.538258  | -0.365700 |
| C  | -3.179270 | -0.834677 | -0.434891 |
| H  | 0.120783  | 5.887107  | -2.478081 |
| C  | 0.276070  | 5.254375  | -1.601481 |
| C  | -4.878621 | -2.144685 | -1.581063 |
| C  | -3.941921 | -1.112396 | -1.579597 |
| C  | 0.676786  | 3.630628  | 0.629812  |
| H  | -5.454806 | -2.346829 | -2.486484 |
| H  | 0.800441  | 2.984924  | 1.505585  |
| H  | -3.819922 | -0.528498 | -2.494068 |
| C  | 0.166818  | 5.793677  | -0.319969 |
| C  | -3.007691 | 1.954932  | 0.128266  |

|   |           |           |           |
|---|-----------|-----------|-----------|
| C | 0.370294  | 4.979746  | 0.794267  |
| H | -4.435392 | 0.727474  | 1.208694  |
| H | -1.797414 | 3.482174  | -0.839241 |
| H | -0.078029 | 6.850279  | -0.190991 |
| C | -4.147027 | 1.740464  | 0.918613  |
| C | -2.677885 | 3.270408  | -0.230630 |
| H | 0.280271  | 5.394597  | 1.800852  |
| C | -4.930167 | 2.811847  | 1.341126  |
| C | -3.467741 | 4.339209  | 0.187591  |
| H | -5.814373 | 2.623833  | 1.953694  |
| H | -3.196588 | 5.354762  | -0.109787 |
| C | -4.592696 | 4.114911  | 0.978962  |
| H | -5.209857 | 4.953643  | 1.307631  |
| O | -0.303445 | 1.331852  | 2.641611  |
| C | -1.382881 | 2.150210  | 2.956525  |
| H | -1.240794 | 2.583993  | 3.963024  |
| H | -1.509482 | 2.995016  | 2.251562  |
| H | -0.977432 | -0.810974 | 2.113655  |
| H | -0.783311 | 0.004948  | 2.505635  |
| H | -2.350470 | 1.608649  | 2.977846  |
| O | 1.762979  | -0.366406 | 2.158806  |
| C | 2.544946  | 0.716308  | 2.714104  |
| C | 1.645736  | -1.285374 | 3.253475  |
| C | 3.666166  | 0.003669  | 3.447716  |
| H | 2.866315  | 1.362245  | 1.888722  |
| H | 1.893050  | 1.298394  | 3.384062  |
| C | 3.046381  | -1.349090 | 3.840101  |
| H | 0.909696  | -0.886341 | 3.975353  |
| H | 1.263339  | -2.237384 | 2.863504  |
| H | 4.014354  | 0.583406  | 4.312143  |
| H | 4.533358  | -0.138568 | 2.786843  |
| H | 3.020765  | -1.513344 | 4.925096  |
| H | 3.612453  | -2.184101 | 3.404097  |

**XXIV**

|    |           |           |           |
|----|-----------|-----------|-----------|
| H  | 2.540250  | -6.123699 | -1.333081 |
| H  | 1.861635  | -4.821554 | -3.344967 |
| C  | 1.903609  | -5.242784 | -1.227940 |
| C  | 1.524841  | -4.513476 | -2.352653 |
| H  | 1.728975  | -5.424638 | 0.918513  |
| C  | 1.451249  | -4.848654 | 0.032072  |
| C  | 0.708430  | -3.388691 | -2.221245 |
| H  | 0.432300  | -2.842142 | -3.126147 |
| H  | -5.177081 | -3.743352 | -1.691647 |
| H  | -5.642768 | -4.343323 | 0.679987  |
| H  | 6.832031  | -1.923315 | -0.296765 |
| H  | 4.931696  | -3.109045 | -1.395639 |
| C  | 0.637354  | -3.727246 | 0.161795  |
| C  | -4.470231 | -3.465556 | -0.906681 |
| C  | -4.730286 | -3.802392 | 0.420162  |
| C  | 0.262774  | -2.971898 | -0.959956 |
| H  | -3.119036 | -2.546010 | -2.293805 |
| C  | 5.866647  | -1.426421 | -0.413183 |
| C  | -3.304204 | -2.778338 | -1.242441 |
| C  | 4.804351  | -2.088191 | -1.027251 |
| H  | 0.277123  | -3.429502 | 1.150543  |
| C  | -3.816455 | -3.449472 | 1.412746  |
| H  | -4.010245 | -3.712428 | 2.455210  |
| H  | 6.518344  | 0.412177  | 0.515290  |
| C  | 5.689911  | -0.119854 | 0.042122  |
| C  | -2.392375 | -2.396945 | -0.249389 |
| H  | -1.032815 | -1.585741 | -3.091797 |
| C  | -2.661581 | -2.746966 | 1.079520  |
| C  | 3.571657  | -1.454167 | -1.174820 |
| H  | 2.749491  | -2.006509 | -1.634924 |
| H  | 1.418372  | -0.745220 | -2.722739 |
| H  | -1.968323 | -2.432326 | 1.864498  |
| H  | -0.120123 | -0.131120 | -4.804056 |
| P  | -0.823376 | -1.512851 | -0.647876 |
| C  | 4.460518  | 0.517922  | -0.112277 |
| C  | -1.173479 | -0.809309 | -2.325608 |
| C  | 3.380481  | -0.140802 | -0.723284 |
| H  | 4.346801  | 1.545875  | 0.244702  |
| H  | -2.249577 | -0.578171 | -2.347779 |
| H  | -1.656961 | 0.698329  | -4.483538 |
| C  | 1.126180  | 0.287072  | -2.470783 |
| C  | -0.588814 | 0.675219  | -4.220508 |
| H  | 1.691780  | 0.931588  | -3.162021 |
| C  | -0.390181 | 0.461207  | -2.718736 |
| H  | -0.142141 | 1.624769  | -4.549685 |
| P  | 1.711992  | 0.638581  | -0.744095 |
| Ru | -0.041862 | 0.013122  | 0.817065  |
| H  | 3.495683  | 2.091128  | -2.612965 |
| H  | -5.622737 | -0.547694 | 1.619792  |
| H  | -3.225327 | 0.063029  | 1.641506  |
| C  | -5.183163 | -0.057894 | 0.747855  |
| C  | -3.836141 | 0.295715  | 0.764765  |
| C  | -0.953165 | 1.708828  | -1.984758 |
| C  | 3.077192  | 2.827096  | -1.919139 |
| H  | -1.790580 | 2.135310  | -2.555984 |
| C  | 2.200868  | 2.415725  | -0.901087 |
| H  | -7.014559 | -0.091068 | -0.398943 |
| C  | -5.960769 | 0.195107  | -0.380402 |
| H  | -0.185001 | 2.498452  | -1.966828 |
| P  | -1.456304 | 1.398746  | -0.237618 |
| C  | -3.240421 | 0.914461  | -0.342641 |
| H  | 4.126579  | 4.465991  | -2.841887 |
| C  | 3.443090  | 4.163770  | -2.045415 |
| C  | -5.384291 | 0.816949  | -1.486274 |
| C  | -4.038729 | 1.181217  | -1.465088 |
| C  | 1.713333  | 3.379376  | -0.013875 |
| H  | -5.985044 | 1.026852  | -2.373894 |
| H  | 1.025526  | 3.075685  | 0.777410  |
| H  | -3.625845 | 1.674850  | -2.347660 |
| C  | 2.943301  | 5.115702  | -1.153432 |
| C  | -1.629993 | 3.067444  | 0.510874  |

|   |           |           |           |
|---|-----------|-----------|-----------|
| C | 2.078754  | 4.721372  | -0.135992 |
| H | -2.038213 | 2.191719  | 2.448898  |
| H | -1.302867 | 4.254301  | -1.277761 |
| H | 3.232814  | 6.163948  | -1.253021 |
| C | -1.903931 | 3.124831  | 1.888306  |
| C | -1.507674 | 4.264192  | -0.204489 |
| H | 1.681831  | 5.457434  | 0.567263  |
| C | -2.030748 | 4.351996  | 2.537750  |
| C | -1.639755 | 5.490836  | 0.447235  |
| H | -2.249677 | 4.381667  | 3.607555  |
| H | -1.542805 | 6.417201  | -0.123534 |
| C | -1.892529 | 5.539237  | 1.817095  |
| H | -1.993982 | 6.501906  | 2.322233  |
| O | 0.606716  | 1.408225  | 2.531441  |
| C | 1.958933  | 1.609609  | 2.906048  |
| H | 2.061598  | 2.484063  | 3.562342  |
| H | 2.299774  | 0.725877  | 3.459191  |
| H | -1.264699 | -0.356100 | 1.835486  |
| H | 2.608728  | 1.745799  | 2.024217  |
| O | 1.215196  | -1.305064 | 2.203181  |
| C | 0.628607  | -1.788552 | 3.427430  |
| C | 2.594650  | -1.717695 | 2.112391  |
| C | 1.582515  | -2.849765 | 3.925822  |
| H | 0.526025  | -0.943597 | 4.131430  |
| H | -0.384129 | -2.151015 | 3.201344  |
| C | 2.926029  | -2.304899 | 3.467734  |
| H | 2.687011  | -2.455379 | 1.297354  |
| H | 3.207114  | -0.845205 | 1.842903  |
| H | 1.371901  | -3.816357 | 3.440613  |
| H | 1.514672  | -3.007917 | 5.009577  |
| H | 3.717708  | -3.063167 | 3.414026  |
| H | 3.276574  | -1.520858 | 4.158032  |
| H | 0.125984  | 2.249193  | 2.522874  |

**XXIV-I'**

|    |           |           |           |
|----|-----------|-----------|-----------|
| H  | 2.996521  | -5.846057 | -0.992878 |
| H  | 1.588530  | -5.253928 | -2.958783 |
| C  | 2.270317  | -5.033524 | -0.921650 |
| C  | 1.484349  | -4.699510 | -2.023644 |
| H  | 2.726109  | -4.589757 | 1.142637  |
| C  | 2.117497  | -4.330237 | 0.272854  |
| C  | 0.553236  | -3.663982 | -1.937563 |
| H  | -0.060628 | -3.442547 | -2.813788 |
| H  | -5.180727 | -3.830263 | -1.300118 |
| H  | -5.491417 | -4.404430 | 1.102389  |
| H  | 6.931411  | -1.776995 | -0.588780 |
| H  | 5.023146  | -3.063037 | -1.552936 |
| C  | 1.195892  | -3.289963 | 0.355310  |
| C  | -4.425785 | -3.542341 | -0.565293 |
| C  | -4.599105 | -3.864126 | 0.779089  |
| C  | 0.408122  | -2.935547 | -0.748926 |
| H  | -3.175354 | -2.623246 | -2.044513 |
| C  | 5.938743  | -1.325977 | -0.649012 |
| C  | -3.287980 | -2.852064 | -0.982266 |
| C  | 4.872147  | -2.044684 | -1.186965 |
| H  | 1.088487  | -2.725460 | 1.284007  |
| C  | -3.625667 | -3.497957 | 1.709269  |
| H  | -3.752365 | -3.751743 | 2.764051  |
| H  | 6.562737  | 0.554398  | 0.211780  |
| C  | 5.731267  | -0.022487 | -0.199318 |
| C  | -2.316915 | -2.460763 | -0.051377 |
| H  | -0.997163 | -1.766979 | -2.956884 |
| C  | -2.495877 | -2.798532 | 1.296500  |
| C  | 3.604488  | -1.470513 | -1.264920 |
| H  | 2.786822  | -2.062566 | -1.684022 |
| H  | 1.417729  | -0.819413 | -2.753832 |
| H  | -1.750616 | -2.479848 | 2.030912  |
| H  | -0.199428 | -0.377076 | -4.774732 |
| P  | -0.790922 | -1.553134 | -0.526681 |
| C  | 4.466436  | 0.556501  | -0.281396 |
| C  | -1.169932 | -0.953218 | -2.237337 |
| C  | 3.382344  | -0.160626 | -0.812357 |
| H  | 4.326655  | 1.581632  | 0.072844  |
| H  | -2.253071 | -0.757559 | -2.268702 |
| H  | -1.748990 | 0.429836  | -4.455461 |
| C  | 1.089543  | 0.200751  | -2.493961 |
| C  | -0.674384 | 0.445509  | -4.220160 |
| H  | 1.620546  | 0.864358  | -3.194583 |
| C  | -0.433199 | 0.316041  | -2.715101 |
| H  | -0.262052 | 1.388354  | -4.607960 |
| P  | 1.685053  | 0.552348  | -0.777100 |
| Ru | -0.033933 | 0.022352  | 0.839310  |
| H  | 2.848927  | 2.489808  | -2.788537 |
| H  | -5.571531 | -0.574347 | 1.751931  |
| H  | -3.181803 | 0.065173  | 1.701918  |
| C  | -5.157616 | -0.104569 | 0.856709  |
| C  | -3.815184 | 0.265244  | 0.833434  |
| C  | -1.004552 | 1.583047  | -2.029830 |
| C  | 2.605724  | 3.029887  | -1.868817 |
| H  | -1.857653 | 1.974879  | -2.602075 |
| C  | 2.049853  | 2.354208  | -0.772668 |
| H  | -7.013823 | -0.190398 | -0.246925 |
| C  | -5.963275 | 0.107800  | -0.260368 |
| H  | -0.246458 | 2.380819  | -2.058686 |
| P  | -1.469476 | 1.345990  | -0.263604 |
| C  | -3.252387 | 0.860239  | -0.304569 |
| H  | 3.300480  | 4.911335  | -2.656266 |
| C  | 2.872855  | 4.394995  | -1.794038 |
| C  | -5.419673 | 0.705262  | -1.395974 |
| C  | -4.078327 | 1.085270  | -1.416223 |
| C  | 1.795107  | 3.072836  | 0.401655  |
| H  | -6.043316 | 0.884284  | -2.274505 |
| H  | 1.357841  | 2.558082  | 1.263598  |
| H  | -3.691884 | 1.560042  | -2.320766 |
| C  | 2.608358  | 5.100395  | -0.617912 |
| C  | -1.534609 | 3.037133  | 0.434770  |



|   |           |           |           |
|---|-----------|-----------|-----------|
| C | 2.076915  | 4.435829  | 0.484955  |
| H | -1.900322 | 2.251104  | 2.416579  |
| H | -1.196665 | 4.142147  | -1.407879 |
| H | 2.822957  | 6.169861  | -0.563098 |
| C | -1.756720 | 3.155388  | 1.815516  |
| C | -1.367007 | 4.198439  | -0.330147 |
| H | 1.866274  | 4.978747  | 1.409253  |
| C | -1.795820 | 4.408872  | 2.420415  |
| C | -1.409895 | 5.452127  | 0.278443  |
| H | -1.972006 | 4.488511  | 3.495533  |
| H | -1.277158 | 6.350569  | -0.328452 |
| C | -1.618935 | 5.560670  | 1.652168  |
| H | -1.651744 | 6.544594  | 2.124880  |
| H | -1.229143 | -0.240578 | 1.937536  |
| O | 1.327967  | -0.738770 | 2.453850  |
| C | 0.840099  | -1.406776 | 3.643591  |
| C | 2.773164  | -0.679894 | 2.470742  |
| C | 2.066868  | -2.028412 | 4.270429  |
| H | 0.363369  | -0.652431 | 4.292113  |
| H | 0.065428  | -2.124236 | 3.338580  |
| C | 3.158060  | -1.040288 | 3.886638  |
| H | 3.164265  | -1.397667 | 1.726562  |
| H | 3.075932  | 0.331064  | 2.158606  |
| H | 2.267937  | -3.016875 | 3.827150  |
| H | 1.961235  | -2.172258 | 5.352943  |
| H | 4.172775  | -1.451630 | 3.955404  |
| H | 3.118382  | -0.151374 | 4.535590  |
| H | 0.416083  | 2.167158  | 3.282544  |
| H | 0.782988  | 1.501816  | 3.282007  |

**XIX**

|    |           |           |           |
|----|-----------|-----------|-----------|
| H  | 6.330642  | -2.687291 | -0.896500 |
| H  | 5.354491  | -1.013132 | -2.465088 |
| C  | 5.257786  | -2.484197 | -0.884802 |
| C  | 4.711933  | -1.551039 | -1.764686 |
| H  | 4.840297  | -3.920078 | 0.674804  |
| C  | 4.424128  | -3.170150 | -0.001580 |
| C  | 3.343863  | -1.290530 | -1.746120 |
| H  | 2.945380  | -0.535765 | -2.429665 |
| H  | -0.419731 | -6.347444 | -1.595359 |
| H  | -1.574708 | -6.650258 | 0.588507  |
| H  | 6.349316  | 3.132551  | -0.652225 |
| H  | 5.658525  | 1.071796  | 0.566886  |
| C  | 3.053353  | -2.919974 | 0.005707  |
| C  | -0.487564 | -5.514344 | -0.892247 |
| C  | -1.131604 | -5.684646 | 0.335171  |
| C  | 2.494961  | -1.966523 | -0.859228 |
| H  | 0.596592  | -4.167892 | -2.177084 |
| C  | 5.303518  | 2.817782  | -0.654628 |
| C  | 0.077900  | -4.284218 | -1.219918 |
| C  | 4.916324  | 1.668538  | 0.030154  |
| H  | 2.407817  | -3.497977 | 0.672812  |
| C  | -1.201845 | -4.625019 | 1.237647  |
| H  | -1.702750 | -4.754859 | 2.199829  |
| H  | 4.645844  | 4.474099  | -1.878976 |
| C  | 4.349385  | 3.570146  | -1.342721 |
| C  | -0.008063 | -3.208131 | -0.325011 |
| H  | 1.115453  | -1.493235 | -3.152327 |
| C  | -0.643933 | -3.390180 | 0.908152  |
| C  | 3.580209  | 1.264927  | 0.029030  |
| H  | 3.286068  | 0.358540  | 0.561407  |
| H  | 1.596993  | 0.977126  | -2.947735 |
| H  | -0.714415 | -2.549540 | 1.607518  |
| H  | 0.450930  | 0.002381  | -4.936460 |
| P  | 0.702815  | -1.569001 | -0.753351 |
| C  | 3.014728  | 3.175568  | -1.338945 |
| C  | 0.226325  | -1.304462 | -2.531126 |
| C  | 2.615983  | 2.015512  | -0.653478 |
| H  | 2.273054  | 3.783534  | -1.866699 |
| H  | -0.487906 | -2.096414 | -2.806322 |
| H  | -1.153015 | -0.741017 | -4.782790 |
| C  | 0.603122  | 1.201527  | -2.528999 |
| C  | -0.522598 | 0.089134  | -4.432851 |
| H  | 0.298208  | 2.138015  | -3.021177 |
| C  | -0.365241 | 0.067485  | -2.909712 |
| H  | -0.989047 | 1.025072  | -4.772739 |
| P  | 0.843439  | 1.517872  | -0.716820 |
| Ru | -0.028185 | -0.027055 | 0.709633  |
| H  | -1.205895 | 3.226493  | -2.205596 |
| H  | -5.835361 | -2.318865 | 1.521914  |
| H  | -4.318456 | -0.390023 | 1.260660  |
| C  | -5.041049 | -2.357099 | 0.773409  |
| C  | -4.179574 | -1.270640 | 0.629243  |
| C  | -1.765463 | 0.281862  | -2.304615 |
| C  | -0.915200 | 3.718861  | -1.274294 |
| H  | -2.477600 | -0.405294 | -2.787587 |
| C  | 0.038566  | 3.145927  | -0.424587 |
| H  | -5.579855 | -4.326957 | 0.070773  |
| C  | -4.900773 | -3.479133 | -0.041214 |
| H  | -2.115584 | 1.292641  | -2.568012 |
| P  | -1.969722 | 0.105609  | -0.462980 |
| C  | -3.156962 | -1.293478 | -0.329891 |
| H  | -2.265598 | 5.361259  | -1.623053 |
| C  | -1.521878 | 4.931750  | -0.948161 |
| C  | -3.900106 | -3.506276 | -1.011973 |
| C  | -3.037443 | -2.422970 | -1.152752 |
| C  | 0.365292  | 3.816319  | 0.764718  |
| H  | -3.787366 | -4.374561 | -1.664995 |
| H  | 1.112350  | 3.389069  | 1.440952  |
| H  | -2.260685 | -2.470325 | -1.919137 |
| C  | -1.182422 | 5.590566  | 0.230957  |
| C  | -3.014662 | 1.533239  | 0.007952  |

|   |           |           |           |
|---|-----------|-----------|-----------|
| C | -0.235514 | 5.028848  | 1.088609  |
| H | -4.407307 | 1.282955  | -1.638488 |
| H | -1.823768 | 2.021367  | 1.743174  |
| H | -1.654831 | 6.542515  | 0.482706  |
| C | -4.138995 | 1.874610  | -0.757384 |
| C | -2.706054 | 2.282859  | 1.148423  |
| H | 0.041469  | 5.541835  | 2.012172  |
| C | -4.931931 | 2.960127  | -0.392835 |
| C | -3.505876 | 3.363793  | 1.515499  |
| H | -5.805592 | 3.220782  | -0.994112 |
| H | -3.254343 | 3.946012  | 2.404845  |
| C | -4.615763 | 3.705381  | 0.744368  |
| H | -5.240755 | 4.554179  | 1.030700  |
| O | -0.830225 | -0.249282 | 2.508290  |
| C | -2.070529 | -0.510776 | 3.057424  |
| H | -2.010222 | -0.523609 | 4.161144  |
| H | -2.837533 | 0.243217  | 2.789859  |
| H | -2.471832 | -1.496300 | 2.746113  |
| O | 1.771764  | -0.186122 | 2.105820  |
| C | 2.047271  | 0.935356  | 2.961576  |
| C | 1.881177  | -1.340088 | 2.954786  |
| C | 3.141357  | 0.450147  | 3.911516  |
| H | 2.348811  | 1.770339  | 2.312987  |
| H | 1.116189  | 1.208061  | 3.487947  |
| C | 3.157678  | -1.074407 | 3.721273  |
| H | 0.990291  | -1.391320 | 3.603516  |
| H | 1.894812  | -2.226335 | 2.307709  |
| H | 2.914612  | 0.735987  | 4.947126  |
| H | 4.114978  | 0.896266  | 3.667775  |
| H | 3.202118  | -1.628430 | 4.667453  |
| H | 4.025844  | -1.384634 | 3.120211  |

**XX**

|    |           |           |           |
|----|-----------|-----------|-----------|
| H  | 2.236081  | -6.269308 | 1.033754  |
| H  | 2.674546  | -5.270254 | -1.204190 |
| C  | 1.680097  | -5.386855 | 0.709679  |
| C  | 1.923088  | -4.830580 | -0.544513 |
| H  | 0.528000  | -5.246463 | 2.533332  |
| C  | 0.725425  | -4.813099 | 1.550511  |
| C  | 1.210681  | -3.707578 | -0.963748 |
| H  | 1.432230  | -3.283264 | -1.946773 |
| H  | -4.371484 | -4.632225 | -1.928335 |
| H  | -6.016542 | -3.776934 | -0.263883 |
| H  | 5.618046  | -4.018570 | 0.989955  |
| H  | 3.791818  | -3.316036 | 2.531388  |
| C  | 0.014301  | -3.691707 | 1.134012  |
| C  | -4.089350 | -3.833994 | -1.238412 |
| C  | -5.009376 | -3.356311 | -0.302958 |
| C  | 0.243993  | -3.130764 | -0.132416 |
| H  | -2.086549 | -3.704248 | -2.008039 |
| C  | 4.917010  | -3.237281 | 0.688107  |
| C  | -2.803931 | -3.302747 | -1.285224 |
| C  | 3.896759  | -2.842751 | 1.552681  |
| H  | -0.739443 | -3.250347 | 1.795359  |
| C  | -4.634849 | -2.348452 | 0.581862  |
| H  | -5.351454 | -1.969506 | 1.315185  |
| H  | 5.848952  | -2.931769 | -1.237724 |
| C  | 5.044895  | -2.631404 | -0.562399 |
| C  | -2.426007 | -2.274636 | -0.405483 |
| H  | -0.097783 | -2.299160 | -2.809723 |
| C  | -3.350607 | -1.804943 | 0.531782  |
| C  | 2.999261  | -1.849404 | 1.165821  |
| H  | 2.189772  | -1.549343 | 1.841107  |
| H  | 2.135777  | -1.099849 | -2.660304 |
| H  | -3.066597 | -1.000097 | 1.209059  |
| H  | 0.816719  | -1.112279 | -4.742523 |
| P  | -0.710935 | -1.618221 | -0.536144 |
| C  | 4.153023  | -1.633176 | -0.948492 |
| C  | -0.551919 | -1.396024 | -2.373824 |
| C  | 3.117669  | -1.239644 | -0.089273 |
| H  | 4.281011  | -1.147519 | -1.920895 |
| H  | -1.576725 | -1.374900 | -2.775479 |
| H  | -0.755562 | -0.296420 | -4.832495 |
| C  | 1.660658  | -0.147317 | -2.374507 |
| C  | 0.254590  | -0.230460 | -4.403195 |
| H  | 2.222020  | 0.638047  | -2.904961 |
| C  | 0.205912  | -0.155105 | -2.874305 |
| H  | 0.740886  | 0.657322  | -4.832193 |
| P  | 1.952339  | 0.091318  | -0.554265 |
| Ru | 0.078316  | 0.102750  | 0.739898  |
| H  | 1.588151  | 2.803396  | -1.595914 |
| H  | -5.418673 | 2.265470  | 1.285708  |
| H  | -2.957822 | 2.464040  | 1.096562  |
| C  | -4.898747 | 1.783263  | 0.454466  |
| C  | -3.515023 | 1.891065  | 0.349637  |
| C  | -0.528593 | 1.150946  | -2.505365 |
| C  | 2.563258  | 2.773244  | -1.104635 |
| H  | -1.438639 | 1.245275  | -3.117570 |
| C  | 3.029818  | 1.582660  | -0.530168 |
| H  | -6.708290 | 0.997755  | -0.428165 |
| C  | -5.622014 | 1.076938  | -0.507833 |
| H  | 0.099822  | 2.007942  | -2.795973 |
| P  | -1.001050 | 1.386815  | -0.730997 |
| C  | -2.831188 | 1.287389  | -0.716855 |
| H  | 2.943229  | 4.852571  | -1.515776 |
| C  | 3.327982  | 3.936009  | -1.063024 |
| C  | -4.954613 | 0.482214  | -1.576334 |
| C  | -3.568565 | 0.583550  | -1.677901 |
| C  | 4.294507  | 1.579675  | 0.074477  |
| H  | -5.512716 | -0.071071 | -2.334695 |
| H  | 4.689983  | 0.666173  | 0.524860  |
| H  | -3.071328 | 0.095332  | -2.519873 |
| C  | 4.579078  | 3.924440  | -0.447192 |
| C  | -0.725669 | 3.168495  | -0.400402 |

|   |           |          |           |
|---|-----------|----------|-----------|
| C | 5.061425  | 2.742962 | 0.113271  |
| H | -1.547102 | 3.830616 | -2.299203 |
| H | 0.119287  | 2.824119 | 1.558836  |
| H | 5.181484  | 4.834453 | -0.411638 |
| C | -1.082359 | 4.131642 | -1.355072 |
| C | -0.163061 | 3.576160 | 0.814208  |
| H | 6.045361  | 2.722972 | 0.586514  |
| C | -0.856499 | 5.482752 | -1.102443 |
| C | 0.052158  | 4.930667 | 1.067509  |
| H | -1.133464 | 6.228237 | -1.850919 |
| H | 0.493451  | 5.241423 | 2.016975  |
| C | -0.287220 | 5.883037 | 0.108014  |
| H | -0.112942 | 6.943210 | 0.303697  |
| O | 1.057506  | 0.735141 | 2.428110  |
| C | 2.321279  | 1.264452 | 2.686429  |
| H | 3.132263  | 0.600976 | 2.335313  |
| H | 2.470461  | 2.249628 | 2.204477  |
| H | 2.464981  | 1.401684 | 3.771993  |
| O | -1.640095 | 0.175215 | 2.162735  |
| O | -0.815697 | 1.103697 | 4.020650  |
| H | 0.052588  | 0.993612 | 3.451665  |
| C | -1.787971 | 0.635182 | 3.308528  |
| C | -3.135723 | 0.697293 | 3.941504  |
| H | -3.441236 | 1.748771 | 4.034873  |
| H | -3.882319 | 0.159210 | 3.349634  |
| H | -3.096676 | 0.296412 | 4.961447  |

**XX-XXI**

|    |           |           |           |
|----|-----------|-----------|-----------|
| H  | 1.981317  | -6.310591 | 1.107794  |
| H  | 2.440087  | -5.381056 | -1.155363 |
| C  | 1.455469  | -5.416067 | 0.766924  |
| C  | 1.710214  | -4.898242 | -0.501660 |
| H  | 0.321934  | -5.193013 | 2.594000  |
| C  | 0.527996  | -4.789521 | 1.600358  |
| C  | 1.036831  | -3.759871 | -0.942661 |
| H  | 1.266875  | -3.365254 | -1.936282 |
| H  | -4.638637 | -4.360307 | -1.959363 |
| H  | -6.198489 | -3.482309 | -0.226546 |
| H  | 5.422875  | -4.245522 | 1.045129  |
| H  | 3.671468  | -3.375764 | 2.588402  |
| C  | -0.145603 | -3.652860 | 1.162882  |
| C  | -4.300041 | -3.602291 | -1.249778 |
| C  | -5.172102 | -3.112133 | -0.275709 |
| C  | 0.097335  | -3.130695 | -0.118061 |
| H  | -2.313165 | -3.546606 | -2.066078 |
| C  | 4.759092  | -3.440623 | 0.722009  |
| C  | -2.990584 | -3.134886 | -1.311306 |
| C  | 3.780847  | -2.952643 | 1.587504  |
| H  | -0.878882 | -3.168844 | 1.817483  |
| C  | -4.725424 | -2.158069 | 0.635036  |
| H  | -5.403511 | -1.771700 | 1.400388  |
| H  | 5.664470  | -3.271823 | -1.232823 |
| C  | 4.892454  | -2.898133 | -0.556678 |
| C  | -2.541231 | -2.159877 | -0.404752 |
| H  | -0.215630 | -2.298908 | -2.817349 |
| C  | -3.416352 | -1.679170 | 0.574164  |
| C  | 2.932067  | -1.928203 | 1.172947  |
| H  | 2.158301  | -1.555151 | 1.854146  |
| H  | 2.067103  | -1.209604 | -2.696929 |
| H  | -3.067924 | -0.921789 | 1.276768  |
| H  | 0.719683  | -1.146536 | -4.766469 |
| P  | -0.798365 | -1.592779 | -0.546269 |
| C  | 4.047716  | -1.870677 | -0.971414 |
| C  | -0.628042 | -1.375699 | -2.381421 |
| C  | 3.054276  | -1.382639 | -0.111453 |
| H  | 4.180720  | -1.437401 | -1.967501 |
| H  | -1.651831 | -1.307718 | -2.780327 |
| H  | -0.812066 | -0.254825 | -4.831332 |
| C  | 1.643344  | -0.234397 | -2.407049 |
| C  | 0.205779  | -0.240155 | -4.415706 |
| H  | 2.236096  | 0.522468  | -2.944754 |
| C  | 0.182522  | -0.169938 | -2.885966 |
| H  | 0.728920  | 0.624922  | -4.847600 |
| P  | 1.950878  | -0.005957 | -0.591222 |
| Ru | 0.080770  | 0.078899  | 0.720975  |
| H  | 1.688665  | 2.746968  | -1.563744 |
| H  | -5.281047 | 2.347119  | 1.405902  |
| H  | -2.819982 | 2.477529  | 1.178223  |
| C  | -4.792247 | 1.885647  | 0.544799  |
| C  | -3.408162 | 1.954460  | 0.418561  |
| C  | -0.481140 | 1.169920  | -2.501033 |
| C  | 2.671543  | 2.659474  | -1.095762 |
| H  | -1.387205 | 1.318560  | -3.108289 |
| C  | 3.094746  | 1.435509  | -0.558549 |
| H  | -6.640541 | 1.192117  | -0.334024 |
| C  | -5.553964 | 1.241865  | -0.431680 |
| H  | 0.192036  | 1.993198  | -2.788808 |
| P  | -0.934892 | 1.427794  | -0.724941 |
| C  | -2.764275 | 1.374296  | -0.685232 |
| H  | 3.138661  | 4.728334  | -1.468399 |
| C  | 3.489375  | 3.785172  | -1.043557 |
| C  | -4.925618 | 0.670605  | -1.536011 |
| C  | -3.539103 | 0.732950  | -1.660457 |
| C  | 4.368726  | 1.362159  | 0.022052  |
| H  | -5.514900 | 0.166182  | -2.304774 |
| H  | 4.730387  | 0.422256  | 0.445847  |
| H  | -3.072816 | 0.265032  | -2.531163 |
| C  | 4.749809  | 3.703431  | -0.452290 |
| C  | -0.603638 | 3.200045  | -0.406981 |

|   |           |          |           |
|---|-----------|----------|-----------|
| C | 5.187855  | 2.489031 | 0.072934  |
| H | -1.297291 | 3.868163 | -2.355275 |
| H | 0.105607  | 2.856059 | 1.604889  |
| H | 5.393257  | 4.584456 | -0.407830 |
| C | -0.873622 | 4.162874 | -1.390318 |
| C | -0.097275 | 3.604066 | 0.833038  |
| H | 6.178091  | 2.414209 | 0.527248  |
| C | -0.614875 | 5.508342 | -1.139370 |
| C | 0.151126  | 4.953116 | 1.083897  |
| H | -0.825110 | 6.253443 | -1.909626 |
| H | 0.544218  | 5.260039 | 2.055420  |
| C | -0.099460 | 5.904194 | 0.096325  |
| H | 0.099705  | 6.960215 | 0.290413  |
| O | 1.147798  | 0.792584 | 2.422965  |
| C | 2.399272  | 1.377869 | 2.687179  |
| H | 3.210441  | 0.691056 | 2.400706  |
| H | 2.538825  | 2.324390 | 2.136200  |
| H | 2.495818  | 1.584341 | 3.763409  |
| O | -1.551951 | 0.128790 | 2.161292  |
| O | -0.716601 | 1.326265 | 3.858136  |
| H | 0.369303  | 1.087258 | 3.149537  |
| C | -1.659151 | 0.726575 | 3.278345  |
| C | -3.001846 | 0.721140 | 3.945871  |
| H | -3.335703 | 1.756343 | 4.098204  |
| H | -3.755374 | 0.175529 | 3.368060  |
| H | -2.914741 | 0.280311 | 4.947103  |

# XXI

|    |           |           |           |
|----|-----------|-----------|-----------|
| H  | 1.376387  | -6.458055 | 1.117041  |
| H  | 1.931578  | -5.588181 | -1.147827 |
| C  | 0.935510  | -5.521810 | 0.767791  |
| C  | 1.244651  | -5.036845 | -0.501816 |
| H  | -0.185930 | -5.187047 | 2.585154  |
| C  | 0.062487  | -4.809469 | 1.590996  |
| C  | 0.680055  | -3.844988 | -0.954332 |
| H  | 0.948447  | -3.480121 | -1.949739 |
| H  | -5.008676 | -3.892850 | -2.070221 |
| H  | -6.508828 | -2.888793 | -0.352946 |
| H  | 4.975403  | -4.732991 | 1.104104  |
| H  | 3.301981  | -3.689543 | 2.626028  |
| C  | -0.502202 | -3.618697 | 1.143305  |
| C  | -4.612948 | -3.176271 | -1.347279 |
| C  | -5.451782 | -2.615504 | -0.382206 |
| C  | -0.203449 | -3.128773 | -0.138872 |
| H  | -2.616646 | -3.300412 | -2.131674 |
| C  | 4.397310  | -3.868116 | 0.771452  |
| C  | -3.264509 | -2.833356 | -1.383168 |
| C  | 3.462842  | -3.283191 | 1.625184  |
| H  | -1.191632 | -3.064916 | 1.789968  |
| C  | -4.932773 | -1.715678 | 0.545128  |
| H  | -5.582927 | -1.274504 | 1.305220  |
| H  | 5.336124  | -3.796691 | -1.173418 |
| C  | 4.597121  | -3.346291 | -0.507206 |
| C  | -2.740378 | -1.912969 | -0.459629 |
| H  | -0.412704 | -2.249747 | -2.846486 |
| C  | -3.584131 | -1.361135 | 0.509534  |
| C  | 2.724628  | -2.181152 | 1.198322  |
| H  | 1.988353  | -1.728780 | 1.873775  |
| H  | 1.971103  | -1.387442 | -2.686881 |
| H  | -3.175436 | -0.653582 | 1.230237  |
| H  | 0.650665  | -1.169382 | -4.772489 |
| P  | -0.948507 | -1.516222 | -0.574076 |
| C  | 3.861052  | -2.243319 | -0.934737 |
| C  | -0.734916 | -1.295058 | -2.402117 |
| C  | 2.911879  | -1.656540 | -0.086983 |
| H  | 4.045399  | -1.829532 | -1.930889 |
| H  | -1.742853 | -1.118635 | -2.809085 |
| H  | -0.788265 | -0.134552 | -4.836177 |
| C  | 1.640450  | -0.376882 | -2.396582 |
| C  | 0.223043  | -0.222265 | -4.413681 |
| H  | 2.305837  | 0.321120  | -2.929065 |
| C  | 0.195302  | -0.168994 | -2.883170 |
| H  | 0.829798  | 0.593771  | -4.831363 |
| P  | 1.951815  | -0.180421 | -0.578328 |
| Ru | 0.082628  | 0.042932  | 0.722499  |
| H  | 1.983528  | 2.575316  | -1.579309 |
| H  | -4.964253 | 2.784060  | 1.512068  |
| H  | -2.504856 | 2.650445  | 1.270910  |
| C  | -4.533442 | 2.309458  | 0.627377  |
| C  | -3.150481 | 2.232667  | 0.491023  |
| C  | -0.337345 | 1.224128  | -2.485264 |
| C  | 2.939902  | 2.398053  | -1.082946 |
| H  | -1.225122 | 1.464967  | -3.089830 |
| C  | 3.228567  | 1.143394  | -0.527684 |
| H  | -6.451298 | 1.861383  | -0.262076 |
| C  | -5.366378 | 1.796540  | -0.368658 |
| H  | 0.413301  | 1.977689  | -2.771567 |
| P  | -0.755564 | 1.521446  | -0.705660 |
| C  | -2.581312 | 1.640598  | -0.647273 |
| H  | 3.613408  | 4.409816  | -1.453270 |
| C  | 3.860118  | 3.440719  | -1.013941 |
| C  | -4.810393 | 1.207695  | -1.501899 |
| C  | -3.425737 | 1.127538  | -1.639896 |
| C  | 4.473850  | 0.952658  | 0.087769  |
| H  | -5.455530 | 0.801297  | -2.283791 |
| H  | 4.732199  | -0.014847 | 0.525225  |
| H  | -3.018165 | 0.648957  | -2.534120 |
| C  | 5.090678  | 3.243057  | -0.387913 |
| C  | -0.258319 | 3.256812  | -0.400477 |



|   |           |           |           |
|---|-----------|-----------|-----------|
| C | 5.395811  | 1.996294  | 0.155266  |
| H | -0.724532 | 3.955964  | -2.406810 |
| H | 0.222212  | 2.893356  | 1.672670  |
| H | 5.814546  | 4.058510  | -0.330907 |
| C | -0.349012 | 4.222021  | -1.414350 |
| C | 0.182342  | 3.635719  | 0.872031  |
| H | 6.362192  | 1.830203  | 0.636026  |
| C | 0.026674  | 5.539094  | -1.160219 |
| C | 0.551484  | 4.956356  | 1.124074  |
| H | -0.045767 | 6.285260  | -1.954367 |
| H | 0.890749  | 5.242086  | 2.121995  |
| C | 0.483200  | 5.906457  | 0.106836  |
| H | 0.775654  | 6.940255  | 0.302330  |
| O | 1.182069  | 0.784857  | 2.444832  |
| C | 2.442461  | 1.367178  | 2.700055  |
| H | 3.232431  | 0.638967  | 2.472129  |
| H | 2.613010  | 2.271160  | 2.090712  |
| H | 2.521173  | 1.635903  | 3.762703  |
| O | -1.493328 | 0.021880  | 2.180803  |
| O | -0.860719 | 1.595751  | 3.646336  |
| H | 0.440637  | 1.200680  | 3.025701  |
| C | -1.684186 | 0.768288  | 3.207412  |
| C | -3.014726 | 0.598852  | 3.883165  |
| H | -3.816111 | 0.925359  | 3.204385  |
| H | -3.201182 | -0.462130 | 4.094362  |
| H | -3.069366 | 1.177631  | 4.810262  |

**XXII**

|    |           |           |           |
|----|-----------|-----------|-----------|
| H  | 3.977142  | -5.446254 | 0.769971  |
| H  | 3.972682  | -4.338588 | -1.460332 |
| C  | 3.180053  | -4.747455 | 0.506774  |
| C  | 3.176030  | -4.131853 | -0.742169 |
| H  | 2.154705  | -4.954415 | 2.399509  |
| C  | 2.161084  | -4.470194 | 1.420627  |
| C  | 2.155815  | -3.242597 | -1.081133 |
| H  | 2.184283  | -2.767743 | -2.065454 |
| H  | -2.838336 | -5.859074 | -1.400007 |
| H  | -4.799112 | -5.170905 | -0.027826 |
| H  | 6.970304  | -2.024817 | 0.452306  |
| H  | 5.120395  | -2.317230 | 2.097393  |
| C  | 1.143020  | -3.582423 | 1.086019  |
| C  | -2.831527 | -4.900677 | -0.876502 |
| C  | -3.929977 | -4.514210 | -0.105924 |
| C  | 1.129398  | -2.959435 | -0.172777 |
| H  | -0.851751 | -4.393544 | -1.555303 |
| C  | 6.001961  | -1.550167 | 0.280372  |
| C  | -1.717807 | -4.071189 | -0.968170 |
| C  | 4.969659  | -1.711154 | 1.201353  |
| H  | 0.348512  | -3.372004 | 1.810196  |
| C  | -3.911531 | -3.294712 | 0.566574  |
| H  | -4.769504 | -2.987641 | 1.169912  |
| H  | 6.604521  | -0.631767 | -1.581575 |
| C  | 5.796398  | -0.773854 | -0.860927 |
| C  | -1.698107 | -2.836748 | -0.298833 |
| H  | 0.382817  | -2.258236 | -2.784647 |
| C  | -2.801943 | -2.454793 | 0.468756  |
| C  | 3.731796  | -1.108067 | 0.980206  |
| H  | 2.932223  | -1.263694 | 1.707963  |
| H  | 2.387523  | -0.559266 | -2.606407 |
| H  | -2.798754 | -1.487575 | 0.971811  |
| H  | 1.137352  | -0.945415 | -4.665906 |
| P  | -0.224595 | -1.762060 | -0.479310 |
| C  | 4.562330  | -0.168039 | -1.079303 |
| C  | -0.199844 | -1.452606 | -2.311833 |
| C  | 3.510152  | -0.338339 | -0.164630 |
| H  | 4.426693  | 0.456308  | -1.967641 |
| H  | -1.230192 | -1.621363 | -2.658680 |
| H  | -0.575261 | -0.504741 | -4.801975 |
| C  | 1.702664  | 0.256108  | -2.324271 |
| C  | 0.386648  | -0.201164 | -4.363910 |
| H  | 2.075423  | 1.147912  | -2.854511 |
| C  | 0.292083  | -0.089136 | -2.838787 |
| H  | 0.670494  | 0.758707  | -4.819174 |
| P  | 1.917215  | 0.517255  | -0.497704 |
| Ru | 0.034407  | 0.118265  | 0.752563  |
| H  | 1.189471  | 3.068022  | -1.902638 |
| H  | -5.876773 | 0.656629  | 1.036785  |
| H  | -3.570430 | 1.517009  | 1.014949  |
| C  | -5.217473 | 0.405550  | 0.202642  |
| C  | -3.915939 | 0.898633  | 0.185998  |
| C  | -0.702000 | 1.053135  | -2.535253 |
| C  | 1.856807  | 3.300059  | -1.069186 |
| H  | -1.569088 | 0.988064  | -3.209449 |
| C  | 2.420773  | 2.272447  | -0.302460 |
| H  | -6.703554 | -0.781624 | -0.825300 |
| C  | -5.681814 | -0.396361 | -0.840413 |
| H  | -0.215437 | 2.003422  | -2.799663 |
| P  | -1.315347 | 1.198836  | -0.803775 |
| C  | -3.050859 | 0.595897  | -0.878016 |
| H  | 1.689194  | 5.423247  | -1.401058 |
| C  | 2.136968  | 4.637404  | -0.788728 |
| C  | -4.837250 | -0.694080 | -1.906197 |
| C  | -3.533025 | -0.201579 | -1.925210 |
| C  | 3.280475  | 2.615421  | 0.753480  |
| H  | -5.190719 | -1.313992 | -2.732752 |
| H  | 3.727449  | 1.829278  | 1.368382  |
| H  | -2.902944 | -0.452783 | -2.780723 |
| C  | 2.987815  | 4.965697  | 0.265141  |
| C  | -1.537426 | 2.993416  | -0.508382 |

|   |           |           |           |
|---|-----------|-----------|-----------|
| C | 3.562732  | 3.950477  | 1.031519  |
| H | -1.472406 | 3.658380  | -2.577208 |
| H | -1.735635 | 2.657974  | 1.615195  |
| H | 3.210530  | 6.011883  | 0.484506  |
| C | -1.568027 | 3.952766  | -1.528906 |
| C | -1.712873 | 3.410599  | 0.820645  |
| H | 4.239179  | 4.200037  | 1.851849  |
| C | -1.735497 | 5.302303  | -1.221851 |
| C | -1.881277 | 4.760665  | 1.124443  |
| H | -1.759004 | 6.040071  | -2.026902 |
| H | -2.020671 | 5.071314  | 2.162718  |
| C | -1.881432 | 5.710639  | 0.103466  |
| H | -2.010143 | 6.768953  | 0.339097  |
| O | 0.622868  | 1.895179  | 2.084708  |
| C | 0.240909  | 2.020434  | 3.446371  |
| H | 0.886788  | 2.746770  | 3.959542  |
| H | -0.813019 | 2.320785  | 3.560431  |
| H | 0.372876  | 1.038650  | 3.915061  |
| O | -0.776970 | -1.396591 | 3.390121  |
| O | -1.679816 | 0.148460  | 2.046467  |
| C | -1.699340 | -0.632736 | 3.075157  |
| H | 0.591857  | 2.760013  | 1.648910  |
| H | 0.450861  | -0.913608 | 2.287190  |
| H | 1.175200  | -0.682198 | 1.880143  |
| C | -2.967700 | -0.582477 | 3.880128  |
| H | -3.743028 | -1.159251 | 3.354296  |
| H | -2.829031 | -1.024687 | 4.871622  |
| H | -3.342749 | 0.444848  | 3.968709  |

**XXII-XXIII**

|    |           |           |           |
|----|-----------|-----------|-----------|
| H  | 5.046873  | -4.523690 | 0.502307  |
| H  | 4.733408  | -3.368371 | -1.681161 |
| C  | 4.112279  | -4.000750 | 0.287907  |
| C  | 3.936531  | -3.357617 | -0.934209 |
| H  | 3.215367  | -4.486713 | 2.194506  |
| C  | 3.088174  | -3.977206 | 1.236872  |
| C  | 2.741081  | -2.693038 | -1.210605 |
| H  | 2.634523  | -2.193812 | -2.177186 |
| H  | -1.507889 | -6.370924 | -1.275010 |
| H  | -3.630941 | -6.057418 | -0.011734 |
| H  | 7.184386  | -0.682027 | 0.472522  |
| H  | 5.414946  | -1.309282 | 2.111483  |
| C  | 1.897660  | -3.310715 | 0.964244  |
| C  | -1.727917 | -5.410988 | -0.803030 |
| C  | -2.917624 | -5.234534 | -0.094186 |
| C  | 1.709584  | -2.660047 | -0.265659 |
| H  | 0.125884  | -4.523649 | -1.443214 |
| C  | 6.145870  | -0.393073 | 0.297134  |
| C  | -0.812179 | -4.367374 | -0.901376 |
| C  | 5.157229  | -0.741283 | 1.214702  |
| H  | 1.100537  | -3.302288 | 1.714792  |
| C  | -3.188504 | -4.009407 | 0.510382  |
| H  | -4.118750 | -3.863604 | 1.065492  |
| H  | 6.577561  | 0.620432  | -1.563003 |
| C  | 5.806130  | 0.332737  | -0.845475 |
| C  | -1.082010 | -3.127440 | -0.299061 |
| H  | 0.714708  | -2.125582 | -2.830904 |
| C  | -2.277479 | -2.957555 | 0.407026  |
| C  | 3.830531  | -0.375025 | 0.990121  |
| H  | 3.061456  | -0.665930 | 1.709588  |
| H  | 2.416542  | -0.044991 | -2.610292 |
| H  | -2.504658 | -1.994755 | 0.866419  |
| H  | 1.263947  | -0.659887 | -4.666090 |
| P  | 0.126866  | -1.759428 | -0.496556 |
| C  | 4.482330  | 0.701367  | -1.069278 |
| C  | 0.029692  | -1.429598 | -2.322179 |
| C  | 3.477738  | 0.340496  | -0.157179 |
| H  | 4.236570  | 1.288977  | -1.959179 |
| H  | -0.974132 | -1.757744 | -2.631940 |
| H  | -0.500787 | -0.550762 | -4.805930 |
| C  | 1.584028  | 0.611928  | -2.312977 |
| C  | 0.384962  | -0.073518 | -4.361912 |
| H  | 1.770528  | 1.569022  | -2.827644 |
| C  | 0.266490  | 0.006245  | -2.836580 |
| H  | 0.482692  | 0.926217  | -4.809435 |
| P  | 1.751816  | 0.883013  | -0.481167 |
| Ru | 0.000425  | 0.118034  | 0.754201  |
| H  | 0.504330  | 3.253996  | -1.818767 |
| H  | -5.869464 | -0.464899 | 1.135811  |
| H  | -3.758959 | 0.802118  | 1.078753  |
| C  | -5.201015 | -0.571264 | 0.278245  |
| C  | -4.012576 | 0.151856  | 0.240340  |
| C  | -0.928360 | 0.933922  | -2.527670 |
| C  | 1.136799  | 3.604944  | -0.999997 |
| H  | -1.768510 | 0.701809  | -3.199449 |
| C  | 1.913595  | 2.699925  | -0.265451 |
| H  | -6.475444 | -1.987589 | -0.744581 |
| C  | -5.542321 | -1.421019 | -0.774649 |
| H  | -0.636331 | 1.960833  | -2.792609 |
| P  | -1.541325 | 0.952427  | -0.788137 |
| C  | -3.139389 | 0.040187  | -0.854104 |
| H  | 0.544899  | 5.656908  | -1.292698 |
| C  | 1.155778  | 4.968103  | -0.704868 |
| C  | -4.689333 | -1.534507 | -1.868783 |
| C  | -3.498275 | -0.809721 | -1.908878 |
| C  | 2.717602  | 3.193333  | 0.774353  |
| H  | -4.948527 | -2.190338 | -2.702538 |
| H  | 3.327741  | 2.503780  | 1.364338  |
| H  | -2.859439 | -0.921048 | -2.787447 |
| C  | 1.954195  | 5.445525  | 0.333137  |
| C  | -2.118570 | 2.672974  | -0.506936 |

|   |           |           |           |
|---|-----------|-----------|-----------|
| C | 2.738589  | 4.554735  | 1.067805  |
| H | -2.213958 | 3.309195  | -2.583127 |
| H | -2.221327 | 2.341425  | 1.624501  |
| H | 1.972465  | 6.512514  | 0.564480  |
| C | -2.355334 | 3.592740  | -1.537069 |
| C | -2.361804 | 3.067573  | 0.818082  |
| H | 3.374995  | 4.923374  | 1.875250  |
| C | -2.791439 | 4.884195  | -1.244605 |
| C | -2.801025 | 4.358339  | 1.108889  |
| H | -2.973291 | 5.589542  | -2.058517 |
| H | -2.990264 | 4.648562  | 2.145124  |
| C | -3.005494 | 5.273655  | 0.077126  |
| H | -3.345833 | 6.286514  | 0.301588  |
| O | 0.214105  | 1.973944  | 2.080804  |
| C | -0.134700 | 2.046803  | 3.452218  |
| H | 0.351115  | 2.910100  | 3.928480  |
| H | -1.224456 | 2.109237  | 3.606236  |
| H | 0.233375  | 1.132991  | 3.932509  |
| O | -0.290354 | -1.531579 | 3.375251  |
| O | -1.655344 | -0.295067 | 2.123215  |
| C | -1.434622 | -1.063485 | 3.105766  |
| H | 0.019776  | 2.813997  | 1.638705  |
| H | 0.500754  | -0.974212 | 2.495614  |
| H | 1.148075  | -0.539588 | 1.912561  |
| C | -2.586247 | -1.466179 | 3.968446  |
| H | -2.873880 | -2.493672 | 3.703235  |
| H | -2.298639 | -1.484450 | 5.025755  |
| H | -3.452166 | -0.813837 | 3.814832  |

**XXIII**

|    |           |           |           |
|----|-----------|-----------|-----------|
| H  | 5.903608  | -3.423660 | 0.299792  |
| H  | 5.289636  | -2.314683 | -1.843739 |
| C  | 4.875577  | -3.099216 | 0.124547  |
| C  | 4.532199  | -2.482081 | -1.074751 |
| H  | 4.156545  | -3.800042 | 2.039587  |
| C  | 3.898386  | -3.305409 | 1.100587  |
| C  | 3.217329  | -2.071715 | -1.300971 |
| H  | 2.978854  | -1.593055 | -2.254163 |
| H  | -0.095708 | -6.577903 | -1.132780 |
| H  | -2.329018 | -6.663949 | -0.033355 |
| H  | 7.183814  | 0.706861  | 0.489616  |
| H  | 5.572931  | -0.273294 | 2.117668  |
| C  | 2.590988  | -2.885853 | 0.878324  |
| C  | -0.541207 | -5.667963 | -0.725016 |
| C  | -1.792664 | -5.715668 | -0.109310 |
| C  | 2.231830  | -2.262211 | -0.326664 |
| H  | 1.134788  | -4.442085 | -1.289445 |
| C  | 6.108658  | 0.792089  | 0.317244  |
| C  | 0.148808  | -4.462026 | -0.815816 |
| C  | 5.207419  | 0.246394  | 1.228854  |
| H  | 1.832872  | -3.060215 | 1.648745  |
| C  | -2.353172 | -4.549780 | 0.407419  |
| H  | -3.335711 | -4.576623 | 0.885909  |
| H  | 6.333793  | 1.897750  | -1.526787 |
| C  | 5.633419  | 1.455582  | -0.814906 |
| C  | -0.408441 | -3.281590 | -0.297411 |
| H  | 1.051324  | -1.944659 | -2.849664 |
| C  | -1.667630 | -3.338241 | 0.311680  |
| C  | 3.834431  | 0.352722  | 1.008798  |
| H  | 3.127375  | -0.084622 | 1.718698  |
| H  | 2.373808  | 0.451755  | -2.585728 |
| H  | -2.127161 | -2.428390 | 0.700623  |
| H  | 1.374529  | -0.366906 | -4.638358 |
| P  | 0.493310  | -1.687436 | -0.491860 |
| C  | 4.262845  | 1.563653  | -1.035334 |
| C  | 0.280464  | -1.371942 | -2.310391 |
| C  | 3.349397  | 1.002063  | -0.129327 |
| H  | 3.905982  | 2.104552  | -1.917332 |
| H  | -0.666980 | -1.859755 | -2.586886 |
| H  | -0.377953 | -0.592116 | -4.794388 |
| C  | 1.429930  | 0.928580  | -2.278476 |
| C  | 0.397977  | 0.041197  | -4.339936 |
| H  | 1.426677  | 1.910873  | -2.779178 |
| C  | 0.253302  | 0.087786  | -2.815305 |
| H  | 0.308850  | 1.044110  | -4.782414 |
| P  | 1.549031  | 1.201765  | -0.441510 |
| Ru | -0.006719 | 0.107657  | 0.771696  |
| H  | -0.120648 | 3.307415  | -1.761132 |
| H  | -5.710630 | -1.520433 | 1.131026  |
| H  | -3.863829 | 0.109041  | 1.077184  |
| C  | -5.039155 | -1.495463 | 0.269399  |
| C  | -4.000690 | -0.569587 | 0.233103  |
| C  | -1.097990 | 0.774591  | -2.517197 |
| C  | 0.424302  | 3.761542  | -0.930093 |
| H  | -1.870620 | 0.392491  | -3.201804 |
| C  | 1.356205  | 3.012679  | -0.200562 |
| H  | -6.044186 | -3.107800 | -0.764440 |
| C  | -5.229024 | -2.381610 | -0.791915 |
| H  | -0.998929 | 1.838835  | -2.777873 |
| P  | -1.718023 | 0.675341  | -0.780615 |
| C  | -3.130570 | -0.505882 | -0.867695 |
| H  | -0.555498 | 5.663357  | -1.196544 |
| C  | 0.172751  | 5.096342  | -0.612332 |
| C  | -4.376416 | -2.326543 | -1.890775 |
| C  | -3.337036 | -1.396467 | -1.929265 |
| C  | 2.038032  | 3.634167  | 0.857404  |
| H  | -4.517877 | -3.009821 | -2.730842 |
| H  | 2.764294  | 3.064967  | 1.444531  |
| H  | -2.694140 | -1.380760 | -2.812050 |
| C  | 0.851530  | 5.700864  | 0.444349  |
| C  | -2.616584 | 2.260156  | -0.521006 |

|   |           |           |           |
|---|-----------|-----------|-----------|
| C | 1.788525  | 4.967172  | 1.174270  |
| H | -2.809863 | 2.852717  | -2.602487 |
| H | -2.674367 | 1.940006  | 1.615547  |
| H | 0.657858  | 6.746131  | 0.694036  |
| C | -3.010592 | 3.113590  | -1.560268 |
| C | -2.940671 | 2.616982  | 0.797981  |
| H | 2.332204  | 5.438192  | 1.996278  |
| C | -3.680853 | 4.304485  | -1.284108 |
| C | -3.615470 | 3.805834  | 1.073344  |
| H | -3.982303 | 4.957023  | -2.106614 |
| H | -3.863988 | 4.064673  | 2.105298  |
| C | -3.976916 | 4.658808  | 0.031671  |
| H | -4.501315 | 5.592759  | 0.243441  |
| O | -0.213296 | 1.955168  | 2.094581  |
| C | -0.451802 | 1.966818  | 3.487738  |
| H | -0.121808 | 2.916859  | 3.932251  |
| H | -1.513655 | 1.800092  | 3.734502  |
| H | 0.142188  | 1.156528  | 3.926700  |
| O | -0.071159 | -1.848245 | 3.352537  |
| O | -1.562577 | -0.682404 | 2.175003  |
| C | -1.295421 | -1.492073 | 3.072940  |
| H | -0.611718 | 2.731968  | 1.674577  |
| H | 0.529804  | -1.303877 | 2.736234  |
| H | 1.183939  | -0.333891 | 1.873646  |
| C | -2.348378 | -2.148529 | 3.888607  |
| H | -2.369946 | -3.218894 | 3.640360  |
| H | -2.111987 | -2.082893 | 4.957483  |
| H | -3.330451 | -1.712205 | 3.685863  |
